# Supplementary material for: Realistic modelling of hydrogen bonding of 2-cyclohexenone with H2O and H3BO3 in the outer coordination sphere of a chiral diene/Rh(i) complex by ab initio molecular dynamics
Source: Royal Society of Chemistry journal article supplement (doi:10.1039/d3cp00830d), 2023-01-01
Supplement: d3cp00830d1.pdf [file d3cp00830d1.pdf]

# Realistic modelling of hydrogen bonding of 2-cyclohexenone with H<sub>2</sub>O and H<sub>3</sub>BO<sub>3</sub> in the outer coordination sphere of a chiral diene/Rh(I) complex by *ab initio* molecular dynamics.

Eric Assen B. Kantchev\* and Petko S. Petkov\*

*Faculty of Chemistry and Pharmacy,*

*University of Sofia,*

*1 James Bourchier Blvd, Sofia 1164, Bulgaria*

ekantchev@gmail.com

ppetkov@chem.uni-sofia.bg

## SUPPORTING INFORMATION

### Table of contents:

|                                                                                                                                    |    |
|------------------------------------------------------------------------------------------------------------------------------------|----|
| 1. Molecular dynamics methods.....                                                                                                 | 01 |
| 2. Molecular dynamics restart files.....                                                                                           | 02 |
| 3. Temperature and potential energy plots over the BOMD trajectories.....                                                          | 76 |
| 4. Single-CV well-tempered metadynamics results.....                                                                               | 77 |
| 5. Well-tempered metadynamics – convergence assessment.....                                                                        | 77 |
| 6. DFT methods.....                                                                                                                | 81 |
| 7. H-bond energies by DFT.....                                                                                                     | 81 |
| 8. Cartesian coordinates, first 3 frequencies, electronic energies, enthalpies and Gibbs free energies for all DFT structures..... | 83 |
| 9. References.....                                                                                                                 | 95 |

## 1. Molecular dynamics methods

The three full DFT AIMD simulations **S1**, **S2** and **S3** (described in the main text) were carried out using the free open source software CP2K.<sup>1</sup> The simulations were performed in NVT ensemble at 300 K, and the equations of motion were integrated with a time step of 1.0 fs over total simulation length of 20 ps. Temperature was controlled via Nose thermostat.<sup>2</sup> All DFT computations were performed by CP2K's QUICKSTEP module<sup>3</sup> using Perdew – Burke – Ernzerhof (PBE) exchange-correlation functional<sup>4</sup> augmented with Grimme's DFT-D3 dispersion correction.<sup>5</sup> For all atoms, atom kind-specific Goedecker – Teter – Hutter (GTH) pseudopotentials<sup>6</sup> incorporating scalar-relativistic core corrections (where applicable) for the inner electrons and mixed Gaussian – plane waves (GPW)<sup>7</sup> contracted double- $\zeta$  with polarisation (DZVP) MOLOPT basis set<sup>8</sup> for the valence electrons were employed. Periodic boundary conditions were applied in all three dimensions in a cubic cell with edge length of 20.1 Å. The orbital transformation method<sup>9</sup> was employed for an efficient wavefunction optimization. QUICKSTEP requires the use of a real-space (RS) integration grid to represent the electron density and the product Gaussian functions. RS grid(s) employs a multi-grid system for mapping the product Gaussians, so that wide and smooth Gaussian functions are mapped onto a coarser grid than narrow and sharp Gaussians. The electron density is always mapped onto the finest grid. Choosing a sufficiently fine integration grid for a calculation is crucial in obtaining meaningful and accurate results. The relative cutoff parameter was set to 50 Ry and the grid cutoff was 300 Ry for the BOMD simulations.<sup>10</sup> With this setup for the grid cutoff, 60% of the Gaussian functions are spawned on the finest grid and less than 4% on the two coarsest.

The thermodynamic stability of the formed H-bonded complexes was investigated by well-tempered metadynamics (WTMetaD) simulations<sup>11</sup> **M1**, **M2** and **M3** (described in the text) with time step of 0.5 fs. The initial step **M1-3** was taken from step 20000 (or at 20<sup>th</sup> ps) of simulations **S1-3**, respectively. This method focuses the computational effort only on the physically relevant regions of the collective variable space by depositing adaptive Gaussian-shaped potentials at specified intervals. The WW parameter, which defines the Gaussian height, was 0.02 hartree, the  $\Delta T$  parameter was 750 K, and the maximum interval between hills deposition was 100 steps. **M1-3** simulations were performed in the phase space of one or two collective variables (CV) as implemented in CP2K code. For system **M1** and **M2**, a single CV was defined as the coordination number of the ketone O atom ( $O_k$ ) with respect to the O atom from the closest H<sub>2</sub>O molecule or closest O atom from H<sub>3</sub>BO<sub>3</sub>, respectively. The cutoff distance (where CV = 0) was set to 3.7 Å for both. For **M3**, CV1 was defined as coordination number of the carbonyl O atom with respect to the B atom from H<sub>3</sub>BO<sub>3</sub>, and CV2 as the coordination number of the carbonyl O atom with the O atom from closest water molecule. The cutoff distances were set to 5.0 Å and 4.2 Å for CV1 and CV2, respectively.

## 2. Molecular dynamics restart files

The restart files at step 5000, after the initial thermal equilibration has occurred, are given below in their entirety for simulations **S1**, **S2** and **S3**. To reproduce the production part of the trajectory, run those files in a dedicated directory after entering the relevant basis set paths (marked in red).

### Simulation S1

---

```
&GLOBAL
  PRINT_LEVEL MEDIUM
  PROJECT_NAME MD
  RUN_TYPE MD
&END GLOBAL
&MOTION
&MD
  ENSEMBLE NVT
  STEPS 750
  TIMESTEP 9.9999999999999978E-01
  STEP_START_VAL 5000
  TIME_START_VAL 4.9999999999995689E+03
  ECONS_START_VAL -3.3889856929344137E+03
  TEMPERATURE 3.0000000000000000E+02
&THERMOSTAT
  TYPE NOSE
  REGION GLOBAL
&NOSE
  LENGTH 4
  YOSHIDA 3
  MTS 2
&COORD
  1.8295652469857195E+01 9.7800992561186373E+00 4.5270578546405043E+00
&END COORD
&VELOCITY
  8.6775824218393374E-05 2.4952612515800068E-05 3.0135837709043843E-06
&END VELOCITY
&MASS
  1.6237299232570694E+06 1.6237299232570694E+06 1.6237299232570694E+06
&END MASS
&FORCE
  5.7601845135679237E-10 9.2369772848815942E-12 -3.2865883712449332E-10 3.7532732862611510E-11 -
&END FORCE
&END NOSE
&CSVR
  TIMECON 9.9999999999999986E+01
&END CSVR
&END THERMOSTAT
&AVERAGES T
&RESTART_AVERAGES
  ITIMES_START 1
  AVECPU 1.5875835823063701E+02
  AVEHUGONIOT 0.0000000000000000E+00
  AVETEMP_BARO 0.0000000000000000E+00
  AVEPOT -3.3897892214495191E+03
  AVEKIN 1.0178987102972687E+00
  AVETEMP 2.7507625746254149E+02
  AVEKIN_QM 0.0000000000000000E+00
  AVETEMP_QM 0.0000000000000000E+00
  AVEVOL 5.4800532563775429E+04
  AVECELL_A 3.7983495271001452E+01
  AVECELL_B 3.7983495271001452E+01
  AVECELL_C 3.7983495271001452E+01
  AVEALPHA 9.0000000000000000E+01
  AVEBETA 9.0000000000000000E+01
  AVEGAMMA 9.0000000000000000E+01
  AVE_ECONS 5.3505765414851236E+00
  AVE_PRESS 0.0000000000000000E+00
```

```

    AVE_PXX      0.0000000000000000E+00
  &END RESTART_AVERAGES
&END AVERAGES
&END MD
&PRINT
  &TRAJECTORY SILENT
  ADD_LAST NUMERIC
  LOG_PRINT_KEY T
  FORMAT DCD_ALIGNED_CELL
  &EACH
    MD 1
  &END EACH
&END TRAJECTORY
&VELOCITIES OFF
  ADD_LAST NUMERIC
  LOG_PRINT_KEY T
  FORMAT XMOL
  &EACH
    MD 1
  &END EACH
&END VELOCITIES
&RESTART SILENT
  ADD_LAST NUMERIC
  LOG_PRINT_KEY T
  BACKUP_COPIES 0
  &EACH
    MD 10
  &END EACH
&END RESTART
&END PRINT
&END MOTION
&FORCE_EVAL
METHOD QS
&DFT
  BASIS_SET_FILE_NAME insert basis set path here
  POTENTIAL_FILE_NAME insert basis set path here
  MULTIPLICITY 1
  CHARGE 0
  &SCF
    MAX_SCF 60
    EPS_SCF 9.9999999999999995E-07
    SCF_GUESS ATOMIC
    &OT T
      MINIMIZER DIIS
      PRECONDITIONER FULL_SINGLE_INVERSE
    &END OT
    &OUTER_SCF T
      EPS_SCF 9.9999999999999995E-07
      MAX_SCF 5
    &END OUTER_SCF
  &PRINT
    &RESTART SILENT
    ADD_LAST NUMERIC
    COMMON_ITERATION_LEVELS 1
    FILENAME =./WFN_restart.wfn
    LOG_PRINT_KEY T
    &EACH
      QS_SCF 0
    &END EACH
  &END RESTART
&END PRINT
&END SCF
&QS
  EPS_DEFAULT 9.9999999999999998E-13
&END QS
&MGRID
  NGRIDS 5
  CUTOFF 3.0000000000000000E+02
  REL_CUTOFF 5.0000000000000000E+01
&END MGRID
&XC
  DENSITY_CUTOFF 1.0000000000000000E-10
  GRADIENT_CUTOFF 1.0000000000000000E-10
  TAU_CUTOFF 1.0000000000000000E-10

```

```

&XC_FUNCTIONAL NO_SHORTCUT
  &PBE T
  &END PBE
&END XC_FUNCTIONAL
&VDW_POTENTIAL
  POTENTIAL_TYPE PAIR_POTENTIAL
  &PAIR_POTENTIAL
    TYPE DFTD3(BJ)
    PARAMETER_FILE_NAME dftd3.dat
    REFERENCE_FUNCTIONAL PBE
  &END PAIR_POTENTIAL
&END VDW_POTENTIAL
&END XC
&POISSON
&END POISSON
&LOCALIZE T
&END LOCALIZE
&END DFT
&SUBSYS
&CELL
  A 2.0100000000000001E+01 0.000000000000000E+00 0.000000000000000E+00
  B 0.000000000000000E+00 2.0100000000000001E+01 0.000000000000000E+00
  C 0.000000000000000E+00 0.000000000000000E+00 2.0100000000000001E+01
  PERIODIC XYZ
  MULTIPLE_UNIT_CELL 1 1 1
&END CELL
&COORD
Rh 6.0565619275861025E+00 8.4702890286403285E+00 7.1920811762337769E+00
C 5.1093022330313076E+00 1.0388884705473474E+01 7.4538737962751078E+00
C 7.4402917076892940E+00 1.0733856670740892E+01 8.3214416806240976E+00
C 9.5253425902596049E+00 8.3785308896211728E+00 8.1804000153265424E+00
C 3.5922123059602664E+00 1.0264093753450179E+01 7.4226479927161302E+00
C 2.8810191266281469E+00 1.0465595331938744E+01 8.5704183491842709E+00
C 6.0067735664225150E+00 1.0220577118520190E+01 8.6036012771898402E+00
C 5.8165116807982580E+00 1.0975708171230520E+01 6.2691056808625554E+00
C 1.6637943123795274E+00 9.2060871506435866E+00 6.3236887983576686E+00
C 1.1663154683944507E+01 8.0583731701891104E+00 7.1261089828417061E+00
C 7.2717369104094765E+00 1.2236938088868300E+01 8.0102360599164708E+00
C 6.9699497421138332E+00 1.0033671148631216E+01 6.0070569118883794E+00
C 1.5719461978041418E+00 9.9194053791060259E+00 8.6171231953154468E+00
C 7.7763238779156767E+00 9.8555916406151329E+00 7.1164126940503767E+00
C 1.0093091479191928E+01 9.6973055850494649E+00 6.1804290964725412E+00
C 2.9739444005585334E+00 9.6571202345714386E+00 6.2822652273938431E+00
C 6.2603212471184531E+00 1.2357566079502901E+01 6.8228454063229220E+00
C 9.9753607581714765E-01 9.1632315415078001E+00 7.5814763790210487E+00
C 9.1552975427018435E+00 9.2867534296639853E+00 7.1527320912574321E+00
C 1.1343311539914229E+01 9.0390839753880190E+00 6.1879537045029362E+00
C 1.0748563973838719E+01 7.6812096157013334E+00 8.1474594780508340E+00
H 8.8071004941544047E+00 8.0571024847495654E+00 8.9828411265673669E+00
H 1.2613960779432414E+01 7.5308124904821385E+00 7.2376927304268044E+00
H 9.9016821863156128E+00 1.0375291848584508E+01 5.3191623707884759E+00
H 1.2169152925727985E+01 9.3168901679774905E+00 5.4400918849814195E+00
H 1.0957211628336088E+01 6.9133795438056360E+00 8.9144829847069307E+00
H 3.3167919004351951E+00 1.0994968625770554E+01 9.3873512422661420E+00
H 1.2629021430372225E+00 8.6378186522594120E+00 5.5079161061330044E+00
H 9.9325359343740216E-01 1.0111347955634761E+01 9.5641853964009034E+00
H 3.5245535858661015E+00 9.6135652744947144E+00 5.3860502444818508E+00
H 8.0373638996127469E-02 8.6222135045493786E+00 7.7241002391213263E+00
H 8.2360757585416646E+00 1.0518150735203943E+01 9.0988288959515362E+00
H 5.1448889407632761E+00 1.1143084582640997E+01 5.3916841239932953E+00
H 6.9504109632580287E+00 1.2759793201673988E+01 8.9339539800070504E+00
H 8.2237874966860769E+00 1.2782137446862077E+01 7.6811898329644048E+00
H 6.7215470872012126E+00 1.2962996069615725E+01 6.0736678039670835E+00
H 5.3722178810286083E+00 1.2881924163836933E+01 7.1915045151879715E+00
H 7.1168888667534747E+00 9.6530571601419730E+00 5.0060027143636372E+00
H 5.6569139740868986E+00 1.0091611793943654E+01 5.6232003287066004E+00
C 6.6179839767753146E+00 7.2397824228217136E+00 6.6697278680330410E+00
C 7.9927393680364220E+00 6.8606167124447044E+00 5.6712642554966965E+00
C 5.8685692633556208E+00 6.8593867455622162E+00 4.5294039801402315E+00
C 8.4895513228898878E+00 6.0600818401385572E+00 4.6368005093292304E+00
H 8.6669651975969906E+00 7.0951681011015326E+00 6.5154919991514575E+00
C 6.4120739414276144E+00 6.1084662464770227E+00 3.4519534432223673E+00
H 4.8169745036974057E+00 7.1113407530529447E+00 4.6315862740954268E+00
C 7.6975011632253443E+00 5.5661967288370038E+00 3.5567479445600614E+00

```

|   |                         |                        |                         |
|---|-------------------------|------------------------|-------------------------|
| H | 9.5257095966202421E+00  | 5.6946262332056303E+00 | 4.7349902392664145E+00  |
| H | 5.8366389095621525E+00  | 5.7697123203549463E+00 | 2.5726082104270644E+00  |
| H | 8.1624711086127135E+00  | 4.9116317151619171E+00 | 2.8650503087725956E+00  |
| C | 5.1088562790985668E+00  | 6.5620880417230749E+00 | 7.8148700611589188E+00  |
| C | 4.6973334225456327E+00  | 7.6968740859829250E+00 | 8.6313380630747414E+00  |
| H | 4.3903672262638294E+00  | 6.2838732968638480E+00 | 6.9794741358368624E+00  |
| H | 3.7177092842283770E+00  | 8.1303508404545894E+00 | 8.5544068374294131E+00  |
| C | 5.2360729041225689E+00  | 7.6738034713820227E+00 | 1.0014142448114232E+01  |
| O | 4.8674301438094858E+00  | 8.4536578026407430E+00 | 1.0869513270461150E+01  |
| C | 6.2056982788389679E+00  | 6.5946788219489783E+00 | 1.0482351111899479E+01  |
| H | 6.8969700175570505E+00  | 6.9547698663864672E+00 | 1.1212011458812649E+01  |
| C | 5.9931442763658289E+00  | 5.4246656840168326E+00 | 8.2807367842604336E+00  |
| C | 6.9198287328613084E+00  | 5.7599005218372152E+00 | 9.4124412566683873E+00  |
| H | 5.5197889459866207E+00  | 5.9418570420550223E+00 | 1.1068724665980394E+01  |
| H | 7.7717465000677395E+00  | 6.3532718500610974E+00 | 8.9740637502189244E+00  |
| H | 7.3651609831581668E+00  | 4.8770821392961210E+00 | 9.8502628687400851E+00  |
| H | 5.3261689895095712E+00  | 4.5614101720581397E+00 | 8.5483719176898614E+00  |
| H | 6.6517023524991625E+00  | 5.1747013557515373E+00 | 7.4485815086814497E+00  |
| O | 5.5614214921626646E+00  | 9.0811153654814412E+00 | 1.3458468249036247E+01  |
| O | 4.2174723342571703E+00  | 1.2770866472154196E+01 | 1.0156970516189036E+01  |
| O | 1.2166823058362663E+01  | 2.2193908810708081E+00 | 9.9128863028700600E+00  |
| O | 2.6575313957024913E+00  | 9.5217515302688120E+00 | 1.2458809592483700E+01  |
| O | 7.7622036650902420E+00  | 8.7867454313947349E+00 | -7.9883532470236240E-01 |
| H | 5.1595882936447204E+00  | 9.0044094358597064E+00 | 1.2560565887238431E+01  |
| H | 6.0310730538944570E+00  | 8.2456607596427851E+00 | 1.3549119710139902E+01  |
| H | 4.5231558608684042E+00  | 1.3601332223488740E+01 | 9.6916569339803580E+00  |
| H | 4.9599933640208693E+00  | 1.2544975443670706E+01 | 1.0824683468666107E+01  |
| H | 1.2596308253306747E+01  | 2.3398366388251897E+00 | 1.0840515968868315E+01  |
| H | 1.2535111722197858E+01  | 3.0360280705494334E+00 | 9.4560452628351310E+00  |
| H | 3.2700203089845385E+00  | 9.3490816195934094E+00 | 1.3178278262293693E+01  |
| H | 3.1809779512532641E+00  | 1.0056391102738225E+01 | 1.1826744115398389E+01  |
| H | 8.713399036593104E+00   | 8.6943612413873108E+00 | -9.7107062720808135E-01 |
| H | 7.6461283324865050E+00  | 9.7367181757896883E+00 | -8.8973089408456552E-01 |
| C | -4.7754465267743669E+00 | 1.9397448713385540E+01 | 1.0243977985266588E+01  |
| C | -2.6063700976930591E+00 | 1.8905447162563313E+01 | 9.3370206935886912E+00  |
| H | -5.7625616132684181E+00 | 1.8934029023285131E+01 | 1.0314169738691366E+01  |
| H | -4.8378803211645547E+00 | 2.0191097343815741E+01 | 9.4788813661592286E+00  |
| H | 1.5378310192639544E+01  | 2.0448443383477539E+01 | 1.2142386711674479E+01  |
| H | 1.5959524607813877E+01  | 1.8739663404498181E+01 | 1.2141902484627366E+01  |
| H | -2.1128240976515866E+00 | 1.7910645700321382E+01 | 8.9926080510573634E+00  |
| H | -2.5123210025366607E+00 | 1.9613709203459059E+01 | 8.4821758327628682E+00  |
| H | 1.8259011061959338E+01  | 1.8485311278658870E+01 | 1.1424557693722631E+01  |
| H | 1.9041877943158578E+01  | 1.9872726008231673E+01 | 1.0609439508515955E+01  |
| O | 4.2739891230227451E+00  | 1.1332910902715620E+01 | -2.7730083525630218E+00 |
| O | 7.1317685747564612E+00  | 1.1066772969106562E+01 | -2.4644434288055170E+00 |
| C | 6.4300513252086580E+00  | 1.2337097664402576E+01 | -2.2074854978136913E+00 |
| C | 6.3916515928073210E+00  | 1.0298599162860128E+01 | -3.5196865451257380E+00 |
| C | 4.977336667845764E+00   | 1.0152405458633000E+01 | -3.0659934097748573E+00 |
| C | 4.9814844671064842E+00  | 1.2072891747547613E+01 | -1.7885916315951838E+00 |
| H | 4.3719629128344710E+00  | 9.6184888723995652E+00 | -3.8210216259219356E+00 |
| H | 4.9100058636225086E+00  | 9.4974395915139649E+00 | -2.1797036288893517E+00 |
| H | 6.9626601617926545E+00  | 9.3536105695286196E+00 | 1.6539145744369367E+01  |
| H | 6.3839059017621551E+00  | 1.0888400689008101E+01 | 1.5680113727817071E+01  |
| H | 4.4150142981517382E+00  | 1.3029702687744834E+01 | -1.8418742338960552E+00 |
| H | 4.9900396977634580E+00  | 1.1602005248332047E+01 | -7.9314230850977618E-01 |
| H | 6.5168877704884141E+00  | 1.3102399636284888E+01 | -3.0265875092541625E+00 |
| H | 6.9747918743959447E+00  | 1.2746269982790762E+01 | -1.2953707456514145E+00 |
| O | 1.8474229826178810E+00  | 8.4086734010039486E+00 | 1.7364306406831354E+01  |
| O | 1.3523727719582698E-01  | 9.5250154721550544E+00 | 1.5382974463670854E+01  |
| C | -9.9473752289860509E-02 | 9.6976647600228905E+00 | 1.6781929507370560E+01  |
| C | 6.0429245469289994E-01  | 8.1508266352378023E+00 | 1.5311205122448564E+01  |
| C | 1.9073375145259173E+00  | 8.0027825691062890E+00 | 1.5991109697468250E+01  |
| C | 1.2044162854842209E+00  | 9.6553302943902626E+00 | 1.7539509508611829E+01  |
| H | 2.1447625890129292E+00  | 6.9514918292228653E+00 | 1.5982434661341598E+01  |
| H | 2.7419567716763886E+00  | 8.4465855645764556E+00 | 1.5483837672579572E+01  |
| H | 7.7039407063877097E-01  | 7.9443301326012357E+00 | 1.4254223033595276E+01  |
| H | -9.7759783360056182E-02 | 7.4753934455372653E+00 | 1.5764252108447096E+01  |
| H | 2.1084586441330696E+01  | 9.6928980286779751E+00 | 1.8656211684371630E+01  |
| H | 2.2019953631314348E+01  | 1.0432483828435648E+01 | 1.7322411918770275E+01  |
| H | -7.6507332716604670E-01 | 8.8914639243157634E+00 | 1.7152384601213683E+01  |
| H | 1.9393994204415566E+01  | 1.0641147456939095E+01 | 1.6831277454578764E+01  |
| O | 1.5917279749430660E+01  | 1.0277789666013051E+01 | 6.4598575706177472E+00  |
| O | -3.8344531657444993E+00 | 1.3147715316213221E+01 | 6.3381741761777803E+00  |
| C | -5.1028043148114115E+00 | 1.2488830934350403E+01 | 6.3762072375679972E+00  |

|   |                         |                         |                         |
|---|-------------------------|-------------------------|-------------------------|
| C | -2.9219097713382496E+00 | 1.2264965383545951E+01  | 5.6744794445840574E+00  |
| C | 1.7209022375350099E+01  | 1.0933549614417542E+01  | 6.4261294914796716E+00  |
| C | 1.5050035257230842E+01  | 1.1217576667035031E+01  | 7.1716551138518332E+00  |
| H | 1.7991771939732065E+01  | 1.0297689519894119E+01  | 5.9888688096678608E+00  |
| H | 1.7589394283113769E+01  | 1.1228415916674189E+01  | 7.4116343472994899E+00  |
| H | -1.9266903113142704E+00 | 1.2769021101687908E+01  | 5.6906823332663539E+00  |
| H | -3.2044322462266401E+00 | 1.2111445806743554E+01  | 4.6251229255450932E+00  |
| H | 1.4054723191549245E+01  | 1.0793361080446612E+01  | 7.1670798561460822E+00  |
| H | 1.5335170218949820E+01  | 1.1290650431073626E+01  | 8.2030077613795527E+00  |
| H | -5.4224382956090516E+00 | 1.2242579023239205E+01  | 5.3320239546230273E+00  |
| H | -5.8545919181672570E+00 | 1.3213563037008665E+01  | 6.8120728680876663E+00  |
| O | 1.3261787638162200E+01  | 9.1016608051992893E+00  | 1.8019354894400198E+01  |
| O | 1.0601982728779745E+01  | 8.6369258106493074E+00  | -7.9994594891379522E-01 |
| C | 1.1185440737891600E+01  | 7.8051520616481085E+00  | -1.8324059716550376E+00 |
| C | 1.1129802179449662E+01  | 9.9542883549194929E+00  | -1.0326773979418808E+00 |
| C | 1.2731859902642661E+01  | 9.9482485540569972E+00  | 1.9031158202370474E+01  |
| C | 1.2677868077768144E+01  | 7.8585351674943089E+00  | 1.8301954822185571E+01  |
| H | 1.3123753403371749E+01  | 1.0948463188925389E+01  | 1.8797333997121267E+01  |
| H | 1.2972098551306306E+01  | 9.5618130511594579E+00  | 2.0005936188804633E+01  |
| H | 1.0728654980899826E+01  | 1.0549997358759553E+01  | -1.7964087337497783E-01 |
| H | 1.0728342551174013E+01  | 1.0402471946046669E+01  | -1.9375885153112951E+00 |
| H | 1.3175623757069982E+01  | 7.1465950183440672E+00  | 1.7659196491883652E+01  |
| H | 1.3091906287242344E+01  | 7.5766879633391158E+00  | 1.9359977475795311E+01  |
| H | 1.0783737862043298E+01  | 8.1017607101992937E+00  | -2.8135057411505713E+00 |
| H | 1.0871403354433090E+01  | 6.7706874574057867E+00  | -1.5640879028680827E+00 |
| O | 7.8098187877255825E+00  | 1.1099140015969808E+00  | 1.1265514285399666E+01  |
| O | 5.6932833414949506E+00  | 2.0889762692326701E+00  | 9.5866816006051341E+00  |
| C | 5.6007433063434409E+00  | 2.1963799627875082E+00  | 1.1023200394850360E+01  |
| C | 6.4080597291944335E+00  | 9.4326103699487973E-01  | 9.1766054745646244E+00  |
| C | 7.7998980116194021E+00  | 9.5013478086259684E-01  | 8.8592240604859089E+00  |
| C | 6.9556097013380436E+00  | 2.2256814172632127E+00  | 1.1714237227339037E+01  |
| H | 8.3175480415876137E+00  | -1.0724878365284084E-02 | 9.6200081964121225E+00  |
| H | 8.4458056947673139E+00  | 1.7483811025534584E+00  | 9.3972675231957812E+00  |
| H | 6.6016136116252602E+00  | 1.1112366397268270E+00  | 8.1519391126073444E+00  |
| H | 5.8203471210629028E+00  | 6.8948754083657707E-02  | 4.0622219555395483E+00  |
| H | 6.8495537312133150E+00  | 2.0183099186584683E+00  | 1.2774031472311753E+01  |
| H | 7.4105836306961699E+00  | 3.1996099802795714E+00  | 1.1543592452536934E+01  |
| H | 5.0250258296254611E+00  | 1.3468265143081428E+00  | 1.1397536837975425E+01  |
| H | 5.0740796198425366E+00  | 3.1136232975806957E+00  | 1.1136958693652701E+01  |
| O | 1.6431761625110422E+01  | 1.2140733346528119E+01  | 1.0975586183762660E+01  |
| O | -1.2712194309171256E+00 | 1.2198779381799115E+01  | 9.5291920355032946E+00  |
| C | 1.8615630418827866E+01  | 1.1127146369254408E+01  | 1.0399744273562543E+01  |
| C | 1.8380201407198594E+01  | 1.3345064879986621E+01  | 1.0184254872441198E+01  |
| C | 1.6841751487621192E+01  | 1.3190510396857427E+01  | 1.0129499794030522E+01  |
| C | 1.7039544806263237E+01  | 1.0907252773788953E+01  | 1.0690280800949015E+01  |
| H | 1.6391534324504008E+01  | 1.4050789274512113E+01  | 1.0599368999091549E+01  |
| H | -3.5896690864361647E+00 | 1.2991153746858716E+01  | 9.1194911356822832E+00  |
| H | -1.2653675046358295E+00 | 1.4165260079012739E+01  | 9.6449557836782063E+00  |
| H | 1.8729053981243883E+01  | 1.3462352569374490E+01  | 1.1187994272600795E+01  |
| H | 1.6999874944992559E+01  | 1.0251195551178656E+01  | 1.1571700770739659E+01  |
| H | -3.6009486294773883E+00 | 1.0374476186923911E+01  | 9.8372081625937522E+00  |
| H | 1.9266103151304545E+01  | 1.1297620355105650E+01  | 1.1300388182553879E+01  |
| H | 1.8987071779704713E+01  | 1.0193742464813644E+01  | 9.8845263608136644E+00  |
| O | 1.4025240587827764E+01  | 7.3251363646092189E+00  | 2.3321097671869335E+00  |
| O | 1.1648712924876493E+01  | 5.7935590222676572E+00  | 3.1515570392006702E+00  |
| C | 1.2358111784129010E+01  | 5.4630606449477286E+00  | 1.9641339069526378E+00  |
| C | 1.1643658551026649E+01  | 7.2203817139781554E+00  | 3.2039128447909744E+00  |
| C | 1.3066979220316407E+01  | 7.8101409253128420E+00  | 3.3464815152806526E+00  |
| C | 1.3814698031348719E+01  | 5.9098633355051780E+00  | 2.0592716176758628E+00  |
| H | 1.3054529142551653E+01  | 8.8921601571016158E+00  | 3.1868956937950879E+00  |
| H | 1.3496980712496208E+01  | 7.5438629078026747E+00  | 4.2635143567782192E+00  |
| H | 1.1050053045149330E+01  | 7.5925935002783795E+00  | 4.0302685807678662E+00  |
| H | 1.1072102874457975E+01  | 7.6722665371342895E+00  | 2.3906405201240033E+00  |
| H | 1.4206241580283315E+01  | 5.6798830469552328E+00  | 1.0854408862512819E+00  |
| H | 1.4191893815956886E+01  | 5.2048036149387729E+00  | 2.8674804866243058E+00  |
| H | 1.1758284470609876E+01  | 5.9128703095497439E+00  | 1.1776621804490153E+00  |
| H | 1.2308656323515336E+01  | 4.3561360883756368E+00  | 1.7467467128627083E+00  |
| O | 1.5442794249313321E+01  | 2.5677784946546995E+00  | 5.4660579993738070E+00  |
| O | 1.3956029970873464E+01  | 3.9572018982014949E+00  | 7.7138199624699064E+00  |
| C | 1.4089420546567197E+01  | 4.3704584519985366E+00  | 6.3777878905543890E+00  |
| C | 1.5213379960970213E+01  | 3.2462386146743962E+00  | 7.8894260494420472E+00  |
| C | 1.5445849201847203E+01  | 2.1466706827962727E+00  | 6.8614584912122689E+00  |
| C | 1.4224111332625087E+01  | 3.2507963452223949E+00  | 5.3602678941246849E+00  |
| H | 1.6441872280226356E+01  | 1.7385634583054590E+00  | 6.9641795844128191E+00  |

|   |                         |                        |                         |
|---|-------------------------|------------------------|-------------------------|
| H | 1.4828703129281845E+01  | 1.1892871923674384E+00 | 6.9944436180314060E+00  |
| H | 1.5257452971300420E+01  | 2.7532201549475648E+00 | 8.8710819383832398E+00  |
| H | 1.6051725098038489E+01  | 4.0399139099209735E+00 | 7.8378157143361440E+00  |
| H | 1.4194361015725180E+01  | 3.4993214412696938E+00 | 4.2982431443332025E+00  |
| H | 1.3448617376414671E+01  | 2.5042356508231269E+00 | 5.5221607760151210E+00  |
| H | 1.494782509356008E+01   | 5.0804926013635230E+00 | 6.1921603283601740E+00  |
| H | 1.3213041104847161E+01  | 5.0223717740838199E+00 | 6.1603249849371240E+00  |
| O | 9.5782203669808776E+00  | 7.3981232321321162E+00 | 1.3282633222536907E+01  |
| O | 1.2422751320168086E+01  | 7.4299717407121397E+00 | 1.3002626028761540E+01  |
| C | 1.1541051903791613E+01  | 7.0263093315654688E+00 | 1.1885621974744739E+01  |
| C | 1.1860927506782360E+01  | 7.1314966192745226E+00 | 1.4243161311690766E+01  |
| C | 1.0487339989917881E+01  | 7.7080566188157098E+00 | 1.4398799954750407E+01  |
| C | 1.0228187613537008E+01  | 7.6916091878863995E+00 | 1.2018469115356027E+01  |
| H | 9.9018452927019744E+00  | 7.4580936442730019E+00 | 1.5300994953634424E+01  |
| H | 1.0501613796361937E+01  | 8.7879034053335658E+00 | 1.4477194850393410E+01  |
| H | 1.2549732277588310E+01  | 7.5961534662500965E+00 | 1.4988004436546399E+01  |
| H | 1.1858179721539566E+01  | 6.0520276869324281E+00 | 1.4423987485640742E+01  |
| H | 9.5672758395931439E+00  | 7.3192419170311114E+00 | 1.1235731404935803E+01  |
| H | 1.0329579699954797E+01  | 8.7862613034567971E+00 | 1.1979561675345563E+01  |
| H | 1.1513176444683006E+01  | 5.9192589861168825E+00 | 1.1959862048753816E+01  |
| H | 1.2036788581325007E+01  | 7.4131501781448419E+00 | 1.0976833782394952E+01  |
| O | 1.2928704951732783E+01  | 1.5414149482005326E+01 | 7.5630287323472434E+00  |
| O | 1.3173791838848675E+01  | 1.6667802050191732E+01 | 1.0009515281032874E+01  |
| C | 1.4140718760623999E+01  | 1.5717887107519742E+01 | 9.5825480894556563E+00  |
| C | 1.1865714825492608E+01  | 1.6462501754182284E+01 | 9.4979982387439161E+00  |
| C | 1.1902826114932628E+01  | 1.6328590182967208E+01 | 7.9647344928827115E+00  |
| C | 1.4247353194649479E+01  | 1.5697297465181265E+01 | 8.1130344023612526E+00  |
| H | 1.0965133039184240E+01  | 1.5861653079674831E+01 | 7.5668143679632687E+00  |
| H | 1.2153262959518832E+01  | 1.7320965765219064E+01 | 7.5992805420441014E+00  |
| H | 1.1265271050176926E+01  | 1.7342016262866014E+01 | 9.7076632579606255E+00  |
| H | 1.1496725056039532E+01  | 1.5432179057391460E+01 | 9.8434565926256319E+00  |
| H | 1.5018370411719697E+01  | 1.4912905732594549E+01 | 7.8259039780121888E+00  |
| H | 1.4648902330055705E+01  | 1.6638087332147769E+01 | 7.7519241521121298E+00  |
| H | 1.3959804538183615E+01  | 1.4670180924788150E+01 | 9.9929764365892098E+00  |
| H | 1.5052354000085966E+01  | 1.6042847243289636E+01 | 1.0037576306785668E+01  |
| O | 2.5132015223375461E+00  | 4.0133679180749233E+00 | 5.0237097922938485E+00  |
| O | 3.9839159618608577E+00  | 1.4873879964482775E+00 | 4.7329412319128004E+00  |
| C | 4.5010691150127018E+00  | 2.6170233143545221E+00 | 5.4482622657681841E+00  |
| C | 3.1412010854171282E+00  | 1.9484397930093149E+00 | 3.6866367677236767E+00  |
| C | 2.0770793834460650E+00  | 2.9436269325230460E+00 | 4.1476215382725581E+00  |
| C | 3.3985639892360036E+00  | 3.4798964302009003E+00 | 6.0991780328526541E+00  |
| H | 2.1699047111837466E+01  | 3.4831891935393831E+00 | 3.3246816361902529E+00  |
| H | 1.2381482712478165E+00  | 2.4510362686605882E+00 | 4.6408174118762737E+00  |
| H | 2.2814737877358088E+01  | 1.0038113888543925E+00 | 3.2755449150647733E+00  |
| H | 3.8261014974769623E+00  | 2.3860406810181241E+00 | 2.9159286812356666E+00  |
| H | 3.8014512202356281E+00  | 4.3548776077761833E+00 | 6.5909426036324898E+00  |
| H | 2.8520562487856753E+00  | 2.7696335719350236E+00 | 6.7901048688326764E+00  |
| H | 4.9922054431701257E+00  | 3.2286018183472542E+00 | 4.6796019093222059E+00  |
| H | 5.2616326773437434E+00  | 2.2779659301036772E+00 | 6.2112997491297319E+00  |
| O | 9.8816500444880706E+00  | 1.6674894581998590E+01 | 1.8855242982245201E+01  |
| O | 8.1764394923352359E+00  | 1.7641978629636462E+01 | 7.5682326574842662E-01  |
| C | 7.8839741225840259E+00  | 1.7829310616577590E+01 | -6.5492695855957495E-01 |
| C | 9.5831341555270484E+00  | 1.7466461661654915E+01 | 1.0396281214279599E+00  |
| C | 1.0239754661828190E+01  | 1.6343513561495701E+01 | 2.0226412715188747E+01  |
| C | 8.4384715603185363E+00  | 1.6781445279949398E+01 | -1.5564166550677896E+00 |
| H | 1.1322522724070877E+01  | 1.6391270203448624E+01 | 2.0275524098274285E+01  |
| H | 9.8312487068314933E+00  | 1.5373879984028502E+01 | 2.0544131854937788E+01  |
| H | 9.6238285959416814E+00  | 1.6971690566533994E+01 | 2.0413551635924829E+00  |
| H | 1.0224127377100547E+01  | 1.8373734580251927E+01 | 1.0213473298790441E+00  |
| H | 8.3801223426890825E+00  | 1.7129944986705908E+01 | -2.6071870018283070E+00 |
| H | 8.0373809277918031E+00  | 1.5763717943321046E+01 | 1.8656747116866097E+01  |
| H | 8.2539642958559263E+00  | 1.8792160277833027E+01 | -9.7076563618280576E-01 |
| H | 6.7956775873998163E+00  | 1.7885360950612558E+01 | -7.0975682615079649E-01 |
| O | 1.9361570724233076E+01  | 1.8614001878514124E+01 | 1.4238016332788028E+01  |
| O | 6.3327188320556893E-01  | 1.9231680085473894E+01 | 1.6703990158454822E+01  |
| C | 1.2911376279182716E+00  | 1.9187473872464480E+01 | 1.5440504117576348E+01  |
| C | -4.1653384624595646E-01 | 1.8239207093821090E+01 | 1.6720123729370520E+01  |
| C | 1.8679021436648103E+01  | 1.8454155148557394E+01 | 1.5559211568575547E+01  |
| C | 2.0456456876393990E+01  | 1.9654241062680125E+01 | 1.4422163836043520E+01  |
| H | 1.7965766612048373E+01  | 1.7564852265937564E+01 | 1.5466325715264412E+01  |
| H | 1.7998132331598505E+01  | 1.9261949869055364E+01 | 1.5822722491487996E+01  |
| H | -1.0019555927709882E+00 | 1.8449995109900851E+01 | 1.7616888921984152E+01  |
| H | 5.3011211254541529E-02  | 1.7220440318387936E+01 | 1.6847591657460271E+01  |
| H | 2.0856766263888030E+01  | 1.9654865196420964E+01 | 1.3388264999631438E+01  |



|   |                        |                         |                         |
|---|------------------------|-------------------------|-------------------------|
| H | 1.9943112863308336E+01 | 2.0569125370800695E+01  | 1.4678523544545484E+01  |
| H | 1.6465261615453737E+00 | 1.8163231521764168E+01  | 1.5289311549093405E+01  |
| H | 2.2632819556627628E+00 | 1.9690283442887814E+01  | 1.5565158002837466E+01  |
| O | 1.9310925559547567E+01 | 3.4780207443606006E+00  | 1.3803621067775689E+01  |
| O | 1.7002407088902537E+01 | 4.6666764212530740E+00  | 1.2657259607811014E+01  |
| C | 1.7725625235731044E+01 | 3.5908157788210904E+00  | 1.1977623501878236E+01  |
| C | 1.7920792071588707E+01 | 5.4676952895784501E+00  | 1.3389371830758837E+01  |
| C | 1.8577090218573527E+01 | 4.6166348182289223E+00  | 1.4423472936367849E+01  |
| C | 1.8376753424119734E+01 | 2.6995278953752693E+00  | 1.3007767255387030E+01  |
| H | 1.9267485167026393E+01 | 5.2318915017619396E+00  | 1.5061184890930413E+01  |
| H | 1.7783850976708830E+01 | 4.2221162035032611E+00  | 1.5101747024958005E+01  |
| H | 1.7352221537982370E+01 | 6.3373651477080069E+00  | 1.3850330403659376E+01  |
| H | 1.8614061576244161E+01 | 5.9811720697274851E+00  | 1.2680743015452352E+01  |
| H | 1.8970123949760723E+01 | 1.9065024139146880E+00  | 1.2480523907007710E+01  |
| H | 1.7599917222028303E+01 | 2.3463382253080831E+00  | 1.3745264630859651E+01  |
| H | 1.8566664112551727E+01 | 4.0867529612002738E+00  | 1.1444441755320188E+01  |
| H | 1.6987902470957991E+01 | 3.0706767432084363E+00  | 1.1393737491562156E+01  |
| O | 1.8306211771034193E+00 | 1.8729126065254952E+01  | 1.1911817064395942E+01  |
| O | 3.3301209829827112E+00 | 1.6489801571056720E+01  | 1.0989558364095686E+01  |
| C | 3.8525940869507243E+00 | 1.7793072189252218E+01  | 1.0805151440406817E+01  |
| C | 1.8724138560110386E+00 | 1.6458204774613435E+01  | 1.1024334133977973E+01  |
| C | 1.3885547858503549E+00 | 1.7323043076083074E+01  | 1.2169820305605382E+01  |
| C | 3.3399920518455275E+00 | 1.8797457251629186E+01  | 1.1874912420934290E+01  |
| H | 3.3631328345455047E-01 | 1.7443814812935194E+01  | 1.2315976255731039E+01  |
| H | 1.8519204505267053E+00 | 1.6962546905749072E+01  | 1.3067724860842544E+01  |
| H | 1.5668380270968678E+00 | 1.5384474849995481E+01  | 1.1163669819152892E+01  |
| H | 1.4576825947885028E+00 | 1.6720449570408736E+01  | 1.0060517710436606E+01  |
| H | 3.6414543535187271E+00 | 1.9819018152241767E+01  | 1.1654376002635892E+01  |
| H | 3.7130913853654652E+00 | 1.8427012071011440E+01  | 1.2881369145660827E+01  |
| H | 3.5269478580183105E+00 | 1.8076959267932750E+01  | 9.7871444734438828E+00  |
| H | 4.9642276541585879E+00 | 1.7741222482478562E+01  | 1.0768983179201193E+01  |
| O | 1.3572622734175940E+01 | -8.0285676623549274E-01 | 2.7829746905609669E+00  |
| O | 1.3128960345523364E+01 | 1.8000452391583563E+00  | 1.4195606465841335E+00  |
| C | 1.2093856390332704E+01 | 1.2075385589479462E+00  | 2.1012482490381270E+00  |
| C | 1.3927974152696226E+01 | 6.8237679196711765E-01  | 8.3805467570656300E-01  |
| C | 1.4518888147977588E+01 | -1.4673954975014580E-01 | 1.9224651817162197E+00  |
| C | 1.2553187207465529E+01 | 1.2605361069041754E-01  | 3.1496250694722550E+00  |
| H | 1.5162725047360789E+01 | 1.9127687968390763E+01  | 1.4719426557530815E+00  |
| H | 1.5234298112833200E+01 | 2.0580806234600161E+01  | 2.5039850229812513E+00  |
| H | 1.4774142614715361E+01 | 2.1236222064568093E+01  | 2.8527512521699644E-01  |
| H | 1.3367392901924026E+01 | 6.0782004492768958E-02  | 1.4698167905687126E-01  |
| H | 1.1636699380829215E+01 | -3.7586306719983142E-01 | 3.4176690074634215E+00  |
| H | 1.2909205068188962E+01 | 6.2811894788799982E-01  | 4.0193352732694319E+00  |
| H | 1.1323760214413682E+01 | 7.5785717388947471E-01  | 1.4892603399921844E+00  |
| H | 1.1626270063525144E+01 | 2.0317441218398264E+00  | 2.7203156484194086E+00  |
| O | 5.4133207162758019E+00 | 1.4007061829247662E+00  | -9.6352828784099709E-01 |
| O | 6.4920438973455870E+00 | 2.0632495395151094E+00  | 1.6173394824893050E+00  |
| C | 7.1182947840400432E+00 | 2.6002208950385866E+00  | 3.141913661996706E-01   |
| C | 5.7984474520000937E+00 | 9.0645301349669816E-01  | 1.4784607221753576E+00  |
| C | 4.7471838288448280E+00 | 1.1272199896266486E+00  | 3.6425756134836723E-01  |
| C | 6.1250608998959981E+00 | 2.6901020660068045E+00  | -7.6848301801181640E-01 |
| H | 4.1099034528326914E+00 | 2.9721349029973021E-01  | 2.165340564659378E-01   |
| H | 4.1684614615409146E+00 | 1.9692506485260839E+00  | 7.0833842772291999E-01  |
| H | 5.3950851407530420E+00 | 7.2738244082294223E-01  | 2.4647548267042034E+00  |
| H | 6.4083648194914913E+00 | 1.8397081643386635E-02  | 1.1461146868475887E+00  |
| H | 6.7972355460107261E+00 | 2.8115680436012123E+00  | -1.5735213365756346E+00 |
| H | 5.5105885356062814E+00 | 3.6080183501054477E+00  | -6.5061542652640703E-01 |
| H | 8.0061029978299789E+00 | 1.9583856624354499E+00  | 2.0123664650541931E-01  |
| H | 7.5069969260655443E+00 | 3.6009745974342131E+00  | 8.0095445539728638E-01  |
| O | 1.5986137641789666E+01 | 1.5524850994642657E+01  | 1.2077112557581722E+00  |
| O | 1.3284695414415165E+01 | 1.4551249790130692E+01  | 6.8929800393465268E-01  |
| C | 1.4368534470886781E+01 | 1.3741961370933382E+01  | 1.2582784173664496E+00  |
| C | 1.3937775030924115E+01 | 1.5517269489184597E+01  | -1.7758450218577981E-01 |
| C | 1.4978070767672927E+01 | 1.6329758968786681E+01  | 5.7150753858537873E-01  |
| C | 1.5363591771069789E+01 | 1.4551001853636226E+01  | 2.0514335628834370E+00  |
| H | 1.5519661026536328E+01 | 1.7022159479533368E+01  | -5.3706887255391016E-02 |
| H | 1.4386129550441115E+01 | 1.6936040877323695E+01  | 1.3215858805436020E+00  |
| H | 1.3182982745469396E+01 | 1.6207861645849661E+01  | 1.9535385939796150E+01  |
| H | 1.4378771115462895E+01 | 1.5088713713913645E+01  | -1.0686323066600554E+00 |
| H | 1.6157963992970672E+01 | 1.3902087165089684E+01  | 2.4761382497371822E+00  |
| H | 1.4766960113654294E+01 | 1.5032463439026980E+01  | 2.8951414913040465E+00  |
| H | 1.4927201795620961E+01 | 1.3243920243120352E+01  | 4.5052172910764676E-01  |
| H | 1.3758655842675426E+01 | 1.3056727604288440E+01  | 1.8944094007775203E+00  |
| O | 1.4408263921783902E+01 | 1.4516376641518072E+01  | 1.4186060453887478E+01  |

O 1.7161958940108370E+01 1.5278693993117800E+01 1.4191817840811947E+01  
C 1.6599069046395684E+01 1.4857406781799206E+01 1.2983315790292929E+01  
C 1.6578983760053656E+01 1.4651482423695480E+01 1.5302961159737333E+01  
C 1.5077067414287914E+01 1.4999318927543353E+01 1.5332501133731736E+01  
C 1.5034541218520591E+01 1.5058098697272218E+01 1.2968559934243949E+01  
H 1.4660806078346134E+01 1.4586423884733192E+01 1.6233020533605359E+01  
H 1.4942293288286335E+01 1.6087498152763310E+01 1.5374796022288084E+01  
H 1.7098452254177904E+01 1.4999188019558131E+01 1.6172234838376969E+01  
H 1.6720801385485490E+01 1.3547179642709434E+01 1.5222025722733003E+01  
H 1.4694719169596791E+01 1.4453109302721732E+01 1.2134933403738325E+01  
H 1.4729348062369947E+01 1.6133194825854090E+01 1.2801410076142187E+01  
H 1.6819879985178588E+01 1.3740952905244194E+01 1.2893093864436160E+01  
H 1.7057829434054405E+01 1.5459904530995395E+01 1.2215287380743897E+01  
O 1.7780355987590067E+01 5.1573248531578111E+00 3.2597212759388712E+00  
O 1.7910880903447044E+01 2.7147981634660901E+01 5.3779745435129875E+00  
C 1.8293433195334519E+01 7.3904289728758554E+00 4.0221926854428753E+00  
C 1.8399851277836632E+01 5.7256782480031525E+00 5.6103058991262680E+00  
C 1.7662830579994985E+01 4.8207679540285557E+00 4.6597436206372542E+00  
C 1.7387705556693593E+01 6.5353300568314472E+00 3.1323603171377057E+00  
H 1.8028803208190340E+01 3.7708484336000958E+00 4.7665591361604775E+00  
H 1.657649374322926E+01 2.5120580936020350E+01 5.0415046603044642E+00  
H 1.8105217110135051E+01 2.5582574973541895E+01 6.6626886563421293E+00  
H 1.9536383533989913E+01 5.6210235690985044E+00 5.5772764668794306E+00  
H 1.7525331123335278E+01 6.8132823314194351E+00 2.0728378220444061E+00  
H 1.6332100859843976E+01 2.6824605538900308E+01 3.4618028709604167E+00  
H 1.9332197612073973E+01 7.2185947655148892E+00 3.7247991754324907E+00  
H 1.7936136025718373E+01 2.8542838975447637E+01 3.9168624036788406E+00  
O -1.2779064291201675E-01 1.5767584474786053E+01 1.9105620579774108E+01  
O 8.3759512033148598E-01 1.5025575691535940E+01 1.6033379576976727E+00  
C 2.9342660065534443E-01 1.6343014265988316E+01 1.3708587280959248E+00  
C 2.1563427714428204E+01 1.4504955880096425E+01 4.4231197096990943E-01  
C 2.0638066288648020E+01 1.4449090526629460E+01 -7.1604217818581017E-01  
C -7.7032258940575430E-01 1.6240267052943707E+01 2.0328832187761865E+01  
H 2.1031689369706086E+01 1.4186919921598722E+01 1.8408986240517009E+01  
H 1.9821832335628986E+01 1.3706122731796411E+01 1.9577630380114865E+01  
H 2.1790788145483567E+01 1.3486503613532584E+01 6.9709644405694970E-01  
H 2.2460377295745968E+01 1.5066727862322567E+01 9.9200258950088813E-02  
H -1.1380635677122690E+00 1.7213002359892624E+01 2.0079825756061762E+01  
H -1.5481124720412442E+00 1.5595672135253404E+01 7.024727602581613E+01  
H 1.1000025487089149E+00 1.7018467319363740E+01 1.1103816082688855E+00  
H -2.0825073770461294E-01 1.6594013029825547E+01 2.2812833402431845E+00  
O 2.3459582042015356E+01 4.8925285034871226E+00 1.2166937442007589E+01  
O 8.0392758168431799E-01 5.9960589733295722E+00 1.0927641143043608E+01  
C 2.1115844265416627E+01 4.6361353695400691E+00 1.1417573843589953E+01  
C 2.2145456116275685E+01 6.6896341641532659E+00 1.1055513309029884E+01  
C 2.3052217590004805E+01 6.2459436834677158E+00 1.2237688482690585E+01  
C 2.2549576233477893E+01 4.2570207554123494E+00 1.1272243544006715E+01  
H 2.3884257707724252E+01 7.0464307220998705E+00 1.2279890782796024E+01  
H 2.3094934648989751E+00 6.3647250681741738E+00 1.3214760197687058E+01  
H 2.1906297453999343E+01 7.8147607670459234E+00 1.1222798203622524E+01  
H 2.2635032570719886E+01 6.6674796166845001E+00 1.0060381484725138E+01  
H 2.2951222983847622E+01 4.4667035111404125E+00 1.0244783732292239E+01  
H 2.5902653237739557E+00 3.1717097439328561E+00 1.1412302916077470E+01  
H 2.0469724791288193E+01 4.0329887768932648E+00 1.0735998858859160E+01  
H 5.8124178636027757E-01 4.5873889155227801E+00 1.2413244757158427E+01  
O 6.1089748042521448E+00 1.1942364414477559E+01 1.2060733208800082E+01  
O 7.8470909575780103E+00 1.3848841264146623E+01 1.3394305282944229E+01  
C 6.4117827050098946E+00 1.3818772399655375E+01 1.3468320756392108E+01  
C 8.2819265620985103E+00 1.2991433805236467E+01 1.2273728128357572E+01  
C 7.5193799534810832E+00 1.1647373439890417E+01 1.2160451937526879E+01  
C 5.7219486577614234E+00 1.2504741779159200E+01 1.3308226252372695E+01  
H 7.7424144507114070E+00 1.1092378566272384E+01 1.1245851477363191E+01  
H 7.7196064472553836E+00 1.1000052664076321E+01 1.3034171152727241E+01  
H 9.3329438818179931E+00 1.2782023283499901E+01 1.2487833075694299E+01  
H 8.3101269696503959E+00 1.3622116064940100E+01 1.1366100281000110E+01  
H 4.6248965286807717E+00 1.2677370441592705E+01 1.3173945744383589E+01  
H 5.9281732804604887E+00 1.1890763918262333E+01 1.4149590990338439E+01  
H 6.1425263459052912E+00 1.4483900937612537E+01 1.2616330999851357E+01  
H 6.1581824418461117E+00 1.4272948654825280E+01 1.4429095565350259E+01  
O 9.9959399914014497E+00 1.7719973334485378E+01 1.2638661824432779E+01  
O 1.2827441859453549E+01 1.7260194102209582E+01 1.3513429640436708E+01  
C 1.2336016077577685E+01 1.8514017034579467E+01 1.2942360464933985E+01  
C 1.1792544309559544E+01 1.6193317830362204E+01 1.3365438163485322E+01  
C 1.0405926143518418E+01 1.6693019931867752E+01 1.3577888553450641E+01

|   |                         |                         |                         |
|---|-------------------------|-------------------------|-------------------------|
| C | 1.0789550174038082E+01  | 1.8828279775751128E+01  | 1.3015891558227622E+01  |
| H | 9.7533670733029556E+00  | 1.5823706059169925E+01  | 1.3375309931877576E+01  |
| H | 1.60036767597180731E+01 | 1.6901025417898364E+01  | 1.4587369259032657E+01  |
| H | 1.2106094721892491E+01  | 1.5434008118372319E+01  | 1.4064929271892630E+01  |
| H | 1.1971738826649821E+01  | 1.5934646558264561E+01  | 1.2298028145187267E+01  |
| H | 1.0641381028502298E+01  | 1.9662879162740126E+01  | 1.2288710229700461E+01  |
| H | 1.0587390677171060E+01  | 1.9008827816817156E+01  | 1.4096075232429117E+01  |
| H | 1.2556225958877969E+01  | 1.8515836038703263E+01  | 1.1861586370698719E+01  |
| H | 1.2922297364614767E+01  | 1.9263940246733640E+01  | 1.3437894870345341E+01  |
| O | 1.6152896849829236E+01  | 1.1152834380193081E+01  | 1.5611964565595388E+01  |
| O | 1.5531299012191290E+01  | 8.5486912804993782E+00  | 1.4458771313996417E+01  |
| C | 1.6567939955948841E+01  | 8.7369269019524989E+00  | 1.5432702234290309E+01  |
| C | 1.5452523137086015E+01  | 9.7542865285625293E+00  | 1.3653418599248678E+01  |
| C | 1.5161127079412813E+01  | 1.0980207804316235E+01  | 1.4562931855765058E+01  |
| C | 1.6204828063778404E+01  | 9.8755971407634568E+00  | 1.6393707914945590E+01  |
| H | 1.5276416431689157E+01  | 1.1896529671902030E+01  | 1.3987093342282957E+01  |
| H | 1.4178156546611568E+01  | 1.0795555952402895E+01  | 1.5041158131246522E+01  |
| H | 1.4619938225862967E+01  | 9.5806677185388764E+00  | 1.2954784106638453E+01  |
| H | 1.6360429185965042E+01  | 9.8756298088572780E+00  | 1.3072239392456765E+01  |
| H | 1.6877678593640614E+01  | 1.0125169033987239E+01  | 1.7161418133799796E+01  |
| H | 1.5267934557184109E+01  | 9.7009811849995540E+00  | 1.6888855237740316E+01  |
| H | 1.7502857723821762E+01  | 8.9229089080762751E+00  | 1.4889554778330981E+01  |
| H | 1.6676674476836126E+01  | 7.7986105104089667E+00  | 1.5911740521338748E+01  |
| O | 7.6512716587768512E+00  | 2.1455272992652478E+01  | 6.1550116493926721E+00  |
| O | 9.5139772954119728E+00  | -3.1526438293062059E-01 | 4.7371629714126904E+00  |
| C | 9.9592145130889183E+00  | 4.8326799968805284E-01  | 5.8093666570757554E+00  |
| C | 8.3798849770273538E+00  | 2.0419222451719998E-01  | 4.0814198628213623E+00  |
| C | 7.1665273110840326E+00  | 5.5090051364093262E-01  | 4.9728318537663636E+00  |
| C | 8.7763866654651892E+00  | 7.1279717849619406E-01  | 6.8161303447390784E+00  |
| H | 6.3931745776133297E+00  | 2.1287274350348486E+01  | 4.4987886927817780E+00  |
| H | 6.6635349517803100E+00  | 1.9725808343731032E+01  | 5.3981363421314823E+00  |
| H | 7.9880518965595106E+00  | -5.6807060233629658E-01 | 3.3938053261907273E+00  |
| H | 8.6774646772176407E+00  | 1.0997809634850415E+00  | 3.4721487919830092E+00  |
| H | 9.1212341787932090E+00  | 2.1462996263944373E+01  | 7.6665838643021580E+00  |
| H | 8.4706856928293526E+00  | 1.9833889595595593E+01  | 7.2310555011987301E+00  |
| H | 1.0271536618370835E+01  | 1.5391185036000774E+00  | 5.5001592589455717E+00  |
| H | 1.0839053862233595E+01  | 5.9231163274465953E-02  | 6.2959953357618703E+00  |
| O | 1.8715759070419203E+01  | 9.7513444614605298E+00  | 1.9995900741134948E-01  |
| O | 1.7589698124461826E+01  | 1.2364579153189093E+01  | 1.2852280079535550E-01  |
| C | 1.8054191136833609E+01  | 1.1730498342698640E+01  | -1.0841142197701457E+00 |
| C | 1.8372365809484414E+01  | 1.1905701427873213E+01  | 1.2639200222051437E+00  |
| C | 1.8261304913142293E+01  | 1.0380366412014581E+01  | 1.4737353003356328E+00  |
| C | 1.7910305224790950E+01  | 1.0264479562428624E+01  | -8.9012117356995824E-01 |
| H | 1.8919960674727125E+01  | 9.9407466281103662E+00  | 2.2615101747157267E+00  |
| H | 1.7256750340485624E+01  | 9.9660481250739501E+00  | 1.6473802326272802E+00  |
| H | 1.8071191344482308E+01  | 1.2507775093138358E+01  | 2.1216189774953356E+00  |
| H | 1.9394977285670407E+01  | 1.2171281256804740E+01  | 9.9685292067141151E-01  |
| H | 1.8289122091128828E+01  | 9.7442279574110415E+00  | 1.8332650819192452E+01  |
| H | 1.6857292848889163E+01  | 9.9341745097854748E+00  | 1.9412741419428883E+01  |
| H | 1.9126097903460497E+01  | 1.1974511328457442E+01  | -1.3138426763025868E+00 |
| H | 1.7418171691444130E+01  | 1.2032147467448761E+01  | 1.8170658590220302E+01  |
| O | 8.1673862048711179E+00  | 5.1898610812675869E+00  | 1.6072031064497803E+01  |
| O | 5.840898016300840E+00   | 5.9405315936921905E+00  | 1.4769342448633278E+01  |
| C | 6.0872965359321434E+00  | 6.3417586124328915E+00  | 1.6168206565840375E+01  |
| C | 6.2876325782989326E+00  | 4.6171725272460025E+00  | 1.4628674365459007E+01  |
| C | 7.8017618573842773E+00  | 4.5689639927882872E+00  | 1.4857937820919220E+01  |
| C | 7.5577861841907090E+00  | 6.5470319079825341E+00  | 1.6285363058478683E+01  |
| H | 8.2988782071874549E+00  | 3.5647931913283388E+00  | 1.4896675676684753E+01  |
| H | 8.1829970542816284E+00  | 5.0985813607285717E+00  | 1.3973773194760275E+01  |
| H | 6.1162281427202299E+00  | 4.4010361665769686E+00  | 1.3540862118692479E+01  |
| H | 5.6411422620136484E+00  | 3.9052975325641679E+00  | 1.5147215141043167E+01  |
| H | 7.7935026698788201E+00  | 6.8503642937592248E+00  | 1.7338583769364259E+01  |
| H | 8.0083076087560450E+00  | 7.2473735502028998E+00  | 1.5566803165035365E+01  |
| H | 5.5799106615141687E+00  | 5.6339678758346459E+00  | 1.6807578600244465E+01  |
| H | 5.5024215970816517E+00  | 7.2720339489244656E+00  | 1.6273593981750484E+01  |
| O | 1.1053947390181502E+01  | 1.0814822416845137E+01  | 1.0721503122925792E+01  |
| O | 1.2788934619912677E+01  | 1.3006084028722947E+01  | 1.0835546110782563E+01  |
| C | 1.2243583428100795E+01  | 1.2603880325933813E+01  | 9.6243197830151903E+00  |
| C | 1.2984820552625951E+01  | 1.1956583576904633E+01  | 1.1783825924860013E+01  |
| C | 1.1670239059566857E+01  | 1.1128737107778136E+01  | 1.1940672546108509E+01  |
| C | 1.0879376786032328E+01  | 1.1947821710227261E+01  | 9.7334424652584008E+00  |
| H | 1.1874201357196743E+01  | 1.0124896651049644E+01  | 1.2402689507257302E+01  |
| H | 1.0992357808392939E+01  | 1.1692094523742421E+01  | 1.2663176105554951E+01  |
| H | 1.3294737637037816E+01  | 1.2436021274620417E+01  | 1.270198899799779E+01   |

H 1.3775341482900320E+01 1.1273177898389696E+01 1.1427004689780007E+01  
H 1.0476076132782639E+01 1.1374259023566010E+01 8.8618396384589815E+00  
H 1.0113587565480769E+01 1.2703638554767087E+01 1.0032385977511328E+01  
H 1.2952093259411996E+01 1.1888102642775085E+01 9.2156237194508552E+00  
H 1.2146261473652791E+01 1.3497546969063350E+01 8.9798296216850098E+00  
O 1.0496282709711936E+01 1.2604485172948042E+01 1.5164391206576015E+01  
O 1.1493149290923462E+01 1.3257030627135052E+01 1.7736893412416688E+01  
C 1.0100948349736125E+01 1.3370284044527549E+01 1.7390958381257466E+01  
C 1.2303406546817991E+01 1.3453770981833648E+01 1.6584743714074062E+01  
C 1.1957147388763310E+01 1.2458697380057366E+01 1.5496048905907124E+01  
C 9.6787771225512582E+00 1.2348385691631275E+01 1.6331220501718231E+01  
H 1.2440710211699333E+01 1.2723981607099740E+01 1.4553493331107051E+01  
H 1.2078812894801088E+01 1.1359067039195644E+01 1.5804072115306491E+01  
H 1.3345720689117394E+01 1.3259329301206078E+01 1.6915462377455604E+01  
H 1.2225143726130435E+01 1.4462223191205656E+01 1.6184809204201308E+01  
H 8.6451562022288719E+00 1.2486302275036376E+01 1.6007748166258381E+01  
H 9.7137845355480881E+00 1.1276748734427194E+01 1.6658060475659820E+01  
H 9.9231453728693744E+00 1.4464969063345146E+01 1.7012109796630106E+01  
H 9.5495182619519685E+00 1.3201978861650485E+01 1.8355303463301386E+01  
O -2.2917672094791053E-01 1.4362414888093907E+01 6.6887287246400771E+00  
O 2.3201544095907227E+00 1.4666910729786061E+01 7.9444606704141725E+00  
C 1.3379731015668832E+00 1.3670672524894071E+01 8.3629903357593012E+00  
C 1.6358199133218077E+00 1.5768672524714473E+01 7.2967715279781835E+00  
C 8.1455922123722324E-01 1.5219483774413664E+01 6.2269128943107930E+00  
C 4.4809830837897546E-01 1.3188014227361268E+01 7.2595396819869036E+00  
H 3.5421795909631593E-01 1.5943529702929208E+01 5.5267200959741922E+00  
H 1.4786446961974222E+00 1.4472598405411111E+01 5.7072884499162617E+00  
H 2.3129587699514826E+00 1.6567881061968905E+01 6.9264322513610956E+00  
H 9.0765684751481712E-01 1.6244703206879972E+01 7.9805459056750943E+00  
H -3.9600063106186639E-01 1.2552677815405969E+01 7.7218198300382674E+00  
H 9.6841337625177548E-01 1.2640415840160639E+01 6.4391471742407500E+00  
H 7.6742361795900549E-01 1.4074332954174228E+01 9.2352133210453324E+00  
H 1.9454442492124302E+00 1.2831231721337788E+01 8.8110494006256879E+00  
O 2.8635792984562563E+00 1.7346492662215102E+01 3.1319118400144217E+00  
O 5.5511654303082514E+00 1.6974721141408956E+01 4.0320908273006193E+00  
C 5.2541326503672705E+00 1.7773364136514292E+01 2.8511046460260983E+00  
C 4.5486516725947119E+00 1.5901925409340679E+01 4.1865187537089863E+00  
C 3.2349167770152487E+00 1.6546010866469143E+01 4.3496385025806115E+00  
C 3.7998185374898861E+00 1.8366519764929166E+01 3.0418765005017763E+00  
H 2.4465987709318071E+00 1.5783994874492777E+01 2.4603625613170426E+01  
H 3.3579693115536986E+00 1.7141635728883458E+01 5.2757726040776820E+00  
H 4.7496092360903690E+00 1.5373824571250230E+01 2.5210379640416889E+01  
H 4.5652628715725427E+00 1.5161970315822188E+01 2.3466602297437479E+01  
H 3.5258336853649137E+00 1.9064717846236086E+01 2.2470495851903465E+00  
H 3.7822785194403572E+00 1.9014842575809848E+01 3.9662512963125662E+00  
H 5.1565144024740643E+00 1.71463440999810278E+01 1.9600031184374862E+00  
H 6.0082285742158446E+00 1.8553118400604308E+01 2.9430536768861768E+00  
O 1.5062421457304247E+01 1.8965857240252966E+01 -1.4814339191416417E+00  
O 1.5110109139435403E+01 1.9930234547187133E+01 -4.1714445640074986E+00  
C 1.5609668699276844E+01 2.0687618273120826E+01 -3.0741400355222712E+00  
C 1.4079374264306352E+01 1.9035100482404800E+01 -3.7376812996398510E+00  
C 1.4495262769326022E+01 1.8126182831949109E+01 -2.5238970436329757E+00  
C 1.6116832539260169E+01 1.9744659657625800E+01 -1.9615438134425858E+00  
H 1.3675391653966944E+01 1.7572283462951759E+01 -2.0423427368519711E+00  
H 1.5297029782308210E+01 1.7416899831740263E+01 -2.8709941065020388E+00  
H 1.3711468186429608E+01 1.8470280112015619E+01 -4.6040732996698850E+00  
H 1.3267956675979942E+01 1.9667248256865765E+01 -3.3390138778163503E+00  
H 1.6499122922843352E+01 2.0315701873907294E+01 -1.0761442406181752E+00  
H 1.6919595462708195E+01 1.9098679410157555E+01 -2.3719402593526282E+00  
H 1.4788248568608461E+01 2.1219129649299795E+01 -2.5466466736232398E+00  
H 1.6304591078363902E+01 2.1397346664904873E+01 -3.5000748999736175E+00  
O 4.6695977125209903E-01 -1.2915328966963552E-01 7.8989528618991924E+00  
O 1.5807250007506306E+00 2.2475974956895733E+01 8.7879748655747125E+00  
C 1.9067430678639135E+00 1.1861019558645267E+00 9.4966355121068489E+00  
C 3.8001180418979352E-01 2.2433484182692571E+00 7.9467880910639508E+00  
C 4.2692789410729820E-01 1.0581129083829597E+00 7.0963261032738094E+00  
C 1.7492673368207508E+00 -6.8871322137136676E-02 6.5589639455234341E+00  
H -5.0165407128861705E-01 1.0005804934604190E+00 6.5368400355374838E+00  
H 1.3681512469064201E+00 1.1530127954657137E+00 6.5083944642798093E+00  
H 2.9612768932374312E-01 3.2099659397440017E+00 7.4471580775317046E+00  
H -5.6874556518616304E-01 2.1762227440313984E+00 8.5462685892424233E+00  
H 1.6781811541855096E+00 -9.8871450132831273E-01 9.2255147537697972E+00  
H 2.4806916527164655E+00 -1.7137295428422811E-01 7.7356038924272452E+00  
H 1.3364009226464804E+00 2.1079558634880414E+01 1.0433046271474296E+01

H 2.9753073250713920E+00 2.1305688787160047E+01 9.8594710225224169E+00  
O 1.5301099844819346E+00 8.7990967545686111E-02 6.3181960784346225E-01  
O -1.1328499598434105E+00 5.8986344882975938E-01 -2.7217484023640354E-01  
C 2.0163313698685513E+01 9.5756924091573770E-01 -9.7731193428021967E-01  
C -8.1828513981178663E-01 5.2536275845445102E-01 1.1389625476021998E+00  
C 4.4337588438531017E-01 -2.7178129415766511E-02 1.4465110215955046E+00  
C 2.1308407333584576E+01 2.3776479883782051E-02 -7.3976660762471891E-01  
H 7.2459747488920112E-01 -8.1726727392088638E-02 2.4792067296275273E+00  
H 2.3036261954325951E-01 -1.3556407364024570E+00 1.2691676999107775E+00  
H -1.7109188654523972E+00 1.2396067652007754E-01 1.7306568892381939E+00  
H -7.6761277048290355E-01 2.1684657304018078E+01 1.4828685705913354E+00  
H 2.2104635287420702E+01 3.1071550035223722E-01 -1.4395391295615316E+00  
H 8.7246454054361866E-01 -9.9647501377079128E-01 -1.0491353680633277E+00  
H 2.0463130026137364E+01 1.9864787985473602E+00 -7.5252688765602860E-01  
H 1.9840878018071582E+01 9.1273665478506183E-01 -2.0090372381764436E+00  
O 4.5022878963660196E+00 1.7090732795664703E+01 1.5930218199706610E+01  
O 3.7532067244368927E+00 1.5004709087527702E+01 1.7759944738555422E+01  
C 4.5672786370176954E+00 1.6129307014780590E+01 1.8200866327575071E+01  
C 3.9810582751426837E+00 1.4880954559833345E+01 1.6381986891098911E+01  
C 3.7646307436421069E+00 1.5992128012567509E+01 1.5430385335156155E+01  
C 4.3494193773183527E+00 1.7331897870972565E+01 1.7366308184640335E+01  
H 4.2639558499659831E+00 1.5653157123534523E+01 1.4526880597634165E+01  
H 2.7900557816379874E+00 1.6300050041648706E+01 1.5166629359122842E+01  
H 3.2955793086666811E+00 1.4012447477385841E+01 1.6026752525331133E+01  
H 5.0869761529822570E+00 1.4502196046729948E+01 1.6279783600298142E+01  
H 5.1394454558247551E-00 1.8065286119742211E+01 1.7620066604102227E+01  
H 3.3844025343128359E+00 1.7818336214075408E+01 1.7524918853941976E+01  
H 5.5702084443534137E+00 1.5775890178183809E+01 1.8081423347489949E+01  
H 4.3474134693636408E+00 1.6430122420250189E+01 1.9231904281837807E+01  
O 1.2893888125460411E+01 3.7211606525871281E+00 1.5026379070115913E+01  
O 1.3140102142079511E+01 2.2446748093735440E+01 1.2619218321633292E+01  
C 1.1939036143260104E+01 2.2378174661964323E+01 1.3431338427930635E+01  
C 1.4224158151384970E+01 2.2813558989514000E+01 1.3411018064223619E+01  
C 1.4001993271065409E+01 3.9959208573169454E+00 1.4138979500690768E+01  
C 1.1781298409763551E-01 3.5806253495052389E+00 1.4162435261635821E+01  
H 1.4924635978266759E+01 4.2693113871559314E+00 1.4707380109170316E+01  
H 1.3715118575095016E+01 4.7930509472125236E+00 1.3481950886198815E+01  
H 1.5095178607147481E+01 2.2914959338598667E+01 1.2771453267431937E+01  
H 1.4423353089673745E+01 1.9779009124910802E+00 1.4220715972319301E+01  
H 1.0859223745721387E+01 3.5162941612759062E+00 1.4737364416072648E+01  
H 1.1694648088002307E+01 4.3872555625454170E+00 1.3454873400210952E+01  
H 1.2047869788090976E+01 2.1574175881518784E+01 1.4215210516057315E+01  
H 1.1140498488354154E+01 2.2170844900233870E+01 1.2692933632349101E+01  
O 3.3385221944567983E-01 1.3855818316566436E+01 1.2740127402374585E+01  
O 1.0046292395042777E+00 1.3118744298556122E+01 1.5417293311198350E+01  
C 1.1906290692058241E+00 1.2226990039552591E+01 1.4346212625463284E+01  
C -7.1571997210906138E-02 1.4051800496456295E+01 1.5134927292635869E+01  
C 2.1362995528818049E-01 1.4788115488360583E+01 1.3826033731993936E+01  
C 1.4596109361998775E+00 1.2990318346990447E+01 1.3055431159184405E+01  
H -6.3615796810479563E-01 1.5519113865824899E+01 1.3619574175667383E+01  
H 2.1245575638166287E+01 1.5359207255619420E+01 1.3880047027596879E+01  
H -7.0481553743597769E-02 1.4703162456266961E+01 1.6006342474059974E+01  
H -9.5629552973279364E-01 1.3476854336339285E+01 1.5094830718593784E+01  
H 1.6793123203285452E+00 1.2267118636107368E+01 1.2265405021162763E+01  
H 2.3737025127376468E+00 1.3557563845020734E+01 1.3184300893535676E+01  
H 3.4700365907203412E-01 1.1544135326303190E+01 1.4196155618635133E+01  
H 2.0112949012533434E+00 1.1550380674506691E+01 1.4653798096928501E+01  
O 1.6234845896973848E+01 8.1816873061635960E+00 1.0795757927206028E+01  
O 1.6046697288972695E+01 6.2934597479665886E+00 8.5020738984705932E+00  
C 1.6908597059217676E+01 7.4895006878863386E+00 8.5126435774574549E+00  
C 1.4905678311305994E+01 6.5275784559265615E+00 9.4642300000562685E+00  
C 1.5331252788417448E+01 6.9978909872872688E+00 1.0820006090354557E+01  
C 1.7342722063734847E+01 7.9467543028062222E+00 9.9190576881486106E+00  
H 1.4435005627870295E+01 7.2065195112419476E+00 1.1440514085037625E+01  
H 1.6007956459367161E+01 6.2944202325489513E+00 1.1304874948037202E+01  
H 1.4376603595861178E+01 5.5635947357686675E+00 9.5404059988851557E+00  
H 1.4231793463047991E+01 7.2732147029117034E+00 9.0457177561585826E+00  
H 1.7860295347364346E+01 8.9181607655586728E+00 9.8769276904799526E+00  
H 1.8025739523530465E+01 7.1533922913298333E+00 1.0391535128704003E+01  
H 1.6485484871932858E+01 8.4442009351121570E+00 8.0353012514072404E+00  
H 1.7714025350188106E+01 7.2237075506345336E+00 7.7918303267074593E+00  
O 9.8449096477118285E+00 1.4935333528189757E+01 3.4636692614344278E+00  
O 1.0323639084434408E+01 1.4309865094304556E+01 6.2821058752889485E+00  
C 1.1154584271384103E+01 1.3739241125105508E+01 5.2756573164421532E+00

|   |                         |                        |                         |
|---|-------------------------|------------------------|-------------------------|
| C | 9.0583416499060156E+00  | 1.4601520372274120E+01 | 5.7657316138832986E+00  |
| C | 9.1138827024687732E+00  | 1.5598062022204369E+01 | 4.5805625516324620E+00  |
| C | 1.1186901148506779E+01  | 1.4654855932861302E+01 | 3.9620241602540789E+00  |
| H | 8.1044758865546456E+00  | 1.6003858392888514E+01 | 4.2904136989233805E+00  |
| H | 9.7007165589921893E+00  | 1.6501128619618243E+01 | 4.8953852453097806E+00  |
| H | 8.4923035628634267E+00  | 1.5086553063183729E+01 | 6.5661646982069435E+00  |
| H | 8.5824483014046216E+00  | 1.3713247344062811E+01 | 5.4133147757210862E+00  |
| H | 1.1617889620506384E+01  | 1.4221219384045641E+01 | 3.0858992521293516E+00  |
| H | 1.1785241508676330E+01  | 1.5556849157489326E+01 | 4.0879061379088695E+00  |
| H | 1.0754626577896977E+01  | 1.2772235917545682E+01 | 4.9086073941828721E+00  |
| H | 1.2129740816885471E+01  | 1.3724415741166258E+01 | 5.7613114694948129E+00  |
| O | 7.3714985305351233E+00  | 1.1008416120287052E+01 | 1.3638684988414453E+00  |
| O | 9.3550456701049463E+00  | 9.9656818445152009E+00 | 3.3025995554650431E+00  |
| C | 9.5584554311458554E+00  | 1.1219796261770906E+01 | 2.5108564976575307E+00  |
| C | 8.3377653734009876E+00  | 9.0854257227785151E+00 | 2.5856727980394583E+00  |
| C | 7.1320497885596117E+00  | 9.7937761369394760E+00 | 2.1830068098079716E+00  |
| C | 8.2184881826101535E+00  | 1.1908717789249405E+01 | 2.0914880300572189E+00  |
| H | 6.5536584628618186E+00  | 9.0613199872193579E+00 | 1.6237070842189412E+00  |
| H | 6.4834057174805810E+00  | 1.0127274594370283E+01 | 3.0350774937519018E+00  |
| H | 8.1916399912457845E+00  | 8.2683934779961152E+00 | 3.3018719304683812E+00  |
| H | 8.8657604075903809E+00  | 8.6042572773129926E+00 | 1.7202195376036808E+00  |
| H | 8.4634903515685238E+00  | 1.2638367183632660E+01 | 1.3200612406273862E+00  |
| H | 7.7975426323725836E+00  | 1.2396624304727229E+01 | 3.0068365087925231E+00  |
| H | 1.0039519157595235E+01  | 1.0901995733831587E+01 | 1.5252975494612846E+00  |
| H | 1.0189230579015041E+01  | 1.1792721959789441E+01 | 3.1949937726335826E+00  |
| O | 2.9593689635436840E+00  | 6.2038848095917061E+00 | 9.0421213134153178E-01  |
| O | 2.1566899940644660E+01  | 7.8916971306248618E+00 | 2.7442334785767510E+00  |
| C | 2.2157089010714945E+01  | 6.6319448953385596E+00 | 3.1490892263424151E+00  |
| C | 2.1308295433282936E+01  | 7.8191177802616618E+00 | 1.2783208619652224E+00  |
| C | 2.245212664377156E+01   | 7.4199285057003896E+00 | 4.4574037399259114E-01  |
| C | 2.3383743507301858E+01  | 6.2554076944912742E+00 | 2.2802524862227100E+00  |
| H | 1.9583290316283106E+00  | 7.2579597260864963E+00 | -5.5184419265157181E-01 |
| H | 2.3254387826939833E+01  | 8.1584062316542081E+00 | 4.2287931451858968E-01  |
| H | 2.0907868539020566E+01  | 8.8107663096031441E+00 | 1.0633117049508960E+00  |
| H | 3.7920647226256599E-01  | 7.0483748403534765E+00 | 1.0702000144087001E+00  |
| H | 3.5980288909313494E+00  | 5.2400710039533465E+00 | 2.5178270044441518E+00  |
| H | 2.4239801327105553E+01  | 6.9319688928497403E+00 | 2.4457683028839901E+00  |
| H | 1.4138694014360162E+00  | 5.7663210518901016E+00 | 3.0316842910309147E+00  |
| H | 2.2371013340442818E+01  | 6.6469891983780078E+00 | 4.2354055760470697E+00  |
| O | 3.5890694023938354E+00  | 4.1947423170493261E+00 | 1.6564858503746620E+01  |
| O | 9.2901273652765659E-01  | 2.3765971848885005E+01 | -2.7487707054839827E+00 |
| C | 2.0517929345179029E+00  | 2.3831758182608208E+01 | -1.8324662857609515E+00 |
| C | 1.4042297490242748E+00  | 3.1561149700758167E+00 | -4.0331025452200722E+00 |
| C | 2.5465304683459364E+00  | 4.0099081098223666E+00 | -4.5338078625478273E+00 |
| C | 3.0253360064162105E+00  | 4.7289345402420917E+00 | -2.3725445062488522E+00 |
| H | 2.3191799152531093E+01  | 3.4963166366804188E+00 | 1.4781854644901831E+01  |
| H | 2.3196492451129784E+00  | 5.0403589778754574E+00 | -4.9283277504429464E+00 |
| H | 2.0655739048847362E+01  | 3.0632396102498105E+00 | -4.7338717035447759E+00 |
| H | 2.1829338071578153E+01  | 2.2181222665637890E+01 | 1.6258666141372903E+01  |
| H | 3.8265757471331510E+00  | 4.8922441711122637E+00 | 1.8523270005853078E+01  |
| H | 2.5066915912090884E+00  | 5.6041343092174971E+00 | -2.6258126250379910E+00 |
| H | 2.6235452960271863E+00  | 2.2860873178921359E+01 | 1.8343574999745346E+01  |
| H | 1.6998059936156464E+00  | 2.4098719661310930E+01 | -8.4900618608275880E-01 |
| O | -1.7437813093366097E+00 | 1.7385689713655463E+01 | 3.8232261125268470E+00  |
| O | -3.4232174558676611E+00 | 1.7321332077451512E+01 | 6.1747737662156181E+00  |
| C | -3.6080835147103101E+00 | 1.6338229277780250E+01 | 5.0785856707645882E+00  |
| C | 1.7064866722395301E+01  | 1.8550527813093787E+01 | 5.5281205415678913E+00  |
| C | 1.8426173450442903E+01  | 1.8362145657464740E+01 | 4.8735741801531711E+00  |
| C | -2.3617917504978840E+00 | 1.6162291099895903E+01 | 4.2199953278270357E+00  |
| H | 1.8899340397542378E+01  | 1.9237899905276823E+01 | 4.4382225233713468E+00  |
| H | 1.9063267326191912E+01  | 1.8051992267170732E+01 | 5.6900563811215266E+00  |
| H | 1.7156456809781737E+01  | 1.9367415957287434E+01 | 6.2928729668731753E+00  |
| H | 1.6380528548730688E+01  | 1.8870234049836075E+01 | 4.7472506371653100E+00  |
| H | -2.6649536879373095E+00 | 1.5682793503599651E+01 | 3.2696042482088643E+00  |
| H | -1.6092188841505650E+00 | 1.5546512180160999E+01 | 4.7482566207874033E+00  |
| H | -4.3551581752302306E+00 | 1.6821353340288983E+01 | 4.4887795506491521E+00  |
| H | -3.9227878663877340E+00 | 1.5415830499643466E+01 | 5.6149480491495289E+00  |
| O | 2.2923028489829087E+00  | 1.1298609939906507E+01 | 2.2238151556462487E+01  |
| O | 4.3593388064061127E+00  | 1.2474831879489216E+01 | 3.6294719998296667E+00  |
| C | 2.9305222163392157E+00  | 1.2741249209750199E+01 | 3.9971783784490658E+00  |
| C | 4.4649094871281747E+00  | 1.2318850780363375E+01 | 2.1790380340704369E+00  |
| C | 3.7073182598805574E+00  | 1.1110076945542694E+01 | 1.8409240250463501E+00  |
| C | 2.0012124240425608E+00  | 1.1664393170016568E+01 | 3.4752436770511550E+00  |
| H | 3.6826638227395447E+00  | 1.0849322455878784E+01 | 7.4449962365781919E-01  |

|            |                         |                         |                         |
|------------|-------------------------|-------------------------|-------------------------|
| H          | 4.1112655027139544E+00  | 1.0176257363666508E+01  | 2.2427074424941917E+01  |
| H          | 5.489035768837052E+00   | 1.2064348233497078E+01  | 2.0502066849830411E+00  |
| H          | 4.2860815249173101E+00  | 1.3277921536538681E+01  | 1.5761597180585691E+00  |
| H          | 2.1041108163184745E+01  | 1.1982579512137262E+01  | 2.3624544129442761E+01  |
| H          | 2.0165102595991939E+00  | 1.0763715684917802E+01  | 2.4233730740522127E+01  |
| H          | 2.2787167462089720E+01  | 1.3753919839859174E+01  | 3.6976727784523371E+00  |
| H          | 2.3061882358249534E+01  | 1.2681838495141452E+01  | 5.1065895875262637E+00  |
| O          | 7.3162416118911668E+00  | 1.7590562725612287E+01  | 7.7876911129224338E+00  |
| O          | 6.2033307868278618E+00  | 1.5659416007333439E+01  | 9.4994670729117452E+00  |
| C          | 7.6466944687844070E+00  | 1.5961827664532910E+01  | 9.5561559547807811E+00  |
| C          | 5.5323926032575450E+00  | 1.6018429720467957E+01  | 8.2997824500919126E+00  |
| C          | 5.8622000323475127E+00  | 1.7399558447082427E+01  | 7.8967756662353743E+00  |
| C          | 7.9484571456556967E+00  | 1.7375766228986627E+01  | 9.1086920439573138E+00  |
| H          | 5.3864064132100751E+00  | 1.7618709012985281E+01  | 6.9069230861387947E+00  |
| H          | 5.4934683339143291E+00  | 1.8237108658418862E+01  | 8.5148833269015594E+00  |
| H          | 4.4450387152733288E+00  | 1.5892185671622274E+01  | 8.4860976224321814E+00  |
| H          | 5.8088592619517962E+00  | 1.5373599812125043E+01  | 7.4197868649723659E+00  |
| H          | 9.0334952991115465E+00  | 1.7527921850889680E+01  | 9.0040819605049656E+00  |
| H          | 7.5645345146573062E+00  | 1.8172081140638795E+01  | 9.7670955710855321E+00  |
| H          | 8.2408568243225986E+00  | 1.5257233379802058E+01  | 8.9045641619238936E+00  |
| H          | 7.9681246792965910E+00  | 1.5764323632236254E+01  | 1.0596964170699293E+01  |
| O          | 9.8798006470105744E+00  | 2.1776167133592428E+00  | 1.9182155162137924E+01  |
| O          | 1.1265153509794933E+01  | 1.6746348371129918E+00  | -3.3391554473686682E+00 |
| C          | 1.0840595117801442E+01  | 6.2811385155999633E-01  | -2.5050351388027861E+00 |
| C          | 1.1577290642418093E+01  | 2.8607409565965427E+00  | -2.4587391965503143E+00 |
| C          | 1.0353028115939958E+01  | 3.3383013089659928E+00  | -1.7557428889101709E+00 |
| C          | 9.5274892974506891E+00  | 1.0728739901975168E+00  | -1.8495085542859167E+00 |
| H          | 1.0637492053645925E+01  | 4.0662866152833201E+00  | 1.9063019732065332E+01  |
| H          | 9.6305546861446558E+00  | 3.6799038331599512E+00  | -2.4566597227052323E+00 |
| H          | 1.1984530665543579E+01  | 3.6096590462561777E+00  | -3.1294724449870595E+00 |
| H          | 1.2346486734625207E+01  | 2.4841052088745808E+00  | 1.8339262335181136E+01  |
| H          | 9.0247055523653117E+00  | 2.0449303906832125E+01  | -1.1910095501754243E+00 |
| H          | 8.7305014629029625E+00  | 2.1444670489211052E+01  | -2.5401292841694487E+00 |
| H          | 1.1585162375812802E+01  | 2.8263251513793114E-01  | 1.8327055860820924E+01  |
| H          | 1.0654074802128717E+01  | -2.3785594609338886E-01 | -3.1574846179683655E+00 |
| O          | 6.0796598605527032E+00  | 2.3206086208828883E-01  | 1.3789373708593123E+01  |
| O          | 6.9317097294881078E+00  | -1.0057450114574709E+00 | 1.6284156374359451E+01  |
| C          | 6.2566300961842032E+00  | 2.3099797881930009E-01  | 1.6267235528064234E+01  |
| C          | 7.5965409977973488E+00  | -1.1838844597023273E+00 | 1.5023295661284701E+01  |
| C          | 6.6930429181298035E+00  | -1.0811582742683761E+00 | 1.3741310817259532E+01  |
| C          | 5.3157063582107602E+00  | 3.2668279629615216E-01  | 1.4989302158593716E+01  |
| H          | 7.2625562536620238E+00  | 1.8826663759891019E+01  | 1.2827754152550128E+01  |
| H          | 6.0237217452326837E+00  | -1.9482547811474797E+00 | 1.3860516260271517E+01  |
| H          | 8.1017376037301254E+00  | -2.1633208412875948E+00 | 1.5035863488348360E+01  |
| H          | 8.3433611177264950E+00  | 1.9737506913789947E+01  | 1.4980174133796309E+01  |
| H          | 4.7947579771717361E+00  | 1.2729363124894497E+00  | 1.5024081218944856E+01  |
| H          | 4.6044783051415550E+00  | -4.3208262461418595E-01 | 1.5073207814146549E+01  |
| H          | 6.908020235835232E+00   | 1.1074183955698682E+00  | 1.6277982698278425E+01  |
| H          | 5.6564720499632308E+00  | 3.7674712841600161E-01  | 1.7168069114953830E+01  |
| O          | 1.7531814912045590E+01  | 5.2258136993821083E+00  | 1.8294175891247210E+01  |
| O          | 1.5983788053466448E+01  | 3.2400888296098911E+00  | -9.2967088850550772E-01 |
| C          | 1.5403804416007045E+01  | 4.5167580838004753E+00  | -1.2979008787133841E+00 |
| C          | 1.7237469816525383E+01  | 3.4121003710131896E+00  | -2.4331772244251715E-01 |
| C          | 1.8143761965518124E+01  | 4.0146169854659952E+00  | 1.8873750757646242E+01  |
| C          | 1.6303225237144719E+01  | 4.9577218297787127E+00  | -2.3580868419959264E+00 |
| H          | 1.9050256791089407E+01  | 4.4546911011511110E+00  | 1.9256086046457845E+01  |
| H          | 1.8386948585378224E+01  | 3.3667071575599437E+00  | -2.0213437340985578E+00 |
| H          | 1.7533466363818022E+01  | 2.2545155121905076E+01  | 1.4092087948475315E-01  |
| H          | 1.7024737603685246E+01  | 2.4113430582953669E+01  | 6.9232225426742200E-01  |
| H          | 1.6044623432570447E+01  | 5.7998794132036879E+00  | -2.9993755408550862E+00 |
| H          | 1.6370148112464523E+01  | 4.1044560019917169E+00  | -3.0979313972675846E+00 |
| H          | 1.5440829722405564E+01  | 5.2031300941442895E+00  | -4.3249382809059439E-01 |
| H          | 1.4379740657725211E+01  | 4.3680249363992898E+00  | -1.7255856643036438E+00 |
| O          | -3.9147000434105670E+00 | 1.8472439249801017E+01  | 9.5284319041802021E+00  |
| O          | 1.7262867773789466E+01  | 2.0236691468715474E+01  | 1.1451443605488404E+01  |
| C          | 1.8105570829889562E+01  | 1.9363945580506165E+01  | 1.0664692311391427E+01  |
| C          | 1.5911621789282343E+01  | 1.9690782136461493E+01  | 1.1586594582332403E+01  |
| &END COORD |                         |                         |                         |
| &VELOCITY  |                         |                         |                         |
|            | -4.0552672350994006E-05 | -1.1982398589402730E-05 | -9.7084054701911940E-05 |
|            | -2.7915314413055588E-04 | -3.7207510174458756E-04 | 1.2217346790637947E-04  |
|            | -1.7033120864699916E-05 | 5.7961870554707604E-06  | -5.2580627469926759E-06 |
|            | -5.3043117877071609E-05 | -1.0306549589074942E-04 | 2.0356729786785135E-04  |
|            | -2.7640252705035689E-04 | 2.6957237726980750E-04  | -9.2329833366025903E-05 |

-2.5460845794310539E-04 -3.0010123350383868E-05 1.8964922470363191E-04  
-2.3723075489079038E-05 2.6322209594234914E-04 2.2703687437488436E-04  
-1.3833881635516205E-04 2.9320308880804026E-04 2.0241503314817245E-04  
1.6263538278929831E-04 -2.0531659483166777E-04 6.2329471800154835E-06  
-9.6868070613101253E-07 3.7188343794603728E-04 8.7968317004526587E-05  
-2.9144862474276114E-04 -2.3398761783802256E-04 1.1176234871655779E-06  
-1.0001014638315988E-04 1.6413766081324212E-04 5.2324275431722060E-04  
-2.2407425843082058E-04 -2.5545780693817958E-04 -4.9998176095117743E-04  
3.2108340610484870E-04 -7.4367497847341031E-05 -2.6012842725043418E-04  
1.3793040669555091E-04 -1.4094387109817814E-04 4.0827605014517480E-04  
-2.2693900401464563E-04 -3.1591154474952841E-04 -2.8840926395146637E-04  
9.1136517883895263E-05 -9.3421083140721490E-07 -3.1824244376522096E-04  
-1.5046452142394568E-05 3.2635773245829095E-04 -4.2699611695436418E-04  
-2.9018501457588741E-04 3.3979067501634216E-04 3.3947418339352077E-05  
6.1765982402194047E-05 -5.7277030619918704E-05 2.4718935093951018E-04  
-2.0542561499676564E-04 -9.7180430020620229E-05 9.4630373166100065E-05  
-4.3578573806710510E-04 -2.2279416610719376E-04 3.1095368557671588E-04  
-8.6982866206060340E-04 5.8419224577632765E-04 1.3245036203369810E-04  
-4.8837181893730949E-04 7.7636920511598410E-05 7.83274495141517600E-04  
4.2231569155426967E-04 1.6633060154148870E-04 -7.0762650026894665E-04  
-6.8005482400539379E-04 1.3999608291786082E-04 -5.6439011590442604E-04  
-1.0144599291277820E-03 -1.3296304678208346E-04 -3.8469144382855338E-04  
-2.0575669796900518E-04 -2.7456432171920080E-04 -1.0191972520013316E-03  
-4.8299413858404099E-04 -9.2089531398206748E-04 9.2519219887966491E-05  
-7.7052730972529111E-04 3.7173244894686043E-04 -2.2640131193157572E-04  
2.0154679601854436E-04 -6.0965610996611584E-04 -2.3443854167588463E-04  
3.6832623620119877E-04 -4.1400526657726027E-04 -7.0224335139484450E-04  
2.4019492026898599E-04 1.1829921421824021E-04 1.0241965284395113E-03  
-4.4808625170810016E-04 5.4333751259874803E-04 1.7444240524263525E-05  
5.0131996492704058E-04 1.0294785345724700E-04 -3.0797023460852832E-04  
-4.1789773306858866E-04 2.5181357820022894E-04 -1.1193825765331159E-03  
-3.9605288123129256E-04 1.0457042447262305E-04 2.7147451299424269E-04  
1.0768015307707436E-04 1.4230932375439570E-03 1.0401661173094390E-03  
-5.0391283574788542E-04 -1.6207877327752791E-04 5.9461254430791477E-05  
4.2667442862972111E-04 -1.5842080523711558E-04 -1.2326369917025105E-04  
-1.5119553634657711E-04 -1.0689950967604117E-04 4.9498455838036057E-04  
-5.1616112481708350E-05 7.4506679572426050E-05 -6.8862928391568340E-05  
2.5956531563030744E-04 3.3686584051499272E-04 -3.1883377448326742E-04  
-5.0622193617674361E-04 5.6348091438729710E-04 8.7411918108539312E-04  
-5.2832065956014433E-04 -6.9871664075852341E-05 3.2118424540933301E-04  
-8.8050255227944287E-05 1.2888521198444313E-03 -1.6794502907011800E-04  
2.9711492667594129E-04 -3.7222829516851187E-04 -2.6544574340154410E-04  
1.3945243876021119E-04 2.1561283277917237E-04 2.7740272604095300E-04  
-3.7709818809959826E-04 -6.8267210634504014E-04 -2.0049683450043074E-04  
-2.4223678962985131E-04 -8.1843178806941842E-04 -1.8835856155364241E-04  
4.8285472278909464E-05 -9.3411171859315181E-05 1.5386150372091316E-04  
1.6097341226532826E-04 3.3180408677155234E-04 7.5856631904008056E-05  
-2.4342463154581294E-04 -7.2951085254117363E-07 -6.0715002520827043E-05  
4.0769168855874871E-04 -6.4965872583362216E-04 -6.6821527817035979E-04  
-1.8506204066733468E-04 1.4182593274972058E-04 2.3620247711972361E-04  
-2.5423786283164526E-04 -7.9901870901677698E-05 -5.3103640718316591E-06  
-1.8626965857440750E-05 1.4969342309988147E-04 5.9080364752104758E-05  
-4.4486840156499421E-04 6.0752974388904812E-04 -1.3638827330792844E-04  
-3.0917839603277766E-04 -5.9530808220040306E-05 -3.5098374007814792E-05  
3.0556959812405278E-05 -3.3038438904601662E-04 1.6177783962903518E-04  
-6.9851151275782868E-04 5.5359209656858992E-04 -3.7443858796365687E-04  
-6.5655490379158069E-04 -1.1980113502382532E-03 9.7933066704587857E-05  
-4.7044829830747355E-04 3.4738400371343262E-04 8.4033265983782658E-04  
-3.3493378609567861E-04 -6.2848641310086779E-04 5.4455917044052488E-04  
3.9643027715100736E-04 1.0346949074731434E-03 4.4829618207395389E-04  
3.0659825158231015E-05 -2.3998373032805179E-05 -1.0864162921634708E-04  
8.0595836053137172E-05 2.1442812110100161E-04 -1.6369935567550514E-04  
9.3725614129461086E-05 1.5928789688793472E-04 -2.1681710055092924E-04  
-2.6718404234238812E-04 3.1260918191211589E-04 3.1237320571511569E-04  
3.0583228204142138E-04 2.2615759629209390E-04 1.5263127892604916E-05  
-1.6273786989129302E-05 8.9443845639896233E-04 1.4383801724952673E-04  
1.0744359999271386E-03 -7.0254972359129150E-04 -2.2304642434876247E-03  
-1.0854648039357396E-03 1.7274476573620419E-04 -3.3671325317298701E-04  
-9.5331860183957339E-04 5.2890913567851209E-04 2.3212732992054753E-04  
3.055492216994080E-05 4.8370074722006376E-04 1.5137109489715703E-03  
-4.0411399462726060E-04 7.6061915485948898E-04 -1.7432733946985704E-04  
-3.0768731755857623E-04 6.0433495095183973E-04 2.2411654468558549E-04  
1.5298064648470574E-03 4.8388443914644909E-04 2.0718208456219387E-04  
-4.2571050486154600E-04 -8.6722136621969622E-04 3.8177394115779565E-04



5.7601405556900514E-04 1.3746162672611134E-03 3.5428428016804269E-04  
-3.1481059406444385E-04 2.3764669412399498E-04 -6.8104312615800211E-04  
-3.0633798073336979E-05 4.4485835641479673E-04 -1.4624371249288314E-04  
-7.0194070688569935E-04 2.5944258725571668E-04 8.5444350184023200E-04  
-2.1693132858077425E-03 -4.8303399396937649E-04 -3.3325934145179281E-04  
-1.6104836619370579E-04 -3.4867737685060431E-04 2.7495885793894035E-05  
1.2997434447693299E-04 -6.8907124924148387E-04 -1.0621780204361003E-03  
5.2147949670554902E-04 -7.2641166726668399E-05 8.0377669257252480E-04  
6.7675518628988285E-04 1.7283463197656843E-04 -1.9372144420152826E-04  
-8.9234990739939994E-04 -4.1767549792310260E-04 -1.1708456099771836E-03  
-6.9574390935889610E-04 1.1542623897106401E-03 6.6062188180828071E-04  
1.0145866308256893E-05 2.5805495661634145E-04 1.2562171464929614E-04  
-3.1395136154700900E-04 6.3346973744804922E-05 -7.9631944849372011E-05  
-5.7243865455583901E-05 -4.4391347003411519E-04 3.8878475528062642E-05  
6.5336250015006014E-04 7.1503505355764528E-05 -2.4540672054285058E-04  
2.5480155782480569E-04 1.9512543148952706E-04 -1.7491029449234530E-04  
-7.0646372485828857E-05 -2.0188498169630906E-04 1.8501952322526273E-04  
2.8140927643660846E-04 8.2647650641112111E-05 1.5899788823209098E-04  
9.5179033832079672E-04 8.9906160338675835E-04 1.4345985732608274E-04  
-5.9803686804368688E-04 -5.4796535956787252E-04 5.3303320154807763E-04  
-4.4953117872079123E-04 2.0188701112264394E-04 -3.0289862930317284E-04  
7.2703477785010019E-04 2.5975476377927627E-04 1.4487519863786741E-03  
-5.0997951710915815E-04 -4.2644509055226514E-04 1.0885938984238105E-03  
-1.2366874321055926E-03 -8.4850654346452074E-04 2.7280073528172794E-04  
2.6630890544940972E-04 -5.6939716938360927E-04 -6.5296636106441778E-04  
3.0004238309053194E-04 1.8388614222839781E-04 1.4914399761558749E-04  
-2.5977549884121793E-05 2.5928739126365618E-05 -1.2580341314677896E-04  
4.7987411861863638E-05 -1.3273271779912175E-04 4.3641657951400290E-05  
1.0127134514685420E-04 6.8665746720767584E-05 2.4739558425999897E-04  
-1.0174067124025915E-04 -2.4728239299795090E-04 -4.7411056757858030E-04  
2.1426124650909578E-04 -2.9299155260378439E-04 -1.6985839103332272E-04  
-7.0068681140979391E-04 6.8344706727606580E-04 5.3860901263662981E-04  
1.9446479780850737E-04 7.2506171019985795E-04 3.3564932924360722E-05  
5.0865256182038563E-04 -9.9353191164850969E-04 -1.2628132424283209E-03  
-3.7211728578978321E-04 1.5424380085742881E-03 -1.7361033790818303E-04  
5.5019608879334754E-04 3.4654282940706763E-04 1.0371257260627792E-04  
1.6499268903715696E-04 9.6049245403067701E-05 -2.7575999535092087E-04  
-1.2566769296147159E-05 1.9756122329176565E-04 -7.7760298495984260E-04  
-4.1009207661483868E-05 -8.0821638724167422E-04 -1.6241209717971653E-03  
2.6039360760631908E-04 5.2998848553290923E-05 -8.5580901162606252E-05  
-8.3656938483156652E-05 -2.9787546901849783E-04 -3.8499250428410104E-05  
-2.5488448685854310E-04 3.2582324420699359E-04 -2.9156509623397904E-04  
1.8084432614741436E-05 3.0709676394537053E-04 8.0429119735910719E-05  
-5.1756449719003950E-05 -2.5221766982968304E-04 2.2078376680666556E-04  
-5.1312820207584603E-04 3.3360068814754045E-04 -3.1599236370076614E-04  
-7.3944430913022003E-04 2.8541044158177345E-05 1.1383676599861449E-03  
-6.1211150504643179E-04 -7.5616160688719890E-04 1.0518247818906310E-04  
-2.3636023093809511E-04 1.6705041101739010E-05 1.6251349016345919E-03  
8.4949506935789445E-04 -5.3840372104886429E-04 6.5619677231621798E-05  
2.9479791950694886E-05 -7.9142773296647916E-05 -3.3168266831925272E-04  
-5.9066196420398199E-04 1.6849199983671399E-04 9.3929025832262540E-04  
-8.4188204287870196E-04 -1.3048629834648260E-03 2.9991785531440645E-04  
3.6959580007495324E-04 -3.8235194238376110E-04 3.0383865535483292E-04  
-7.4484664568510142E-06 3.9027648327620340E-05 -2.0844408295273744E-04  
7.8455815728739432E-05 -1.4293903480199573E-04 -4.6314340863710837E-04  
1.8190821696112319E-04 -5.3982615595565367E-06 1.9802320887560539E-04  
2.2635749989657433E-04 -2.2361952539662325E-04 -3.4719872482641173E-04  
3.3529284994905715E-04 -2.8534875443685039E-04 -7.0726847588903536E-05  
4.5287453472715679E-04 -1.3021921064899160E-04 -2.2274839818806861E-04  
-9.1735768922186062E-04 -2.9883199788996917E-04 3.7618110627315657E-04  
-5.5728078440226098E-04 9.1117618264249605E-04 3.1378444361155212E-04  
-1.7630719840934015E-04 2.7695083355075292E-05 -9.5189536045996832E-04  
-3.0549363481226498E-04 -7.1859281428306328E-04 -4.5040889240399571E-04  
-1.1782978321866883E-03 -1.4737595048251338E-06 -1.9223029800850447E-03  
1.2665650337686705E-03 -1.8696764081118598E-04 -3.9806620145355754E-04  
-5.4937373925668053E-04 -5.5815463167076175E-04 -2.3899401278751973E-05  
-5.1529574216212693E-05 -2.1613357647767251E-04 -5.5131176298071861E-04  
-2.6298155735383552E-04 -2.5242036212520536E-04 7.6956644003165045E-05  
5.4557353673855555E-05 -8.5076068651234501E-05 2.2597319027285745E-04  
-1.0525659671279621E-04 -2.8717028876815880E-04 1.4434431118323212E-04  
2.2326410664006240E-04 1.3472395339501268E-04 -2.1737790986825367E-04  
3.6930961396677061E-04 -6.0973229910106482E-06 -9.9565718529159985E-05  
3.6303026548324453E-05 -3.5920256553702328E-04 -2.0329303538228882E-04  
-1.4623947088265900E-03 6.8365099151015474E-04 2.4165045555622907E-04

-2.4572404945987858E-04 -6.9243106605553731E-04 5.5981224482604981E-05  
7.7407627674719456E-04 1.1957041326442935E-03 1.0797975622941880E-03  
-6.1570604101779305E-04 6.7320387209010633E-04 -1.2352978623528584E-03  
7.3097859089949380E-04 -9.1061303777782764E-04 -1.4381348838505750E-03  
2.4794649568639360E-04 6.0831285674404868E-05 -7.4479154116437088E-04  
-5.0202814573842324E-04 1.0622471034059261E-03 -1.9650866889607728E-04  
1.2608960601160205E-03 4.8410881103614544E-04 -3.3575046209344134E-05  
3.8478021634994332E-04 1.5204480609956158E-04 2.4934730549625532E-04  
-3.5685607419985428E-06 7.1147173992326381E-05 1.5784594165289917E-04  
1.3648914713001886E-04 -1.5206946552541453E-04 3.2870581909173334E-04  
-2.9406236838709046E-04 -3.3615355650199933E-04 -3.3992872162809032E-04  
-4.5662769761057600E-05 5.3796719681481410E-04 1.8700527924748548E-04  
3.7839428268579892E-04 -2.1084142584364913E-04 3.8413638992587185E-04  
1.0259396932675891E-04 1.0516985435360332E-03 -6.6358911938307506E-05  
1.1592602658193399E-03 3.4400314613362116E-04 6.5792000203754029E-05  
-3.0392467698234178E-04 4.9787169091452285E-04 -3.2981125281161399E-04  
-6.3919667707952019E-04 -4.7472021853572964E-04 2.2111266817821269E-04  
-7.5954324475261564E-04 1.0435681063036258E-03 -6.0156337819594297E-05  
4.6167984618159761E-04 -4.7431866411150992E-04 1.8272606567709625E-05  
-1.6484447455372440E-04 -7.6686966006326034E-04 -4.0904745201268382E-05  
1.1472367879229853E-04 -3.3468646301950625E-04 -1.2546892082022391E-03  
2.4132764671741817E-04 -2.8246829033451871E-04 1.2538041479686604E-04  
-2.1614357387463834E-04 -1.0292515110404670E-04 2.2327981301238116E-04  
1.7574117268872931E-05 -3.3706844383191860E-06 -1.2522570743161461E-04  
1.1183017239936741E-04 -2.7249990204537497E-04 -1.1766902211214512E-04  
2.0808370786359380E-04 -1.4635955940897503E-05 -1.0022722019975719E-04  
3.6678561665235175E-04 -2.3361009108726403E-05 -2.2469279135823621E-04  
4.2057992086904668E-04 1.7099413519910123E-04 -4.2611037086806054E-04  
-3.9829188773947010E-04 -6.9694786630938245E-05 1.1024770199718351E-03  
1.0630608744368168E-05 4.4486973551695238E-04 -3.7935360065665373E-04  
-1.5763632123360347E-04 8.7234284131740432E-04 1.5572787728550621E-04  
-2.2783109747882293E-04 -5.7076274945207456E-04 9.0707869507203310E-05  
7.2714111451616711E-04 8.2140384677114361E-04 8.9094475075986298E-04  
4.0185737030067981E-04 1.0477874039545905E-04 1.1194162815751522E-04  
6.6666915635289347E-04 -4.7041190562258892E-04 4.8044992611441485E-04  
1.7067267257661422E-04 -8.2427956588186920E-05 9.3373005688317820E-05  
2.6384555059241424E-04 2.3248107536198779E-04 2.3550250271137324E-04  
2.5589683546398546E-04 -9.1044714223634158E-06 2.9733827538616062E-04  
2.9486555706915637E-06 -2.0066384434456382E-04 5.5174337817577044E-05  
-2.0097285205450481E-05 -1.7754974310657816E-04 3.6311828989198450E-04  
-1.4907461551853443E-04 2.8219576185767039E-05 -5.7296794777182442E-04  
-1.3720875982347596E-03 4.7955972434871161E-04 -1.1676509516080950E-03  
-7.2663237578495565E-05 -5.5383598219095479E-04 1.3330631030624815E-03  
4.2527999045145081E-04 -4.4228371787065389E-04 -2.7705869881531188E-04  
-2.3338301702717799E-04 7.2937445348794899E-04 7.1986400079020706E-04  
-8.7539158635413137E-04 1.1351776353764693E-03 -4.8798993338147146E-05  
-3.9212114020317703E-04 -7.3277105026617285E-04 4.3167701540237823E-05  
1.3402503831060923E-04 -1.5334369822122842E-03 -1.1438230618939808E-03  
1.2660414829480215E-03 1.5625471264056692E-03 -6.9520234641577575E-04  
-3.7913447660729583E-04 -6.5433304082886687E-05 9.4477773008284184E-05  
2.8754860478809964E-04 -1.0790931931966664E-04 -6.5406259590265316E-05  
2.8518564158925360E-04 -2.2718848988063394E-04 -2.9784586590889297E-05  
-2.5080178611642449E-04 3.3716211406842405E-06 -1.2811974475415822E-04  
7.7975833063466854E-05 -1.2135363808970903E-04 -4.7687599212697147E-05  
1.9491791583056014E-04 2.1825207829224925E-05 1.9594969749497628E-04  
3.1296953691830552E-04 7.2191007309288348E-05 -1.1844526452654074E-03  
1.1879645903112692E-03 -9.4855668743131047E-04 5.1487976138543059E-06  
3.2938234647909116E-04 -9.2489913160718822E-04 -1.4519563934058848E-04  
1.6561843378620593E-04 1.8735521959036674E-05 -5.3905446417669683E-04  
5.4851266234942674E-04 -2.6601761676395941E-04 -3.9571580835370330E-04  
1.2529412812896905E-04 7.1149584251072048E-05 4.3481875949395244E-04  
-6.3593654135904204E-04 5.9269359437805473E-04 8.6013571696912029E-04  
-1.2176793366380163E-04 2.8131584955462410E-04 -5.2430019569584679E-04  
2.3876513164499327E-04 1.6085030177709776E-04 2.3504136710704434E-05  
-8.5061724882689956E-05 -2.7956784914742067E-05 -2.1312708859638256E-04  
5.7052655562183393E-04 4.6939521707418889E-05 -2.1881027529750498E-04  
1.4652091440390470E-04 -1.0345777766700700E-04 3.3366573209789561E-06  
-3.0164379323287515E-04 -8.2107252926025330E-05 5.3018456619018969E-05  
1.8158059923082789E-04 -4.6839760017421318E-04 1.8762399242955923E-04  
3.1445102720525084E-04 -5.3033834022746251E-04 5.3558687827412314E-04  
2.4388126984522526E-04 -2.1671084025108581E-04 3.9181152009219652E-04  
7.4732515750696859E-04 -1.0527014068224324E-03 5.0669080529152277E-04  
1.4908156943147406E-03 5.4946344586207928E-04 -1.3744600008692316E-03  
-1.3306760912154322E-04 2.2867486090575952E-04 -7.2235940664705284E-04

1. 2481804247158679E-03 8. 6066455887921062E-04 5. 5541366651659977E-04  
-2. 0248374921273614E-03 -2. 3585441209537109E-04 -8. 3888997227939079E-04  
4. 850820264443997E-04 -3. 5859743165622937E-04 4. 6578318526422187E-04  
-6. 0653675651045403E-05 -2. 8723806882013529E-04 2. 2785877642609198E-04  
1. 6443721466436766E-04 5. 3741545060049825E-07 -3. 5894159009334739E-04  
-4. 8953897747951150E-05 4. 9703576287149296E-05 -3. 9927417062869116E-05  
5. 4105228318939782E-05 3. 0550369147893704E-04 -3. 2610487922387749E-05  
1. 6703503426309917E-04 -1. 5733876022715204E-04 3. 4084281428436422E-04  
-4. 1713225688821098E-05 -2. 3186548270123737E-04 3. 6098078811597575E-04  
1. 2286359444015217E-03 3. 8711551480215983E-04 -9. 5765846571140933E-06  
1. 3045563427419770E-04 1. 7158081285070911E-04 9. 0329720938871964E-05  
4. 7325282656024459E-05 -3. 3318356073615827E-04 -4. 3426702848658127E-05  
3. 2929915839323643E-04 -4. 4406510272501263E-04 -3. 2868528092385661E-04  
-3. 2110309673725139E-04 2. 9300574468237007E-04 2. 6837030458823358E-04  
7. 6695293518992181E-04 -7. 8016433990152725E-04 -2. 7843625736295963E-04  
-9. 1565388257967655E-05 9. 0781392561114702E-04 -2. 3579396452060534E-05  
2. 7451021832559529E-04 1. 8804391073515454E-04 -1. 0189658641182534E-03  
1. 8689954503883920E-04 -1. 4449966923552122E-04 -3. 0527624961414359E-04  
1. 8447374565515646E-05 2. 2882104944303472E-04 1. 2027444414450180E-04  
-2. 5464601119956447E-04 -2. 0181689103895849E-06 5. 9342435259274642E-05  
8. 0067121558894587E-05 -8. 1231120283607763E-05 -4. 9465190837076402E-05  
-6. 8837716980824488E-05 2. 5278855723773734E-04 -1. 9869050856623086E-04  
3. 9337542335657626E-04 -2. 3969152797633371E-04 1. 8776677055010424E-04  
-4. 5732804853528247E-04 3. 9588355577702876E-04 -3. 9974202016354078E-04  
1. 0248311223578005E-03 -4. 9194899510313030E-04 3. 1878526273209620E-04  
-6. 7817016085526115E-04 4. 0651042187664078E-04 -4. 5417844319069179E-04  
1. 5589292870023519E-03 5. 2484152736142554E-04 -5. 1100908047942183E-04  
-1. 3088833270194780E-03 -2. 5482889666767822E-04 6. 2636728347865392E-04  
-5. 3334167689938106E-04 5. 1280298897592332E-04 -2. 3878205577808413E-04  
7. 1140925593112339E-04 -1. 7042141976834324E-04 2. 4904828457868210E-04  
-6. 0965749758061147E-04 5. 3481571675995608E-04 1. 3658923266278503E-03  
-8. 4309900047861391E-05 3. 6987386119744761E-04 -1. 1279544581368276E-04  
2. 5944465095011527E-04 -3. 4974935965465364E-05 -2. 2883496772233323E-04  
2. 9589760620260933E-05 1. 2201086199320066E-04 2. 0025950818516923E-04  
-2. 7129622390487427E-04 1. 2426605903978926E-05 -2. 4332244192678561E-04  
-1. 4264547606526761E-04 -2. 4866894821528842E-04 -9. 1952995357477853E-05  
-2. 6728460847727731E-04 2. 1675522657828912E-04 -1. 3081961705652543E-04  
-9. 7354883200800424E-04 2. 0171629508250339E-04 -5. 2754227971513364E-04  
-9. 5788466167353266E-05 3. 0246011375004113E-04 -1. 1156652502307557E-03  
-2. 1934907714324714E-04 -1. 1141383924842393E-05 -2. 6395880738838370E-04  
6. 0884599706961698E-04 6. 7713386233065297E-04 -7. 7845294114534699E-04  
7. 7796834455060948E-04 4. 9745434511003282E-04 1. 6500225212097707E-04  
-2. 8366478556973765E-05 7. 3030771200546007E-05 -4. 9139465504086609E-04  
4. 4928384848460796E-04 7. 6963151545688486E-04 4. 1571689455196603E-04  
1. 3667393275823012E-03 -1. 3458833788337783E-03 -3. 2721755832526003E-05  
2. 1086032363587317E-04 -2. 7757482628336762E-05 -2. 7976420243543880E-04  
3. 9521576478576838E-06 -1. 6115676632693962E-04 -8. 2589022167328552E-05  
2. 4333032389166624E-04 1. 9431523105563055E-04 2. 5551718058255984E-04  
-1. 3160886397571483E-04 -1. 9342502088158010E-04 -1. 1387516592788141E-04  
2. 1164231610969607E-04 6. 0207927188747689E-05 -3. 6287824349259454E-04  
1. 424182597774988E-04 -1. 3550941619031482E-04 1. 5021521227868320E-04  
-9. 0496012496364675E-04 6. 1739517181675545E-04 9. 5489370747072356E-04  
4. 9189098064450823E-04 -5. 1084424915872901E-04 -4. 8700264488311988E-04  
-1. 2106082182656434E-03 8. 0451843429193802E-05 -1. 1640263279656447E-04  
-4. 2361527976734727E-04 -8. 2619852449133100E-04 -3. 3025187866310971E-04  
8. 1313486764055963E-04 1. 1213408157915320E-03 4. 6437330102856375E-04  
7. 6045276210493320E-04 -1. 4695542629093096E-04 1. 3386365372912538E-03  
6. 7799839373700033E-04 -2. 2408663418856592E-04 -8. 7180102967312318E-04  
6. 5546302944108630E-04 -5. 8890288358073048E-04 1. 5507449199693274E-03  
6. 5437735711285110E-05 -2. 0790463328587523E-04 2. 6390488668115344E-04  
-1. 1938102487078691E-04 8. 7460367985787193E-05 -1. 9265140915862829E-04  
1. 8105908074716255E-04 4. 3871045248733966E-05 -2. 5583015229864746E-04  
4. 8692360258722247E-04 1. 3179540905646071E-05 2. 4264065367070623E-05  
3. 6693063615996201E-05 5. 3448682594101387E-05 -2. 9289059978786149E-04  
-2. 7375102317242240E-04 -2. 0807854589011926E-04 -2. 7365806308641855E-04  
-3. 5977674312844855E-04 -2. 9093651454845310E-04 1. 2453660017009054E-03  
-4. 2380861648604284E-04 -9. 64395995486029807E-05 9. 5393634901952851E-04  
-3. 7868226667010118E-04 -7. 1440938601013705E-05 1. 7356517346007599E-03  
1. 0359949785855010E-03 3. 6528625782343050E-04 -6. 5954290397335510E-04  
-1. 0800662867418954E-03 1. 8684114209887030E-04 5. 5795289396928967E-04  
-2. 5137013485995681E-04 1. 7198947043405998E-04 -3. 8570210602478837E-04  
-1. 7640789506328394E-04 1. 1162826647519714E-04 -2. 2994251466422355E-04  
7. 0807794471200176E-04 -1. 5548130182783775E-03 1. 5637408082444287E-04  
-1. 0392032317696184E-05 3. 1195229718562039E-05 3. 0239922505185597E-05

-1.1740538743406690E-04 3.6979273043562071E-05 1.0614596611013075E-04  
-2.9412284580861424E-04 -5.0207038429675365E-05 -5.3084566213147460E-04  
-2.7103698764734305E-04 -1.9857765183774531E-04 8.1060815314906219E-05  
3.7556805785809893E-05 1.7995419339882893E-04 -1.2344307706326258E-04  
3.6683868141181956E-05 -1.0132728125206339E-04 -1.5587057820873229E-04  
-5.6266072155258015E-04 -3.5652460035993862E-04 8.0614348531440514E-04  
7.4758904996961536E-04 1.5566255350504146E-04 -3.3886208341308834E-04  
4.5051810629785101E-04 1.1994946994827974E-03 7.4925083094812121E-04  
-1.0385863957709260E-03 4.8516937391858325E-04 2.8715466501882741E-04  
8.4113928386123831E-04 1.2347222084160161E-04 -3.0568693169962907E-04  
2.0920725228950292E-04 3.8903694077259567E-04 6.2525393974979576E-04  
-6.5157356133382211E-04 -3.7077750094051328E-04 -1.0347486791397905E-03  
-6.8507317012675016E-04 -1.2202694064189795E-04 -1.5212376523986715E-04  
-8.3007336251647728E-05 2.8504263807779210E-04 1.1754125438712340E-04  
-3.1572794811598517E-05 2.0541878590989645E-04 6.2898315938638119E-05  
-1.7966188753580742E-05 -2.1599983417255910E-04 2.6895464838700635E-05  
-1.8340120352861239E-04 3.1416126905983483E-04 -1.0023437953687590E-04  
-6.4157595306680445E-05 4.2158931241208771E-05 7.8897415563056108E-05  
2.8397567734374239E-05 -1.3775199238475508E-04 -1.1494296764234194E-04  
-5.7006312917927545E-04 -3.8702245687548048E-04 6.4102116428968751E-04  
-9.5058630776493692E-04 -2.7730377834440234E-04 3.1247740861582471E-05  
5.4282402931983914E-05 -2.2195413333940138E-04 5.6925188771474102E-04  
-2.4370142340452591E-04 -1.7202750436177183E-04 -6.3309959501680550E-04  
-1.3464280329720062E-04 3.0951858521467159E-04 -8.1650838154272338E-05  
2.7413611384333408E-04 3.6418407299442684E-04 3.1561306741292449E-04  
4.7335474845165715E-04 -5.25301021287514837E-04 7.0124413141807787E-04  
1.2818281096557977E-03 -7.6356775756556132E-04 -1.1852011426784746E-03  
-4.7158109113639251E-05 7.8206687153148147E-05 7.7713226431594984E-05  
2.4645553526107946E-04 3.9373417735069345E-05 -1.1133630811643771E-04  
-8.2544739963683217E-06 -2.1548756089424841E-04 -1.7649883840244136E-04  
-2.3603469432994898E-05 3.7801683212147677E-05 2.1974372360568522E-04  
-2.8193580033612916E-04 1.1484531077545358E-04 -6.8269765580580871E-05  
1.2078892033631628E-04 -9.1902199774548265E-05 -7.0913135133507645E-05  
8.2774252449047714E-05 -1.9658821861153706E-04 -7.8950169396859013E-04  
-7.3170978582500650E-04 1.9032031184703496E-03 -1.3962134274103836E-04  
7.8606448489980222E-04 -3.5248749122804133E-04 7.1969001167221912E-04  
-7.8122841086890890E-04 1.2279641147937954E-04 1.0356626686372118E-04  
1.0528990734147952E-03 5.3596656710680349E-04 -6.0877923040211735E-04  
-6.4523645665873108E-05 -1.0405257254829867E-03 3.7982606290103789E-04  
-8.2047085938057257E-04 -1.0895813630117960E-03 -1.0021655028801194E-03  
1.3879207729076669E-04 -7.1257281905939152E-06 -2.2646202035261548E-04  
1.9775998072362919E-04 -1.2280812769357199E-04 5.3212009051960460E-05  
2.3854894532195203E-04 -1.3095364601006690E-04 4.6139791426921080E-04  
-4.5662484351542907E-05 -7.6684236757043949E-06 -3.2437370424751448E-05  
-1.6702039483196371E-04 3.3612190395792519E-05 1.9215110647118072E-04  
-1.3468366996158919E-04 -8.4585225035912963E-05 -2.3749390633087639E-04  
-2.0412833230706683E-04 -1.0599574072047533E-04 -2.9289942949080246E-04  
-3.9281111515072589E-04 -1.1909772427672915E-03 1.5495512323886538E-03  
1.1569879958875434E-03 7.9309251881881757E-04 -1.3142556787152763E-03  
-9.3326542350485810E-04 7.3594195495591127E-04 9.0753163716520444E-04  
3.5586854395025817E-04 1.0960280068295493E-03 -4.1909120046951741E-04  
-2.5347619744960110E-05 -8.7618331062468049E-05 4.2651825388097947E-04  
6.3406948261708737E-04 -1.9090751712260123E-04 -2.4815126421660682E-04  
-1.6758542177752492E-04 -4.0768863746930024E-04 -1.1447380211985823E-03  
2.5980041963881141E-04 4.9690578042227353E-04 6.8359670171970726E-04  
2.1296512977600216E-04 2.5028179406181017E-05 -7.9976099363775001E-05  
3.5988221065545533E-04 8.6147809482277040E-05 -1.6916799542769382E-04  
-3.5876905518288163E-06 -1.1056236269890467E-04 6.1488473603149352E-05  
-3.2722321802852614E-04 -1.9598228987659439E-04 -9.8138236068883261E-05  
3.0428503634385003E-04 -2.0413476614389428E-04 9.4128110802242019E-05  
7.8843114091507160E-05 -1.2168786597437209E-04 3.5059581450724126E-04  
-1.4641554899305805E-04 1.1814246993237473E-03 2.7822118611736859E-05  
4.1889645667546029E-04 -8.3376263225956755E-04 8.1867239671941155E-04  
3.2930660519763216E-04 -4.6734784939088267E-04 -4.1886913314372683E-04  
5.4815929902271652E-04 7.8404429330702070E-05 3.8574980096489305E-04  
6.2164650072835820E-04 1.1577141066349342E-03 3.1257759447244038E-04  
-4.4121900844994752E-04 -7.3318441830399908E-05 7.5072069079096815E-05  
7.4781262366033089E-05 -7.5744792067759760E-04 1.5323747106046331E-04  
1.3809811354006181E-04 -1.0836461295654460E-03 2.2825764612340754E-04  
-2.6221855411305290E-04 -1.1807258821705928E-05 -2.1508592012521320E-04  
-3.8395378802124631E-05 2.1966276902668302E-04 -6.1829434362923160E-05  
2.1881013355206117E-04 -3.0481647096248062E-04 3.4385012248016716E-04  
-3.6803604780547082E-04 -4.9877611065128019E-05 2.1413766869463822E-04  
-2.0764704578386301E-04 1.7816045064484429E-04 6.6727179913515170E-05

-2.9340315667740187E-04 2.8799236855371802E-04 -2.2801849595999932E-06  
-2.8979770690134427E-04 -5.2011134365706122E-04 6.1952130293916588E-04  
5.3565688627715694E-04 5.1756110522001449E-04 -2.7197375816212862E-04  
-2.8023779877930536E-04 1.3893442839352921E-04 4.8810797664044847E-04  
-2.5304026826040689E-04 1.4850650650067910E-03 4.7864878415222376E-04  
4.4663206713744413E-04 -9.7031427013660637E-05 3.4221684314119803E-04  
1.4706429532815838E-06 4.3442187935044087E-04 1.2033692277774986E-03  
3.6743100425615217E-04 -7.4247002286573986E-04 8.2123438957035048E-04  
-8.1363850073180215E-04 3.0018274706751486E-04 2.9102662182459724E-04  
-5.5971878137358195E-05 -1.4065609366943373E-05 1.9053073678988836E-04  
-1.2627378983673643E-05 -5.2358298997889105E-06 -8.5294901850600370E-05  
1.6974695108667106E-04 -2.351781763357761E-04 1.1349751060788481E-04  
-2.8373541909748254E-04 -9.9321893640280610E-05 3.6596843177553898E-04  
-1.8457568333991176E-04 -7.6622700215340530E-05 1.8719710304198443E-04  
-7.4060608742394267E-05 4.8325127010452373E-04 -2.3762337175211431E-05  
2.4167795390722194E-04 -7.0905630159016062E-04 2.9661780054988988E-04  
3.7124138275618175E-04 -1.3313430247087962E-03 -7.9354787293910254E-04  
6.1686199201059716E-04 -1.1358065410503942E-03 1.5614353136040601E-04  
-3.6762440238799395E-04 -6.4902756106363353E-04 -1.5837507519065924E-04  
6.2980601017924553E-05 3.3483386248608395E-04 -8.2042211842546606E-04  
-5.8935294770967443E-04 -3.7656095773536385E-04 -1.7427395261565856E-03  
-9.8835110114140094E-05 -1.3997678344432308E-04 -1.3340557838825450E-03  
2.7030326556598788E-04 -9.5852078827805289E-04 -1.3911308978044708E-04  
1.2628371442042455E-04 -2.3105456303886853E-04 1.5113875317722857E-05  
2.7433096081361603E-06 -2.4143003681896648E-05 -2.9158673707721901E-04  
-8.3540266594267403E-05 2.6121123980678697E-04 4.6273755234191472E-05  
3.1563637072122444E-04 4.3561860949134886E-05 -9.6022911126217398E-05  
2.3420564054633543E-04 3.3126265827713087E-05 9.2099395528913875E-05  
2.9097526398236001E-05 3.8214290817766434E-04 -2.8948294491385721E-04  
5.2616387639288736E-04 8.4979759956744789E-04 9.3576086543019604E-05  
-9.3757887422635613E-04 -4.6156873183179225E-04 2.1340953102923538E-04  
2.8919712219721333E-04 -1.0501193608022095E-03 -5.0574606058100577E-05  
-1.0159903208362432E-03 -1.8248707629622903E-05 2.0029543867281440E-04  
-2.0179012108561439E-04 8.0352121534744449E-04 6.7512403254024842E-04  
-1.1153957439986478E-04 2.4568678618709693E-03 6.0230792742680501E-04  
7.5558404282154298E-04 3.2801888252732093E-04 -1.2757338743935103E-03  
4.2823127518444977E-04 1.6806109955150241E-04 2.4911101099843409E-04  
-1.9291116294659746E-05 -7.6489107295358341E-05 -5.6774092907015010E-05  
2.0458355311039173E-05 1.9610041518006497E-04 -1.7475646687794538E-04  
1.4019050225664610E-04 -2.6848979340511581E-04 8.2213684316377944E-05  
4.4229441675523203E-04 -8.5535908462136426E-06 -4.3394027771706774E-05  
1.5248251842377901E-04 1.2906978452992493E-04 1.5496441777647271E-04  
2.4903805284027386E-04 9.5294557658333220E-05 -2.2409608072852509E-04  
-1.1234236779054370E-03 9.5960573698362689E-04 3.4167893494366219E-04  
7.3978093525970095E-04 -2.0218330313017321E-04 -8.0422937010200726E-04  
-4.4589815517894368E-05 1.2782816056730517E-03 -6.1463866182375306E-04  
6.3030556772914262E-04 -4.2072996058036215E-05 3.1827618143202069E-05  
7.1251474608084102E-04 -6.0325545628730234E-04 -1.2784459945671565E-03  
-1.8842021021697251E-03 3.6662178610768516E-04 -6.197082382777431E-04  
7.9196917962860789E-04 2.7073348045428801E-04 -2.5821991957160394E-04  
4.8618006598306700E-04 -1.0989159012398839E-04 -2.8449347911655126E-04  
-2.1055779928392563E-06 7.3784893523058857E-05 3.0271366530296948E-04  
1.6596255337449474E-04 3.9496782784967518E-05 -5.2201863280009570E-04  
-1.4053297356358835E-04 9.4071916714765527E-05 -2.6765974579875257E-04  
-9.5402089273842759E-05 -1.1593080101396948E-05 -1.7393315717355641E-05  
-2.9014300769023292E-04 4.6085265531186617E-04 -1.2581479053994427E-04  
1.6955950800669848E-04 6.8488007431755595E-05 3.4266379886130413E-05  
3.6405603760156163E-05 -1.3743955786341190E-04 -8.4436905044542614E-04  
1.0748301102689235E-03 -1.2661886905639195E-04 9.8076564615145350E-04  
-2.5642079145018679E-04 1.1121882056485102E-03 1.9900666673532289E-05  
5.9719516898443193E-04 7.0043407720133213E-04 -1.4209877689006346E-04  
4.6019535990377518E-04 -8.5565652559975713E-05 3.8728249042890801E-05  
-1.1936449379343738E-03 1.2020957804029996E-05 -2.6172810996492163E-04  
1.7442091412403799E-04 -1.1120460065304255E-03 -1.9041179033003867E-04  
-4.4936633397114683E-05 -5.0781197785900725E-04 -6.2828222377460646E-04  
3.7893141539055967E-04 2.9780676686620803E-04 -5.7032264823647873E-05  
1.5591499966397974E-04 3.1611879748086785E-04 -8.5491358930336074E-06  
1.2868072158720301E-05 -1.1310399107161157E-04 7.0147610376099386E-05  
3.8331910907895102E-05 -2.3519969720490731E-05 -4.8616595408606270E-04  
-7.3132307585875353E-05 4.0815841235978563E-04 -2.4027935921368645E-04  
5.4467400682103550E-05 -1.5186944742909167E-04 -3.0000016940025823E-05  
2.7744790806807928E-04 1.2976638112037839E-03 1.2920869305567455E-04  
-1.4527680627199220E-03 1.6378749666047319E-03 -6.4896278399806091E-04  
4.7452126874609232E-04 -2.1186389806320991E-04 -2.9453972415774795E-04

|                         |                         |                         |
|-------------------------|-------------------------|-------------------------|
| 6.0842224727625542E-04  | 1.7070425549096479E-04  | 1.8948910857977632E-04  |
| 1.5508096259560036E-04  | -3.6019625747670095E-04 | 2.1016772936933054E-04  |
| 4.9453915024856695E-04  | -1.0407573966528464E-04 | -2.1330078340698849E-04 |
| -2.5503527212333556E-04 | -1.7700264168096048E-04 | 2.9277692530203638E-05  |
| -1.3890045497682167E-03 | 3.2549316201857961E-05  | -1.9276129754058186E-04 |
| 2.6494956548205268E-04  | -3.5416533606625543E-04 | -2.6071796339779518E-04 |
| 2.4620722712233388E-04  | -5.3996529904338436E-05 | -7.9227867787736112E-05 |
| 4.7583201241001717E-04  | -1.2773162780064197E-04 | -3.9390715894420656E-05 |
| 7.2986788982629388E-05  | 9.8889083905303191E-05  | 2.2660351166713262E-05  |
| -1.6166806672778333E-04 | 1.7087758652987789E-04  | 1.6058923580710238E-04  |
| -2.8042358570350341E-04 | -9.3724153771156438E-05 | 2.5666646304613107E-04  |
| -4.5932141762765040E-04 | 9.3220180204537859E-04  | 1.9505540362745317E-05  |
| 1.1857838204214514E-03  | -5.4409619840717664E-04 | -6.7096563988851830E-04 |
| -1.0088363976357025E-03 | -4.3403129209182564E-04 | -8.3120294871445375E-04 |
| -5.8671131439372358E-04 | 6.5943535459921153E-04  | 2.8524842142347467E-04  |
| -3.6934249917697887E-04 | 1.7222892965395448E-04  | 4.5297744359529767E-05  |
| -4.4138072127853360E-04 | 4.0977423234541890E-04  | -8.2154087698559802E-04 |
| 3.6724575244943613E-04  | 1.3156938025615667E-04  | 8.0956201196875801E-04  |
| 5.2052051102253495E-04  | 1.5287658978165115E-04  | -2.3229383809002089E-04 |
| 2.6619676227223005E-04  | 1.5408270051928515E-04  | 2.4111007750872992E-05  |
| 1.2755410453313723E-05  | -9.1459921542559754E-06 | -2.2511867898835874E-04 |
| 7.7023278709657578E-05  | -3.9548953369084039E-04 | -7.7029359438663618E-05 |
| -1.8335412652868737E-04 | 2.0722088203782872E-04  | 1.3168350983304105E-04  |
| 8.3651182964296074E-05  | 4.9947337916247318E-04  | -3.8025204086693666E-04 |
| 3.6021544673128438E-04  | 1.0215378468169051E-04  | -1.6180617745289687E-04 |
| 3.4992301492771605E-05  | -4.8836994774409371E-04 | -9.9956776609206959E-04 |
| -1.9994023627501926E-04 | -8.8513131034396227E-04 | -8.1179318121938119E-04 |
| 1.1801372743382933E-04  | -3.0224881809743297E-04 | 7.2254059464464302E-04  |
| -6.7198859624397703E-04 | -7.7723233791256651E-04 | -2.1939022196734323E-05 |
| 2.6820344203290654E-04  | 9.8852495710302873E-04  | -3.5726220501849031E-04 |
| -3.2624045083036874E-04 | -5.5910734734588837E-04 | -4.9463065800907434E-04 |
| 9.0419541562715281E-04  | -5.0181497500499065E-04 | -9.6126185797769945E-04 |
| 1.4581977150827371E-04  | -1.4706502305133831E-03 | 7.9608879140772562E-04  |
| 3.2823334467149375E-04  | 2.3182915034589152E-04  | -1.4666574847275963E-04 |
| -6.5420215120760568E-05 | 2.7998238837769114E-04  | -1.4738066772085258E-04 |
| 3.4610083461807773E-04  | -7.6582517039782604E-05 | -3.3818097269883054E-04 |
| -2.5191240522471013E-05 | 2.2068074755128100E-04  | 4.2732388229085653E-06  |
| 2.1196711714611670E-04  | 1.0972846263699389E-04  | -3.7263322019311253E-04 |
| 2.6854685455987418E-04  | 1.7496226329598454E-04  | 9.3670386432928479E-05  |
| -5.2970955552361382E-04 | 5.2838023754470727E-04  | 1.9173856101822306E-04  |
| 2.2491605556604157E-05  | 9.2150976933542169E-04  | -1.3970834737607627E-03 |
| 2.2660750493842390E-04  | 3.4293952456327525E-04  | -4.2158595423716171E-04 |
| -3.6172605114947293E-04 | -6.9257675275112443E-05 | -1.3693820033826081E-03 |
| -3.7894699739047545E-04 | -1.8209027489509326E-03 | -5.3002914144362765E-04 |
| 8.5810473540549057E-04  | -7.1436157680402018E-04 | -1.8145576140465687E-04 |
| -4.2169997417817963E-04 | -1.1937351757921387E-03 | -1.5282565721299604E-04 |
| -1.0279161046634409E-03 | -1.9910630143184344E-04 | -3.1386656119282257E-04 |
| 1.6595405205293944E-04  | 1.1545222602577019E-04  | 7.8856049599607135E-06  |
| -1.7882619130351305E-05 | 1.6034352486535712E-04  | -5.0939165439185403E-05 |
| 1.9903297178386231E-05  | -4.0347415195186420E-04 | 1.5738363602815382E-04  |
| -1.8945406125056649E-05 | -1.5087387873451947E-04 | 1.4050782255878072E-04  |
| -1.188322740003950E-04  | 1.5700325359070292E-04  | -6.5937634700974699E-06 |
| -2.0293241117152376E-04 | -1.5517562214652694E-04 | -9.1918471103243462E-05 |
| 1.2431408455272644E-04  | 9.5678432992364691E-04  | 2.8520430289864578E-04  |
| 1.5350394186784868E-03  | 1.5519193206225108E-04  | -6.1969906284562067E-04 |
| -3.1884940069039345E-05 | -1.3658343643830702E-03 | -4.5903532567536742E-04 |
| 5.9314921817788739E-04  | 5.9723507463047801E-04  | -2.1199524097402785E-04 |
| -1.6939883258372749E-03 | 4.1853002748636780E-04  | 4.4799580849923162E-05  |
| -7.1560037164402807E-05 | 7.7386309029812419E-04  | 1.2708609596570803E-04  |
| 5.6617114119017074E-04  | 1.0896233256883256E-06  | 6.4605751393483220E-04  |
| -6.2947740031190442E-04 | 9.4099474659747903E-05  | 5.1750390578757504E-04  |
| -1.9296944780922655E-04 | -1.2405115759949367E-04 | 2.3834232920843924E-04  |
| 1.0934733134034514E-04  | 1.0118562274451289E-06  | -4.3404974850531994E-04 |
| 5.7267794574065816E-04  | -2.5499129006682813E-04 | -1.2215374093064207E-04 |
| 6.0041431689451211E-04  | -2.9745272662446353E-04 | -2.7900303200838151E-04 |
| -1.0851648840577407E-05 | -2.8585620553000889E-04 | 2.8616029547321944E-04  |
| 3.2295622328884813E-04  | 1.6126259652582602E-05  | -6.0884195248979910E-04 |
| -7.9324072444182420E-04 | 6.0500981128552412E-05  | 5.1198928510816518E-04  |
| -3.7786912905804140E-04 | 2.1140092124925084E-04  | -8.7850534873863261E-04 |
| -6.7987477145175785E-04 | 1.5833862553158405E-04  | -1.2844779695409137E-03 |
| 1.5949892664626536E-04  | -9.4452534415413617E-04 | -2.8737221149541481E-04 |
| 5.8558643285822954E-04  | -1.0311317185290865E-03 | 1.3313304417300308E-04  |
| 1.2899922819651288E-03  | -4.7584392970645819E-04 | -7.2369148499349431E-04 |
| 4.3215359725890581E-04  | 3.3414055396918516E-04  | 8.6743328564881095E-04  |

-7.5758283864296174E-04  
8.4727485833222411E-05  
-4.1000220217928749E-04  
2.2187335357893993E-04  
-4.5455899528210779E-05  
1.2169911796647983E-04  
-1.5623810916645019E-04  
1.1921636539629530E-03  
1.2328663842482094E-03  
4.0032547175164164E-04  
-1.5063821725501748E-03  
-3.2400009651293915E-04  
-8.3555352974150723E-04  
7.6124934512259454E-04  
-1.2262301660880500E-03  
-1.6589249829921190E-04  
2.2640021478994270E-04  
-2.6866693944729261E-04  
-1.9942278812310182E-04  
8.6730939200230450E-05  
3.0537091959995560E-04  
2.8927953334820900E-04  
9.8381897645323166E-04  
-4.1566390863489501E-04  
3.3353384065474909E-05  
4.9498298379291826E-04  
2.9604537166700331E-04  
2.5875158146467582E-04  
4.8968934924303723E-04  
-2.1863213331123650E-04  
1.0467491263896250E-05  
-9.9342869286790877E-05  
-1.4759469703908755E-04  
7.4936221074659585E-05  
1.3442901243952308E-05  
2.5766911199100802E-04  
1.0411104870580212E-04  
3.3144936192123603E-04  
-1.0060109762810613E-03  
1.3284589585092803E-04  
2.6925237110120873E-04  
-7.9069188696514656E-05  
1.2752117127507880E-04  
-8.8030784373846848E-05  
-2.4243454248677648E-04  
-4.8090619332270597E-05  
4.6431490115643941E-04  
8.2687793399432717E-05  
6.0548015535273985E-05  
9.2700426449104153E-04  
-2.4301024299264894E-04  
-2.3755322872345521E-04  
-4.9936327262104624E-04  
-2.7892853346799798E-04  
-7.8205270037124297E-04  
-1.3943059159194169E-03  
-7.8860757854272694E-04  
-5.2352676866307033E-04  
1.4809528745142976E-04  
-1.7654092166302456E-04  
-4.0124723465545966E-05  
2.0382184696568072E-04  
-2.7167764527823401E-04  
1.3319472424275119E-05  
2.2885960695568123E-05  
6.9299095937364052E-05  
-4.1930525252762779E-04  
-2.3849173697105703E-04  
2.1558150341472528E-04  
2.0056138328559007E-04  
1.5751254143099207E-05  
1.9605685412167118E-04  
5.2996024909869806E-05  
-3.7116922091419988E-04  
-1.7636378018665380E-04  
-2.1745677505232333E-04  
1.0769015679477140E-04  
-1.2526627258815776E-04  
-1.0408638151362046E-05  
6.5626073541136265E-04  
-2.8314991975214349E-04  
4.5182758848864467E-04  
1.4078107712622533E-03  
9.3787119607669270E-04  
1.1303249212007891E-03  
-1.4700409837937792E-04  
1.4497400214179927E-04  
6.5221531890225838E-04  
-3.5468543852617515E-04  
-4.2760016353905744E-04  
-7.5641017670106944E-05  
-3.4757149930333888E-05  
3.3625317094337475E-04  
-2.7315559970503826E-04  
2.7559167325072665E-04  
5.5927487021940523E-04  
2.6613757497661287E-04  
-3.4696848948004728E-04  
5.9129178860835838E-04  
5.1525393581394209E-04  
5.7440906271258763E-04  
8.1801249443814734E-04  
5.4635725870909074E-04  
1.3307750443404111E-04  
3.3817870468725409E-04  
-1.2560242431756098E-04  
1.6543153933814276E-04  
4.9416821523081474E-04  
-3.9809830390393066E-04  
-4.9859887879548403E-04  
2.4366712602391847E-04  
8.3229900932210114E-05  
6.5377866851246559E-04  
2.3847228723555995E-04  
2.9498507424074869E-04  
-4.5002353476614112E-04  
-8.6689931503782688E-05  
-1.1572423802327476E-05  
1.9983878885597744E-05  
-2.3002592818308814E-04  
2.4209013199855489E-04  
1.6187936002001535E-04  
2.0309770834605912E-04  
1.0137441170278512E-03  
8.3819978326595142E-05  
-2.4563138885153859E-04  
-2.5504613098741008E-04  
-9.4984875860078797E-04  
1.1549546834301459E-03  
-7.8822237153233912E-05  
5.9348619334797961E-04  
3.0442323989418834E-04  
-5.0338291550611884E-05  
8.6644426734194970E-05  
2.2492765780303972E-04  
-1.1600803568806827E-04  
2.3655097636445717E-04  
2.6155163624826995E-04  
-9.1900866666428456E-04  
6.4483610127487572E-04  
-3.6186855483349723E-04  
-7.4585957269716408E-05  
1.8572572853414167E-03  
4.2534345089149613E-04  
4.9309696700304713E-04  
1.3070905456356556E-04  
-4.8252684156843169E-05  
-9.9733530007633019E-06  
1.1494382634231525E-03  
4.5595571197599927E-05  
3.5815694621914578E-04  
5.1936846395696516E-05  
-2.1272375152777686E-04  
1.8782699167426857E-04  
-2.6872775715492737E-04  
1.7112858721600546E-03  
-8.7207772175950673E-04  
3.2718539281296436E-04  
-4.1343291786180092E-04  
9.6687782116290991E-04  
-4.3962397475284126E-04  
-3.6203957730993465E-04  
1.1227982334364257E-03  
1.3096950351616980E-04  
-7.6080433437681813E-05  
-4.6318649405947789E-06  
-3.2565837387756199E-04  
1.2922408964678900E-05  
1.4052935577971127E-04  
1.4692922170219320E-03  
6.9261246320342484E-04  
5.5237267876082909E-04  
-1.5881422215669282E-04  
-1.3216062328630674E-04  
1.5314158658940810E-04  
8.4391654709358398E-04  
3.9381278383948551E-04  
-1.8773945018720509E-04  
4.7123206523937860E-04  
1.2999194832091101E-04  
-2.2438974061999794E-04  
2.3786967851996603E-04  
-1.9451512213206816E-04  
8.1677170677741780E-05  
3.5900889953443773E-04  
-5.2253166846561643E-04  
-3.4873324099095793E-04  
3.4867018644969496E-06  
4.1525225637965255E-04  
-6.5051817726362478E-04  
9.6360734809276013E-04  
-5.7545166538378118E-05  
-5.9293412164362437E-06  
-2.2835149247768779E-04  
3.7927863970454160E-04  
4.7650260489893130E-04  
2.0065779680977924E-05  
6.1959892394628280E-05  
-1.8273721361714089E-03  
6.4898334684457758E-04  
7.7842963234647526E-05  
-4.9188450953652056E-04  
-5.2099402371837899E-05  
-1.2092326419106190E-03  
-2.0825340364730063E-04  
-1.1209153503079790E-04  
-2.5751480871031635E-04  
4.2096655805748151E-04  
1.1964410502429808E-04  
-2.8712339008044751E-04  
-1.6169403473187036E-04  
-3.2999785904177809E-04  
7.2895820513300968E-04  
-1.0013180429412211E-03  
-6.8538620918679783E-04  
-9.4189145418772902E-04  
4.3842947875181293E-04  
3.5298053511967744E-04  
4.0225742741993966E-04  
-2.6460553797403224E-04  
-1.7563083031048418E-04  
-1.1244685368447534E-04

-4.9222153718082471E-04 4.4647821391754686E-04 1.8782285904160023E-04  
-1.6360417981369288E-04 1.4805586326699214E-04 -3.0978275083519386E-04  
2.2922567794157491E-05 -2.1748050002421104E-04 3.2515356815926716E-05  
-8.2151599410778177E-06 -4.6702660121929185E-04 -1.1112729158163821E-03  
6.2551367219675763E-04 4.1769884008487291E-04 7.2535837255228444E-04  
-4.4440398461704567E-04 -5.6869468794481907E-04 1.4111827527570368E-04  
-2.0942464440436938E-04 4.0532274194897077E-05 -3.7361897884423601E-04  
-1.0116624969529184E-04 2.5404341153548415E-04 -6.5263684057117647E-05  
2.5403904462260357E-03 2.0318589399203829E-04 -5.0451612589684980E-04  
-1.0359878675740383E-04 -1.5328951391298180E-03 -1.5843375442252563E-03  
-5.4688635956599125E-04 -9.4938403793372523E-04 -9.8621781878047436E-04  
4.242223762290240E-04 4.4976917316181508E-05 9.6734098705307009E-06  
3.8372381276606391E-04 -1.1368291011545856E-04 2.8392335622895275E-04  
-9.8143886140965092E-06 1.3491037744753299E-04 5.6655781853966137E-05  
4.3496926964402926E-05 2.2576483290825557E-06 -5.1851377355357792E-04  
3.7359094884167307E-04 2.1815985323506214E-04 -6.8514768083479850E-05  
4.0998264335575922E-04 -2.6905063924545568E-04 -4.1020295304045021E-05  
-4.9340687613131544E-04 4.2413332490574064E-04 -3.4303622631074539E-04  
5.3201479536517328E-04 4.2365438253207913E-05 8.1890338920812401E-04  
5.6258249384351070E-05 -6.1201425084222831E-04 9.3737008855576415E-04  
-7.1959516726960221E-04 -4.8452738310432160E-04 -4.1534299461796619E-04  
-9.3499813982507061E-04 -4.5587260621436990E-04 6.0772926115593997E-04  
-9.4309655729812219E-04 -1.4381417299144722E-03 -1.3397115017762330E-04  
6.3735321818086553E-04 -1.1176526241447990E-03 5.7095120215108763E-04  
3.5623698972200087E-04 -2.4611199947468588E-04 -1.0250358793228432E-04  
7.5737176138757940E-05 1.7559320582189318E-04 -3.2086570919455024E-04  
1.6970614179291087E-04 -2.1901616505750978E-04 -1.2589783292377111E-04  
-5.4502009086743518E-05 1.3646297599324448E-04 3.2707330788732286E-05  
1.2364858208929535E-04 -7.0412061787462172E-06 -2.0328047979007512E-04  
2.1311484054905972E-04 5.7232449062121171E-05 -2.5385301701163343E-04  
-2.3598533569874193E-05 2.0535622986562438E-04 -2.9693908619084084E-04  
4.4583850325506305E-04 1.5671106882126211E-04 5.3170767708132121E-04  
5.3043901265039913E-04 4.7465846913188951E-04 6.1303969288606234E-04  
-1.6479872245086898E-04 -2.2877491791678252E-04 4.5478183735740864E-04  
-1.9134936111220855E-04 -4.1362546876951733E-04 -3.2612619820079333E-04  
-3.6296966862720247E-04 -5.0529254953446759E-04 -6.7008750701034135E-04  
-5.8598155038796821E-05 8.4681281191193955E-04 4.1672947472148734E-04  
-7.5007308876280415E-04 2.6033087875703293E-04 -8.7073654063558892E-04  
2.3708188250013966E-04 -4.7015718510824640E-04 1.6821551740668881E-03  
1.0340435916053425E-06 -1.2008102536969752E-04 1.2163214980756439E-04  
-3.9077523536513856E-05 9.1635380903877070E-05 -1.6772462550796905E-04  
-2.7044605846793127E-04 7.1311954652348040E-05 4.4148895610198873E-04  
-1.6048158825939695E-04 -5.5972636623817186E-05 3.2417220067072777E-04  
-5.4402094778441745E-04 -4.0100244570732399E-04 -1.2499910234527181E-04  
-7.7915399056675645E-05 -1.6846202980673287E-04 -8.5077070101148992E-05  
-3.0476083758990846E-04 -2.3438582795996736E-04 1.0319891805743880E-04  
-4.0207979263826916E-04 -7.6127723256065333E-04 2.7982101227780158E-04  
3.6855414133375871E-04 3.8529205907644176E-05 6.8012651025235987E-04  
1.1219941356118985E-03 2.2033803884444620E-04 6.7035436948612330E-04  
2.7443958540529121E-04 4.0541758853017103E-04 1.0202808865661631E-03  
4.4277002329790543E-04 -5.9108251725825645E-04 2.4732486247671000E-04  
5.9498544475676432E-04 5.5859831967945423E-04 -1.0927587080276965E-03  
8.0789739332496634E-05 -2.3840811991558960E-04 6.8287623850200353E-04  
-1.2073434730233418E-05 -2.3147751304963111E-04 2.2720909583517955E-04  
-2.3445574951835700E-04 5.7273649852563524E-05 8.1603940172413891E-05  
6.6900910489598592E-05 -8.9561763521896266E-06 4.5398978359494437E-06  
-1.5990387337092474E-04 1.1060915094165988E-04 -2.0223236570086683E-04  
-3.6918381820473300E-04 1.3853375064191517E-04 1.9596292414613770E-04  
-3.3952485120739386E-04 -1.9074147226905226E-04 1.3045414277480452E-05  
-1.6182413888181991E-03 3.3805218969010573E-04 1.0130338145291459E-03  
7.5511156021886158E-04 -3.8567453320905061E-04 3.7533873404099868E-04  
-1.0628681637985539E-04 -9.1075849428986849E-04 -3.7765498767665590E-04  
-8.9186928291492597E-04 3.0056547329732622E-04 -7.8308418380694501E-04  
-2.4061182643871583E-04 -3.7667948421640513E-04 -3.9620859897573939E-04  
1.2309138556207687E-04 -4.2373420704442733E-04 1.0444665728076361E-03  
7.6147387328378104E-04 2.4650532486651363E-04 -2.1858186293557093E-04  
1.6362403583970489E-04 -7.2180259142213599E-04 -5.1527254593235531E-04  
5.7357450644358811E-05 4.9801700120635071E-05 -3.3596453356130219E-05  
5.8723369362525732E-06 -7.5197068593825300E-05 6.5721050958293808E-05  
-2.2678564924132139E-04 -3.0701790359979533E-04 -2.4408732608420522E-06  
-2.3784465469159260E-04 4.0331591289431674E-05 -7.7061265812687751E-05  
-9.6614145573906045E-05 -1.8356713096878956E-04 8.3682299438071888E-05  
2.0974703607202708E-04 -2.3447737529653476E-04 -6.0924874673281125E-05  
-1.1786753612624930E-04 -6.1507536686764203E-04 -9.2407575601050800E-04



-8.2213480768350729E-05 4.2750073695600949E-04 2.6176062175416501E-04  
2.4589765534254398E-04 -8.5130694516407659E-04 -2.6657086903434160E-04  
-1.0139622040452516E-04 1.0451815051808496E-05 -4.98438773735294878E-04  
1.2460957701937285E-03 -9.7155232529978308E-04 -7.1548505406121685E-04  
-7.1569202542055789E-04 1.2043420083326468E-03 -3.9152445602873114E-04  
-6.6565793042046610E-04 -3.7619049598296150E-04 -6.1716140481954457E-07  
4.4892991128582955E-04 2.1579947930455207E-04 -3.6162406743161217E-04  
1.0930454807964071E-04 -7.5497697724425855E-05 8.5433598010243992E-05  
-7.2759756656528313E-05 5.4898837665781833E-05 -3.9719448479372065E-05  
1.9875307809415511E-04 4.8098892897699598E-05 -2.4716313415065218E-04  
-2.7727086816415629E-05 2.8768033451351488E-04 6.2732195466150801E-05  
1.5807641339883533E-05 -1.1286544985213079E-04 2.9467406123392562E-04  
3.9930683545339130E-04 2.3333721463293487E-04 -9.3662845944810673E-05  
-1.0379384960080562E-03 -4.7597308068118220E-04 -4.1898598699161607E-04  
-4.3507983874238821E-04 -8.1367840525796106E-04 5.9083647164982333E-04  
-1.1287626491528104E-03 -2.7556380832587161E-04 4.5432321464802062E-04  
1.6396894536396171E-04 1.0543030641089791E-03 -4.4439528218058363E-04  
-1.1712762176708966E-04 8.0061663280763516E-04 -3.2859715521916654E-04  
4.3769163207600588E-04 7.6164980917717263E-05 -3.1438945807621148E-06  
4.2602641192464162E-04 6.1010556528266562E-04 -1.5006886461679820E-03  
1.4464270307431059E-03 -6.2409028815819999E-04 -4.5449717196043590E-04  
-2.7199339908679995E-04 1.8423718058706583E-04 -6.3267006336506341E-04  
1.2157942329583524E-04 -1.0207663723591727E-05 -3.5078326642021225E-04  
-1.2639911951814884E-04 -6.8055176651881828E-05 -8.2394276449338381E-05  
9.9478653914910988E-05 1.5967180991597208E-04 -1.9211078063314959E-06  
-5.1318460697791777E-05 2.0964144174777898E-04 -6.2455127256768109E-05  
2.5607036694565773E-04 -3.2156921517145173E-05 -3.1983429107923847E-04  
-7.6822367767333003E-05 -3.4590627481475677E-04 3.1788236595417708E-04  
-2.1303401422401291E-03 4.9851908129758824E-04 1.1045518180298739E-03  
-3.8083790019171352E-04 2.6855368202024544E-04 1.6039664230676186E-03  
4.3656760852241118E-04 1.1380515705208137E-03 -4.5111468376561565E-04  
4.2504347906402494E-04 -1.0376734862734818E-03 2.2377094644958174E-05  
-4.7578545770669763E-04 -2.4002162340893913E-05 -1.0155332310927542E-03  
-5.1993584483670625E-04 5.9007414621170572E-04 8.0778346856340096E-05  
-3.0526345529742526E-04 -1.4027009424162821E-04 -8.2252829091794175E-04  
-1.4131467383852363E-04 7.8186577884347688E-05 4.1490003183074705E-05  
-1.1959493159388174E-05 -3.0331354288719278E-05 -2.7729924281608788E-04  
4.5548052760411445E-04 7.9598267840300983E-05 1.1932159036262573E-04  
3.1129772630010168E-05 1.7098031342850778E-04 -4.3657978576068545E-04  
1.4146179550531571E-04 8.1778154241998868E-05 -3.6954111357635643E-05  
-1.1954152561565700E-04 6.7058014997064619E-05 -6.6241566706813236E-05  
-2.4827620129744325E-04 1.1442502104706620E-03 2.2909475863914310E-04  
1.6251346691067141E-03 -6.5441153831394608E-04 3.7719187784121603E-04  
1.092945536354940E-04 9.4484037938842591E-05 -9.7019231596859139E-04  
-9.0524627423999992E-05 2.9589759626508070E-04 4.8420516985234484E-04  
-1.2278895374079270E-03 1.2347718479050322E-04 -1.3020264751914109E-03  
-1.2593463756057233E-03 9.4724943814260948E-04 1.2306568357936987E-03  
4.0774166648918765E-05 3.7557630559760004E-04 -9.1505786049608391E-05  
-1.0606074829128092E-03 1.0033533487245664E-03 -8.1273386998435321E-06  
2.1764958604461314E-04 3.9416625102487713E-05 1.8920610763864483E-04  
-3.4648881815225160E-05 2.2767155687317166E-04 -5.4120737994478845E-04  
-9.0708384522833428E-04 -5.0535571382177985E-05 -2.0850772218666645E-04  
-3.9323626492692620E-05 3.7771831372076592E-04 -2.3608057026662226E-04  
-3.3989357250288450E-05 5.8040266790765295E-04 -1.9480318152922301E-04  
-7.2637385779238869E-06 -8.1052750551412574E-05 3.7254326675540181E-04  
9.2211875299408037E-04 2.7416836626425469E-04 3.9933104020867895E-04  
1.4265537426478667E-04 -5.7368880956101755E-04 -1.3082524071744497E-04  
-1.0677785526614070E-03 6.2913178861352627E-04 -9.9060339600854546E-04  
-2.6181581553261099E-04 -7.0362534208512985E-05 -5.0761786567633587E-04  
8.6145305341712563E-04 5.6284491978524152E-04 -6.4997749077325313E-04  
-6.2293684369331675E-04 -1.0969745478410884E-03 -9.8267336423844877E-05  
1.8074933414703609E-04 -1.9354216965055328E-03 -6.0772309375498718E-04  
9.0216271805096426E-04 6.2538557565596268E-04 3.8182108250470117E-04  
2.7924705062332345E-04 -2.3156871173539041E-04 -9.7527603835839203E-05  
7.3823446136572727E-05 1.4420596373168328E-05 -3.2254712509126608E-04  
-7.4807163663633878E-05 -8.0275966182403004E-05 -8.1301058176890795E-05  
1.2052425945115929E-04 -2.0239511934757256E-04 -1.3877106299141893E-04  
-5.4348797431577810E-05 -3.5679440500471592E-04 -5.0945834629988055E-04  
1.2308640568690885E-04 -1.2509775565376681E-04 -2.7622797330035750E-04  
-8.2050919712627036E-04 -1.3664529096734689E-04 -4.7661289356367017E-04  
4.5701537758005632E-04 -2.5231447796984286E-04 -7.0022807520655767E-04  
1.3475118360542580E-03 -9.2227279410248041E-04 6.6285172286654364E-04  
-1.2486087816602335E-03 -1.4984626171424900E-03 -7.3081133726257282E-05  
-7.8723605567788079E-04 -3.3211366868228840E-04 -9.4588684489129544E-04

|                          |                         |                         |
|--------------------------|-------------------------|-------------------------|
| -1.5506655147991518E-04  | 6.5532877604067242E-04  | -2.3073177550504275E-04 |
| 7.8413299012253224E-04   | -3.2916738522275902E-04 | -7.9997853648528460E-04 |
| -1.0197592677636134E-03  | 5.1621142602943247E-04  | -7.3209147131415343E-04 |
| -3.3442605584376993E-05  | 1.8481147912437689E-04  | 5.1189882287947094E-04  |
| -9.5287839160905868E-05  | 2.8805802588243640E-05  | -6.5615735593614396E-05 |
| 1.3771626183767561E-04   | -8.7977572969969242E-05 | -6.9195245642509010E-05 |
| -1.5656945469416972E-04  | -5.3138501363259433E-05 | 6.6857607645291018E-05  |
| 2.5557367701979202E-05   | -4.3656822184227602E-04 | 3.6530674675062193E-04  |
| 5.1589314341990300E-05   | -7.3762423129926431E-05 | 1.4360535741127581E-04  |
| -9.8170917949566257E-04  | -1.4824542463184841E-03 | 6.1249101939854359E-04  |
| 8.3409878764169397E-04   | 1.7698229562124846E-04  | -1.3057232155623793E-04 |
| -4.3732891538918666E-04  | -8.4971339446117899E-04 | 3.3668416946788370E-04  |
| 4.4984189703018720E-04   | -2.9780635188458176E-04 | -1.2498661610515866E-03 |
| 7.4585236740264669E-04   | 2.7662136127033624E-04  | 4.7598520093868616E-04  |
| 2.1606017307808611E-04   | -5.0590599967637528E-04 | -1.4235501024496781E-04 |
| 5.6102785037333823E-04   | 8.8147924584922114E-05  | -3.7671413571486860E-04 |
| -1.70874556928602569E-04 | 2.9525289632904573E-04  | -1.0896318688904776E-03 |
| -3.5600797515570942E-04  | -2.2235809584637701E-04 | 3.1607386305189356E-04  |
| 8.4528316776867366E-05   | -2.0852162268959276E-05 | 2.0251260082538202E-05  |
| 1.4121353811058984E-04   | -1.7968814076627142E-04 | -1.2426291001770191E-04 |
| -4.7875529056387947E-04  | 4.1622865936531697E-05  | 1.4861591850324295E-04  |
| 3.9929050040786663E-05   | -6.0420447527577612E-05 | -2.2086891015100219E-04 |
| 1.6729622444852559E-04   | 6.1760144103704994E-05  | -1.9308841577173698E-04 |
| 1.0987712496722116E-03   | 8.1804314516384315E-04  | 4.9111442037979213E-04  |
| -2.9008424238934847E-04  | -9.6127872912690922E-04 | -5.1795987277793360E-04 |
| -2.4280891624978677E-04  | -6.5340365711430946E-04 | -6.0043747645409102E-04 |
| 4.9175007711405657E-04   | 7.6611802227194697E-04  | 6.8674335400097011E-04  |
| 6.2694941837123747E-06   | 8.0044023378926022E-04  | -1.3031131920646997E-04 |
| -1.3470355034467629E-04  | -3.883305339994061E-04  | -2.8652219144073157E-05 |
| 7.4431627238667427E-04   | -4.5911615836201212E-04 | -6.0555560112251583E-04 |
| 1.0787798954419070E-03   | 5.0182671370894300E-04  | 1.6573348436771089E-04  |
| 3.7713345064074539E-05   | 2.7424973105781504E-04  | 1.5585300526385504E-04  |
| -1.0266368717586416E-04  | -3.4311619054667097E-05 | 2.3302756299245625E-04  |
| 5.0938993649040841E-05   | 2.3277157891629793E-04  | -1.6975947584410239E-04 |
| 2.3646129939385190E-04   | -5.6912467838380351E-04 | -9.2841858805103964E-05 |

&END VELOCITY

&KIND C

BASIS\_SET DZVP-MOLOPT-SR-GTH

POTENTIAL GTH-PBE-q4

&POTENTIAL

2 2

0.338471240000000E+00 2 -0.8803673979999999E+01 0.133921085000000E+01

2

0.302575750000000E+00 1 0.962248665000001E+01

0.291506940000000E+00 0

&END POTENTIAL

&END KIND

&KIND O

BASIS\_SET DZVP-MOLOPT-SR-GTH

POTENTIAL GTH-PBE-q6

&POTENTIAL

2 4

0.244554300000000E+00 2 -0.166672148000000E+02 0.248731132000000E+01

2

0.220955920000000E+00 1 0.183374581100000E+02

0.211332470000000E+00 0

&END POTENTIAL

&END KIND

&KIND H

BASIS\_SET DZVP-MOLOPT-SR-GTH

POTENTIAL GTH-PBE-q1

&POTENTIAL

1

0.200000000000000E+00 2 -0.417890044000000E+01 0.724463310000000E+00

0

&END POTENTIAL

&END KIND

&KIND Rh

BASIS\_SET DZVP-MOLOPT-SR-GTH

POTENTIAL GTH-PBE-q17

&POTENTIAL

3 6 8

0.420000000000000E+00 2 0.262067934000000E+02 -0.493738335000000E+01

3

```

0.345446220000000E+00 2 -0.452482320000000E+00 0.389280438000000E+01
-0.502558885000000E+01
0.378380140000000E+00 2 -0.941112419999999E+00 -0.569931000000000E-02
0.674351000000000E-02
0.433747250000000E+00 2 0.157423622000000E+01 -0.301217170000000E+01
0.341548166000000E+01
&END POTENTIAL
&END KIND
&KIND B
BASIS_SET DZVP-MOLOPT-SR-GTH
POTENTIAL GTH-PBE-q3
&END KIND
&TOPOLOGY
NUMBER_OF_ATOMS 780
MULTIPLE_UNIT_CELL 1 1 1
&END TOPOLOGY
&END SUBSYS
&END FORCE_EVAL

```

---

## Simulation S2

---

```

&GLOBAL
PRINT_LEVEL MEDIUM
PROJECT_NAME MD
RUN_TYPE MD
&END GLOBAL
&MOTION
&MD
ENSEMBLE NVT
STEPS 750
TIMESTEP 9.999999999999978E-01
STEP_START_VAL 5000
TIME_START_VAL 4.999999999995689E+03
ECONS_START_VAL -3.3824714789750383E+03
TEMPERATURE 3.000000000000000E+02
&THERMOSTAT
TYPE NOSE
REGION GLOBAL
&NOSE
LENGTH 4
YOSHIDA 3
MTS 2
&COORD
-2.2631887530026021E-01 1.3771861412010548E+01 6.0300772339181332E+00
3.0636929763953081E+01
&END COORD
&VELOCITY
-7.1656370278467617E-07 5.3308840457186362E-05 1.3335818563807413E-05
1.7363656282596911E-04
&END VELOCITY
&MASS
3.7021042250261183E+09 1.6237299232570694E+06 1.6237299232570694E+06
1.6237299232570694E+06
&END MASS
&FORCE
-2.5125118706431411E-11 5.8559673303749689E-10 2.2567323323886988E-09 -
4.0725608173426026E-10
&END FORCE
&END NOSE
&CSVR
TIMECON 9.999999999999986E+01
&END CSVR
&END THERMOSTAT
&AVERAGES T
&RESTART_AVERAGES
ITIMES_START 1
AVECPU 1.4783757815133711E+02
AVEHUGONIOT 0.000000000000000E+00
AVETEMP_BARO 0.000000000000000E+00
AVEPOT -3.3831612795156052E+03
AVEKIN 9.3099527417576555E-01
AVETEMP 2.5743856665699087E+02
AVEKIN_QM 0.000000000000000E+00

```

```

AVETEMP_QM      0.000000000000000E+00
AVEVOL          5.4800532563775429E+04
AVECELL_A      3.7983495271001452E+01
AVECELL_B      3.7983495271001452E+01
AVECELL_C      3.7983495271001452E+01
AVEALPHA       9.000000000000000E+01
AVEBETA        9.000000000000000E+01
AVEGAMMA       9.000000000000000E+01
AVE_ECONS      5.6058531947087200E+00
AVE_PRESS      0.000000000000000E+00
AVE_PXX        0.000000000000000E+00
&END RESTART_AVERAGES
&END AVERAGES
&END MD
&PRINT
&TRAJECTORY SILENT
  ADD_LAST NUMERIC
  LOG_PRINT_KEY T
  FORMAT DCD_ALIGNED_CELL
  &EACH
    MD 1
  &END EACH
&END TRAJECTORY
&VELOCITIES OFF
  ADD_LAST NUMERIC
  LOG_PRINT_KEY T
  FORMAT XMOL
  &EACH
    MD 1
  &END EACH
&END VELOCITIES
&RESTART SILENT
  ADD_LAST NUMERIC
  LOG_PRINT_KEY T
  BACKUP_COPIES 0
  &EACH
    MD 10
  &END EACH
&END RESTART
&END PRINT
&END MOTION
&FORCE_EVAL
METHOD QS
&DFT
  BASIS_SET_FILE_NAME insert basis set path here
  POTENTIAL_FILE_NAME insert basis set path here
  MULTIPLICITY 1
  CHARGE 0
  &SCF
    MAX_SCF 60
    EPS_SCF 9.999999999999995E-07
    SCF_GUESS ATOMIC
    &OT T
      MINIMIZER DIIS
      PRECONDITIONER FULL_SINGLE_INVERSE
    &END OT
    &OUTER_SCF T
      EPS_SCF 9.999999999999995E-07
      MAX_SCF 5
    &END OUTER_SCF
  &PRINT
    &RESTART SILENT
      ADD_LAST NUMERIC
      COMMON_ITERATION_LEVELS 1
      FILENAME =./WFN_restart.wfn
      LOG_PRINT_KEY T
    &EACH
      QS_SCF 0
    &END EACH
  &END RESTART
&END PRINT
&END SCF
&QS
  EPS_DEFAULT 9.999999999999998E-13

```

```

&END QS
&MGRID
  NGRIDS 5
  CUTOFF 3.000000000000000E+02
  REL_CUTOFF 5.000000000000000E+01
&END MGRID
&XC
  DENSITY_CUTOFF 1.000000000000000E-10
  GRADIENT_CUTOFF 1.000000000000000E-10
  TAU_CUTOFF 1.000000000000000E-10
  &XC_FUNCTIONAL NO_SHORTCUT
  &PBE T
  &END PBE
&END XC_FUNCTIONAL
&VDW_POTENTIAL
  POTENTIAL_TYPE PAIR_POTENTIAL
  &PAIR_POTENTIAL
  TYPE DFTD3(BJ)
  PARAMETER_FILE_NAME dftd3.dat
  REFERENCE_FUNCTIONAL PBE
  &END PAIR_POTENTIAL
&END VDW_POTENTIAL
&END XC
&POISSON
&END POISSON
&LOCALIZE T
&END LOCALIZE
&END DFT
&SUBSYS
&CELL
  A 2.0100000000000001E+01 0.000000000000000E+00 0.000000000000000E+00
  B 0.000000000000000E+00 2.0100000000000001E+01 0.000000000000000E+00
  C 0.000000000000000E+00 0.000000000000000E+00 2.0100000000000001E+01
  PERIODIC XYZ
  MULTIPLE_UNIT_CELL 1 1 1
&END CELL
&COORD
Rh 1.0396636922105996E+01 1.1029521772537862E+01 1.0990855317859909E+01
C 8.7010401779321747E+00 1.2720905006854606E+01 1.0949634592224202E+01
C 1.0742367257682579E+01 1.3725535780623117E+01 1.1870067427313105E+01
C 1.3685638688516727E+01 1.3033540553539035E+01 1.1963817619684045E+01
C 7.2283488170754344E+00 1.2262950567345840E+01 1.1020101631000374E+01
C 6.7418085993768031E+00 1.1641880851652283E+01 1.2229988191742963E+01
C 9.4573196763673266E+00 1.2862947494532818E+01 1.2111186297737779E+01
C 9.3275123498772299E+00 1.3367093731297558E+01 9.6816725702913526E+00
C 4.9550044998265239E+00 1.2036417400794068E+01 1.0165564703502790E+01
C 1.5794632405748780E+01 1.2977178873419849E+01 1.0865673267447365E+01
C 1.0368179395255162E+01 1.5065847174839091E+01 1.1197730875314878E+01
C 1.0645861298463021E+01 1.2599867379558544E+01 9.6537342511675419E+00
C 5.4598499721603915E+00 1.1124521325311575E+01 1.2358907008893970E+01
C 1.1474053279625613E+01 1.2914750652655002E+01 1.0780298991722129E+01
C 1.3700576270414761E+01 1.3064812056422427E+01 9.6142804110819533E+00
C 6.2233560862172395E+00 1.2526325151547592E+01 9.9896716548016986E+00
C 9.5030485533784930E+00 1.4844576445579431E+01 9.9244249770285293E+00
C 4.5244926956119240E+00 1.1346275173856304E+01 1.1272847563938262E+01
C 1.2913397466756127E+01 1.3045313399125479E+01 1.0765530389276817E+01
C 1.5120569322257152E+01 1.3127546305669464E+01 9.6157258683068889E+00
C 1.5080335064622275E+01 1.2952124709739849E+01 1.2058614461927087E+01
H 1.3162798619775106E+01 1.3036361294506662E+01 1.2917198963348117E+01
H 1.6891459620707138E+01 1.2960664220589692E+01 1.0954821734845309E+01
H 1.3233009168248808E+01 1.3194076226155689E+01 8.6496667379244574E+00
H 1.5591234852663627E+01 1.3174223783378604E+01 8.6714470262052803E+00
H 1.5490749521217680E+01 1.2748100351450507E+01 1.3028090346316365E+01
H 7.4386518308367746E+00 1.1455567946557023E+01 1.3062327173127867E+01
H 4.2240108512073347E+00 1.2430838121223767E+01 9.4110057069306166E+00
H 5.0899599138975908E+00 1.0588440824907389E+01 1.3197522134586064E+01
H 6.5473320600790537E+00 1.3081091779019134E+01 9.0771247579846310E+00
H 3.4887502027934461E+00 1.1137588473532205E+01 1.1390276920320959E+01
H 1.1430178346911280E+01 1.3822249845210644E+01 1.2749203953101599E+01
H 8.7208739549023324E+00 1.3046961333347499E+01 8.8011565007673394E+00
H 9.8774410224546099E+00 1.5751612744308352E+01 1.1951512456923151E+01
H 1.1261699093844037E+01 1.5598530503014992E+01 1.0984518598903596E+01
H 1.0029239669087209E+01 1.5321855817750093E+01 9.1177057112107267E+00
H 8.5118627677138630E+00 1.5206773023928653E+01 1.0115664206458606E+01

```

|   |                          |                        |                        |
|---|--------------------------|------------------------|------------------------|
| H | 1.1155640449501837E+01   | 1.2387889451213383E+01 | 8.6366757160294387E+00 |
| H | 9.2192564502526064E+00   | 1.2757790757984759E+01 | 1.3192379826918817E+01 |
| C | 1.1586917365660527E+01   | 9.7759080280306634E+00 | 9.7789624644434081E+00 |
| C | 1.2949182281427335E+01   | 9.9511171633586475E+00 | 9.5412789521294137E+00 |
| C | 1.1037861030223016E+01   | 8.6850507444805825E+00 | 9.0883476303761039E+00 |
| C | 1.3729918681173379E+01   | 9.2332663982632326E+00 | 8.6478961054123999E+00 |
| H | 1.3422759527619043E+01   | 1.0717435420934409E+01 | 1.0180813767600567E+01 |
| C | 1.1722092843124903E+01   | 7.9656594254046400E+00 | 8.1061484896797360E+00 |
| H | 9.9967711785951092E+00   | 8.3727434019744376E+00 | 9.2606955099657782E+00 |
| C | 1.3087552498632919E+01   | 8.2094615170884904E+00 | 7.9023945923110865E+00 |
| H | 1.4809871226782283E+01   | 9.3362087052789740E+00 | 8.7201703001337378E+00 |
| H | 1.1144823780333111E+01   | 7.2877856479158263E+00 | 7.4493367061668794E+00 |
| H | 1.3577726036736422E+01   | 7.6783802145322309E+00 | 7.1288420091525140E+00 |
| C | 1.0851657105264612E+01   | 9.1128340745631800E+00 | 1.2221005772107798E+01 |
| C | 9.5888416628368152E+00   | 9.6994180986975937E+00 | 1.2620098866084934E+01 |
| H | 1.0857900625515159E+01   | 8.2982253341570207E+00 | 1.1488121488950599E+01 |
| H | 8.6277112622473826E+00   | 9.4066159186710543E+00 | 1.2203823412193627E+01 |
| C | 9.4544586238219441E+00   | 1.0032365715195384E+01 | 1.4001366747095627E+01 |
| O | 8.3807186396310804E+00   | 1.0096293628670768E+01 | 1.4642287293120688E+01 |
| C | 1.0753151719077575E+01   | 1.0333153952302379E+01 | 1.4763021650975322E+01 |
| H | 1.0465497530106893E+01   | 1.1214964894538088E+01 | 1.5324957488859928E+01 |
| C | 1.2107521453153916E+01   | 9.3182021794808776E+00 | 1.2964418750281556E+01 |
| C | 1.1964817553391274E+01   | 1.0468803993406773E+01 | 1.3916071986149165E+01 |
| H | 1.0884929495786746E+01   | 9.5411224807099284E+00 | 1.5471335409611301E+01 |
| H | 1.1882222661907869E+01   | 1.1395460308464218E+01 | 1.3318703153971908E+01 |
| H | 1.28657441111139053E+01  | 1.0517997934038553E+01 | 1.4576098784930313E+01 |
| H | 1.2296511746959634E+01   | 8.3914478215700949E+00 | 1.3511657758610824E+01 |
| H | 1.2981325233197476E+01   | 9.3781479984417651E+00 | 1.2281078402760544E+01 |
| H | 1.4808870815414526E+01   | 6.7074892686022860E+00 | 1.4214509773141126E+01 |
| O | 1.8722859484541850E+01   | 1.9330476555537210E+01 | 7.3704719361107536E+00 |
| H | 1.7949861093444941E+01   | 1.8747294404679597E+01 | 7.2049142270772411E+00 |
| H | 1.9438759995674129E+01   | 1.8659732416891078E+01 | 7.4797921732808277E+00 |
| O | 1.5347203593802236E+01   | 7.3252740332083288E+00 | 1.3693584490321523E+01 |
| H | 1.6159988368782869E+01   | 6.8402727033426771E+00 | 1.3609794845551233E+01 |
| O | 1.3862749015667200E+01   | 1.7186345167374711E+01 | 1.1287988422937367E+01 |
| B | 5.6067766278856439E+00   | 9.5674679100115334E+00 | 1.7569825967187796E+01 |
| O | 6.4995168547471991E+00   | 1.2857282686116234E+01 | 6.2175239559804467E+00 |
| O | 6.2965751799565108E+00   | 9.1955804963626271E+00 | 1.6402633246360431E+01 |
| H | 1.3784218217615837E+01   | 1.7379067189338976E+01 | 1.0330407749966991E+01 |
| H | 1.4155880672799773E+01   | 1.6283914649332939E+01 | 1.1246916202349691E+01 |
| O | 4.7747251151983807E+00   | 3.7073972164647109E+00 | 1.1916887528866118E+01 |
| O | 6.1522298160073445E+00   | 1.0274681927365545E+01 | 1.8631882931641762E+01 |
| O | 4.3313577969765156E+00   | 9.0570170271459780E+00 | 1.7683890124091526E+01 |
| H | 5.0824543141036322E+00   | 2.8283807091168423E+00 | 1.1801509781517531E+01 |
| H | 5.5275832896969437E+00   | 1.0151430185594750E+01 | 1.9400068529133112E+01 |
| H | 4.2560208526186871E+00   | 8.6209854616491910E+00 | 1.6863755123903005E+01 |
| H | 5.4772562257655872E+00   | 4.3404770068978786E+00 | 1.2160923106284196E+01 |
| H | 6.5008524604807539E+00   | 1.1933161913941586E+01 | 3.9987128847706352E+00 |
| H | 7.0703033620442266E+00   | 9.7055102805918398E+00 | 1.6216366426575220E+01 |
| H | 7.3609389799819525E+00   | 1.3243086834104110E+01 | 6.0077634129542625E+00 |
| H | 6.8313910701905805E+00   | 9.8632483178286705E+00 | 9.6863387580551823E+00 |
| H | 8.6838295574669750E+00   | 8.1791418569024437E+00 | 8.0014777570604600E+00 |
| H | 7.9106285216513967E+00   | 7.7749357403517658E+00 | 9.4833595417586167E+00 |
| O | 2.7303709936875831E+00   | 1.7218661302681102E+01 | 1.1470881668314448E+00 |
| O | 1.6076881019871023E+00   | 1.5255804306009836E+01 | 2.8459018381010863E+00 |
| C | 8.1766473794653582E-01   | 1.6286343291829699E+01 | 2.2571687948088082E+00 |
| C | 3.0439795996234684E+00   | 1.5452789945507243E+01 | 2.8491294913562806E+00 |
| C | 3.4242918926402579E+00   | 1.5995076546775650E+01 | 1.4532767539132603E+00 |
| C | 1.3701021171298846E+00   | 1.6836350331832051E+01 | 9.9005595512554645E-01 |
| H | 4.4645567574615219E+00   | 1.6282869661710134E+01 | 1.2551179595133590E+00 |
| H | 3.2683442607467237E+00   | 1.5278000019533632E+01 | 5.9948902320084474E-01 |
| H | 3.5362373492336561E+00   | 1.4482502442925162E+01 | 3.0822147732044547E+00 |
| H | 3.3051555714461500E+00   | 1.6275448148797892E+01 | 3.5157381750301600E+00 |
| H | 7.5773406945944277E-01   | 1.7673404491531407E+01 | 7.5240182997610028E-01 |
| H | 1.3372497425354595E+00   | 1.6059081271620826E+01 | 2.5457672469392484E-01 |
| H | 6.8353597893015861E-01   | 1.7153612608217923E+01 | 2.8868804408130795E+00 |
| H | -7.40641405540114030E-02 | 1.5682904663203745E+01 | 1.9886665743542504E+00 |
| O | 1.0984616680656803E+01   | 9.4878007305223999E+00 | 2.0618391995795658E+01 |
| O | 8.7558531187217774E+00   | 1.1153425976831883E+01 | 2.0444907034025974E+01 |
| C | 8.8737319552001441E+00   | 1.0013009625344973E+01 | 1.9580304535472919E+01 |
| C | 1.0019389538512648E+01   | 1.1636313240560586E+01 | 2.0830829813550135E+01 |
| C | 1.0827338884285936E+01   | 1.0613720787318352E+01 | 2.1489150599394815E+01 |
| C | 9.6462785876818167E+00   | 8.9400815183541251E+00 | 2.0273778618411399E+01 |
| H | 1.1839823011995135E+01   | 1.0937495765939005E+01 | 2.1733896481605104E+01 |

|   |                        |                        |                        |
|---|------------------------|------------------------|------------------------|
| H | 1.0320181863410449E+01 | 1.0308493493044093E+01 | 2.2392859424348622E+01 |
| H | 9.7903224521543564E+00 | 1.2471384671005559E+01 | 2.1501197046451871E+01 |
| H | 1.56807487533597E+01   | 1.2069401054554060E+01 | 1.9966963332243900E+01 |
| H | 9.8182252068725546E+00 | 8.0336040676823810E+00 | 1.9670668423086390E+01 |
| H | 9.1602116391075512E+00 | 8.6660710186218566E+00 | 2.1181598838082429E+01 |
| H | 9.4340244135537024E+00 | 1.0249261454547847E+01 | 1.8632664298331772E+01 |
| H | 7.8094723370656123E+00 | 9.7496262777627951E+00 | 1.9222941172408607E+01 |
| O | 1.6850602669139050E+01 | 1.6911992699927570E+01 | 6.9196283236152940E+00 |
| O | 1.7590769853689409E+01 | 1.4047183663553335E+01 | 6.9752232077628396E+00 |
| C | 1.8028013188710343E+01 | 1.5038517094638925E+01 | 7.9858129132141791E+00 |
| C | 1.7550425901928087E+01 | 1.4697368418769608E+01 | 5.7323489404957781E+00 |
| C | 1.663593122008697E+01  | 1.5983491070354495E+01 | 5.8918628791594720E+00 |
| C | 1.7019580939334123E+01 | 1.6142781948222407E+01 | 8.1493499613653135E+00 |
| H | 1.6799034358437940E+01 | 1.6575434630767106E+01 | 4.9405949378722438E+00 |
| H | 1.5544737852950888E+01 | 1.5753958386515842E+01 | 5.8277023627622775E+00 |
| H | 1.7042738587490433E+01 | 1.3927652284405223E+01 | 5.1289535344477031E+00 |
| H | 1.8540918992093239E+01 | 1.5008745207084282E+01 | 5.3686238415679544E+00 |
| H | 1.7493476102130028E+01 | 1.6759026366864816E+01 | 8.9373335363648216E+00 |
| H | 1.6001183121433158E+01 | 1.5804259937698323E+01 | 8.4600371775918735E+00 |
| H | 1.8964778120632271E+01 | 1.5575826886076555E+01 | 7.7198039290430938E+00 |
| H | 1.8167739574653911E+01 | 1.4431450890982626E+01 | 8.8591071330252999E+00 |
| O | 6.5025463305984275E+00 | 1.9266505291991642E+01 | 1.6683891113300060E+01 |
| O | 4.7715499285908871E+00 | 2.1248685348927758E+01 | 1.7694704553589069E+01 |
| C | 4.2670045949831747E+00 | 2.0386798985292689E+01 | 1.6699062753096850E+01 |
| C | 6.2020611416490556E+00 | 2.1499288205864318E+01 | 1.7527248818523404E+01 |
| C | 6.9182108685715642E+00 | 2.0178501830392218E+01 | 1.7781936586775558E+01 |
| C | 5.0445316970695080E+00 | 1.9062426633175932E+01 | 1.6713000318373258E+01 |
| H | 7.9928329187936269E+00 | 2.0331991413016066E+01 | 1.7578928164656300E+01 |
| H | 6.6838077856237339E+00 | 1.9782201569514950E+01 | 1.8821295085880198E+01 |
| H | 6.5460083057750840E+00 | 2.2229899945583245E+01 | 1.8320927456043655E+01 |
| H | 6.4985427827838924E+00 | 2.1833712905449648E+01 | 1.6512028587462030E+01 |
| H | 4.7008839192426226E+00 | 1.8348678383917385E+01 | 1.5943409094421574E+01 |
| H | 4.8383716421339926E+00 | 1.8544817585151236E+01 | 1.7713783827438125E+01 |
| H | 4.4446574782927808E+00 | 2.0873027593572079E+01 | 1.5688627730808435E+01 |
| H | 3.2214380487507799E+00 | 2.0182366708261696E+01 | 1.6928003250609045E+01 |
| O | 1.6574623827568885E+01 | 2.0784580901764603E+01 | 1.1719391524135736E+01 |
| O | 1.7653917579091033E+01 | 1.8235195177693914E+01 | 1.2608432902270289E+01 |
| C | 1.7591479727086899E+01 | 1.8569116187484575E+01 | 1.1245674674369187E+01 |
| C | 1.6502849230076354E+01 | 1.8864028093920961E+01 | 1.3193800643264764E+01 |
| C | 1.6407147984259030E+01 | 2.0436990035633830E+01 | 1.3065975500101711E+01 |
| C | 1.7667834798771427E+01 | 2.0058151603742811E+01 | 1.1064598675258509E+01 |
| H | 1.5372512101475278E+01 | 2.0762413703674131E+01 | 1.3387349559213384E+01 |
| H | 1.7175816141758055E+01 | 2.0884242459966455E+01 | 1.3763133467640905E+01 |
| H | 1.6567245451645025E+01 | 1.8706480890131473E+01 | 1.4290550946734339E+01 |
| H | 1.5583586256740887E+01 | 1.8333364574523831E+01 | 1.2812242010963953E+01 |
| H | 1.7516159846185513E+01 | 2.0302948847808619E+01 | 1.0029492794151347E+01 |
| H | 1.8667672557737248E+01 | 2.0420095735619824E+01 | 1.1441295922828051E+01 |
| H | 1.6760034975402020E+01 | 1.8012953648891994E+01 | 1.0710122654636942E+01 |
| H | 1.8524082298535717E+01 | 1.8293128938144985E+01 | 1.0716480302476405E+01 |
| O | 1.9193124590751260E+01 | 3.2037507639116800E+00 | 1.8483546348603888E+01 |
| O | 2.0477188647703361E+01 | 7.0662674829000260E-01 | 1.7700923011934137E+01 |
| C | 2.1179534241511444E+01 | 1.7040187652922356E+00 | 1.8400680939394551E+01 |
| C | 1.9520740601236049E+01 | 1.3292811916872382E+00 | 1.6870443927826155E+01 |
| C | 1.8530888586650210E+01 | 2.1499118869477618E+00 | 1.7734266475942729E+01 |
| C | 2.0283867598122473E+01 | 2.6722053608680305E+00 | 1.9236346282813905E+01 |
| H | 1.7800521202599878E+01 | 2.6272626304891165E+00 | 1.7074231398351728E+01 |
| H | 1.7951379440753072E+01 | 1.4179894675633056E+00 | 1.8471095322206377E+01 |
| H | 1.8848950097952219E+01 | 5.5997831420380373E-01 | 1.6436685497311213E+01 |
| H | 1.9997419360570849E+01 | 1.9034822418223805E+00 | 1.6084137880829100E+01 |
| H | 2.0793743899928923E+01 | 3.4895019861212813E+00 | 1.9648525520293113E+01 |
| H | 1.9957188835779192E+01 | 2.0581354176024562E+00 | 2.0133929176335577E+01 |
| H | 2.1664686916150536E+01 | 2.3262521442078539E+00 | 1.7640287822869567E+01 |
| H | 2.1887666047394529E+01 | 1.1797280384585018E+00 | 1.9095699172780648E+01 |
| O | 1.3862717750727402E+01 | 4.8887616995538323E+00 | 1.5090632552516603E+01 |
| O | 1.3038841459516897E+01 | 2.1863909101348469E+00 | 1.5055240863329908E+01 |
| C | 1.4033380047021499E+01 | 2.6669015767400155E+00 | 1.5941825321245039E+01 |
| C | 1.3002320868591319E+01 | 2.9744731932550752E+00 | 1.3783885801718629E+01 |
| C | 1.2868105729145274E+01 | 4.4506477116151668E+00 | 1.4084219451031696E+01 |
| C | 1.3752059854202251E+01 | 4.1398736760524395E+00 | 1.6294591948360221E+01 |
| H | 1.3133355056407433E+01 | 4.9601053829240493E+00 | 1.3141998926161039E+01 |
| H | 1.1857422852406989E+01 | 4.7281191368468738E+00 | 1.4368107782765387E+01 |
| H | 1.2110391721001298E+01 | 2.5827885582111030E+00 | 1.3343591331813778E+01 |
| H | 1.3964759453229659E+01 | 2.8783065209167100E+00 | 1.3257051984101958E+01 |
| H | 1.4495874601057588E+01 | 4.6154154317810399E+00 | 1.6922040276366221E+01 |

|   |                         |                        |                         |
|---|-------------------------|------------------------|-------------------------|
| H | 1.2800649661750462E+01  | 4.3120513795807778E+00 | 1.6724935341002201E+01  |
| H | 1.4994416204518677E+01  | 2.6916510516909971E+00 | 1.5376326465457637E+01  |
| H | 1.4026953830893181E+01  | 1.9902032156947471E+00 | 1.6891229575388127E+01  |
| O | 1.4719464093490616E+01  | 4.6837527432389496E+00 | 1.0727923977127061E+01  |
| O | 1.2339582820102395E+01  | 3.7030028272599917E+00 | 9.3505009396879686E+00  |
| C | 1.2482409603490236E+01  | 5.0798253275797443E+00 | 9.8841154192955702E+00  |
| C | 1.3275778658187416E+01  | 2.8128694238449476E+00 | 1.0021358095053156E+01  |
| C | 1.4735898836662900E+01  | 3.3162576460169091E+00 | 1.0101966645210720E+01  |
| C | 1.3933800559176271E+01  | 5.5193957991320604E+00 | 9.9179866603626170E+00  |
| H | 1.5363072540676592E+01  | 2.5813848473234917E+00 | 1.0608062766286563E+01  |
| H | 1.5204524549885528E+01  | 3.3946711444097590E+00 | 9.0761243634700630E+00  |
| H | 1.3261084217453222E+01  | 1.8915786052345087E+00 | 9.3413297789973342E+00  |
| H | 1.2811599739037135E+01  | 2.5418429054594385E+00 | 1.1039040638295251E+01  |
| H | 1.3993225442840210E+01  | 6.5115754815673448E+00 | 1.0321645199341296E+01  |
| H | 1.4285850588116011E+01  | 5.5546520429725303E+00 | 8.8701023702818969E+00  |
| H | 1.2130533572181351E+01  | 5.1167590141542538E+00 | 1.0945723657324214E+01  |
| H | 1.1843699252004718E+01  | 5.7234692014052415E+00 | 9.2413048512208515E+00  |
| O | 1.2085761658283335E+01  | 1.4749012060097519E+01 | 1.9625389601848308E+01  |
| O | 1.4433548628754272E+01  | 1.5890020401487705E+01 | 2.0960962827414150E+01  |
| C | 1.3693253622073591E+01  | 1.4771837304757483E+01 | 2.1580340413758005E+01  |
| C | 1.3628371701888586E+01  | 1.6578256526690438E+01 | 2.0039530168269430E+01  |
| C | 1.2914953564971162E+01  | 1.5725653170525680E+01 | 1.9010123330885289E+01  |
| C | 1.2945975680836291E+01  | 1.3929333874754148E+01 | 2.0435407615327087E+01  |
| H | 1.2240986466065129E+01  | 1.6467385856242853E+01 | 1.8435829994093787E+01  |
| H | 1.3564712317773504E+01  | 1.5346860611180364E+01 | 1.8182915301577026E+01  |
| H | 1.4204144519251189E+01  | 1.7324712636945598E+01 | 1.9523140248752483E+01  |
| H | 1.2791780950297358E+01  | 1.7203177340818574E+01 | 2.0526383398806409E+01  |
| H | 1.2260598819624748E+01  | 1.3096489473627560E+01 | 2.0941241218370980E+01  |
| H | 1.3711432205824075E+01  | 1.3379589795432715E+01 | 1.9884517300568564E+01  |
| H | 1.2939127768153110E+01  | 1.5231427960928047E+01 | 2.2267478257062329E+01  |
| H | 1.4304878157080880E+01  | 1.4123516315644297E+01 | 2.2198567737719451E+01  |
| O | 5.340853839533398E+00   | 6.7386571930000576E+00 | 1.9686483854987962E+00  |
| O | 7.8197328506710431E+00  | 6.1136822362322745E+00 | 7.1745222557017352E-01  |
| C | 6.7031078819243755E+00  | 6.6936135755007289E+00 | 2.5555070680615154E-02  |
| C | 7.5305285869023866E+00  | 5.5661066487477058E+00 | 2.0138560890299093E+00  |
| C | 6.4845786000892867E+00  | 6.4655858389149747E+00 | 2.7375357850421231E+00  |
| C | 5.7575729134426830E+00  | 7.5727289430491753E+00 | 8.4461521615410262E-01  |
| H | 6.0571021867412824E+00  | 5.9988824792888487E+00 | 3.6723086840357628E+00  |
| H | 6.9502199535383093E+00  | 7.4019027918186131E+00 | 3.0669292712120502E+00  |
| H | 8.5029349775671399E+00  | 5.6649142715867464E+00 | 2.5303119951370925E+00  |
| H | 7.2327568723392783E+00  | 4.5093993759218272E+00 | 1.8758529479967168E+00  |
| H | 4.8840213104672516E+00  | 7.9231370151531966E+00 | 3.3404867849008413E-01  |
| H | 6.3602652804537394E+00  | 8.4614756756511795E+00 | 1.1940694917439527E+00  |
| H | 6.0672957779382086E+00  | 5.8802461823810841E+00 | -4.2655621488368783E-01 |
| H | 7.1970745530457298E+00  | 7.2215251978289885E+00 | -8.2407564741172068E-01 |
| O | 7.7975626108949633E-02  | 1.0586032774647808E+01 | 6.5222845844438799E+00  |
| O | 2.7524117553703009E+00  | 1.0042933904407793E+01 | 5.4496455726898363E+00  |
| C | 2.4141504027359177E+00  | 1.1357824450341361E+01 | 5.9083501295813932E+00  |
| C | 1.5911767249741455E+00  | 9.3461844347756795E+00 | 4.8843091967589860E+00  |
| C | 5.9601152154761661E-01  | 9.3588007002433855E+00 | 5.9781256944869252E+00  |
| C | 1.2861511962751486E+00  | 1.1234746911769378E+01 | 6.9288612725168530E+00  |
| H | -3.6258988722736613E-01 | 8.8522372801189206E+00 | 5.7749042111737223E+00  |
| H | 1.1303204615009363E+00  | 8.7881691864425111E+00 | 6.7812438714174599E+00  |
| H | 1.8459623438888859E+00  | 8.3394827756252941E+00 | 4.5771580692914231E+00  |
| H | 1.2808844502076311E+00  | 9.9338861269981713E+00 | 3.9970368277461312E+00  |
| H | 9.2454391496045663E-01  | 1.2251901560270337E+01 | 7.0813826140635960E+00  |
| H | 1.6883751400512454E+00  | 1.0820547748592276E+01 | 7.8297590849671979E+00  |
| H | 2.2385417826126113E+00  | 1.2048239175809558E+01 | 5.0574644474514603E+00  |
| H | 3.3214954910219618E+00  | 1.1707873998027136E+01 | 6.4346401383612433E+00  |
| O | 1.7350677849322352E+01  | 8.1103809505016855E+00 | 8.0846264044593816E+00  |
| O | 1.7799874595583645E+01  | 9.6385736835197182E+00 | 1.0439185317263982E+01  |
| C | 1.6861159395828640E+01  | 8.5854566922059004E+00 | 1.0488444182639197E+01  |
| C | 1.7850071327399249E+01  | 1.0245562092130353E+01 | 9.1452804797402241E+00  |
| C | 1.8253352184138862E+01  | 9.2277585057492217E+00 | 8.0858798727492527E+00  |
| C | 1.7220508328137495E+01  | 7.5162051691977396E+00 | 9.4222550327986259E+00  |
| H | 1.8290391220458346E+01  | 9.5946607607038423E+00 | 7.0569292240338264E+00  |
| H | 1.9279816484731587E+01  | 8.9161772229015295E+00 | 8.3048000209434267E+00  |
| H | 1.8587271601960079E+01  | 1.1039762423080735E+01 | 9.3524709388571310E+00  |
| H | 1.6894291621824305E+01  | 1.0722092548202065E+01 | 8.9047527083206557E+00  |
| H | 1.6434617369124346E+01  | 6.8115101344297120E+00 | 9.3025588414112974E+00  |
| H | 1.8223367638927296E+01  | 7.0474868076968731E+00 | 9.7588618551598909E+00  |
| H | 1.5813267094374044E+01  | 8.9992183171269087E+00 | 1.0324841461959275E+01  |
| H | 1.6895186638388619E+01  | 8.1361595280581138E+00 | 1.1460232788627994E+01  |
| O | 1.0924877705492126E+01  | 5.3662751528238442E+00 | 2.5575987620808491E+00  |



|   |                        |                        |                        |
|---|------------------------|------------------------|------------------------|
| O | 1.2285112410071784E+01 | 6.9178853957134505E+00 | 4.4981334687297059E+00 |
| C | 1.1775689632671442E+01 | 5.6081711644679348E+00 | 4.8160259003992678E+00 |
| C | 1.1641254333348773E+01 | 7.5052676941559904E+00 | 3.2999154450542068E+00 |
| C | 1.1555940360520980E+01 | 6.5710977066190672E+00 | 2.1133724623757342E+00 |
| C | 1.1816400551652695E+01 | 4.8019217771075366E+00 | 3.5826890118853854E+00 |
| H | 1.0937032903142592E+01 | 7.0406263154574162E+00 | 1.3634744985493170E+00 |
| H | 1.2589497175732555E+01 | 6.3923755745629061E+00 | 1.7712115316718806E+00 |
| H | 1.2168093515428497E+01 | 8.4190822399004634E+00 | 3.0329313983615549E+00 |
| H | 1.0622654706975865E+01 | 7.7211587570519882E+00 | 3.6008085057113965E+00 |
| H | 1.1404838562315305E+01 | 3.8253137802762045E+00 | 3.7420601894736762E+00 |
| H | 1.2805328842633829E+01 | 4.7337986199920916E+00 | 3.2127699783342960E+00 |
| H | 1.0744336891943382E+01 | 5.5954701260134412E+00 | 5.2669337182846201E+00 |
| H | 1.2458893947233198E+01 | 5.2566607505078986E+00 | 5.6013270639836001E+00 |
| O | 1.9173796948357637E+01 | 1.9126910965577089E+01 | 2.2436716846632788E+01 |
| O | 1.6623738507904932E+01 | 1.8638683198967268E+01 | 2.1141597104209193E+01 |
| C | 1.6944755770636579E+01 | 1.8032351512668328E+01 | 2.2354354350828146E+01 |
| C | 1.7857634418112116E+01 | 1.8920931059857100E+01 | 2.0462788614001671E+01 |
| C | 1.8832586303160301E+01 | 1.9825572466479283E+01 | 2.1231884913061442E+01 |
| C | 1.7970559769020571E+01 | 1.8873201305929360E+01 | 2.3072586650197724E+01 |
| H | 1.9777305363465455E+01 | 1.9961900133086804E+01 | 2.0683048071829948E+01 |
| H | 1.8378961378377447E+01 | 2.0756480193599991E+01 | 2.1534360420800198E+01 |
| H | 1.7555480400235233E+01 | 1.9329569443013110E+01 | 1.9508431557430569E+01 |
| H | 1.8383281905037094E+01 | 1.7980123304229281E+01 | 2.0288956538075944E+01 |
| H | 1.8257413874579957E+01 | 1.8300149670306112E+01 | 2.3953638964072297E+01 |
| H | 1.7442840688495188E+01 | 1.9844441150220337E+01 | 2.3375632021054759E+01 |
| H | 1.7328140489544669E+01 | 1.7018076752255425E+01 | 2.2190399494311883E+01 |
| H | 1.6089994644606545E+01 | 1.7981628956349475E+01 | 2.3045378077438869E+01 |
| O | 1.3216978851992129E+01 | 9.2349607023594498E+00 | 1.7479540033938409E+01 |
| O | 1.5736850409830112E+01 | 8.1844121161233776E+00 | 1.8303946203920340E+01 |
| C | 1.4986430536630273E+01 | 7.5653443621279575E+00 | 1.7173405011825377E+01 |
| C | 1.4841920431360441E+01 | 8.6561787349006281E+00 | 1.9295000008617311E+01 |
| C | 1.3973836195185026E+01 | 9.7520820595065043E+00 | 1.8640908574620912E+01 |
| C | 1.4018371788826840E+01 | 8.5272230465944077E+00 | 1.6534500467360026E+01 |
| H | 1.3130631931026397E+01 | 1.0185585935633796E+01 | 1.9208539679428554E+01 |
| H | 1.4622515754459855E+01 | 1.0577566263046759E+01 | 1.8248563913995181E+01 |
| H | 1.5548183061183687E+01 | 9.0602951073837481E+00 | 1.9985053017814618E+01 |
| H | 1.4203867779466661E+01 | 7.8325971448798590E+00 | 1.9714346408761120E+01 |
| H | 1.3272124317338138E+01 | 7.9760329558307603E+00 | 1.5883576883665219E+01 |
| H | 1.4532208146518135E+01 | 9.1766417596148102E+00 | 1.5796202546706827E+01 |
| H | 1.4459592264206368E+01 | 6.6404728599229710E+00 | 1.7500432527815182E+01 |
| H | 1.5780040449910775E+01 | 7.3935096385695571E+00 | 1.6430987797720825E+01 |
| O | 3.8937261279597841E+00 | 5.8168056819902452E+00 | 1.5093587034326514E+01 |
| O | 2.0571788184175488E+00 | 4.8649634846391603E+00 | 1.7059277456953041E+01 |
| C | 3.3193964157012603E+00 | 5.4390734296663554E+00 | 1.7503197844929389E+01 |
| C | 2.1612356094642560E+00 | 4.1382163174229154E+00 | 1.5733664282587357E+01 |
| C | 2.6870309001703245E+00 | 5.0907713500730800E+00 | 1.4667022884607904E+01 |
| C | 3.8714818234582586E+00 | 6.3676596120659807E+00 | 1.6391357954169035E+01 |
| H | 2.9311154108433435E+00 | 4.4532392084140504E+00 | 1.3756732222457533E+01 |
| H | 1.9329760244739635E+00 | 5.8185925570963040E+00 | 1.4302989740262420E+01 |
| H | 1.1361547216875763E+00 | 3.7902639629740142E+00 | 1.5563291387466956E+01 |
| H | 2.8558001912835560E+00 | 3.2850224956476373E+00 | 1.5894865335442764E+01 |
| H | 4.9231532645186933E+00 | 6.6248168465871853E+00 | 1.6745657527678059E+01 |
| H | 3.1740228158469566E+00 | 7.2285963490751870E+00 | 1.6392963602852209E+01 |
| H | 3.9798003899806043E+00 | 4.6000363948282432E+00 | 1.7702422174168696E+01 |
| H | 3.1401586475168566E+00 | 6.0290994465620784E+00 | 1.8442260224660973E+01 |
| O | 9.0456416694667521E+00 | 4.4197577174494453E+00 | 1.2399425452653492E+01 |
| O | 6.4470536755990624E+00 | 5.6927570460962631E+00 | 1.2479983873116183E+01 |
| C | 7.2481969353891067E+00 | 5.6808337384069887E+00 | 1.1323345861300343E+01 |
| C | 7.2494258965565361E+00 | 5.5064011851536705E+00 | 1.3711782388467862E+01 |
| C | 8.0939653930524553E+00 | 4.2533893463507875E+00 | 1.3563309314593498E+01 |
| C | 8.1359721054708096E+00 | 4.4809119842958740E+00 | 1.1164164374978647E+01 |
| H | 8.8174667925370631E+00 | 4.0641549111366491E+00 | 1.4406520975940207E+01 |
| H | 7.5268180385596768E+00 | 3.3807317261643122E+00 | 1.3316476489328615E+01 |
| H | 6.5807147772151451E+00 | 5.3643253472428745E+00 | 1.4570102767447008E+01 |
| H | 7.8507955213372735E+00 | 6.3906672768861528E+00 | 1.3937693031035664E+01 |
| H | 8.8623195903862939E+00 | 4.6392499574003185E+00 | 1.0392498479756165E+01 |
| H | 7.6904422495639775E+00 | 3.5078355624313677E+00 | 1.0973439564576017E+01 |
| H | 7.9353250363103607E+00 | 6.5613620208692165E+00 | 1.1249939272409900E+01 |
| H | 6.5185153326107468E+00 | 5.6559925204086863E+00 | 1.0451250873387563E+01 |
| O | 1.0987697016507671E+01 | 1.3851704346328583E+01 | 1.5353898976297717E+01 |
| O | 1.3400247527844069E+01 | 1.5431684831997211E+01 | 1.5523880010920248E+01 |
| C | 1.2364393978437040E+01 | 1.5777963507596109E+01 | 1.4577995480715037E+01 |
| C | 1.3466635857167404E+01 | 1.3983416107495438E+01 | 1.5685980970033411E+01 |
| C | 1.2118825042171586E+01 | 1.3478211156669255E+01 | 1.6216588595797692E+01 |

|   |                         |                         |                        |
|---|-------------------------|-------------------------|------------------------|
| C | 1.0997967547611996E+01  | 1.5255924043025791E+01  | 1.5037155873210855E+01 |
| H | 1.2105043724775241E+01  | 1.2389202447520136E+01  | 1.6175421603374293E+01 |
| H | 1.1866572530814866E+01  | 1.3753898475669599E+01  | 1.7271206708628011E+01 |
| H | 1.4261403252992585E+01  | 1.3733285199038704E+01  | 1.6370497305833627E+01 |
| H | 1.3619383447930813E+01  | 1.3556623848814148E+01  | 1.4678008644855911E+01 |
| H | 1.0250607405752216E+01  | 1.5343946368252691E+01  | 1.4251857985357240E+01 |
| H | 1.0723777219327539E+01  | 1.5973905728994421E+01  | 1.5821731744416692E+01 |
| H | 1.2556450925531893E+01  | 1.5471952190747871E+01  | 1.3556476865156737E+01 |
| H | 1.2364494671820568E+01  | 1.6898420388750782E+01  | 1.4588570190088202E+01 |
| O | 1.6387505437276517E+00  | 2.7782924965774134E+00  | 1.0128206401424547E+01 |
| O | -4.4874963480067526E-01 | 4.8278213805074666E+00  | 1.0187697500147323E+01 |
| C | 8.1663097945316931E-01  | 5.0549863654453429E+00  | 1.0797767791442270E+01 |
| C | -7.5170541029581184E-01 | 3.4163450195939995E+00  | 1.0223059151704827E+01 |
| C | 3.6166010575458746E-01  | 2.5252717311738340E+00  | 9.5191362606735161E+00 |
| C | 1.9275933206761724E+00  | 4.1607806851098967E+00  | 1.0097708497116065E+01 |
| H | 3.6653111941666691E-02  | 1.5226498807241662E+00  | 9.8018364770849402E+00 |
| H | 5.3782670037445879E-01  | 2.6175783570083433E+00  | 8.4457665692584136E+00 |
| H | -1.7871535426829515E+00 | 3.2782739778481607E+00  | 9.8154955390467400E+00 |
| H | -7.3349698017466636E-01 | 3.0026784676906537E+00  | 1.1199205917997505E+01 |
| H | 2.9530345661320245E+00  | 4.3014722492381621E+00  | 1.0595527791672012E+01 |
| H | 2.0369591861936396E+00  | 4.4637749049163356E+00  | 9.0782893543375653E+00 |
| H | 8.5645997568150167E-01  | 4.7388033490437174E+00  | 1.1854826473674525E+01 |
| H | 1.0439965304239907E+00  | 6.0826258135687175E+00  | 1.0700421610477100E+01 |
| O | 7.0687707998393021E+00  | 1.2270598586879748E+00  | 1.2518668032961559E+01 |
| O | 9.4248751067936496E+00  | -3.2655049326290747E-01 | 1.3079178812001739E+01 |
| C | 8.7508616509150254E+00  | 4.2879553779322277E-01  | 1.4100192609347850E+01 |
| C | 9.3798775899350471E+00  | 4.7513421377300369E-01  | 1.1832796586674922E+01 |
| C | 7.8902145933195333E+00  | 6.1875038791158787E-01  | 1.1499233963834271E+01 |
| C | 7.2317896238679138E+00  | 5.1869396400859591E-01  | 1.3790108330265516E+01 |
| H | 7.6321483308999785E+00  | 1.0519445618129828E+00  | 1.0500093658666668E+01 |
| H | 7.4977444826154551E+00  | -4.6000253103583011E-01 | 1.1452695425340236E+01 |
| H | 9.7618440850934807E+00  | -2.2919006179199655E-01 | 1.0974594106870482E+01 |
| H | 9.8548625501258282E+00  | 1.3744220623617254E+00  | 1.2073499300865141E+01 |
| H | 6.8107301054141480E+00  | 1.1777218051409493E+00  | 1.4533753033716412E+01 |
| H | 6.7722323290093422E+00  | -4.8363557008233998E-01 | 1.3711653370831801E+01 |
| H | 9.2617928766448472E+00  | 1.3779723426707651E+00  | 1.4254572158362114E+01 |
| H | 9.0279656758994022E+00  | -2.0377692397907179E-01 | 1.5006366631622994E+01 |
| O | 1.7335560431083085E+01  | 3.6911775796593340E+00  | 1.4620076039922385E+01 |
| O | 1.7987891709637733E+01  | 6.4822502611236521E+00  | 1.3865993451711665E+01 |
| C | 1.7965624124302444E+01  | 5.3263427377927490E+00  | 1.2920516886710869E+01 |
| C | 1.8166890867938729E+01  | 5.8290705988835931E+00  | 1.5184582931141209E+01 |
| C | 1.7055148222252317E+01  | 4.7736273125307802E+00  | 1.5491167465708353E+01 |
| C | 1.6999300388065759E+01  | 4.1218111509622375E+00  | 1.3293459258593661E+01 |
| H | 1.7211418571333308E+01  | 4.5071311747664877E+00  | 1.6557957994691346E+01 |
| H | 1.6017522341082717E+01  | 5.1108998506495231E+00  | 1.5309273786512898E+01 |
| H | 1.8150035710047394E+01  | 6.6513400099517241E+00  | 1.5845780210550608E+01 |
| H | 1.917773063680988E+01   | 5.4005273036716428E+00  | 1.5234559154497708E+01 |
| H | 1.7355859696217028E+01  | 3.2847128862816648E+00  | 1.2695621875230616E+01 |
| H | 1.5925842642589359E+01  | 4.3732243190036089E+00  | 1.3187774732384197E+01 |
| H | 1.8949851401955993E+01  | 4.9273558829912414E+00  | 1.3012386782942901E+01 |
| H | 1.7660871810250018E+01  | 5.6564339617176218E+00  | 1.1931620372421067E+01 |
| O | -1.4238416281284974E-01 | 8.6341476380766906E+00  | 1.9016960095900856E+01 |
| O | 5.8991827933747747E-01  | 6.2514113356091778E+00  | 2.0406482971153583E+01 |
| C | -7.4901130520861570E-01 | 6.5134187180992775E+00  | 1.9877389216922751E+01 |
| C | 1.1882048365797226E+00  | 7.5399465916555908E+00  | 2.0686603897737438E+01 |
| C | 1.1965443768584920E+00  | 8.4231477878805361E+00  | 1.9502169651202713E+01 |
| C | -6.1621642719658398E-01 | 7.3584092695393464E+00  | 1.8655231647436786E+01 |
| H | 1.5433373185748833E+00  | 9.4246863304117099E+00  | 1.9727220600834240E+01 |
| H | 1.8539492494239755E+00  | 8.0293180757005764E+00  | 1.8728320379624289E+01 |
| H | 2.2272392094074247E+00  | 7.3532973205188483E+00  | 2.1045793536087967E+01 |
| H | 7.3022825989078444E-01  | 8.1142749828112510E+00  | 2.1551409883312786E+01 |
| H | -1.5503198000127976E+00 | 7.5641778573910710E+00  | 1.8090693279775042E+01 |
| H | 5.3330350993270978E-02  | 6.8754910261464248E+00  | 1.7901654976702105E+01 |
| H | -1.2877883415590925E+00 | 7.0371472804656170E+00  | 2.0646804113462181E+01 |
| H | -1.2063582226420064E+00 | 5.5385006556751515E+00  | 1.9661810317718864E+01 |
| O | 1.4463140096294323E+01  | 1.8952273094313181E+01  | 4.1364326150166519E+00 |
| O | 1.2178124235502661E+01  | 2.0173783836808962E+01  | 2.6897125925838830E+00 |
| C | 1.2973821351657080E+01  | 2.0903999375942821E+01  | 3.5942991279992076E+00 |
| C | 1.2212016063359735E+01  | 1.8808698817476248E+01  | 2.9797453207141653E+00 |
| C | 1.3641792118104423E+01  | 1.8265417168275558E+01  | 3.2517258188546201E+00 |
| C | 1.4357378740367233E+01  | 2.0350780155025181E+01  | 3.7598966048947906E+00 |
| H | 1.3429010962128190E+01  | 1.7232941052913922E+01  | 3.5492482060963026E+00 |
| H | 1.4065861451088429E+01  | 1.8119372626518718E+01  | 2.2360253643743988E+00 |
| H | 1.1812193023799372E+01  | 1.8293721580650548E+01  | 2.0927168826245883E+00 |

|   |                         |                        |                         |
|---|-------------------------|------------------------|-------------------------|
| H | 1.1525152085362839E+01  | 1.8523555881058400E+01 | 3.8439305321758410E+00  |
| H | 1.4838935885183371E+01  | 2.0899736914371694E+01 | 4.5892048217857511E+00  |
| H | 1.4903504736968905E+01  | 2.0556221697160371E+01 | 2.8352146859650778E+00  |
| H | 1.2390405940054398E+01  | 2.1027662967513045E+01 | 4.5134070225527960E+00  |
| H | 1.3190516065444845E+01  | 2.1948554199975032E+01 | 3.2143339227133443E+00  |
| O | 7.6571456406952567E+00  | 3.8202166610537684E+00 | 8.0990905058923328E+00  |
| O | 8.1535977226170218E+00  | 2.9501887829568179E+00 | 5.4300257391257167E+00  |
| C | 7.9445164541694053E+00  | 4.3606623633679815E+00 | 5.729245924222238E+00   |
| C | 7.3112034536323316E+00  | 2.1715226490325046E+00 | 6.3718198396129750E+00  |
| C | 7.7466723980903760E+00  | 2.4061047261712747E+00 | 7.7943117500030725E+00  |
| C | 8.3510402925452834E+00  | 4.6703221667141896E+00 | 7.1725934386057908E+00  |
| H | 7.1817428956713547E+00  | 1.8361613414119222E+00 | 8.6107219886334647E+00  |
| H | 8.8404206912524792E+00  | 2.1187076525105919E+00 | 7.9888964955035044E+00  |
| H | 7.5231090267636009E+00  | 1.1256808312741196E+00 | 6.1308552109482841E+00  |
| H | 6.1972329150058831E+00  | 2.4349408783820339E+00 | 6.2573107811328912E+00  |
| H | 8.1396195732945209E+00  | 5.7307623878869638E+00 | 7.4655438802195837E+00  |
| H | 9.4261220805904777E+00  | 4.4231983588452701E+00 | 7.3720904487407166E+00  |
| H | 6.8668448887615900E+00  | 4.6536635767721890E+00 | 5.6403236597915232E+00  |
| H | 8.5722994501581198E+00  | 4.9671080863763484E+00 | 5.0184014847923226E+00  |
| O | 1.7037673399246604E+01  | 3.9144001464880325E+00 | 7.0506473163817551E+00  |
| O | 1.7494325125989999E+01  | 2.4118445814197398E+00 | 4.62926745193909509E+00 |
| C | 1.6676680194863934E+01  | 3.6198275180721198E+00 | 4.7343753044003103E+00  |
| C | 1.7438908150783409E+01  | 1.7944512921584999E+00 | 5.9306563347848016E+00  |
| C | 1.7817394996666469E+01  | 2.7216315082111118E+00 | 7.0921991279999332E+00  |
| C | 1.17176491814382871E+01 | 4.6212689595528627E+00 | 5.7950976385012760E+00  |
| H | 1.7581670097977135E+01  | 2.2846938951250841E+00 | 8.0559979717793748E+00  |
| H | 1.8882459275444486E+01  | 2.9766863627178677E+00 | 7.1440322305872543E+00  |
| H | 1.8112673716345796E+01  | 9.4491347843770335E-01 | 6.0201286951652380E+00  |
| H | 1.6358792958314062E+01  | 1.4728948770091070E+00 | 6.0779606277985945E+00  |
| H | 1.6630811856126293E+01  | 5.5965498294776301E+00 | 5.9026973220889385E+00  |
| H | 1.8225768041570554E+01  | 4.8224201019760482E+00 | 5.5639083859180918E+00  |
| H | 1.5622874145622591E+01  | 3.2657261016102752E+00 | 5.0593845507089128E+00  |
| H | 1.6622468002496646E+01  | 3.9012800605085949E+00 | 3.7040309015770823E+00  |
| O | -1.3642732352744973E+00 | 9.5533285708729760E+00 | 1.5826785474893697E+01  |
| O | -2.8028635186876065E+00 | 1.2003058604220060E+01 | 1.5367796945973549E+01  |
| C | -1.9927925663256572E+00 | 1.1825901872805439E+01 | 1.6592056462080759E+01  |
| C | -3.2638268203846463E+00 | 1.0752276362018268E+01 | 1.4951170730181964E+01  |
| C | -2.1089710473742969E+00 | 9.7355490626512537E+00 | 1.4650652858787888E+01  |
| C | -8.064219232771287E-01  | 1.0830988400466939E+01 | 1.6213406522669572E+01  |
| H | -2.5305311937185260E+00 | 8.7652906643789734E+00 | 1.4402636076701457E+01  |
| H | -1.5264088556178441E+00 | 1.0142846486125496E+01 | 1.3833178233639719E+01  |
| H | -3.8829533476943321E+00 | 1.1000697949189602E+01 | 1.4048411861942196E+01  |
| H | -3.9231993748812544E+00 | 1.0283731067093825E+01 | 1.5695609247574234E+01  |
| H | -1.1227953674611339E-01 | 1.0702552524288603E+01 | 1.7032323017818072E+01  |
| H | -2.1153897863004956E-01 | 1.1215665668626487E+01 | 1.5340833208916642E+01  |
| H | -2.5942157026398065E+00 | 1.1404636910460381E+01 | 1.7380081675628201E+01  |
| H | -1.6795881720448962E+00 | 1.2820244263331350E+01 | 1.6859851960537391E+01  |
| O | 2.4927003827398386E+00  | 1.4806126407242136E+01 | 7.8069722447706358E+00  |
| O | 6.9562212215379204E-01  | 1.7000015813401077E+01 | 7.5883053243970027E+00  |
| C | 1.2367350865814890E+00  | 1.6354654942534264E+01 | 6.4324750826686570E+00  |
| C | 1.5454704519419942E+00  | 1.6898152265455401E+01 | 8.7278481935587013E+00  |
| C | 1.9804245729767780E+00  | 1.5439344821201757E+01 | 8.9484747342505280E+00  |
| C | 1.5852450625353030E+00  | 1.4888328557400552E+01 | 6.6809645194141059E+00  |
| H | 2.8008660426130740E+00  | 1.5526305932224659E+01 | 9.6615099865301186E+00  |
| H | 1.2030195714120662E+00  | 1.4805490191439581E+01 | 9.4545823830410765E+00  |
| H | 8.8433404972140361E-01  | 1.7269964132455971E+01 | 9.5117885320469693E+00  |
| H | 2.3730289461521075E+00  | 1.7657294683481762E+01 | 8.6563835588868336E+00  |
| H | 2.1431862045156911E+00  | 1.4505763081239722E+01 | 5.8241523941643223E+00  |
| H | 7.2373099337521918E-01  | 1.4333731861792248E+01 | 6.8983218374804034E+00  |
| H | 2.1104730324368579E+00  | 1.6883829124402432E+01 | 5.9727644588006621E+00  |
| H | 4.0054242748855506E-01  | 1.6328571005652485E+01 | 5.7206410369194174E+00  |
| O | 1.3241549275493593E+01  | 1.9019775830398505E+01 | 1.7632181435646913E+01  |
| O | 1.0546701579211923E+01  | 1.9736209278967198E+01 | 1.7566916678981809E+01  |
| C | 1.1197416207295548E+01  | 1.9430820810528189E+01 | 1.8843995735708521E+01  |
| C | 1.1191479168390897E+01  | 1.8958492254318475E+01 | 1.6526513656998219E+01  |
| C | 1.2663224427951723E+01  | 1.9272734329440620E+01 | 1.6420042461875916E+01  |
| C | 1.2692240616909425E+01  | 1.9837092871742435E+01 | 1.8648904228664282E+01  |
| H | 1.3068326763807347E+01  | 1.8702197590059424E+01 | 1.5589063717791481E+01  |
| H | 1.2795024921687542E+01  | 2.0301195445569277E+01 | 1.6209561870579609E+01  |
| H | 1.0644740983391859E+01  | 1.9157274907204215E+01 | 1.5553109819741914E+01  |
| H | 1.1099631800249783E+01  | 1.7881053512635589E+01 | 1.7624136540827324E+01  |
| H | 1.3298901029106887E+01  | 1.9667007667212388E+01 | 1.9567116578168520E+01  |
| H | 1.2765228953664273E+01  | 2.0874358783272520E+01 | 1.8470357408655882E+01  |
| H | 1.1112308679769090E+01  | 1.8338103649771128E+01 | 1.9189813950528148E+01  |

|   |                        |                         |                        |
|---|------------------------|-------------------------|------------------------|
| H | 1.0727922661243431E+01 | 2.0045070813081473E+01  | 1.9632822515407987E+01 |
| O | 1.0002252467785050E+01 | 1.5889618302137002E+01  | 3.1382434232394032E+00 |
| O | 8.6668397631146394E+00 | 1.4048328233038220E+01  | 4.7173247826251581E+00 |
| C | 7.9134735937122676E+00 | 1.4752077789073997E+01  | 3.6685316751163808E+00 |
| C | 9.7852533462051046E+00 | 1.4921660957865669E+01  | 5.1659379229061599E+00 |
| C | 1.0746543158002607E+01 | 1.5060280316564748E+01  | 4.0380251420735718E+00 |
| C | 8.8886110882052520E+00 | 1.5136046614004133E+01  | 2.5805466305800473E+00 |
| H | 1.1694899747340417E+01 | 1.5574662233790832E+01  | 4.2704790093489624E+00 |
| H | 1.0927219810121889E+01 | 1.4093487150562590E+01  | 3.5554057659892044E+00 |
| H | 1.0305252801701602E+01 | 1.4363194925370536E+01  | 5.9774055149836460E+00 |
| H | 9.3189917381245593E+00 | 1.5866306273559642E+01  | 5.4888852545930238E+00 |
| H | 8.3841000454553694E+00 | 1.5787416519745856E+01  | 1.8579398706684720E+00 |
| H | 9.2590762038468117E+00 | 1.4330513445181179E+01  | 1.9082342154404814E+00 |
| H | 7.5278877219449072E+00 | 1.5652846938390665E+01  | 4.1865055791558321E+00 |
| H | 7.0205531748879864E+00 | 1.4165064095851253E+01  | 3.3858585679776616E+00 |
| O | 3.0495390866677203E+00 | 8.5570023187201176E+00  | 9.8084263270550114E+00 |
| O | 2.2554904760332830E+00 | 7.4024759795960922E+00  | 1.2234669506138905E+01 |
| C | 1.4147111745569301E+00 | 8.4618851130530128E+00  | 1.1719129277990016E+01 |
| C | 3.6680204787035477E+00 | 7.4746223015746134E+00  | 1.1871689822602370E+01 |
| C | 3.7500319264057307E+00 | 7.3880111258638657E+00  | 1.0308839316882377E+01 |
| C | 1.6394658701245732E+00 | 8.6208405255091307E+00  | 1.0172533191407457E+01 |
| H | 4.7996356249711374E+00 | 7.4467989284274356E+00  | 9.9838963634304303E+00 |
| H | 3.3641350516977102E+00 | 6.5091223730844829E+00  | 9.8040219879993913E+00 |
| H | 4.1665623331142267E+00 | 6.7118914228795150E+00  | 1.2473256870182800E+01 |
| H | 4.0408675146348507E+00 | 8.4563595320728560E+00  | 1.2176277823604259E+01 |
| H | 1.2442852260414299E+00 | 9.6129396019733235E+00  | 9.8440637715788153E+00 |
| H | 1.1739630130033776E+00 | 7.8438299180672546E+00  | 9.5839256422675287E+00 |
| H | 1.6528422524908553E+00 | 9.4030113961143531E+00  | 1.2249122271231915E+01 |
| H | 3.7984023432716135E-01 | 8.1151352114489388E+00  | 1.2022966658241081E+01 |
| O | 5.6252493855035706E+00 | 2.1435909498119345E+00  | 2.0761089707220361E+01 |
| O | 2.9102142224924488E+00 | 1.3942037175737816E+00  | 2.1119127819471665E+01 |
| C | 3.8545223005341449E+00 | 3.8939706718118011E-01  | 2.0789830002868097E+01 |
| C | 3.3230050456279288E+00 | 2.7310317240723765E+00  | 2.0594035828696633E+01 |
| C | 4.6418220906625303E+00 | 3.1433305994492495E+00  | 2.117245169113069E+01  |
| C | 5.2649252047928536E+00 | 8.5682284990689717E-01  | 2.1317188457813351E+01 |
| H | 4.8484511151327014E+00 | 4.1045361219485672E+00  | 2.0685751629452287E+01 |
| H | 4.6500108296901423E+00 | 3.2431966815565736E+00  | 2.2238839302509163E+01 |
| H | 2.5261760567916771E+00 | 3.4453966766738144E+00  | 2.0798577773187461E+01 |
| H | 3.4487750075549783E+00 | 2.6067834346281713E+00  | 1.9489558461904558E+01 |
| H | 6.0324831119853846E+00 | 1.6205046714252949E-01  | 2.0895022403823106E+01 |
| H | 5.4132147996189985E+00 | 8.8896039689001705E-01  | 2.2421317174203942E+01 |
| H | 3.8793106509269890E+00 | 1.9823285522228695E-01  | 1.9707244753051715E+01 |
| H | 3.5552203490779410E+00 | -5.0911461440673456E-01 | 2.1350775637880783E+01 |
| O | 1.3972242754457063E+00 | 2.1230000874423933E+01  | 6.2713103881562260E+00 |
| O | 3.2610381122224115E+00 | 1.9551522833855337E+01  | 5.2229019942253458E+00 |
| C | 3.4300191600382228E+00 | 2.0131593985681310E+01  | 6.5140407833496337E+00 |
| C | 2.5209275454963178E+00 | 2.0414107021169393E+01  | 4.3502751994889124E+00 |
| C | 1.2267700502530408E+00 | 2.0592935174720193E+01  | 5.0286395049961898E+00 |
| C | 2.1080053020870189E+00 | 2.0379528523253569E+01  | 7.1845507547700702E+00 |
| H | 5.4153946061309965E-01 | 2.1236381099178921E+01  | 4.4624432276276718E+00 |
| H | 7.6918620635079216E-01 | 1.9602459180174961E+01  | 5.0674520599981241E+00 |
| H | 2.5197849100500882E+00 | 1.9961650176820626E+01  | 3.3827680041770614E+00 |
| H | 3.0694502930533409E+00 | 2.1393610572780982E+01  | 4.3776700080343574E+00 |
| H | 2.2290385137075370E+00 | 2.1002339617201908E+01  | 8.1201471915874581E+00 |
| H | 1.5491728223475221E+00 | 1.9438869564497868E+01  | 7.2324261643429013E+00 |
| H | 3.8540746925531546E+00 | 2.1163316400863003E+01  | 6.3840855243581771E+00 |
| H | 4.1087259647464025E+00 | 1.9464782841348388E+01  | 7.1008107942027081E+00 |
| O | 2.2655585347000091E+00 | 4.4275375619594612E+00  | 6.5248986515935687E+00 |
| O | 2.4267864078933106E+00 | 6.0089931261123022E+00  | 4.2814143495367682E+00 |
| C | 1.7253735665981285E+00 | 4.7731961232747890E+00  | 4.0825505202909715E+00 |
| C | 3.5924519233300756E+00 | 5.8447131648544115E+00  | 5.0167100839245107E+00 |
| C | 3.2091087408843686E+00 | 5.4985933327353234E+00  | 6.4508994178857515E+00 |
| C | 1.2478901230595363E+00 | 4.4481733666287031E+00  | 5.4897419621465122E+00 |
| H | 3.9791579234659817E+00 | 5.2449985746680179E+00  | 7.1853515299432624E+00 |
| H | 2.7654533157032546E+00 | 6.4206884760155187E+00  | 6.8325239242382034E+00 |
| H | 4.1840221024020625E+00 | 6.7684942339580418E+00  | 4.7981095997317871E+00 |
| H | 4.2802243484506102E+00 | 5.1274478940393449E+00  | 4.4790893560190019E+00 |
| H | 6.5803942913646252E-01 | 3.4973472489435662E+00  | 5.6110252023195990E+00 |
| H | 5.7339885597642126E-01 | 5.2373881336927779E+00  | 5.8012720957085229E+00 |
| H | 2.2331056838245260E+00 | 3.9110481315624965E+00  | 3.6677421104547769E+00 |
| H | 7.8007022441643226E-01 | 5.0234933437859164E+00  | 3.5545741674277163E+00 |
| O | 3.9738659646828660E+00 | 1.0593711172822614E+01  | 1.0207957884171877E+00 |
| O | 4.8447729690320038E+00 | 1.2852328153583551E+01  | 2.4664702786998220E+00 |
| C | 4.9152263773392271E+00 | 1.2744258554645663E+01  | 9.7993607515581216E-01 |

|   |                         |                        |                         |
|---|-------------------------|------------------------|-------------------------|
| C | 4.8160397924859426E+00  | 1.1479778527074794E+01 | 3.0406104380001424E+00  |
| C | 3.6846238607716639E+00  | 1.0654857466195827E+01 | 2.3880878094803397E+00  |
| C | 3.7620924085542131E+00  | 1.1931718907968712E+01 | 4.5214327641315555E-01  |
| H | 3.7303538537085874E+00  | 9.6185404574046558E+00 | 2.7658462484606114E+00  |
| H | 2.6847777352815547E+00  | 1.1000194079363204E+01 | 2.6708120664417874E+00  |
| H | 4.5095347018950926E+00  | 1.1712812166644378E+01 | 4.0690156804893096E+00  |
| H | 5.7810786644386045E+00  | 1.0945272044218163E+01 | 2.9843747226654780E+00  |
| H | 3.7608189164769992E+00  | 1.1825262782151512E+01 | -6.8494776404415714E-01 |
| H | 2.7247783347933154E+00  | 1.2161907889460775E+01 | 6.5339744506828656E-01  |
| H | 5.8176696257015790E+00  | 1.2229019741294513E+01 | 6.4727475980306770E-01  |
| H | 4.9439367613712770E+00  | 1.3760183961558562E+01 | 6.0177769369330381E-01  |
| O | 1.8474581685632881E+01  | 9.0378851875808532E+00 | 2.3869759855009942E+01  |
| O | 1.6448696321452452E+01  | 6.9022666889021194E+00 | 2.3742641863632656E+01  |
| C | 1.7762452451488212E+01  | 6.7501182981863472E+00 | 2.3196902720163866E+01  |
| C | 1.6123433286446982E+01  | 8.3361772197371344E+00 | 2.3814799383807152E+01  |
| C | 1.7185177326793042E+01  | 9.1523792714810561E+00 | 2.4533555871196651E+01  |
| C | 1.8775084169975571E+01  | 7.6417138631265047E+00 | 2.3917296856098002E+01  |
| H | 1.6947115717608039E+01  | 1.0218449755562915E+01 | 2.4561624659292029E+01  |
| H | 1.7257799479869202E+01  | 8.7579009317430696E+00 | 2.5531619253227710E+01  |
| H | 1.5151906100590942E+01  | 8.3694837123023493E+00 | 2.4304487401338104E+01  |
| H | 1.6077595718045046E+01  | 8.7520338074525093E+00 | 2.2762879656957644E+01  |
| H | 1.9745497805310865E+01  | 7.5971489001963155E+00 | 2.3454741036670345E+01  |
| H | 1.8957777601845638E+01  | 7.4468963194633240E+00 | 2.4961966779480033E+01  |
| H | 1.7683268817276126E+01  | 6.9099200707649766E+00 | 2.2119181880293720E+01  |
| H | 1.7997355515755366E+01  | 5.6345150396811485E+00 | 2.3327986811749874E+01  |
| O | 7.2904174576213006E+00  | 1.5698755540332414E+01 | 1.1927200504698760E+01  |
| O | 5.0546918621307215E+00  | 1.6302349617252787E+01 | 1.3504105429201475E+01  |
| C | 5.1413483210263227E+00  | 1.6833011321426628E+01 | 1.2128595513216204E+01  |
| C | 6.3556047492658880E+00  | 1.6060098330101514E+01 | 1.4111100250808896E+01  |
| C | 7.2330958167165340E+00  | 1.5166151546869465E+01 | 1.3282292276710525E+01  |
| C | 6.0221732632608989E+00  | 1.5860460469816131E+01 | 1.1365553682060609E+01  |
| H | 8.2750929733494978E+00  | 1.5177052596407256E+01 | 1.3665408802485512E+01  |
| H | 6.9039807535029274E+00  | 1.4107720010202520E+01 | 1.3210626297723850E+01  |
| H | 6.0915871157903840E+00  | 1.5569131933834708E+01 | 1.5018265223595757E+01  |
| H | 6.9357640021094786E+00  | 1.7046491910231040E+01 | 1.4292822310492038E+01  |
| H | 6.1779438427256137E+00  | 1.6269921472054062E+01 | 1.0348476640691549E+01  |
| H | 5.4975155471539230E+00  | 1.4945086826585317E+01 | 1.1116839581298491E+01  |
| H | 5.5421149257141247E+00  | 1.7855907865535929E+01 | 1.2079323340956108E+01  |
| H | 4.0329900777193428E+00  | 1.6881709538849329E+01 | 1.1756612693259694E+01  |
| O | 2.3122203355425199E+00  | 1.9010989993886493E+01 | 1.4176243790234738E+01  |
| O | 1.1184274532205287E+00  | 1.9324060061658852E+01 | 1.1712931733732781E+01  |
| C | 1.7115974646787941E+00  | 1.8054036882677952E+01 | 1.2096674475029038E+01  |
| C | 1.7630704064419864E+00  | 2.0453478638438483E+01 | 1.2416141488064170E+01  |
| C | 1.6439425130902676E+00  | 2.0202993057213792E+01 | 1.3877046460845216E+01  |
| C | 1.7902220613302340E+00  | 1.7858154776320639E+01 | 1.3577896251262713E+01  |
| H | 2.0815040580394788E+00  | 2.0999132527894837E+01 | 1.4560944115425231E+01  |
| H | 6.3583436928568315E-01  | 2.0151306567242258E+01 | 1.4212421676876991E+01  |
| H | 1.2201343696368394E+00  | 2.1291466284913675E+01 | 1.1933673365762367E+01  |
| H | 2.7953238467165575E+00  | 2.0593964305156980E+01 | 1.2144422060269973E+01  |
| H | 2.3891978393373114E+00  | 1.7008095607301165E+01 | 1.3950885907310246E+01  |
| H | 7.6004131155324917E-01  | 1.7681901086233967E+01 | 1.4014557109018519E+01  |
| H | 2.7496849466374917E+00  | 1.8037522191700894E+01 | 1.1706227042309104E+01  |
| H | 1.14912527113945794E+00 | 1.7304936807965515E+01 | 1.1518414573674793E+01  |
| O | 3.2819223150387349E+00  | 1.4917700644065102E+01 | 1.5863544756369876E+01  |
| O | 3.0729961261157221E+00  | 1.2399835053633970E+01 | 1.7271655164553835E+01  |
| C | 2.9148652993749038E+00  | 1.2450606758909322E+01 | 1.5836339797578280E+01  |
| C | 2.4427619829633000E+00  | 1.3678416340413870E+01 | 1.7766351434951492E+01  |
| C | 3.2058872210047138E+00  | 1.4880087688877655E+01 | 1.7283202542827532E+01  |
| C | 3.6265368292994471E+00  | 1.3659499876964727E+01 | 1.5276731028717659E+01  |
| H | 2.5967716951136657E+00  | 1.5767220984685935E+01 | 1.7571380642135921E+01  |
| H | 4.1829065831979948E+00  | 1.4783075070489573E+01 | 1.7786037601527131E+01  |
| H | 2.5233424139376246E+00  | 1.3692562917904011E+01 | 1.8867579494918179E+01  |
| H | 1.3920021139541923E+00  | 1.3573922496045855E+01 | 1.7512129623390994E+01  |
| H | 3.550885093381233E+00   | 1.3807913776706950E+01 | 1.4177686495320099E+01  |
| H | 4.7230637305959835E+00  | 1.3467060024124004E+01 | 1.5468199793909672E+01  |
| H | 1.8004589758285288E+00  | 1.2409242889857488E+01 | 1.5581456166122956E+01  |
| H | 3.4011566730703171E+00  | 1.1584929058124517E+01 | 1.5389395019336678E+01  |
| O | 9.0221151678317266E+00  | 2.0477285002344310E+01 | 4.0172590713251193E+00  |
| O | 7.9140548220466984E+00  | 1.9471525497994136E+01 | 1.5443171190490668E+00  |
| C | 8.4566087484611288E+00  | 1.8612385611788838E+01 | 2.5934676841338433E+00  |
| C | 8.5688356951982794E+00  | 2.0814201878380054E+01 | 1.6592490821671202E+00  |
| C | 8.5322754362559063E+00  | 2.1400311514923057E+01 | 3.0056874021691820E+00  |
| C | 8.3844780789488844E+00  | 1.9215291503086885E+01 | 4.0106885073939260E+00  |
| H | 9.1648814376937953E+00  | 2.2279341901822644E+01 | 3.0003404473057214E+00  |

|   |                        |                        |                        |
|---|------------------------|------------------------|------------------------|
| H | 7.5607997676482768E+00 | 2.1775154759851297E+01 | 3.2579973862991287E+00 |
| H | 7.9905513324683737E+00 | 2.1424973390275824E+01 | 9.5897001406695503E-01 |
| H | 9.6870281608104580E+00 | 2.0679358825711979E+01 | 1.4173768378713960E+00 |
| H | 8.9993280947362866E+00 | 1.8643937574622733E+01 | 4.7181311394876833E+00 |
| H | 7.3439516641721445E+00 | 1.9290633119499827E+01 | 4.4304472318636190E+00 |
| H | 9.5644802370924626E+00 | 1.8461004477506023E+01 | 2.4248696945569099E+00 |
| H | 7.9435984266948143E+00 | 1.7649680473489664E+01 | 2.5532952461215093E+00 |
| O | 1.1621229310567077E+01 | 1.9067899558081947E+01 | 7.1151282095356505E+00 |
| O | 1.3554498500201412E+01 | 1.7318662140826067E+01 | 8.2152321380410349E+00 |
| C | 1.3953694382496060E+01 | 1.8600653147797320E+01 | 7.7241220389643130E+00 |
| C | 1.2558199237385155E+01 | 1.6749222287408784E+01 | 7.3631481257287152E+00 |
| C | 1.1341405249467753E+01 | 1.7708946707201385E+01 | 7.3555293824121231E+00 |
| C | 1.2786008467659098E+01 | 1.9608089630915870E+01 | 7.7415555155155404E+00 |
| H | 1.0554855523724688E+01 | 1.7396780373803985E+01 | 6.6184818704389148E+00 |
| H | 1.0819375394494244E+01 | 1.7594365324392427E+01 | 8.2941925227028488E+00 |
| H | 1.2148257572631813E+01 | 1.5864594307557191E+01 | 7.8048508715820981E+00 |
| H | 1.2849612396252590E+01 | 1.6489031767490129E+01 | 6.3513249132288507E+00 |
| H | 1.2997092672568712E+01 | 2.0474775312097762E+01 | 7.1125902373066454E+00 |
| H | 1.2553190284361021E+01 | 1.9869949548614763E+01 | 8.7462825542835194E+00 |
| H | 1.4468941431703655E+01 | 1.8574271139194227E+01 | 6.7186274436093560E+00 |
| H | 1.4792357607461506E+01 | 1.8902259151377287E+01 | 8.4297049963999235E+00 |
| O | 5.5710411162637072E+00 | 1.7512681704042290E+01 | 8.5695329093961163E+00 |
| O | 7.0552045105675107E+00 | 1.7058766129165786E+01 | 6.2266682704083056E+00 |
| C | 7.3527517258753692E+00 | 1.8190993700210690E+01 | 7.0969952932574412E+00 |
| C | 5.6528866267427427E+00 | 1.6588509930157223E+01 | 6.3352304429918638E+00 |
| C | 5.3346763727500388E+00 | 1.6350669779692083E+01 | 7.7612398584435347E+00 |
| C | 7.0210585563211847E+00 | 1.7804647856535645E+01 | 8.5546208358037390E+00 |
| H | 4.2295114353038663E+00 | 1.6147863693725871E+01 | 7.9635551309772943E+00 |
| H | 5.8744552821376583E+00 | 1.5462415163903728E+01 | 8.0928978289332907E+00 |
| H | 5.6220063136766267E+00 | 1.5658133716239764E+01 | 8.4291089008601757E+00 |
| H | 4.9759346854007704E+00 | 1.7405747044134106E+01 | 5.8972730373322699E+00 |
| H | 7.1983264759666881E+00 | 1.8567324817843836E+01 | 9.2997836868052293E+00 |
| H | 7.5916970711693184E+00 | 1.6869270739993453E+01 | 8.6744473093573813E+00 |
| H | 6.7371336760608784E+00 | 1.9039964045196815E+01 | 6.7684782729852468E+00 |
| H | 8.4035382673699637E+00 | 1.8418405494412589E+01 | 6.9330213272612173E+00 |
| O | 2.0689515079301451E+01 | 1.2842790521295347E+01 | 1.3509277789127106E+01 |
| O | 1.9723930056620951E+01 | 1.3601788535517823E+01 | 1.1020820886498758E+01 |
| C | 2.0823477935262904E+01 | 1.2606212175713573E+01 | 1.1181880148669400E+01 |
| C | 1.9596276083106286E+01 | 1.4577824607924128E+01 | 1.2091302025669869E+01 |
| C | 1.9558540062342789E+01 | 1.3795086681609710E+01 | 1.3424208378372187E+01 |
| C | 2.0589968614494634E+01 | 1.1901741733071006E+01 | 1.2501161232734740E+01 |
| H | 1.9606150849244887E+01 | 1.4470810418183085E+01 | 1.4286366579640596E+01 |
| H | 1.8613909165231291E+01 | 1.3207788653299041E+01 | 1.3668222291560099E+01 |
| H | 1.8704411985640512E+01 | 1.5108970624441531E+01 | 1.1900698202437781E+01 |
| H | 2.0337938790454032E+01 | 1.5368599515313562E+01 | 1.2028019651720838E+01 |
| H | 2.1405611003884776E+01 | 1.1188999016636830E+01 | 1.2679096585398542E+01 |
| H | 1.9663583000269316E+01 | 1.1355706658309245E+01 | 1.2552731943245899E+01 |
| H | 2.1744571364046383E+01 | 1.3158509491742818E+01 | 1.1339196890637355E+01 |
| H | 2.0829389681038926E+01 | 1.2001494118123317E+01 | 1.0286626762187129E+01 |
| O | 8.6300187433837952E+00 | 1.5609160672435841E+01 | 1.7316339522493429E+01 |
| O | 7.1887997265727162E+00 | 1.5304385123253835E+01 | 1.9828512375575954E+01 |
| C | 7.3705857148667437E+00 | 1.4191432436682284E+01 | 1.8859244972338978E+01 |
| C | 7.5301736328257203E+00 | 1.6612853570444020E+01 | 1.9284302894589668E+01 |
| C | 8.7614266043278146E+00 | 1.6564370643124217E+01 | 1.8384539541090565E+01 |
| C | 8.5927728167820163E+00 | 1.4339299064441610E+01 | 1.7986397263136059E+01 |
| H | 8.8987782732596106E+00 | 1.7549715385859663E+01 | 1.7892230216730695E+01 |
| H | 9.6355848766736667E+00 | 1.6236894678058974E+01 | 1.8959183233141541E+01 |
| H | 7.6538156769162926E+00 | 1.7229536775987732E+01 | 2.0176931532954885E+01 |
| H | 6.6571152252661747E+00 | 1.7069266722367537E+01 | 1.8740750630349243E+01 |
| H | 8.5226532117027762E+00 | 1.3659518036258392E+01 | 1.7166614021246421E+01 |
| H | 9.6030813058645936E+00 | 1.4167776268258880E+01 | 1.8553519770595678E+01 |
| H | 6.5073942021450639E+00 | 1.4146615869528954E+01 | 1.8184840307543897E+01 |
| H | 7.4051112741955505E+00 | 1.3237858287799304E+01 | 1.9415251617591849E+01 |
| O | 1.0702033037051580E+01 | 5.1307311451717430E+00 | 1.6291331214964167E+01 |
| O | 8.7310620239847410E+00 | 6.7144156800652315E+00 | 1.7767433745774831E+01 |
| C | 8.6818993575520196E+00 | 5.2644927834472188E+00 | 1.7736044641278969E+01 |
| C | 9.4595457589248984E+00 | 7.1664030678010260E+00 | 1.6557828006065296E+01 |
| C | 1.0878150704103295E+01 | 6.5446857027876204E+00 | 1.6526636911991289E+01 |
| C | 1.0062834845137685E+01 | 4.6567414171728396E+00 | 1.7515208334404818E+01 |
| H | 1.1413864792970271E+01 | 6.8120555560733189E+00 | 1.5624993888432710E+01 |
| H | 1.1357196965861931E+01 | 6.8354154252905701E+00 | 1.7479120271772565E+01 |
| H | 9.5177746518611528E+00 | 8.2584480757085217E+00 | 1.6741106287052361E+01 |
| H | 8.9637396384991490E+00 | 6.7996815645002053E+00 | 1.5679125247608928E+01 |
| H | 1.0026070629682774E+01 | 3.5598499204117262E+00 | 1.7363737789179314E+01 |

|            |                         |                         |                        |
|------------|-------------------------|-------------------------|------------------------|
| H          | 1.0652000756095141E+01  | 4.7984393818070297E+00  | 1.8439182893183208E+01 |
| H          | 8.0320377046251874E+00  | 4.9755281447639268E+00  | 1.6889114533645415E+01 |
| H          | 8.1819781399484697E+00  | 4.9386159651207349E+00  | 1.8645182342068733E+01 |
| O          | 1.7789725883746407E+01  | 1.2661430665643225E+01  | 2.2174070832022615E+01 |
| O          | 1.9859101310103288E+01  | 1.0792503721019388E+01  | 2.1345639845123547E+01 |
| C          | 2.0124439977701758E+01  | 1.2012388168395178E+01  | 2.2080740437603680E+01 |
| C          | 1.8699176091897229E+01  | 1.1051806659020558E+01  | 2.0457492580947441E+01 |
| C          | 1.7510398126155977E+01  | 1.1461795665584123E+01  | 2.1378048302170640E+01 |
| C          | 1.8945784026184182E+01  | 1.2452263168424230E+01  | 2.2992839977680287E+01 |
| H          | 1.6622435942125122E+01  | 1.1787932577203124E+01  | 2.0761644273929733E+01 |
| H          | 1.7318456981491536E+01  | 1.0643866068609348E+01  | 2.2130118490065126E+01 |
| H          | 1.8635487719236771E+01  | 1.0110380384866438E+01  | 1.9813556261633416E+01 |
| H          | 1.8981851428427984E+01  | 1.1948382837894226E+01  | 1.9812614420987749E+01 |
| H          | 1.9098644366913838E+01  | 1.3439877708977837E+01  | 2.3458153089965553E+01 |
| H          | 1.8734506029422462E+01  | 1.1675500468745138E+01  | 2.3759361855658000E+01 |
| H          | 2.0391904375321005E+01  | 1.2740220119634337E+01  | 2.1323109129222793E+01 |
| H          | 2.1039856036329084E+01  | 1.1804878615797342E+01  | 2.2661744158382159E+01 |
| O          | 1.8587826587311454E+01  | 1.5293591770238098E+01  | 1.6308165603585380E+01 |
| O          | 1.6940161834314125E+01  | 1.7645617527347945E+01  | 1.6642709514365500E+01 |
| C          | 1.6360218490661392E+01  | 1.6407860465963157E+01  | 1.6293262158126243E+01 |
| C          | 1.8267832698957051E+01  | 1.7715900235919115E+01  | 1.5980853385731372E+01 |
| C          | 1.9202947339678662E+01  | 1.6615416316831482E+01  | 1.6529144072658788E+01 |
| C          | 1.7168369164431816E+01  | 1.5180805868804166E+01  | 1.6799585233474151E+01 |
| H          | 2.0129087702568153E+01  | 1.6649916470571931E+01  | 1.5901009072526811E+01 |
| H          | 1.9465587082748588E+01  | 1.6817988840432207E+01  | 1.7595889013665687E+01 |
| H          | 1.87083311696070240E+01 | 1.8657706988627801E+01  | 1.6390801443579374E+01 |
| H          | 1.8235727034826255E+01  | 1.7758530116787689E+01  | 1.4893916316770698E+01 |
| H          | 1.6790577837013348E+01  | 1.4250408466050041E+01  | 1.6364999390176596E+01 |
| H          | 1.7105728410747062E+01  | 1.5118204430648033E+01  | 1.7901541877392582E+01 |
| H          | 1.6052608168094302E+01  | 1.6417834476884462E+01  | 1.5246234474930811E+01 |
| H          | 1.5410180813258334E+01  | 1.6429505398479357E+01  | 1.6804810396684079E+01 |
| O          | 1.5469626478172417E+01  | 4.2277795016774249E+00  | 1.9439615196278243E+01 |
| O          | 1.3982391733288113E+01  | 2.0636048101212090E+00  | 2.0608282670487881E+01 |
| C          | 1.5350347619954698E+01  | 1.9558163996354871E+00  | 2.0032815329318055E+01 |
| C          | 1.3257965691903999E+01  | 3.1485525125522398E+00  | 2.0020908476249215E+01 |
| C          | 1.4124178063297871E+01  | 4.4388564397315990E+00  | 2.0009329153758102E+01 |
| C          | 1.6096911774924997E+01  | 3.1959078393593741E+00  | 2.0315836349466398E+01 |
| H          | 1.3713075742867684E+01  | 5.3039170807465084E+00  | 1.9452621984010733E+01 |
| H          | 1.4222188515618939E+01  | 4.7008836699113177E+00  | 2.1064484719050540E+01 |
| H          | 1.2446322464486341E+01  | 3.4115845043061013E+00  | 2.0731317643385257E+01 |
| H          | 1.2827323925372452E+01  | 2.8543036023986579E+00  | 1.9022494126304437E+01 |
| H          | 1.7174718969093714E+01  | 3.2706374123077051E+00  | 2.0009123914266610E+01 |
| H          | 1.5994433311284263E+01  | 3.3913160445900807E+00  | 2.1403095701536976E+01 |
| H          | 1.5288161009002547E+01  | 1.6692062748516030E+00  | 1.8993907260870607E+01 |
| H          | 1.5796518644818759E+01  | 1.0246142283601705E+00  | 2.0460740647175733E+01 |
| O          | 1.3766510096428158E+01  | 1.1124091817292454E+01  | 4.5803183283411277E+00 |
| O          | 1.2319252653962481E+01  | 1.2885879796977388E+01  | 6.3516237831793880E+00 |
| C          | 1.3772030520439094E+01  | 1.2942375540735050E+01  | 6.1185052451578734E+00 |
| C          | 1.1958689101285881E+01  | 1.146517281444712E+01   | 6.1802275604410433E+00 |
| C          | 1.2400681534780380E+01  | 1.0989986676514865E+01  | 4.7742199387150626E+00 |
| C          | 1.4136617917962605E+01  | 1.2524581950767635E+01  | 4.7194759864366196E+00 |
| H          | 1.2104148057499431E+01  | 9.9558449724722191E+00  | 4.5136334350342766E+00 |
| H          | 1.1945360398627297E+01  | 1.1652801235501927E+01  | 4.0988332099225611E+00 |
| H          | 1.0856842405223173E+01  | 1.1312099735000995E+01  | 6.2743937389784241E+00 |
| H          | 1.2357084014186738E+01  | 1.0778719188341006E+01  | 6.9867550207360853E+00 |
| H          | 1.5206953780308822E+01  | 1.2581271109508270E+01  | 4.5453253622942702E+00 |
| H          | 1.3583620803319370E+01  | 1.3129702298187423E+01  | 3.9676587433360995E+00 |
| H          | 1.4297217046852229E+01  | 1.2320562150725133E+01  | 6.8692253512486889E+00 |
| H          | 1.4100536077353748E+01  | 1.3986048860335126E+01  | 6.2858501219981253E+00 |
| O          | 6.8164224705140546E+00  | 1.0252833993111306E+01  | 7.5807440703261459E+00 |
| O          | 6.7380839730114737E+00  | 7.4877115605774964E+00  | 7.9057580345040401E+00 |
| C          | 7.7502642944567297E+00  | 8.2984331064933929E+00  | 8.5139055394925371E+00 |
| C          | 5.9812778691812909E+00  | 8.1720917532991617E+00  | 6.9014658459047791E+00 |
| C          | 5.6228895538253933E+00  | 9.6414924047812942E+00  | 7.2689409338433233E+00 |
| C          | 7.4356692945100313E+00  | 9.7171594638754701E+00  | 8.7534270615549090E+00 |
| H          | 5.2676299394031494E+00  | 1.0125670755254649E+00  | 6.3221881024049429E+00 |
| H          | 4.855508757676691E+00   | 9.7432948627148548E+00  | 8.0223845575865926E+00 |
| H          | 5.0197219801907158E+00  | 7.6760650669415709E+00  | 6.7855083049635683E+00 |
| H          | 6.4791944349402986E+00  | 8.1393622179647860E+00  | 5.911338960226549E+00  |
| H          | 8.4193147549686937E+00  | 1.0277321475070723E+01  | 8.9433061929264870E+00 |
| &END COORD |                         |                         |                        |
| &VELOCITY  |                         |                         |                        |
|            | 7.6271358603428828E-05  | 1.2696890829272165E-05  | 8.5894081136822400E-05 |
|            | 8.9028945441101562E-05  | -2.9921414200482160E-04 | 3.6349479106561754E-04 |

-7.7856878862950726E-05  
1.3555425715593090E-04  
1.4391362883863596E-04  
-9.2162741256406844E-05  
-4.5514617976809168E-05  
1.9095173323811296E-05  
-1.0664807151036740E-04  
7.7373626840376900E-06  
-1.4767178571380028E-05  
-3.5294801494415660E-04  
4.6809846246915958E-05  
1.7706721418910075E-04  
-3.1709722918500335E-04  
2.4619778017412320E-04  
3.4823323638593235E-04  
-1.1408886119929063E-04  
2.0790882319202759E-05  
-2.8372824877483929E-04  
-2.1374539784288390E-04  
-1.1560677450213323E-04  
-4.1338277829136366E-04  
-2.5238870979504342E-04  
4.7430134363464613E-04  
3.7298676173919727E-05  
-1.0352744447325842E-03  
2.0790882319202759E-05  
-2.9029215914506458E-04  
8.8190312029348943E-04  
-7.9887096183037308E-04  
-4.8869439068459039E-04  
-3.0415137565745405E-04  
-8.1875608613907766E-04  
1.3615414482633618E-04  
1.8937468779620429E-04  
-7.4873418200674662E-04  
1.1486056827289293E-04  
-6.0874101991927108E-04  
1.9351034567964259E-05  
1.0525781782321594E-04  
-2.5643194514592593E-04  
-2.5540697199629320E-04  
-2.3450680651844737E-04  
-1.7063422130646032E-04  
-8.4785798055731995E-04  
-2.3458502181475727E-04  
4.5567906459862057E-04  
2.0060913636307879E-04  
4.0459244362238850E-04  
6.8548157131704033E-05  
1.9339902689123850E-04  
-3.1967534566233937E-05  
-2.3050667596499140E-04  
7.1611122894176148E-05  
9.0273400868513671E-05  
1.7818294854404906E-04  
-8.2135611247869051E-04  
-4.9023138146347424E-05  
-7.4021240083446940E-05  
7.4078795876351576E-04  
-2.9040326779227523E-04  
7.4767250299202193E-05  
7.9085218129174256E-04  
1.9806292385137728E-04  
-4.1183380217092892E-04  
-2.6438155472181048E-04  
-2.7486849158466116E-04  
-2.9784418106693273E-04  
2.6845562487489486E-05  
6.9929532596196538E-04  
-2.9923098308133058E-04  
2.2526757948659136E-04  
4.8114870898056003E-05  
2.5545110992009594E-04  
-2.0210849514698970E-04  
-3.1725436965475189E-05  
1.7906753827364691E-04  
-4.0331775301900985E-05  
-1.1830729441468004E-04  
8.6541105684817787E-05  
-4.3341245712783871E-05  
-1.0893826053447184E-04  
4.3988441641501643E-04  
2.4824421599437083E-04  
1.1710396987546864E-04  
-1.2073628221637390E-04  
-3.4934160750624521E-04  
3.6914275560910256E-04  
-8.9556246876860176E-05  
1.2531549088967144E-04  
7.043669805505533E-05  
1.8415245465896882E-05  
1.3434567795485021E-04  
6.6751934874441260E-05  
2.0035784180843647E-03  
-1.4242479855559390E-03  
4.7600571663980121E-04  
-5.0736068466650859E-04  
7.3044683378270655E-04  
2.0425037069414794E-04  
1.2354851874542435E-03  
-5.6937457041729173E-04  
-1.5847982864418213E-04  
7.8252449212619824E-04  
-1.6841984082536215E-03  
1.7144960344705479E-05  
-5.3677752279264620E-04  
-1.0871087677689151E-03  
-2.4165532557115889E-04  
-9.1225993329513053E-04  
3.8127956124496846E-04  
-3.3312948243388336E-04  
2.5148874803648927E-04  
2.4840338952126205E-04  
2.5398958665245908E-05  
-1.7056653493193011E-04  
8.1431225308661068E-04  
-7.9768821217727012E-05  
-6.0228598622306918E-04  
-2.6974702587705953E-04  
-4.3911602101396100E-04  
9.3205830200582089E-04  
6.2538561253576549E-04  
-4.8407287083260877E-05  
-1.2176453859483883E-04  
6.3630703056360895E-04  
-2.7498662081341523E-04  
-3.3786885157291755E-04  
-1.2975911081251185E-04  
2.1471750396189360E-04  
3.0365245871122922E-04  
4.6463667943014706E-05  
6.6301264347449842E-05  
5.8384107654440697E-04  
1.3153102355099584E-03  
-9.1337536537370570E-04  
6.3741986797252856E-04  
1.2841165897395763E-03  
-1.9569009846077037E-03  
2.6319554569115901E-04  
-1.2232104965679088E-04  
-1.1067317634951238E-03  
-2.6637344478791872E-05  
-7.9729519321597615E-05  
-3.1232417237056433E-04  
-9.5810969676618927E-05  
2.6460788153915248E-04  
-2.9504916460176383E-04  
-4.8958270535337002E-04  
3.8097255104957813E-04  
-2.5902418384824566E-04  
1.9823888631750409E-04  
-2.1914339880030337E-04  
8.4238481811746413E-05  
2.0062866793484876E-04  
1.0366292865790929E-04  
-3.3784227087773190E-04  
8.1913331692734422E-05  
1.9129306087448239E-04  
-1.6997722263248928E-05  
1.4173450088500049E-04  
3.1251298800473523E-05  
-1.1861771060489951E-06  
-1.7522582500079949E-04  
9.6895578545141170E-05  
-8.6261799399837998E-05  
-2.5659371878283198E-04  
-1.2251768987552240E-04  
6.1282603610990838E-04  
-9.9935432802047953E-04  
1.8709730059808340E-04  
-2.2165570198590768E-04  
4.8795021764220094E-04  
5.6080612454873792E-04  
4.8566565681922589E-04  
-3.5281051850874847E-04  
-3.6732383900514630E-04  
3.3336577040078870E-04  
-1.1987821275492929E-04  
2.6111644950152870E-04  
4.8387581260432675E-04  
5.4967706973290114E-04  
-1.5548867887526822E-04  
-8.5870484618601423E-05  
9.2218003260284272E-04  
7.5468269286161141E-04  
-1.9801214975312314E-04  
-1.4097191895207523E-04  
1.2164124923490315E-04  
1.3107149184805619E-06  
-2.6120196491682366E-04  
2.7045607756282418E-06  
3.7622050833750905E-04  
-5.1955398692383361E-05  
5.5172112568934372E-04  
3.0155761539236658E-05  
-3.9006386433627400E-04  
7.4553645021023399E-05  
-8.9124904733284868E-05  
-1.6948528264916808E-04  
2.1438954546187749E-04  
-3.1722728825061018E-05  
-1.0376836977538323E-04  
-9.9403428676358066E-05  
-1.4460635548027798E-04  
7.2459962108784845E-05  
-1.7360891158112938E-04  
5.4164796917937599E-04  
5.5872267027411924E-05  
-1.3933528803405229E-04  
-1.3015232579780447E-03  
-2.1578244945898170E-04  
-2.0899207561984409E-04  
5.7315316394098769E-05  
1.5114719784163424E-03  
-3.2002361209883273E-04  
5.6875077723761414E-05  
6.6789193616376271E-04  
1.1083424402902069E-04  
2.5050889299753582E-04  
-1.1714954220795593E-04  
-4.0775542050354128E-05  
-4.1197197464902443E-04



-3.0697798496098950E-04 -6.2652888136119643E-05 6.9055056158833005E-04  
-4.8078283897862781E-05 2.2132865646140221E-04 -5.3105590889826246E-05  
2.0386200228143212E-04 9.2915767006684864E-05 1.7646158749217008E-04  
4.7521245665326773E-05 1.1060787080616667E-04 1.0854605887092531E-04  
5.1976251376733369E-04 -8.6485133294992710E-04 3.3382156070986915E-04  
-8.2075345212312076E-04 1.3515293772144881E-04 5.7578887471261833E-05  
5.6106064979330689E-04 3.6678694349089849E-04 3.5848750764679347E-05  
-7.3244911729756351E-04 1.3715311458959012E-04 1.0379774523359233E-03  
4.2974916873229300E-04 1.8873986058135360E-04 1.2874320463007764E-03  
1.0397718610700179E-03 4.7939171775825178E-04 -2.4082055411217613E-04  
-3.3714651680273052E-04 -1.1439682342009871E-03 9.5289876730152547E-04  
2.0181715460456952E-03 -6.5303604288281667E-05 6.4404976144167528E-04  
3.8187166973407450E-04 -5.2466856798520872E-04 2.8149696106031982E-04  
9.5297137419018572E-04 7.2131209018201962E-04 -3.3227202133372254E-04  
-3.8931952931865900E-05 -7.5352050077979665E-05 5.3749973118723958E-05  
1.5727178869976002E-04 1.2703341683130171E-04 -2.0077792969915378E-04  
-1.0386076236278858E-04 -3.0401192783085720E-04 2.2043675635653392E-04  
1.2641143296211066E-04 2.6696424837325367E-04 1.8434990183049219E-05  
9.1447567002415905E-05 1.0834795035083944E-04 -1.9152532970434608E-04  
6.5690092890326198E-05 7.1339298609462924E-05 3.9121561457143128E-04  
1.8395371562581381E-04 2.3078453015757907E-04 -1.0299537623192222E-03  
3.8120462929359461E-04 -5.7190032886360114E-04 -5.1278648266120082E-04  
4.4773551041912614E-05 -9.0752978236796557E-04 -1.1319152247399867E-04  
3.6817546909013760E-04 -6.4291981809331178E-04 -1.2236903566471165E-03  
3.1769781113526435E-04 -2.0727998189342764E-04 -2.3348354679429876E-04  
4.7424569274951984E-04 4.0303241182128920E-04 -5.5886561868286012E-04  
-6.6329301665030767E-04 -1.5298954910931476E-04 1.6733979615176473E-04  
-3.2083338460226569E-04 -2.9457466221840422E-04 -4.2499588411488336E-04  
2.2203889208222889E-04 1.1588276287047211E-04 1.8940175016108596E-04  
1.8394562817679326E-04 6.3345248481025812E-06 -1.3763660688160024E-04  
1.7340694210270732E-04 -7.1948667036562266E-05 5.5352256816141359E-05  
-1.8386670364066844E-04 1.4322671137480642E-05 1.6710884764630551E-04  
-3.7710530345479290E-04 -1.0284553441444132E-04 -1.3177904385468155E-04  
-1.4263281804881658E-04 -2.3924534210859204E-04 -6.1904804154248923E-05  
2.6784431689710165E-04 3.9885928140726427E-05 2.2213177973021408E-04  
-2.3362930253912595E-04 -4.0229024947353322E-04 4.1514105504355197E-04  
8.0501401275602752E-04 2.2050003773891553E-04 1.4348602243965359E-03  
9.9069271482540877E-04 -1.0260447759273554E-03 4.7735356433922137E-04  
6.170112728576930E-04 2.2287942252595332E-04 1.1668284273781530E-03  
-1.6707508793456466E-03 1.1003229683764805E-03 7.0567617428265279E-04  
8.2985698407885729E-05 -2.8219666217714295E-04 -6.6879441455616946E-04  
-7.1692634750701069E-04 8.3330869887391289E-04 -1.2086404313109364E-03  
-7.8625523909279648E-05 -5.2781038414990578E-05 -2.0060631195638506E-05  
2.6928179720199150E-04 -6.9998497950487677E-05 2.1672432900754878E-04  
1.6345650516427451E-04 8.2822824958796195E-05 1.5049752199389253E-04  
-7.0775265381176980E-05 8.3559317982397104E-05 -2.8441419336447073E-04  
1.8340670727746812E-05 -1.8484224681228388E-04 -1.8777111669147903E-04  
1.2267818986691950E-04 5.8999067098894876E-05 6.3981741761622046E-04  
3.8916283080860981E-04 3.7544611824694531E-04 3.5502651134549431E-04  
1.2878345731916134E-04 -3.2985625310455870E-04 -1.0251887580810702E-03  
1.2151780905108848E-04 9.6291722754244301E-05 1.1042193676163679E-03  
5.9504760889985905E-04 -1.0004722472893566E-03 4.8242292250156595E-04  
2.0606229727109112E-03 7.5642733843234221E-04 -6.6969352909880195E-04  
-1.4063275911504900E-04 1.2211692330543983E-03 1.4623146379881919E-03  
-2.3907910781895811E-04 -3.1355190576493748E-05 1.7389020501500123E-03  
-3.1761084102318205E-04 3.1547526579121419E-04 9.2830916425071304E-05  
2.6565461984165540E-05 -2.5011166640730934E-04 -2.2133149373939118E-04  
8.4052877223781991E-05 3.2862328867831319E-04 2.6006036976810725E-04  
2.5176979259697958E-04 2.7912976264429958E-04 -4.8920776322784634E-04  
-3.7901820543775536E-04 -1.1160726752539577E-04 9.2072852416801623E-05  
-4.9128254598296436E-04 8.0952104641330845E-05 -2.9079356446073609E-05  
-1.7189909272329789E-04 -1.0207228369312524E-05 -3.7251920105337943E-04  
5.7576321359168828E-05 6.7633713381722103E-04 1.5426684005863066E-03  
-1.3254013322923808E-03 -1.0442548640842396E-03 3.2536895896004153E-05  
4.7305217907060016E-04 9.8763214927074204E-04 -1.4599313270839418E-03  
1.7098991817100784E-05 3.6326075253094946E-04 4.2463670579998128E-04  
3.5905168386131159E-04 3.1190570875297549E-04 -2.5448914109400036E-04  
5.1780608739805201E-04 -5.3891833979643783E-04 -1.1629680504974212E-03  
4.7624137637729188E-04 9.8494081605810164E-04 1.0046150803423589E-04  
6.2053051811021824E-04 -1.7544656502591438E-04 -4.8970607739708702E-04  
-2.2610652963918712E-05 2.2096654341966739E-05 1.3445845181358582E-04  
-1.4433093303692013E-04 2.2046535922550187E-04 9.8243676279408011E-06  
4.3589739008556334E-05 1.2720560711876406E-04 -2.9152740251343338E-05  
-2.3498883558367210E-04 2.2598032781988577E-04 2.2561332607006220E-04

-8.3708512543942664E-05  
-4.4037918678633619E-05  
-1.9021664649099035E-04  
1.5503926566348568E-03  
-2.6179143387920236E-04  
-4.2458695134101011E-04  
-1.9957970074893755E-04  
-5.1069927607237534E-04  
4.2320269548310998E-04  
6.8592353985041758E-04  
-6.4353537628397393E-05  
-3.6468861683719065E-04  
-1.2682117160245780E-04  
7.3075657602917501E-05  
-3.5019176823715485E-04  
-3.6857528654022715E-04  
7.4439651749684912E-05  
-5.8061159547327917E-04  
8.2327330399035070E-04  
-1.5573986748499836E-03  
2.3567376530989219E-04  
-6.6130347209608197E-04  
-4.3970306670434512E-04  
1.0793113462901104E-03  
-1.7556504891949056E-05  
-6.8699466591472003E-05  
7.3737851999945342E-06  
-1.6211602804350523E-04  
-1.3019074829096353E-04  
3.5814156240014726E-04  
1.0614600602449299E-03  
-1.9355685482160939E-05  
-1.2954063622178655E-03  
-1.1431956266679344E-03  
5.5497591122939238E-04  
-4.6285248152857101E-04  
-4.7754540045074180E-04  
-4.5425859159035421E-04  
8.5129482944784862E-05  
-2.7334316161774935E-04  
8.2330736261272672E-05  
9.5731350150825115E-06  
-1.0911800711264090E-04  
-1.7555072224273031E-05  
2.9544556482137880E-05  
-7.4540320811952786E-04  
-4.3793400750801554E-04  
-1.0826765258209986E-03  
-7.3903484278749630E-05  
-4.6994632575224305E-04  
4.4456810622628293E-04  
6.9077196259474845E-04  
2.5209932675727839E-04  
-7.3861605884175245E-05  
-1.3929652000595782E-04  
4.3256444615299901E-04  
2.5257375559045324E-04  
1.2349197290317362E-04  
-4.3426264018896535E-04  
-7.7001523280752953E-04  
4.4670407961488123E-04  
-1.6146598815896035E-03  
3.3392231175447191E-04  
-1.3924173239899704E-03  
1.0476032867954789E-03  
1.4023065753169877E-04  
1.6402983942775961E-04  
5.3953794057906427E-05  
-2.6956063187962123E-04  
5.4082081689034960E-05  
8.1059612014415557E-05  
-6.0356472591729513E-05  
-1.8055507396694175E-04  
3.7261659946328976E-04  
-1.4509676895734769E-04  
3.8704215556662673E-04  
-7.3877145774042547E-04  
-1.3163389586885084E-03  
4.0169181834662053E-04  
6.8187875153988373E-04  
-4.0240324628431468E-04  
1.7824462145982149E-04  
-2.5767985292978444E-04  
-5.3248065756508940E-04  
-2.9359585998585720E-05  
-1.3846351117099951E-04  
3.5756974027580817E-04  
2.5177049217096030E-04  
-8.4507189507965915E-05  
-2.3657993765680338E-04  
-3.3832891053056597E-04  
8.2031754026086283E-04  
-7.0045388679429400E-04  
7.2343903039419745E-04  
1.7048067679424582E-04  
1.0898409256037249E-03  
4.1994211100875527E-04  
5.3335714976492749E-04  
-1.7550026829535998E-04  
3.1898383630993136E-04  
-4.5689493530399703E-05  
-1.5898269514524579E-04  
-5.2582247350184310E-04  
7.7119301974381676E-05  
-8.2686583913164100E-04  
-1.2404921150779454E-03  
-1.3351378943443682E-03  
-2.8086979248782970E-04  
-7.6480003719179031E-05  
-5.3215002001082265E-04  
5.0121168284891456E-04  
7.0844298216830219E-04  
-1.0662643847560295E-04  
-5.3774554128774747E-06  
-1.7967677984955500E-04  
-2.3186425332117678E-04  
-8.4354958888768852E-06  
3.1372922357360828E-05  
-2.3666910710832937E-04  
-7.3419952254074705E-04  
4.6320570082951400E-04  
-1.0500158586851529E-04  
2.9606708416867410E-04  
-3.5527699921215618E-04  
-1.8427663476209839E-04  
-2.7607144246681305E-04  
-1.2306677283923557E-05  
-1.1943305833684379E-04  
-1.0468546088738920E-04  
-1.2973449405587149E-04  
1.8821918341334619E-04  
2.4210230032506661E-04  
2.9465426732586667E-04  
3.8829368921487073E-04  
-1.0337773968062997E-03  
2.6637844286224587E-06  
-5.8530394540131994E-05  
-8.5219641247239714E-05  
2.6043033907768837E-04  
1.0172063818455685E-03  
5.1552129577810481E-05  
-9.1965319063677000E-05  
8.5265261443791036E-06  
-1.9494266395972629E-04  
1.4444928796996897E-04  
-5.9390246975489517E-05  
-1.0727019237924710E-03  
-7.0554317090754212E-04  
-3.1282226443873272E-04  
3.4616212342790339E-05  
9.2030758441775679E-04  
-9.7333184884236770E-05  
3.9770121774328076E-05  
2.9856161037800772E-04  
5.5931977356330724E-05  
9.3686836102453079E-04  
7.3292903303968449E-04  
-5.7981092597743269E-04  
1.8006552417243051E-04  
1.2499395356239948E-04  
7.8656325692196317E-05  
-7.6224173895282797E-05  
-3.7929942294785728E-04  
-1.7525021708904816E-04  
-6.1372051769603773E-04  
-8.8808115207403933E-04  
5.7136665020458876E-04  
2.0156779446335415E-05  
-8.1522903515003186E-04  
2.1632371314020258E-04  
-1.5232360603149478E-03  
8.1384455185247039E-04  
-1.4741290533099648E-04  
-1.3120688145015145E-04  
1.6821005172245067E-04  
-5.5550215256327257E-05  
2.3170074662751721E-04  
-1.5526959168646283E-04  
-2.2429283619759485E-04  
-1.9171790885889765E-05  
3.2434806641730727E-04  
-1.2017300692890193E-04  
-3.5982709318295030E-04  
-2.5733589258958002E-04  
-1.0991083400244330E-03  
-1.3738394293918903E-04  
4.5821222259109632E-04  
-7.5193415114265265E-05  
1.1488627635616760E-04  
-4.0705481456051145E-04  
4.2575023604282481E-05  
-1.3611027029185909E-04  
-2.5308039111738943E-04  
1.4507415618481950E-04  
6.0549225751847238E-04  
1.3244790155881676E-03  
1.1095721859151308E-03  
8.3973396332835627E-04  
1.9189100251350945E-03  
4.2046958737661591E-04  
1.3145811962665584E-04  
3.1176217037269105E-05  
-1.9379378918047747E-04  
-1.9429197014774797E-04  
-3.0900342062544243E-04  
-9.2307776715018524E-05  
-9.2680302153954936E-04  
-3.8419379224952140E-05  
-7.4644240119395191E-04  
5.1041246706780481E-04  
-1.2596737495567222E-03  
3.3746667490349846E-04  
-7.3106495555639412E-04  
1.1144696285686848E-03  
2.9426804541698930E-05  
-1.0232372379703800E-05  
1.2749143069740637E-04  
-1.9991247407470932E-04  
3.7261757549785169E-04  
-2.3270926393349756E-04  
8.7078779049405675E-04  
6.4326573152427422E-05

-6.9652699499960955E-04 -6.4253368984897106E-04 7.0099733521714286E-04  
-5.2943358941895152E-05 -8.1868521368218478E-04 6.1416541835991937E-04  
-6.6167447764018490E-04 1.0992856093620525E-03 1.0386604963973708E-03  
1.8233564806743139E-03 -2.3784364706712873E-05 -4.5472891492010046E-04  
1.0297783402667198E-03 -8.0585636150565753E-04 -3.3745099532722579E-04  
-1.9297674945421050E-04 3.2720098637004140E-04 5.3807701247500213E-04  
-1.8637500426920179E-04 2.1259388599934693E-04 1.2302861703715733E-04  
1.2230373790053032E-04 -1.6547852588734516E-04 -1.4226009061968866E-04  
-5.7271638706914731E-05 1.5486670257350288E-04 -2.4754020300398865E-04  
-7.5422786529350002E-05 2.4575868050864195E-04 2.1532951461162683E-04  
2.0529432993088452E-04 1.4042587635246305E-04 1.3340384460905772E-04  
3.2330810189148555E-05 2.6491544015274111E-05 1.3005376321214895E-04  
1.1551069965789476E-05 1.6633666125672787E-04 1.5147661124151545E-03  
-2.8597631746363965E-04 7.3354040228624688E-05 3.5512304370227909E-05  
7.1253461050583015E-04 -6.0116031504291179E-04 -1.6543722083059361E-04  
-8.2301148965488056E-04 -1.3481366301930950E-03 3.3244947532055246E-04  
2.6021066192651467E-04 -2.0062275253199800E-04 8.4838980048085311E-04  
-6.5931664383752785E-04 -1.1799498592115292E-03 -4.8317080839021398E-04  
1.2363879215025438E-03 1.1116211878205232E-03 -1.8391713030012832E-04  
3.8924735785266255E-04 -2.4959417780273972E-04 -1.1299026536600054E-03  
-2.0430554377824504E-04 -1.2514470111397622E-04 2.9987923863725418E-04  
-1.6639536417471269E-04 -1.3994865579061331E-04 4.1133733619259905E-05  
2.9949952237855719E-04 2.8690075835883399E-04 2.1449938337347551E-04  
1.1345434481699196E-04 9.2556686750058692E-06 -2.3861681930836774E-04  
1.1849057145669235E-05 2.1024420366677377E-04 6.8888046853976260E-06  
4.8195916376581545E-05 1.1881073252620927E-04 -2.2139206123218599E-04  
7.2020694945528656E-04 -1.0528694104992235E-03 2.3646149311525009E-04  
-8.4985163637282812E-04 -1.6325414345323247E-05 1.1076242030034497E-03  
2.9824127421109321E-04 -3.8562530293740867E-04 1.1130620049612219E-03  
4.9842208737325446E-04 -1.4549881670408650E-04 1.6402742005643936E-04  
3.2613419027923594E-05 -5.0456383813192247E-05 -5.2256532642523081E-05  
-4.9598446341330663E-04 -7.6998735434736360E-04 -8.2644077579607333E-04  
3.9272220945751908E-05 2.8775332223168331E-04 -1.8041891334693059E-04  
-2.1786043024192881E-04 -1.0180718068854837E-03 -7.5874384464544873E-04  
-3.2635143849778377E-04 -1.9021808925360266E-04 -9.4255779624569477E-05  
-1.2268470263307094E-04 5.1499374543968549E-05 -1.0932506973943607E-04  
-3.4233702411757188E-04 3.5207490798874974E-04 4.4264275033654564E-05  
-5.2519848964047204E-05 -1.3348098153030715E-04 -1.0903258307591006E-04  
2.9116904447753579E-05 -1.1553264673378815E-04 8.7631682764578302E-05  
-1.3937371510196395E-04 -2.5269854368680927E-05 -1.3078020138470814E-04  
-7.1580570862659200E-04 2.2372785485567730E-04 -1.6914437488198139E-04  
1.3563609061377241E-04 6.0134328490142879E-04 -4.7440618472679909E-04  
8.9278774905547338E-04 -6.7226918748832919E-04 1.3671829987835968E-03  
-2.1648225379886903E-04 -9.4179553792987343E-04 -2.1058222377326198E-04  
2.2216316233072131E-04 -1.8964917609368183E-04 -6.1104088132319539E-04  
-7.7596457301481615E-05 8.9970627275452644E-05 -4.0198633236272503E-04  
1.3688214954496545E-03 -1.0335099494098753E-03 1.7175140928144791E-04  
8.2790239129761588E-04 -7.4050873245912045E-04 -5.9554372568810783E-04  
-2.6784594866781028E-04 -7.8098878116281711E-05 1.0086871900048935E-04  
-4.8161919938434730E-05 1.6742918890273926E-04 1.1675995488741126E-04  
4.4178690566430934E-04 -1.9816605287434290E-04 -3.8495103675588427E-04  
2.9844843493674307E-04 1.6029298138644545E-04 -1.2983549976934085E-05  
1.0944200450686761E-05 -4.7694422533722408E-05 -3.5993618610860630E-06  
1.7974017356686879E-04 3.9257668461027700E-04 -2.1257272612474080E-04  
-7.6350929032905984E-04 1.0952903227716788E-03 6.1491931041166741E-04  
-3.2530967252955968E-04 5.3994003242225795E-04 5.2544424033934708E-04  
-5.8825004197724038E-04 1.4666646827651453E-03 -4.8068492711901448E-04  
-9.3905141700527980E-04 -2.7235520936088605E-04 5.4645899647224380E-04  
9.4800602855266201E-04 7.0589586280273519E-04 -8.7181418018144035E-04  
-1.1373665499546527E-03 -6.9491586788714024E-04 2.6040604769598136E-04  
-4.0652048674496714E-04 -1.2415684264975629E-03 -1.3915305883944112E-04  
-4.0845035836899364E-04 -1.4881593373381634E-03 -6.2009569958605898E-04  
9.1963211327674720E-05 -1.7381049951979588E-04 5.9307615469701930E-05  
-5.7638131206514985E-05 -1.1240163484041755E-04 -2.2326957536281537E-04  
2.0159417837746249E-05 6.5561623760093196E-05 -1.5317687095274646E-04  
-1.4226477032045905E-04 1.6467514046904981E-04 -2.6018403247589822E-04  
-8.4624723264027101E-05 -1.6884281027580608E-04 4.3525208212375049E-05  
-1.5379037187604409E-04 -4.1359060007379248E-05 -1.4961689696632442E-04  
-7.9531034235129513E-04 -1.1729599350151778E-03 -9.9095308523749755E-04  
-1.2455040248739250E-04 -4.6978116448778425E-05 8.1573039580800754E-05  
-2.7088887207133149E-04 2.6636862417547781E-04 -8.5069063606320089E-05  
-4.5715082444994194E-04 2.8549503896795135E-04 -1.1573381869998687E-03  
-2.2069171225295392E-06 6.4526693496630807E-04 -6.8397300713585451E-05  
-2.3000613892632774E-04 -3.5282100232643550E-04 1.5678159747841785E-03

-1.4381709178393209E-03 9.7236353077143534E-05 -1.9693545662426487E-04  
-9.2398392724109870E-05 -7.4154805949094919E-05 -1.0262117655245905E-04  
5.9056316467298552E-05 2.3019379151187165E-04 1.7921060183689029E-04  
-6.4391008942595159E-05 -2.9612963076115664E-04 6.2320846268037702E-05  
3.2642949540351388E-04 -2.9824492979816194E-04 2.2678755277920110E-04  
-6.7519755649969154E-05 -4.1781591111763797E-04 6.8158930909980835E-05  
2.0404514245143162E-04 1.6890826713683092E-04 -1.5298278173473282E-04  
3.2223017629542423E-04 4.1429193116606641E-04 3.6202008601201804E-04  
-4.0184959253421106E-04 3.4441143905904089E-04 -7.5322430518364890E-04  
1.9332312011621981E-04 3.2199485295448979E-04 -7.3580366352917132E-04  
-9.5708286443843104E-04 4.3487543418861143E-04 -1.9596327386783977E-03  
-6.2946244015142880E-05 -5.1779227907530084E-04 -3.6563442898223525E-04  
-1.5524250943790594E-04 -1.3629572198979201E-03 -2.2689087610638375E-04  
1.3006293509209741E-04 2.0670505213417603E-04 -2.7416923931782353E-04  
-5.8554484105203965E-05 -2.9328999943869778E-04 4.4621826577799967E-04  
-7.0801592645970441E-04 -3.5291248772653807E-04 1.1721205921988446E-04  
-1.1580291739784862E-04 7.2163544891600163E-05 -1.2484054006729967E-04  
9.7946402981368951E-05 8.2830227385088058E-05 2.0931772209699574E-04  
3.1299685783681087E-04 -3.0371400556998627E-04 -1.0069574309932113E-04  
-7.1256457980842835E-05 1.5055064909790360E-04 -6.0921621452844333E-05  
4.3113173283244508E-04 2.7077436584947348E-04 3.4777231714188468E-05  
2.2514992270220296E-04 3.5736808288880697E-05 4.6919909598061757E-05  
3.8734858064015827E-04 -1.5658761555866073E-05 -5.2289568754765607E-04  
4.9395359864739575E-04 -3.9828042125858323E-04 3.8432209337419280E-04  
-1.6941932635660179E-04 -3.5149045872318410E-04 -1.6769982812261795E-04  
3.5496548045063284E-04 2.2020782666464139E-05 -6.4880541662987363E-04  
1.0567159001037339E-03 -7.6738224545877239E-04 -5.8437629785721822E-04  
6.3077809149042084E-04 3.8363822025699201E-04 1.2178561319176624E-03  
-6.8009543159678275E-04 -2.1168189148210096E-05 8.7740839583100481E-05  
9.9287426659633912E-04 -1.0514864978381770E-04 -7.4756561833400933E-06  
2.2520516007275192E-05 -1.4083254879562377E-04 -2.0625584063602704E-04  
4.9956003581691524E-05 -2.6240828587469739E-04 -8.4269585614424089E-05  
8.6978530669203343E-05 -2.9438967341542997E-05 3.8976030651037091E-04  
9.7094751477342968E-06 -7.8012307887653250E-05 -1.0778071330378941E-04  
1.8901199765688237E-04 -1.2129478619059473E-04 6.0614596126019552E-05  
4.4005852561300040E-04 -3.0883015797931006E-05 -1.8611414231115792E-04  
4.6447285960772984E-04 2.5650662246622202E-05 4.0801189856604618E-04  
3.9660310932424051E-04 1.7356042036008817E-04 3.9267005037207404E-04  
-1.8953493058728089E-04 -6.3427586420579396E-04 5.6492122277531731E-04  
5.2472954051929440E-04 -2.9504455700365588E-04 -4.2776890722839530E-04  
-1.5834982968970584E-04 1.7893792302873461E-04 1.3896935975239025E-04  
9.7418788145993383E-05 -9.2420173286063398E-04 -1.0988226861980713E-05  
4.3210122497949960E-04 6.3188599022930589E-04 4.9269920151499705E-04  
-3.1777640533011027E-04 -1.6526448587881411E-04 -5.7639798692657375E-04  
3.7422317944616207E-05 5.9982130312745670E-05 8.5692843991171214E-05  
-2.2269315682702328E-04 5.1611607609368375E-05 3.1491478768194838E-04  
-5.7532986203674740E-04 3.1309820940542489E-05 -2.3598032368913349E-04  
-1.0067481604502386E-04 2.3801831924032224E-04 1.3657870976388405E-04  
-5.8553495418264938E-06 2.0145483716667051E-04 9.6820598425706610E-05  
-4.9900886392707336E-06 1.7874797461248405E-04 3.5900383304248476E-04  
-4.6028636053676722E-05 2.8308255202896473E-04 -1.0817429381980990E-03  
-5.9035174952780974E-04 2.3106871063753838E-03 8.5132049036194845E-04  
3.0536178199776492E-04 -6.1470752990481158E-04 8.7406022723852787E-04  
7.5221686052203145E-04 7.6664918377793265E-04 -2.7030130536322594E-04  
2.1644270429901916E-05 -1.3773814371754488E-04 9.1581008448889491E-04  
9.3811334563210851E-04 7.7074062369105151E-04 -3.1274048761178297E-04  
3.6013032370647384E-05 -3.2655754112680319E-04 1.3292787439311553E-03  
6.8528706345300069E-04 1.0874619189096925E-03 1.5157550402265017E-03  
6.4890138521408710E-05 3.6839244560603454E-04 -1.4918226746125592E-04  
-1.2310063772417128E-04 -1.8914524648840249E-04 -3.5495461323747782E-04  
1.1505827628440153E-04 3.6340001162480501E-04 -1.8233891812146079E-04  
-2.4107394702502271E-04 1.1203278448863231E-05 -1.7008034437791155E-04  
1.7848030846157414E-04 -2.0927207453508085E-05 8.3385722307573510E-05  
2.6813326938527749E-06 -1.7264228867913841E-04 -4.7506945320509346E-04  
-1.3566129098321718E-04 -1.2031267778195892E-03 1.2763364941093132E-03  
-1.7017022012454105E-04 6.8748906992657419E-04 -2.2184700138250403E-04  
-6.9607050735211083E-04 7.7333690363031485E-05 -3.1318524847104653E-04  
-9.6555749213095537E-04 8.3233827134264330E-04 -1.0197288260303196E-03  
8.2814504292272795E-04 2.0867444683585162E-06 -6.6041199115464893E-05  
-6.6646095682719099E-06 1.2040030068219681E-04 -1.7575381508371764E-03  
-2.9590552897114267E-04 -7.4795150557307511E-05 -7.0024940797124154E-04  
8.4375774173355521E-04 6.0678703534343826E-04 8.7955090138355731E-04  
-2.3963470502306889E-04 8.1425920942254017E-05 -6.3123939045076343E-05  
-1.9997360872651801E-05 2.1396695201108843E-04 1.6015654157241376E-04

-1.2790766609546906E-04 3.0562406466807928E-05 -3.6269140411736018E-04  
9.3055524310138243E-05 -4.3745498845100121E-04 -2.3554501058278615E-04  
4.1792424537741234E-05 3.7734610031784060E-04 2.1281611412724664E-04  
-2.9265082196864033E-04 7.0627969438104391E-05 2.1999158797399688E-04  
-1.1456439534482362E-04 3.6166500613979175E-04 -6.2087456595417674E-04  
-1.2751401000701986E-03 2.9799346016368925E-04 3.2775419302320059E-04  
1.2339535552489558E-03 -1.1780821547975585E-03 -5.7379438174694466E-05  
-1.2038238012294215E-03 -1.0712490389479788E-03 -6.8817278654863224E-04  
-6.4779924742880142E-04 -8.0038439953482071E-04 2.2653870184524371E-04  
-4.2128559196985131E-04 1.6248865560106432E-04 -2.2940011033828232E-06  
4.1942792406480892E-05 1.6321143551934795E-04 -5.4338134595163601E-05  
-7.4031082434925617E-04 1.2466804721432687E-03 1.0719962862085124E-03  
-5.1708689401459490E-05 -2.1011402297466477E-04 6.9409864336107677E-05  
-2.5907131994087874E-04 -7.0620994703157771E-05 -2.4814630700993357E-06  
9.4155145017751018E-05 -2.3393933957516241E-04 -2.4565994468262744E-04  
6.7266908556201167E-04 -3.5821807006864424E-04 -2.0359362127587703E-04  
3.5405839042062941E-06 -2.1251907112159439E-04 -2.5569323052106115E-04  
-7.4483622264306595E-05 1.4343893740235644E-04 9.1492797264902803E-05  
-5.9991800583952164E-04 7.0264226212529615E-04 1.0638662529734756E-03  
1.5316656838620429E-03 8.2439820384637286E-05 -6.1839030785997831E-04  
1.1473414561923373E-04 -3.5476932180539196E-04 2.4654982061993587E-04  
1.1573817600403883E-06 -3.3088294655798321E-04 -1.1641094435518571E-03  
-8.2583928283438588E-04 1.1799521717593611E-04 2.4913291108518814E-04  
-9.8777188013890243E-04 -1.0706246136913907E-03 -3.4686777055862862E-04  
-8.5931458138618824E-04 1.8500622862416746E-04 -5.0275863128688145E-04  
1.0971040693179104E-03 2.2740984812526401E-04 3.4376000796222433E-04  
-3.5754774052088338E-04 1.2745927056347328E-04 -2.9202075951197581E-04  
-9.4431688392909615E-06 -5.8716477685214855E-05 7.4719706177164014E-05  
7.4375121732008715E-05 -1.8174678986374493E-04 -1.2123991293404635E-04  
1.2324999715540127E-04 2.9862396536073317E-04 2.1336226774788317E-04  
2.4852865548171061E-04 5.2883824846685279E-04 -1.7538065556053413E-04  
-2.8068533483431316E-05 -2.2319523290757954E-04 -5.9737320502605950E-04  
6.8056444571318797E-04 2.3621861036694214E-04 -2.3514846531539791E-05  
7.0733131775877277E-04 -4.6770136356427894E-04 -1.8837709931524233E-04  
-8.9817054849612751E-05 1.9999869452102478E-03 1.8757539878226753E-05  
2.6909656034279124E-04 3.6905549424484391E-04 -7.6545425468621151E-04  
-1.1734675539870070E-03 -1.1013385756697036E-03 8.2046405311074437E-05  
-5.5382149824034972E-04 5.8061834814147428E-04 -3.7177279142331651E-04  
2.6053740956483732E-04 4.5943627518299415E-04 2.8654972358475194E-04  
9.7594930286880365E-04 -3.9499126429195369E-04 1.0914173612844003E-03  
7.0100337139313099E-05 2.4415869523505232E-04 -2.0285685410145976E-04  
-2.5658186373789424E-06 3.7145031614439073E-04 1.5910022085339915E-04  
2.2689552076373190E-04 4.6667975646818384E-04 -2.7894861764383609E-04  
-3.4424633148872241E-04 -5.6462211357871264E-05 -2.1775088543758064E-05  
-7.4546459530741422E-05 3.1467693132788152E-04 3.7854918691044185E-05  
-1.5056736279629902E-04 1.0888569121370614E-07 -1.4033033774786188E-04  
-1.8168400236141341E-04 -4.3307008312984391E-04 9.8616690929740537E-05  
6.0280332748241267E-04 -2.7903348557062829E-04 -3.8933885309500911E-04  
-1.0494999090407890E-03 3.0135147721090089E-04 -6.4010172483992063E-04  
7.3971380584985399E-04 9.3298822511583693E-04 -1.6676387544390362E-04  
-8.5248267305447560E-05 -6.2209924005405387E-04 4.3609275538204772E-04  
1.2438742607448641E-03 -8.1828239436632772E-04 -3.1341993560071740E-04  
1.2436792377896202E-03 1.6797440749495530E-04 -1.0461876202895089E-04  
-3.5186941874590946E-04 4.1220959164694821E-05 -3.5689249129901003E-04  
-2.4631011494462983E-05 -3.6111239857597796E-04 8.3745583423669190E-05  
-2.8117419331653181E-04 -3.6898540916754488E-05 -3.9680710820170349E-05  
1.2057673234043750E-04 3.2949809376254326E-04 -2.5291083572801334E-04  
2.8451082199345689E-04 -1.7631306151060200E-04 -1.5487879546421032E-04  
-2.5184974359865607E-04 -1.3473693482644685E-04 -3.7490875463339301E-04  
-3.7002016406245539E-04 4.6072714903057046E-04 -8.3458962309229047E-05  
4.2298513766680549E-04 -1.1137559998966413E-03 -8.2949382086617738E-05  
-1.0914893679569960E-03 1.3511189360706237E-03 -2.1927455954501247E-04  
-7.8833114292736555E-04 -7.8348779957762419E-04 -9.6525990789843774E-04  
-8.2392484310095653E-04 -2.2812456178944806E-04 2.4753136177345093E-04  
-9.2488556402382793E-04 -1.7095506057655826E-04 8.8568877347680261E-04  
-2.2417410249978145E-04 -8.3132767522264511E-05 2.7487316243302506E-04  
6.0120843332143862E-04 -2.4240922831509696E-04 -1.7468327883890327E-04  
-7.6853000587199117E-04 5.8688863879050555E-04 -3.4440154698483735E-04  
-1.2870992870484316E-04 3.0709558829736510E-04 -1.2453574651102590E-04  
-5.0200521845144891E-04 9.2263017772884788E-05 -2.1132542331419614E-05  
-2.6747815891515662E-04 -5.2577779672386478E-04 1.2855676364480087E-04  
-1.3248705875204780E-04 2.0207021864324966E-04 2.6391966300342629E-04  
1.4444306352734233E-04 5.7516212953543027E-05 -1.6510017619307004E-04  
1.8933997125907090E-04 -4.9989429766290215E-05 1.5116395470513215E-04

1.1802596032251080E-03 -7.5411928180818414E-04 4.6928747264818820E-04  
-3.3201316874820685E-04 4.6840496770260621E-04 -5.5699520236799673E-04  
3.4023080263652101E-04 -4.9299587898719323E-04 -1.3957131507152099E-04  
-8.1095500460545526E-04 9.4251119333000434E-05 3.1124927630148580E-04  
5.7262439983368850E-04 -6.8612753142959252E-04 4.8191659640585443E-04  
1.1856638736069681E-04 1.3677739790046350E-03 5.1066410738918086E-04  
4.6011500127008936E-05 -3.6926167060594633E-04 -1.5204851073818452E-03  
1.2629067150264498E-04 -4.5425037585226512E-04 -3.2414536308671452E-04  
2.4059057820081928E-04 1.5364102402409869E-05 -2.0709525933944014E-04  
1.7701359274422562E-04 -1.1990807819600880E-04 -5.2707859854197286E-05  
1.1552058529903800E-04 -2.9136515929532390E-05 -2.9108651015303430E-05  
4.8817118105942795E-04 -2.9900500712425998E-04 -2.7382858827945670E-05  
4.9103501907120080E-04 -2.9663701672775963E-04 -1.6985288691125452E-04  
-3.0641738710766463E-04 -2.8891831753130554E-04 -2.0618929749852623E-05  
3.2744231685194903E-04 8.2013504455395552E-04 4.1397147076633917E-04  
-1.4117207979136672E-03 -9.7109963654631469E-05 -6.1572367629023062E-04  
3.2539057348467587E-04 1.0039884621302734E-03 3.7505465429052674E-05  
-9.3683127511794259E-04 9.1491654983558775E-04 -4.7859613608385439E-04  
1.1073242534293500E-05 -7.8978506118938775E-04 -1.2109405640083736E-03  
4.3197115223008028E-04 -4.4483135006599846E-04 6.0954830474256301E-04  
2.7286671003474972E-04 -7.9209393064078883E-04 1.1550465491534428E-04  
3.1805946287463655E-04 -1.2405330704984418E-04 -9.8705708029282133E-05  
2.6171796632965639E-04 -6.2824466649084670E-05 -1.3053631472221866E-05  
5.3193729914876327E-05 4.7895282868425618E-05 1.4639962300558213E-06  
-1.6512877111136403E-04 -1.2392972743915421E-04 6.5885028182431302E-06  
-1.6319863345730907E-04 2.3744614721790211E-04 -9.8386108618572402E-06  
-3.1721067596264784E-05 8.3668035197378838E-05 2.1490906472590118E-05  
1.8992864173725276E-04 3.4076045819225964E-04 -2.7018852417734273E-04  
6.9027828343792299E-04 4.0650644428956033E-04 -1.6919635858455843E-05  
1.4607114148816791E-03 7.3206086900843128E-04 1.0938355060170341E-03  
3.2116776110209229E-04 -1.2883553586288162E-03 -1.7804017645315585E-04  
-1.5652912785008065E-03 5.4823627779715574E-04 -2.9632936444177654E-06  
-1.4537390513545618E-03 6.7645008209737143E-04 5.1084069637630247E-04  
4.0521729325363322E-04 7.4814447880091597E-04 -6.1801773671009408E-04  
-8.9902429535155203E-04 -7.2527832082402001E-04 7.5490020875696037E-04  
1.0298059771832622E-03 -2.2795017558785086E-04 7.6338441157075641E-04  
1.2177964626318998E-04 4.0951655065643183E-05 -5.7544085573303553E-05  
1.6395808418363252E-04 -8.0177606882994164E-05 -1.3105909141894286E-04  
2.7622508957062409E-04 2.5665973072586779E-04 3.0576634326417496E-04  
2.8984296219511515E-04 -2.9633691354335177E-04 -2.9435390516356630E-04  
-7.1675632723282900E-05 -8.9461709588164732E-05 1.9291134254467815E-05  
1.7696745314589436E-04 -3.7061651529366076E-04 -2.4400459204884463E-04  
3.5575678066737365E-05 1.1440875339925553E-05 -5.0276277447590357E-04  
-1.4383727308589465E-03 -1.2360644512486853E-04 1.7037728795934047E-03  
1.2179490302140130E-03 -7.0957632253756747E-04 -6.4697107481082459E-05  
-7.7198333896560467E-05 4.7478543901391092E-04 -1.7051257990328094E-04  
8.0576487213718869E-04 -3.2906803314976490E-04 -4.5459864880289760E-04  
-5.7579895242788675E-04 -2.9771646053824166E-04 1.2470041123689238E-04  
2.9158592072131833E-04 6.9024197525768881E-04 -6.1620179974573495E-04  
1.1229083735664988E-04 1.8579784506816979E-04 -8.0464219550125608E-04  
-8.4738046407206881E-05 1.2999042725299494E-04 -3.7727886805992023E-05  
1.6874253875528091E-05 -7.2145362911143202E-05 -2.9404604252377601E-04  
5.1523362183604289E-05 -6.3125175710621647E-05 -1.8472533551207809E-04  
9.2105434106372051E-05 -1.7434776563493923E-04 -3.5587998722890796E-05  
-1.5455638675561237E-04 1.1143024434532230E-04 3.0202920331038582E-04  
3.0624265151160634E-05 3.7277645604276438E-04 6.04777033507861880E-05  
-7.7112216350065836E-05 -3.8929153954145791E-05 -4.428945424240456E-04  
7.6903396975357293E-04 -1.4185800348045914E-04 -7.6925580698395291E-04  
-3.4611345876308747E-04 5.8972090546607350E-04 -2.8784392121250794E-04  
2.7829628245133492E-04 7.0348010937411245E-04 -7.5030011051974350E-04  
3.6517508701195350E-04 8.8929339822958620E-05 -1.1134425842398016E-03  
-2.3604769823243067E-04 -2.6684124608624402E-04 6.2634404597034681E-04  
-1.6487946305220464E-04 -5.7752605806974747E-05 -9.9642636678615000E-05  
6.2035657797704174E-04 -9.9195289689068308E-05 5.5674822850087515E-04  
-1.9198793646564531E-04 -2.8506082973387964E-05 3.3864646952443524E-04  
-5.8506356559564906E-05 -6.6704764431319219E-05 -1.9164763614056259E-04  
-2.6554170321190526E-04 -1.4005993985081295E-04 -2.8917918329653309E-04  
-2.1359206295222324E-04 -1.1701719687426225E-05 -2.4710683647796472E-04  
-6.3800271418368965E-06 -4.0586833865706303E-05 -7.2920655271151277E-05  
3.9338131052312750E-04 7.1844128732457784E-05 -8.3939447178790427E-05  
5.1912464123570617E-04 4.0706348782013334E-04 2.9041584723310046E-06  
-5.5331860980876069E-04 7.5844118839537211E-05 -6.3118533546330181E-04  
3.9149361057248566E-04 5.7733685487574757E-04 -3.9178509575788184E-04  
7.2213607334264837E-05 -3.5354710281836912E-04 8.1634045851855389E-04

-1.1737031010989516E-04 4.9635943367029763E-04 -1.0283286887354690E-04  
7.4226366248371226E-04 -6.7879832399091433E-05 -9.2280513110845253E-05  
-1.7338025661455510E-05 -1.1091187779892833E-03 -2.6849386896644195E-04  
2.9151617423121753E-04 6.8190690304750399E-04 -6.5250144669575433E-05  
2.0820583515339250E-04 1.1626552242486463E-04 -2.1193976870940518E-05  
1.0256900764622087E-04 -4.8917424475068195E-04 -8.6137264524291122E-05  
3.4615290132415465E-04 -5.1672177304030521E-04 -2.5974426819244748E-04  
-7.3858946696952381E-05 -2.0960808902735435E-04 1.9163014810683824E-04  
-1.4059197579218492E-04 -1.6834447149131107E-04 1.3188494884550290E-04  
2.1419609314808681E-04 -3.0087395877779869E-04 2.9616690148964633E-04  
-1.7994026814107539E-04 -1.9120900206501181E-04 -3.5279731218097033E-04  
-7.5261002335595890E-04 -4.0430143604938988E-04 -4.4835657568152981E-04  
-3.9987351745434752E-04 1.0687239062319194E-04 -3.7795662979485503E-04  
1.2402162682698413E-04 -3.1479314224378522E-04 1.1292951295034524E-03  
7.3490763851180758E-04 9.9254021852926725E-04 5.3294146280529614E-04  
7.3564432536117749E-04 -1.2545328111901513E-03 1.3227534318447681E-03  
2.7729853072175017E-04 -5.2394558437061966E-04 -1.897324163465360E-04  
-3.8715466521504089E-04 -3.3674631279538147E-04 4.2709449986757770E-05  
2.6511787377448082E-04 -2.8069713873472548E-04 -1.1056299320231819E-04  
1.6077730084022786E-04 -2.3765655813469028E-04 -1.4391678366553806E-05  
-4.6645319402017729E-04 9.0356146688911804E-05 2.3174695769562862E-04  
-1.8591135196837743E-04 -5.4054479957902911E-05 -6.4684102463706810E-05  
2.0807251374074998E-04 -1.2508945373550939E-04 2.3520618802534970E-07  
2.9931820471896148E-04 3.7787589620348101E-04 -2.4703287277169492E-04  
-8.5656349190167788E-04 -2.3908861416912738E-04 4.2396570028984640E-04  
1.3965889412890233E-03 -6.3298086634531070E-04 -8.0940303678643608E-04  
-2.6051035352716982E-04 1.9546064012277873E-04 -1.0983540754365246E-03  
-5.0726659484826150E-04 2.4649370590181408E-04 1.7241163338799462E-03  
4.4210609205426671E-04 1.4048469686350324E-03 -1.1820565569703844E-03  
7.0508621436517378E-04 6.5804787336501923E-04 1.0198654542156383E-04  
6.9663791328207958E-04 1.7203340564634281E-04 8.7387546827956603E-04  
5.1485024068361992E-04 -7.4913296845888916E-04 8.5102227058312925E-04  
1.6919156635003961E-04 -6.8540877091718716E-05 1.0679442548494079E-05  
-8.3043022368445093E-05 -4.0010244587556325E-04 -3.2725480359251171E-05  
3.9787488351600095E-05 2.9216968865057407E-04 1.0365968306492619E-04  
2.2152517138530441E-05 -9.0830432274624688E-05 -2.2146835272537677E-05  
-4.6038967836843501E-04 -2.8447436999955801E-04 -2.3534794226591065E-05  
2.6275433472550727E-04 -1.4262467888358668E-04 -2.9290568923412825E-04  
-4.9917717677432950E-04 5.3032743801475341E-04 -2.9522922679614939E-04  
3.6514783765218895E-04 4.6663129313886205E-04 4.8715051787629545E-04  
8.4369310987663358E-04 -7.0318916991216297E-06 -4.3628671824927985E-04  
1.7078254255533155E-04 1.1446380886289268E-05 -6.1903471962525996E-04  
9.2174241226325270E-06 -4.4923397490271021E-05 -4.5739111268249395E-04  
1.6011329207416019E-04 6.9729915565538958E-04 3.9028582070712718E-04  
1.0505668163977907E-03 5.7799924167912431E-05 3.7409379408418050E-04  
7.3507252669500860E-04 -1.4593472868212338E-03 2.0187707713043099E-04  
-3.9930558627257896E-04 -5.4730944771489713E-05 1.2972512648897082E-04  
3.1194678704916777E-06 1.6570891242439950E-04 8.8694859828876597E-05  
-6.9328129440622267E-05 8.3896526145241780E-05 1.0648849392194990E-04  
5.2837675034444109E-05 -3.0186014212293664E-05 3.2907026047718707E-04  
-2.3127231747376262E-04 -3.5464634179381338E-04 -1.5298550057250523E-04  
7.635512515217504E-06 1.9204280716277679E-04 -2.1291353389699737E-04  
-9.9720191929257335E-04 -6.8007953591273811E-04 3.3693643424417896E-05  
-1.7954077287025833E-04 7.3655624485199694E-04 -6.0024234189473146E-04  
-1.7201283294933392E-04 -7.6875900434867652E-04 -1.3072000285893868E-03  
5.4643913998630387E-05 6.3187357885940293E-04 8.2582793250750340E-04  
-6.5496514791192026E-05 2.0904602651539099E-04 3.8932178724198881E-04  
-1.7459506876678657E-05 2.4439563984105997E-04 1.3165765599289512E-03  
8.7563891742883102E-04 -9.9239716807686331E-04 8.8839838724613499E-04  
-4.0959992419528723E-05 -8.5564596656557274E-05 6.3217747007529373E-04  
1.1179253815272169E-04 1.1911410576097668E-04 2.8418200891784363E-05  
5.9852377380383625E-05 -1.6516513735819588E-04 2.6423855658681686E-05  
2.8405036220823323E-04 2.5937249584374720E-04 3.0561023122146790E-05  
5.8724476531402473E-06 1.6012563975333096E-04 -1.3817682703707562E-04  
-6.7402117869195255E-05 -1.6205162308784296E-04 1.1230072994888635E-04  
1.6003907009274959E-04 2.3480614088497228E-04 -4.9463466738216690E-05  
-7.3515796908003991E-04 1.0257341995188816E-03 2.3561848464364265E-04  
-3.3243158253782928E-05 -4.0106669252175343E-04 -7.7968850183888279E-04  
-1.6911128324994805E-04 6.7147660009782165E-05 5.0390174756605676E-04  
-2.2418716448496741E-04 4.4324813335909281E-05 -8.1118650915210522E-04  
-1.0472586535298025E-05 -1.5071317168939346E-05 -8.1777622315081996E-04  
-9.6281815493575839E-04 2.1363658156871499E-04 1.5686451372632994E-05  
7.2725002588930229E-05 4.5238265866788942E-04 -7.5262377307540651E-05  
6.9306277767690533E-04 3.7780975263742369E-04 2.2507306324426004E-04

-3.3702737597001052E-05 -1.1011719122855842E-04 1.0315257130670617E-04  
2.2904364774011312E-04 -2.2152178390516885E-06 -8.8997440860162343E-05  
3.5140043615000140E-04 8.4211522517173434E-06 -8.2747183570171934E-05  
-1.8853215399193689E-04 -1.5142948577122169E-04 -4.2276010816471152E-05  
1.2284859317816089E-04 -1.9651393837343364E-04 3.9161370141883438E-04  
1.5371475184402985E-04 -2.0150360179133910E-04 -8.5809288906642334E-05  
1.4712533580807488E-04 6.8604276400629680E-04 1.0887469418365938E-03  
-6.7212311162266527E-04 -8.3948818224067361E-05 1.3887237749289733E-04  
6.0591656204281948E-04 4.7368166184011661E-04 -3.8496345622621213E-04  
-5.3580653939578747E-04 -5.8567880598281430E-04 5.2289362441461884E-06  
-1.3819693586684190E-03 1.1723812350769388E-04 -8.0506960415225042E-04  
2.4608944921663135E-04 4.7422483758303801E-04 -6.6205426063610669E-04  
7.6677579798948800E-04 9.0227659598674328E-04 4.9821005683765819E-04  
5.3364139437938013E-04 -4.5145842804656233E-05 -8.1540867225006030E-04  
-2.6981590697432975E-04 1.2519001700001962E-04 -1.2376949240226967E-04  
-9.1598103203195894E-05 2.4227973626178556E-04 2.6468667317056137E-04  
-5.3923580805004757E-05 5.1124538599163306E-06 -5.2752521406547600E-04  
-2.9191126673605832E-04 -8.5073026603105681E-05 -2.8414053013810182E-04  
-1.3235193940150744E-04 -3.9804169671528634E-04 -3.4348298303187063E-04  
-4.1519648964990629E-04 6.3614055191041276E-05 1.0403190637719624E-05  
3.3197168467919899E-04 -1.7160287677205266E-03 -4.0484890815005822E-04  
8.7077708765810190E-04 1.4856242872198847E-03 7.7622125599868471E-04  
1.0412949303152757E-03 2.3632364890980516E-04 -9.0850223365486580E-04  
1.0352329116529763E-03 7.5185127200562191E-04 1.2884390044802527E-04  
5.8048678606740112E-04 6.6560311564213288E-04 -4.5414825417056055E-04  
-4.1277539842174107E-04 -6.5843820337561985E-04 4.3743966471452076E-04  
2.7183994911883443E-04 -1.0682394337359288E-03 -3.5598570579872840E-04  
-2.9308030666474837E-04 6.1070588480033610E-04 8.4917115108285274E-04  
4.5334943615808826E-05 4.5681414340989975E-06 -1.4259756689307174E-04  
-2.7244836052881221E-04 -8.5945761575353743E-05 -4.3871822788010684E-05  
-1.9767492617785379E-04 1.2527663067213874E-04 2.0418032868824122E-04  
4.0430534175650242E-04 -3.2162821986400029E-04 5.4114341394477321E-06  
-2.5799561786866537E-04 7.7965266652497056E-05 9.6352812607417175E-05  
-2.5053435912808032E-05 -2.5053675941003723E-04 -4.4235153758112117E-05  
5.6622811224401942E-04 7.1041441064582532E-04 1.2304801576197384E-03  
-5.9807612046423289E-04 -1.4705658949766900E-04 7.2957734882301531E-04  
-4.2973762794388506E-04 -2.6615841481850063E-04 -6.8555152040213605E-04  
-5.0788036558991885E-04 1.9256466378477486E-04 -4.6031586002502509E-04  
-3.2967624899477987E-04 1.1168958798666306E-03 3.5327378053203227E-04  
4.8584161103937560E-04 -3.6379950439871045E-04 -1.3614838827655346E-03  
-1.4251091910820498E-04 1.0107941035599280E-03 -1.8759287116191709E-04  
-3.1043583934222389E-04 3.7037209629359088E-04 9.4509354540066399E-05  
5.6908872199520159E-05 -8.1773146559406583E-05 4.6399686228686945E-04  
-5.7164539732488693E-04 -9.6932615838279839E-05 -2.8758112136667303E-04  
-2.1047010639624179E-04 -7.3760677480664950E-05 -2.9488750249075574E-04  
3.0436528195582660E-04 6.6486720370118849E-05 -5.6949869758477574E-05  
-6.6228179000526034E-05 2.4590603048486263E-04 -1.0828495257609521E-04  
1.4076906624843917E-04 -1.3130137185097493E-04 -1.5704917314155833E-04  
-4.0808995480724649E-04 3.7743334704395400E-04 -2.6562662145424890E-05  
1.1142937558519038E-03 3.1835679031635652E-04 3.2883873548533358E-04  
5.6747966097589551E-04 -6.5248026769512181E-04 -1.1343372729080601E-04  
1.5053471910659222E-04 8.6607304266064365E-04 -1.9904042150707302E-04  
7.5546208690823586E-05 -2.7513549318779890E-04 -1.4463942526849038E-03  
1.5838443214551609E-03 -1.4386945037893735E-04 5.7841449291177376E-04  
-5.8268282193768605E-04 -5.2733109213044490E-04 -1.1673913526268737E-03  
8.5411446420857599E-04 -2.8298333611531266E-04 -2.8806500775550444E-05  
-1.3296980934906363E-04 -2.8752869101532753E-04 8.5863844008795797E-05  
1.8616572922873202E-04 1.1893380882408244E-04 8.6379142181477239E-05  
-3.5250857103559746E-04 1.5665312381334085E-04 8.2287914816563627E-05  
1.5628099015720285E-05 -1.9235833665413600E-04 2.0125529533014530E-04  
-1.1652528641384034E-04 1.0587163407798191E-04 -6.5143931820008710E-05  
-5.9161316725812710E-05 4.855532880824819E-05 -8.6693650995551578E-05  
4.8481662379198839E-05 6.5365782092223165E-04 -2.3738453834745989E-04  
9.0168812362250849E-04 1.8672248516959648E-04 1.0570314127981931E-04  
1.0432711706268847E-03 9.7484958497549867E-04 -1.0802292867772834E-03  
-1.0709170592285147E-03 -6.1109077692486418E-04 4.0903764011455208E-04  
-1.1005697783203591E-03 -2.0283589343744336E-04 7.0514177373948866E-04  
-7.1265094941568637E-04 -1.2426369416746765E-04 5.7736374570318946E-05  
2.6258529257257816E-05 -6.5103099827809661E-04 6.3680396675397789E-04  
1.3891843515749267E-04 6.1379900178709364E-04 5.3412796960101625E-04  
-2.7336934833408719E-04 -8.8190953135623454E-05 3.8170393259757145E-05  
-3.1874701740593816E-05 2.9692254420630906E-04 1.8490899682776073E-04  
-3.5554003825387229E-04 -1.8038603651548851E-04 6.0689028020045202E-05  
3.5585887371536332E-04 9.4694741504796853E-05 1.2728553651644042E-04



7.7521292812907796E-05 -2.8262846334102651E-04 -1.0672299846347502E-04  
 -2.8174267071522397E-05 -2.4811274887812253E-04 -3.7037970237551718E-04  
 5.1754154287122882E-04 -9.3935274155171171E-04 3.0299113530237449E-05  
 -1.9744425176279392E-04 -5.0264527082398213E-05 -8.2335143745983122E-04  
 -4.6416761505573283E-04 1.1740940484834344E-03 2.4030423909691051E-04  
 1.0735210172500671E-03 -2.3505730012321317E-04 -7.4289206515161142E-04  
 6.6326230573805734E-04 9.8594198502955483E-04 5.6927926394413159E-05  
 3.5780820468682189E-04 -4.9766504441846869E-04 6.9566533790291034E-04  
 -1.0583256636202609E-03 -1.0391857411535944E-03 -4.8705505559480092E-05  
 -4.7400849014124323E-04 1.7123829066407632E-04 1.0565501320331501E-03  
 9.6418383919244659E-05 -8.0201762668096740E-05 -2.6025896877495156E-04  
 8.4059858691361671E-05 1.8880120734002291E-04 -6.6362750493614356E-05  
 -8.8419020078807654E-06 -2.4929512384532675E-04 9.0874411302136024E-05  
 6.1945149315746010E-05 -6.9315092504362104E-05 -1.8661359145035413E-04  
 2.0812575074683271E-05 -3.2562852302298474E-04 -3.3804154280159287E-04  
 -3.8025447963105184E-05 2.5060685754139977E-04 7.8034077382994982E-05  
 7.5228167484652376E-04 -6.1534471219412928E-04 7.9792438590198418E-05  
 1.1336612301540195E-03 2.4682344348890160E-04 4.6246247900760525E-05  
 2.1782977025416703E-03 7.5390676609182077E-04 6.2584011786763808E-04  
 4.3608383276538977E-04 1.1267824740538465E-03 1.9525206896125560E-03  
 1.1454405383076322E-03 4.4155514910995225E-04 -9.9432436830169469E-04  
 6.4580041304012356E-04 4.8349227650624832E-04 -1.3804301290011630E-04  
 -5.6689779753233294E-04 -8.2388389777724043E-04 9.8436536340618997E-04  
 9.5887806773960606E-04 2.3167328259991180E-05 -8.5740777526843002E-04  
 6.5727635778360454E-04 2.2629067835685277E-05 2.5664977282411966E-04  
 -6.6980948895346859E-05 -1.7078747280802213E-04 -6.8525171538200540E-05  
 1.0010513863638056E-04 5.9364754577018219E-06 7.0145376356193348E-05  
 -1.7450633331946613E-04 -4.4028065154355785E-04 -2.3098271899233473E-05  
 2.2862436904456056E-04 5.1028548515807739E-05 9.0221104402900729E-05  
 2.1119068046534766E-04 1.2029272988183063E-04 -4.3367796645684092E-04  
 -1.3628825211117687E-03 2.2605668725695757E-04 2.2519750145347920E-04  
 -2.6517812302930053E-04 7.7058668613080882E-04 9.2845818173265091E-04  
 2.4848064854090894E-04 -2.7489125983720810E-04 -7.3487255262373054E-04  
 3.4349572666585306E-04 1.3681383919598978E-04 -4.2353172667546432E-04  
 -8.0210450698205257E-04 1.5386683263836400E-04 -3.7589521396893947E-04  
 6.4937912227654388E-04 -3.4342737523167282E-04 -3.2724727358905529E-04  
 8.2215792573736091E-04 -7.3641487388608894E-04 6.1097582124435638E-05  
 9.2341811560177814E-05 -1.1503221033998692E-04 -3.0269981927198827E-04  
 2.8089273150255881E-04 2.0547443296025059E-05 5.3342878041079443E-04  
 4.6144564762289736E-04 2.1948633543037273E-05 -7.4882165895863116E-06  
 -1.1243900696031409E-04 1.987857006869693E-04 4.8291653165048404E-05  
 1.5578021971400921E-05 -5.0637135440705539E-04 2.7401757800222262E-04  
 3.7165933762753501E-05 -2.9122595434866898E-04 -1.6299731032509853E-04  
 1.4641545461902057E-04 -1.4317162158973497E-04 2.6809797616618644E-05  
 -5.1936069548692734E-04 7.0030602582369186E-04 6.7988379938126794E-04  
 -3.5175457773978735E-04 1.7727067231656615E-04 2.5778467891635922E-04  
 4.4233182342679212E-04 9.8237930760473424E-04 -3.6344063032031952E-04  
 2.6179265400234306E-04 -3.3219813762540079E-04 9.0316461292045021E-04  
 6.8328121438076433E-04 -8.1104173081075748E-04 -1.5680669500384313E-04  
 2.3124557296301884E-04 6.6262615857891035E-04 2.6230460145979146E-04  
 -1.7315907459232577E-03 -7.3258591890040597E-05 -3.5092666478249099E-04  
 -5.0533598618448204E-04 1.6355955531395530E-04 7.6564879599634453E-04  
 -2.5348093911660115E-04 -6.4492201157084972E-05 -3.9573749084608391E-05  
 -9.6879200403133113E-05 -1.3062314271155312E-04 -1.6713101297011356E-04  
 1.8589078462431335E-04 1.0015078393379079E-04 2.2457415437826471E-04  
 2.4662550240129428E-04 2.7035219277989976E-05 1.4921504472421683E-04  
 -3.0398392648496250E-04 -2.4266900387649303E-04 2.9542185665171449E-04  
 6.6930137252340215E-05 -1.5626889527240007E-04 -1.9834550067147878E-04  
 -9.3042385784617706E-05 -3.4226047559318679E-04 -1.2238084497997209E-04  
 -1.55815488813211937E-04 1.1854583779571466E-03 -1.3893799326996435E-04  
 1.8380697856698396E-04 -1.8048681942250263E-03 1.3395948614293064E-04  
 -6.3977110367462685E-04 1.2417410990445529E-03 1.6604297086998448E-04  
 2.1560182577614088E-04 4.3865891135686251E-04 -1.7340583714368986E-04  
 6.1451356134817347E-04 1.3322847705282302E-03 1.4031614028285231E-03  
 1.7845687982757333E-03 5.6671197374740434E-04 -1.7575082113074808E-04  
 7.4184230620046206E-04 1.1719956012359095E-03 1.0557539168295745E-03  
 1.8649447517479908E-04 7.8674218698947433E-05 -4.7065382111243428E-05  
 9.6002487580880435E-05 -1.5040445580471052E-04 8.9525504874313303E-05  
 -3.3152281945918676E-05 -1.6289279015357125E-04 1.3808148756713079E-04  
 -4.5081360248187206E-04 -1.3782870278489245E-04 9.0585942343083110E-05  
 4.7450373463949884E-04 2.8634496274861765E-04 5.2284610230147856E-05  
 -2.8278548452639782E-05 3.9949229646497734E-05 1.1364737041661827E-04  
 3.7695728984398977E-04 -6.1548147659605805E-04 -7.8530651708813440E-04  
 3.1350361644642361E-04 -6.3612252673941915E-04 5.8112806347526572E-04

```

4.4142697006390808E-04 -1.4961936709119895E-05 3.1212512910617661E-04
-4.1850084718643242E-04 1.6518650590327666E-04 1.3541990510828412E-04
-1.1768713177980929E-03 -4.2422068379688581E-04 2.0824072036585112E-04
-5.2556371052553917E-04 -1.1275697024887494E-03 8.1854539250827247E-04
1.1748418031397078E-03 -2.7539710517086451E-04 -1.2646931160110740E-04
6.0324508345062930E-04 7.3332907433726617E-04 4.8281519206881820E-04
-1.3825424155022200E-04 -1.4124962628779431E-04 -2.4671193578874032E-04
2.5063826741181803E-04 -3.0154147949635799E-04 -1.3787506695656939E-04
-4.6095314209084718E-04 3.2342637605690554E-04 -3.0017140006818426E-05
1.8973995862919875E-04 1.5208495639189179E-04 1.1693985428335704E-04
-9.0530048210208343E-05 -2.2644427792907108E-04 -2.5379341024451169E-04
-1.2343207533134322E-05 1.4125140284566514E-04 -2.7129688590747398E-04
6.7740701952532741E-04 1.7924763870818020E-04 2.0339826336017214E-05
-4.3570293732888557E-04 -1.0588519373305224E-03 3.4921586058945397E-04
3.8098218399831553E-04 7.1353970202895460E-05 -1.0571408448559450E-03
-2.0616948341775480E-04 3.1408387550955558E-04 2.5466895063466473E-04
8.9196014195739247E-05 9.1509145424867148E-04 1.2257065240374617E-03
8.4679017179782004E-05 -9.7301018669609081E-06 -3.7910722485171548E-04
3.3218875205901199E-04 -2.8907137732672641E-04 -1.2990122682957796E-04
-3.7906633542773057E-04 5.0398997926394495E-05 -7.7165942688558196E-04
-1.2373668718371271E-04 -2.5924024593001555E-04 -3.8876889243393505E-05
-4.6007959236939563E-05 1.6960156513620649E-04 -1.9461402929304636E-04
4.6950308390214640E-05 -2.0543433467037504E-04 -4.7207776257856496E-04
-1.0226228882602616E-04 -5.7540775384741852E-04 -3.0420873594920168E-04
2.7311143547614011E-05 1.1181760622160563E-04 6.1156380538601303E-05
1.6882083719751224E-04 -1.1086101390037877E-04 -1.4373765922187886E-04
-2.4347918742680815E-04 2.9933178193549689E-04 3.8118990618017857E-04
-2.851011529314304E-04 -6.1403044507627109E-04 4.8379890306853501E-04
1.4584383026296051E-04 6.8587257858268873E-04 2.3312075180531664E-04
9.3360240097179145E-05 -4.1412234649356990E-04 5.3864602039311509E-04
-2.5605194520214775E-05 2.0837933157931201E-04 7.8193619681600165E-04
&END VELOCITY
&KIND C
BASIS_SET DZVP-MOLOPT-SR-GTH
POTENTIAL GTH-PBE-q4
&POTENTIAL
2 2
0.3384712400000000E+00 2 -0.8803673979999999E+01 0.1339210850000000E+01
2
0.3025757500000000E+00 1 0.9622486650000001E+01
0.2915069400000000E+00 0
&END POTENTIAL
&END KIND
&KIND O
BASIS_SET DZVP-MOLOPT-SR-GTH
POTENTIAL GTH-PBE-q6
&POTENTIAL
2 4
0.2445543000000000E+00 2 -0.1666721480000000E+02 0.2487311320000000E+01
2
0.2209592000000000E+00 1 0.1833745811000000E+02
0.2113324700000000E+00 0
&END POTENTIAL
&END KIND
&KIND H
BASIS_SET DZVP-MOLOPT-SR-GTH
POTENTIAL GTH-PBE-q1
&POTENTIAL
1
0.2000000000000000E+00 2 -0.4178900440000000E+01 0.7244633100000000E+00
0
&END POTENTIAL
&END KIND
&KIND Rh
BASIS_SET DZVP-MOLOPT-SR-GTH
POTENTIAL GTH-PBE-q17
&POTENTIAL
3 6 8
0.4200000000000000E+00 2 0.2620679340000000E+02 -0.4937383350000000E+01
3
0.3454462200000000E+00 2 -0.4524823200000000E+00 0.3892804380000000E+01
-0.5025588850000000E+01
0.3783801400000000E+00 2 -0.9411124199999999E+00 -0.5699310000000000E-02
0.6743510000000000E-02

```

```

0.433747250000000E+00 2 0.157423622000000E+01 -0.301217170000000E+01
0.341548166000000E+01
&END POTENTIAL
&END KIND
&KIND B
BASIS_SET DZVP-MOLOPT-SR-GTH
POTENTIAL GTH-PBE-q3
&POTENTIAL

2 1
0.418991450000000E+00 2 -0.585946171000000E+01 0.903756430000001E+00
2
0.371320460000000E+00 1 0.629728018000000E+01
0.364563080000000E+00 0
&END POTENTIAL
&END KIND
&TOPOLOGY
NUMBER_OF_ATOMS 773
MULTIPLE_UNIT_CELL 1 1 1
&END TOPOLOGY
&END SUBSYS
&END FORCE_EVAL

```

---

### Simulation S3

---

```

&GLOBAL
PRINT_LEVEL MEDIUM
PROJECT_NAME MD
RUN_TYPE MD
&END GLOBAL
&MOTION
&MD
ENSEMBLE NVT
STEPS 20750
TIMESTEP 9.999999999999978E-01
STEP_START_VAL 5000
TIME_START_VAL 4.9999999999995689E+03
ECONS_START_VAL -3.3822048546363776E+03
TEMPERATURE 3.000000000000000E+02
&THERMOSTAT
TYPE NOSE
REGION GLOBAL
&NOSE
LENGTH 4
YOSHIDA 3
MTS 2
&COORD
-1.1835258888451117E-01 5.2719086090882419E+00 2.1946574346032071E+00
7.4540454851586366E+00
&END COORD
&VELOCITY
-9.3447278993970193E-08 -9.1648307781750363E-06 -1.3892360895187544E-05
2.1249831312603600E-05
&END VELOCITY
&MASS
3.6826194659470329E+09 1.6237299232570694E+06 1.6237299232570694E+06
1.6237299232570694E+06
&END MASS
&FORCE
-4.3489553692858236E-12 -5.6529506901932782E-10 -5.0110601530846617E-10 -
3.9210244725891461E-10
&END FORCE
&END NOSE
&CSVR
TIMECON 9.999999999999986E+01
&END CSVR
&END THERMOSTAT
&AVERAGES T
&RESTART_AVERAGES
ITIMES_START 1
AVECPU 1.4770361784357650E+02
AVEHUGONIOT 0.000000000000000E+00
AVETEMP_BARO 0.000000000000000E+00
AVEPOT -3.3830779397144302E+03
AVEKIN 1.0362883327953922E+00

```

```

AVETEMP      2.8793365207549323E+02
AVEKIN_QM    0.0000000000000000E+00
AVETEMP_QM   0.0000000000000000E+00
AVEVOL       5.4800532563775429E+04
AVECELL_A    3.7983495271001452E+01
AVECELL_B    3.7983495271001452E+01
AVECELL_C    3.7983495271001452E+01
AVEALPHA     9.0000000000000000E+01
AVEBETA      9.0000000000000000E+01
AVEGAMMA     9.0000000000000000E+01
AVE_ECONS    5.0757463617513414E+00
AVE_PRESS    0.0000000000000000E+00
AVE_PXX      0.0000000000000000E+00
&END RESTART_AVERAGES
&END AVERAGES
&END MD
&PRINT
&TRAJECTORY SILENT
  ADD_LAST NUMERIC
  LOG_PRINT_KEY T
  FORMAT DCD_ALIGNED_CELL
  &EACH
    MD 1
  &END EACH
&END TRAJECTORY
&VELOCITIES OFF
  ADD_LAST NUMERIC
  LOG_PRINT_KEY T
  FORMAT XMOL
  &EACH
    MD 1
  &END EACH
&END VELOCITIES
&RESTART SILENT
  ADD_LAST NUMERIC
  LOG_PRINT_KEY T
  BACKUP_COPIES 0
  &EACH
    MD 10
  &END EACH
&END RESTART
&END PRINT
&END MOTION
&FORCE_EVAL
METHOD QS
&DFT
  BASIS_SET_FILE_NAME insert basis set path here
  POTENTIAL_FILE_NAME insert basis set path here
  MULTIPLICITY 1
  CHARGE 0
&SCF
  MAX_SCF 60
  EPS_SCF 9.999999999999995E-07
  SCF_GUESS ATOMIC
  &OT T
    MINIMIZER DIIS
    PRECONDITIONER FULL_SINGLE_INVERSE
  &END OT
  &OUTER_SCF T
    EPS_SCF 9.999999999999995E-07
    MAX_SCF 5
  &END OUTER_SCF
  &PRINT
    &RESTART SILENT
      ADD_LAST NUMERIC
      COMMON_ITERATION_LEVELS 1
      FILENAME =./WFn_restart.wfn
      LOG_PRINT_KEY T
    &EACH
      QS_SCF 0
    &END EACH
  &END RESTART
&END PRINT
&END SCF

```

```

&QS
  EPS_DEFAULT      9.999999999999998E-13
&END QS
&MGRID
  NGRIDS  5
  CUTOFF   3.000000000000000E+02
  REL_CUTOFF 5.000000000000000E+01
&END MGRID
&XC
  DENSITY_CUTOFF  1.000000000000000E-10
  GRADIENT_CUTOFF 1.000000000000000E-10
  TAU_CUTOFF      1.000000000000000E-10
  &XC_FUNCTIONAL  NO_SHORTCUT
  &PBE T
  &END PBE
  &END XC_FUNCTIONAL
  &VDW_POTENTIAL
  POTENTIAL_TYPE PAIR_POTENTIAL
  &PAIR_POTENTIAL
  TYPE DFTD3(BJ)
  PARAMETER_FILE_NAME dftd3.dat
  REFERENCE_FUNCTIONAL PBE
  &END PAIR_POTENTIAL
  &END VDW_POTENTIAL
&END XC
&POISSON
&END POISSON
&LOCALIZE T
&END LOCALIZE
&END DFT
&SUBSYS
&CELL
  A  2.0100000000000001E+01  0.000000000000000E+00  0.000000000000000E+00
  B  0.000000000000000E+00  2.0100000000000001E+01  0.000000000000000E+00
  C  0.000000000000000E+00  0.000000000000000E+00  2.0100000000000001E+01
  PERIODIC XYZ
  MULTIPLE_UNIT_CELL 1 1 1
&END CELL
&COORD
Rh  9.6875292299262057E+00  1.1382353828217857E+01  1.0807645997671756E+01
C   8.0413407318752270E+00  1.3072059089492026E+01  1.0742148243697809E+01
C   1.0152238058732566E+01  1.3897393155771336E+01  1.1697426986704549E+01
C   1.3016932114900410E+01  1.3534198704840048E+01  1.1688347794371104E+01
C   6.7519834093509177E+00  1.2305173713662521E+01  1.0583280596579513E+01
C   5.9325093776819440E+00  1.2063446785269361E+01  1.1762909097165503E+01
C   8.8465075973189702E+00  1.3109966486964108E+01  1.1869660180306596E+01
C   8.6774263302004595E+00  1.3789414524522876E+01  9.5110136202216076E+00
C   5.2629675636974884E+00  1.0886065475089042E+01  2.807529323835389E+00
C   1.5145604028662598E+01  1.3211888634599269E+01  1.0599850564533984E+01
C   9.8346357578429267E+00  1.5368428078124625E+01  1.1294186400405980E+01
C   1.0023848045969817E+01  1.3047291585808216E+01  9.3987387457328371E+00
C   4.7634157706093072E+00  1.1305481196479336E+01  1.1634505372989869E+01
C   1.0845506240516173E+01  1.3171446343814591E+01  1.0568513703376640E+01
C   1.3061998784411148E+01  1.2696167686498940E+01  9.4366477583259893E+00
C   6.3650646063458423E+00  1.1760056180136372E+01  9.3384845700594159E+00
C   9.0163323703293639E+00  1.5320682940458646E+01  9.9752983034018285E+00
C   4.4525973769161196E+00  1.0616891904524508E+01  1.0456206098300946E+01
C   1.2354087434478974E+01  1.3097395679038607E+01  1.0566093021917220E+01
C   1.4435912011561363E+01  1.2665867637119026E+01  9.4648571280431604E+00
C   1.4370126202952537E+01  1.3631077964860584E+01  1.1724244188858435E+01
C   1.2473694856002149E+01  1.3871740653178382E+01  1.2585645928431575E+01
H   1.6232817544267316E+01  1.3240971356089402E+01  1.0570551442754677E+01
H   1.2572321378402856E+01  1.2465693434872048E+01  8.4974550771868795E+00
H   1.4967194432291084E+01  1.2372676050330757E+01  8.5266854404497501E+00
H   1.4723729777505703E+01  1.3972275009763651E+01  1.2710252715803831E+01
H   6.1264713115339910E+00  1.2428096897494834E+01  1.2741496823140348E+01
H   4.9653604998495586E+00  1.0423362529062577E+01  8.3246542936376979E+00
H   4.2008844487173240E+00  1.1184429952691392E+01  1.2557998282850718E+01
H   6.8407617261769431E+00  1.2051045029671000E+01  8.3860195866202751E+00
H   3.7103897352030217E+00  9.8868849218456134E+00  1.0393052061677832E+01
H   1.0819697832713118E+01  1.3867575162831951E+01  1.2494954546659732E+01
H   8.0961480151057259E+00  1.3689399198776831E+01  8.6083859260772542E+00
H   9.3422904224195840E+00  1.5793179859805083E+01  1.2189855165923897E+01
H   1.0829687780323715E+01  1.5804900144223220E+01  1.1103135038547377E+01

```

|   |                        |                        |                        |
|---|------------------------|------------------------|------------------------|
| H | 9.6766116988410680E+00 | 1.5824745994306181E+01 | 9.2443613289183286E+00 |
| H | 8.1395639134226201E+00 | 1.5987376816290032E+01 | 1.0055789515981770E+01 |
| H | 1.0285567613714052E+01 | 1.2536202900492373E+01 | 8.4077039985949504E+00 |
| H | 8.4409945376313296E+00 | 1.2825643061911492E+01 | 1.2805230727313699E+01 |
| C | 1.0587753631100085E+01 | 1.0051229718156744E+01 | 9.4374682836700732E+00 |
| C | 1.1906974357485334E+01 | 9.5673835267028924E+00 | 9.4383239964294141E+00 |
| C | 9.8272697347367401E+00 | 9.7681272592366479E+00 | 8.3017036375256001E+00 |
| C | 1.2539204433457018E+01 | 9.0414717639721456E+00 | 8.2957538192580209E+00 |
| H | 1.2485198859928664E+01 | 9.6694590984931263E+00 | 1.0368196999748100E+01 |
| C | 1.0395665166744049E+01 | 9.2391295088990351E+00 | 7.0765603113349052E+00 |
| H | 8.7320665296953219E+00 | 1.0029193982214670E+01 | 8.1961163123530945E+00 |
| C | 1.1757699832309134E+01 | 8.9177854832153791E+00 | 7.1446946390908161E+00 |
| H | 1.3521653890696664E+01 | 8.6396602341736664E+00 | 8.3369287707519444E+00 |
| H | 9.7249072592013555E+00 | 8.9640677278952055E+00 | 6.2437645137789044E+00 |
| H | 1.2312671727471855E+01 | 8.4881857929554005E+00 | 6.2848674435492118E+00 |
| C | 9.5178968958342054E+00 | 9.3062413048520121E+00 | 1.1618066541888986E+01 |
| C | 8.6345180464317401E+00 | 1.0088205823300319E+01 | 1.2378097278763251E+01 |
| H | 9.0361649905425754E+00 | 8.7634898620910509E+00 | 1.0807192852424649E+01 |
| H | 7.6253996477458550E+00 | 1.0279082438018500E+01 | 1.2001594335176646E+01 |
| C | 8.9748489411947343E+00 | 1.0472109089069091E+01 | 1.3737956856743601E+01 |
| O | 8.1851436012269456E+00 | 1.1204552689486672E+01 | 1.4405377229818278E+01 |
| C | 1.0267573830509374E+01 | 9.9247825169520976E+00 | 1.4334676164957518E+01 |
| H | 1.0708605239104314E+01 | 1.0756635127385957E+01 | 1.4945189282912748E+01 |
| C | 1.0669506536778112E+01 | 8.5900233759111675E+00 | 1.2368895915865261E+01 |
| C | 1.1346620688475394E+01 | 9.5252247681619302E+00 | 1.3326173234301276E+01 |
| H | 1.0018749507844973E+01 | 9.0805206022799183E+00 | 1.4967104819461056E+01 |
| H | 1.1667895517960154E+01 | 1.0486774042049836E+01 | 1.2856644884127515E+01 |
| H | 1.2236217749597898E+01 | 9.1241262594595476E+00 | 1.3848661231388828E+01 |
| H | 1.0243161393347194E+01 | 7.7247630736246906E+00 | 1.2809343839254591E+01 |
| H | 1.1406392847961978E+01 | 8.2131374603819474E+00 | 1.1615473373403230E+01 |
| H | 1.9075483641773676E+01 | 7.5153758090887353E+00 | 1.3552886667824760E+01 |
| O | 9.6526070427420372E+00 | 1.4049155585543682E+01 | 1.6247565105051539E+01 |
| H | 9.8027437176391796E+00 | 1.3237298450613293E+01 | 1.6741332037243929E+01 |
| H | 8.6915941673026023E+00 | 1.4005268990805106E+01 | 1.6059288125946075E+01 |
| O | 1.9631837657987717E+01 | 7.6918791016701604E+00 | 1.4297001920217475E+01 |
| H | 1.9513816177026342E+01 | 8.6300989861763622E+00 | 1.4527390328261871E+01 |
| O | 6.1279817166139310E+00 | 1.0597064963682712E+01 | 1.9786735422542780E+01 |
| B | 5.6386399271949790E+00 | 1.0074899922929308E+01 | 1.6567612825302124E+01 |
| O | 2.9388382880043151E+00 | 9.2865893260688956E+00 | 1.4915138066770576E+01 |
| O | 5.5746775356511353E+00 | 1.0146229649194241E+01 | 1.5172483500209417E+01 |
| H | 5.3053304392697420E+00 | 1.0854093509637988E+01 | 2.0183230997471853E+01 |
| H | 6.3868305968184247E+00 | 9.7635068303327817E+00 | 2.0280462526464820E+01 |
| O | 2.3704008423118097E+00 | 6.6964446573572491E+00 | 1.3886966021570775E+01 |
| O | 6.6787456722781400E+00 | 1.0566345772542258E+01 | 1.7258964388244557E+01 |
| O | 4.5354827568305627E+00 | 9.4052535867456761E+00 | 1.7177469368630430E+01 |
| H | 1.4423772674655186E+00 | 6.8124221776090632E+00 | 1.4134584205525590E+01 |
| H | 6.4191385213839549E+00 | 1.0661740290668096E+01 | 1.8309707514447449E+01 |
| H | 3.8730711357719438E+00 | 9.2689146995397955E+00 | 1.6412435987325058E+01 |
| H | 2.6965158450210254E+00 | 6.2324179166453986E+00 | 1.4714608284931941E+01 |
| H | 2.7379556251235768E+00 | 8.5544396735935742E+00 | 1.4301594809926968E+01 |
| H | 6.3866189596456424E+00 | 1.0571845469671864E+01 | 1.4811374828374023E+01 |
| C | 3.8704487166069712E+00 | 9.4304661504762546E+00 | 1.4611973559225770E+01 |
| H | 6.8601805912845597E+00 | 6.2401250071358643E+00 | 1.6593254803700077E+01 |
| H | 6.6682854961601059E+00 | 7.8864402302958592E+00 | 1.4016224568400688E+01 |
| H | 7.3896664136338330E+00 | 8.3061319501223032E+00 | 1.5555326003979937E+01 |
| O | 1.7302788947881783E+01 | 9.2903444145055669E+00 | 4.3775531950618500E+00 |
| O | 1.7634956653833683E+01 | 6.7257688417119024E+00 | 5.6465932202067677E+00 |
| C | 1.6897554101790067E+01 | 7.8102139586510493E+00 | 6.2604479702063074E+00 |
| C | 1.8648989600833328E+01 | 7.2385219657402482E+00 | 4.7384297538328104E+00 |
| C | 1.8179836453814374E+01 | 8.3471923279783127E+00 | 3.8133719962054342E+00 |
| C | 1.6307788625877009E+01 | 8.8368588630583513E+00 | 5.3197290179147272E+00 |
| H | 1.9095741330137194E+01 | 8.8518375742814115E+00 | 3.4739280604433924E+00 |
| H | 1.7699875936559366E+01 | 8.0124403510287312E+00 | 2.8974867665571722E+00 |
| H | 1.9002522034336366E+01 | 6.4438759473435043E+00 | 4.1040258176976465E+00 |
| H | 1.9490826716004751E+01 | 7.7166509638711247E+00 | 5.3120754759933462E+00 |
| H | 1.6067881672220906E+01 | 9.8295637791548689E+00 | 5.8243872309697187E+00 |
| H | 1.5430727959082221E+01 | 8.4860537107468001E+00 | 4.8050070486742609E+00 |
| H | 1.7586776626693055E+01 | 8.1183691767671338E+00 | 7.0612140206684053E+00 |
| H | 1.6169269900592319E+01 | 7.2781057811494980E+00 | 6.8743606270754913E+00 |
| O | 3.3888756574246020E+00 | 2.0983384895691739E+01 | 1.9572843216985291E+01 |
| O | 3.9416411437577414E+00 | 1.8742482689348904E+01 | 1.7938524780976728E+01 |
| C | 2.6483984863288219E+00 | 1.9361605590228358E+01 | 1.7999031067165696E+01 |
| C | 4.5626615007039941E+00 | 1.8927842715127866E+01 | 1.9197115153910151E+01 |
| C | 4.6721117325578243E+00 | 2.0409573824604337E+01 | 1.9575578759163744E+01 |

|   |                        |                        |                        |
|---|------------------------|------------------------|------------------------|
| C | 2.7665457096087014E+00 | 2.0815566836428133E+01 | 1.8319370502583375E+01 |
| H | 4.9871645375195914E+00 | 2.0433971573913578E+01 | 2.0607249947789249E+01 |
| H | 5.4139700476361154E+00 | 2.0947883779798644E+01 | 1.8905178877460983E+01 |
| H | 5.5870634417337994E+00 | 1.8427861321931886E+01 | 1.9194529530308639E+01 |
| H | 3.9265725999203576E+00 | 1.8438510942600949E+01 | 1.9957463827676598E+01 |
| H | 1.7653462219509313E+00 | 2.1282013203411562E+01 | 1.8422106201869731E+01 |
| H | 3.2208260550480223E+00 | 2.1370833114856378E+01 | 1.7503666412031329E+01 |
| H | 2.0387421495284981E+00 | 1.8879023113012586E+01 | 1.8792549230132067E+01 |
| H | 2.0961352671617393E+00 | 1.9118889732422080E+01 | 1.7090065345772206E+01 |
| O | 4.5436416293303186E+00 | 2.0173548479546433E+01 | 8.3816905716427925E+00 |
| O | 5.4380592470361755E+00 | 2.2934092129074468E+01 | 8.7595122646859025E+00 |
| C | 4.9731485448691570E+00 | 2.2068906248978646E+01 | 9.8898010781131322E+00 |
| C | 4.9262047595894298E+00 | 2.2414792332617900E+01 | 7.4492458340629106E+00 |
| C | 5.1939832462170763E+00 | 2.0902958922145370E+01 | 7.3449849246076759E+00 |
| C | 5.1783311537958054E+00 | 2.0626317946214865E+01 | 9.5824022444076409E+00 |
| H | 4.7268248088896163E+00 | 2.0466097280240060E+01 | 6.4294882643017806E+00 |
| H | 6.2713071944563890E+00 | 2.0689031971401132E+01 | 7.3582186347940812E+00 |
| H | 5.3786957569052456E+00 | 2.3070378355166582E+01 | 6.6850211592080386E+00 |
| H | 3.8397340103143343E+00 | 2.2541087905397944E+01 | 7.3160554465900391E+00 |
| H | 4.9473854205480317E+00 | 1.9899602395068417E+01 | 1.0415347851820151E+01 |
| H | 6.2919708710254998E+00 | 2.0507902251235997E+01 | 9.4718404799678364E+00 |
| H | 3.8943006847337265E+00 | 2.2414810462587553E+01 | 1.0142491082210325E+01 |
| H | 5.5427028038383455E+00 | 2.2250365896843412E+01 | 1.0776176582448738E+01 |
| O | 1.1844611906552252E+01 | 1.7673087334191585E+01 | 8.5356781244557745E+00 |
| O | 1.4398010224408571E+01 | 1.8289836804204047E+01 | 9.5337567766576647E+00 |
| C | 1.3615208975832982E+01 | 1.9300697873404257E+01 | 8.8839449077631532E+00 |
| C | 1.4097576019334189E+01 | 1.6938402929813115E+01 | 9.1100151384111943E+00 |
| C | 1.2588265303812035E+01 | 1.6666218948827552E+01 | 9.1785436827887992E+00 |
| C | 1.2117332742273177E+01 | 1.8991037691261234E+01 | 9.0909609853349949E+00 |
| H | 1.2406719646556708E+01 | 1.5732912456396283E+01 | 8.6294429308345766E+00 |
| H | 1.2242958311291639E+01 | 1.6470592049938720E+01 | 1.0172757757372862E+01 |
| H | 1.4723222314350119E+01 | 1.6236913868398595E+01 | 9.6843709070484536E+00 |
| H | 1.4486549124167270E+01 | 1.6789126627814930E+01 | 8.1130732219108062E+00 |
| H | 1.1405721983861772E+01 | 1.9654050058209815E+01 | 8.6420509073675795E+00 |
| H | 1.1989528020895346E+01 | 1.9013733696933869E+01 | 1.0192985448399247E+01 |
| H | 1.3790263470988837E+01 | 1.9296141611832379E+01 | 7.8316850352978795E+00 |
| H | 1.3980254857937942E+01 | 2.0260581293728933E+01 | 9.2960919080883766E+00 |
| O | 2.4777375660606880E+00 | 1.7871583656873160E+01 | 5.3372421718524050E+00 |
| O | 3.9514070892503561E+00 | 1.9201340124726553E+01 | 3.2823384106390403E+00 |
| C | 2.7806684616995869E+00 | 1.9800122278287354E+01 | 3.8053831383656944E+00 |
| C | 3.8058580088787259E+00 | 1.7760294065219664E+01 | 3.2260137398685460E+00 |
| C | 3.5904990472948755E+00 | 1.7261089467963398E+01 | 4.6829608718330675E+00 |
| C | 2.4713965308424983E+00 | 1.9264858915877472E+01 | 5.2323928374805799E+00 |
| H | 3.3723489130535800E+00 | 1.6154371283260183E+01 | 4.7890766406786742E+00 |
| H | 4.5028819625687584E+00 | 1.7472912288643546E+01 | 5.2418812135598998E+00 |
| H | 4.7113488071740059E+00 | 1.7348730192832701E+01 | 2.7354957965808437E+00 |
| H | 2.9709224762582265E+00 | 1.7547601182905996E+01 | 2.5932859428981847E+00 |
| H | 1.4944909795258763E+00 | 1.9650840405026418E+01 | 5.5574490961515659E+00 |
| H | 3.2012255798615832E+00 | 1.9628915208424608E+01 | 5.9167484037287812E+00 |
| H | 1.8924135357378715E+00 | 1.9580190987890770E+01 | 3.2121798114144307E+00 |
| H | 3.0220735060746602E+00 | 2.0840816285383170E+01 | 3.8463187053428536E+00 |
| O | 1.6048907844046582E+01 | 2.0761999247955418E+00 | 2.0240191900039246E+01 |
| O | 1.3691060733543829E+01 | 1.7873633921726642E+00 | 1.8885434198685331E+01 |
| C | 1.3691341538640382E+01 | 1.7391869011436476E+00 | 2.0319280242685625E+01 |
| C | 1.4924026449173958E+01 | 1.4397395832241358E+00 | 1.8318121466452922E+01 |
| C | 1.5914478912573642E+01 | 2.3664387054729406E+00 | 1.8833948696208559E+01 |
| C | 1.4817903572712439E+01 | 2.6528060381388143E+00 | 2.0835635119257791E+01 |
| H | 1.6893133858240539E+01 | 2.2926384692880686E+00 | 1.8392991574118756E+01 |
| H | 1.5629734341390304E+01 | 3.4163262898861690E+00 | 1.8721222064265447E+01 |
| H | 1.4767566537471733E+01 | 1.4979779251385663E+00 | 1.7187316112372752E+01 |
| H | 1.5282628502876614E+01 | 3.9370203584323210E-01 | 1.8565371124185273E+01 |
| H | 1.4895601108215114E+01 | 2.5325356222370039E+00 | 1.1922884667303389E+01 |
| H | 1.4683158447597943E+01 | 3.7084763951631756E+00 | 2.0569585931393700E+01 |
| H | 1.3861068625664766E+01 | 6.8902338767395699E-01 | 2.0578554570030906E+01 |
| H | 1.2639103948003969E+01 | 1.9846794382860136E+00 | 2.0646333396990290E+01 |
| O | 1.4965645595517609E+01 | 2.7645750247208363E+00 | 2.165625853879085E+00  |
| O | 1.5323696817444100E+01 | 5.5814901615143082E+00 | 8.5440033405684357E+00 |
| C | 1.3959732285096925E+01 | 4.9565874383609918E+00 | 8.5576202536816215E+00 |
| C | 1.6297028701071717E+01 | 4.6074755101267186E+00 | 8.2626244143748568E+00 |
| C | 1.6304095563386522E+01 | 3.2824745661593093E+00 | 9.1285463911292943E+00 |
| C | 1.3928718713798238E+01 | 3.7380784800348477E+00 | 9.5704999345266302E+00 |
| H | 1.6927227192131760E+01 | 2.5554668718568676E+00 | 8.6160607743987434E+00 |
| H | 1.6583040743334873E+01 | 3.5106509913374819E+00 | 1.0112559409529696E+01 |
| H | 1.7145630853355037E+01 | 5.2204470555023059E+00 | 8.3939877248422867E+00 |

H 1.6202649270166280E+01 4.3057999625826167E+00 7.2434963458242256E+00  
H 1.2977393229551080E+01 3.1737797039411491E+00 9.5662440575987979E+00  
H 1.4073953532553709E+01 4.1064337068585521E+00 1.0605457595776809E+01  
H 1.3718436950016065E+01 4.5921521899932971E+00 7.5563406525897250E+00  
H 1.3331981955435314E+01 5.6966193161011951E+00 8.9661488818391319E+00  
O 3.7425962149355412E+00 1.7314442259374331E+01 1.0875273886404720E+01  
O 3.8256565970883409E+00 1.6003328509953473E+01 8.3012163549298617E+00  
C 2.7535311954160298E+00 1.6968667198245111E+01 8.655216472723160E+00  
C 5.0133276533611921E+00 1.6314938477608880E+01 9.1273454540108432E+00  
C 4.6256847147004416E+00 1.6289776071538384E+01 1.0559215171630415E+01  
C 2.5504405658674183E+00 1.7141952180843848E+01 1.0166903939748437E+01  
H 4.2339705117840207E+00 1.5236943232623307E+01 1.0803307475835760E+01  
H 5.4867495743092380E+00 1.6492311869174610E+01 1.1270535270158380E+01  
H 5.4781306143588049E+00 1.7292851864497905E+01 8.7621444004857434E+00  
H 5.7292421174688721E+00 1.5504433252587308E+01 8.8155290085798672E+00  
H 1.9250006600452021E+00 1.6429152918266883E+01 1.0661353397961737E+01  
H 1.9803364270002928E+00 1.8112397837831796E+01 1.0260443101708466E+01  
H 1.8401504616023561E+00 1.6564709475805717E+01 8.2144786980351441E+00  
H 3.0079608194048766E+00 1.7960737314709561E+01 8.3410132463720501E+00  
O 4.3346700942285077E+00 7.5727760669112172E+00 9.2577797982395360E+00  
O 6.4037444971638608E+00 6.7128772971902615E+00 1.1000863848559991E+01  
C 5.1786869422667010E+00 7.2147902588861497E+00 1.1524123538253692E+01  
C 6.7504814195014289E+00 7.4298997125560042E+00 9.7444109944419175E+00  
C 5.6408530610340559E+00 7.2272063866115177E+00 8.7406895792999162E+00  
C 4.0847788783306600E+00 6.8974412931931246E+00 1.0547866334529392E+01  
H 5.8239715263571812E+00 7.8326095014077124E+00 7.8065029000412478E+00  
H 5.7392493872486332E+00 6.1817194021602120E+00 8.4489026045518294E+00  
H 7.5802926104334460E+00 6.9068139097785064E+00 9.3298042541297868E+00  
H 6.9749195405126558E+00 8.5153962288025351E+00 9.9806926093402488E+00  
H 3.0724573215157198E+00 7.1614852621722722E+00 1.0834452636008843E+01  
H 4.1668537350354162E+00 5.7632763989125877E+00 1.0401052729482785E+01  
H 5.3025045061559180E+00 8.2398391464371681E+00 1.1832716608657773E+01  
H 5.1431581311534984E+00 6.7309093279841683E+00 1.2491900634635074E+01  
O 1.2159940138172534E+01 1.0397407618308439E+01 1.9727991330818035E+01  
O 1.1064841224549090E+01 1.2375952275305766E+01 1.7872867724867834E+01  
C 1.1022563853552807E+01 1.0886098471192822E+01 1.7602213205685459E+01  
C 1.2164017981962289E+01 1.2739850284537404E+01 1.8791640326519801E+01  
C 1.2197204256988803E+01 1.1807070856412473E+01 2.0069281606965312E+01  
C 1.1109756649824481E+01 1.0089850217608822E+01 1.8873963574349549E+01  
H 1.3113139022065353E+01 1.1936683053089945E+01 2.0638396369582953E+01  
H 1.1470632005170946E+01 1.2013366045255971E+01 2.0822478900457131E+01  
H 1.1904059896840971E+01 1.3827394275366409E+01 1.8899137910065985E+01  
H 1.3096383174911344E+01 1.2599950086803368E+01 1.8310314012680152E+01  
H 1.1355514062543779E+01 9.0349250859137822E+00 1.8641944255536067E+01  
H 1.0153416113830087E+01 1.0193556394208755E+01 1.9430330346397824E+01  
H 1.1839267185519645E+01 1.0628660738593567E+01 1.6870811880838612E+01  
H 1.0041645547042819E+01 1.0664997728717561E+01 1.7191550642466183E+01  
O 1.9086015964603451E+01 1.3979708349774778E+01 1.4474217012728456E+01  
O 1.8580440142069051E+01 1.1203157910090503E+01 1.4089704502849406E+01  
C 1.7518798427698748E+01 1.2133698659513364E+01 1.4199247071719418E+01  
C 1.9817588362560037E+01 1.1628288040290792E+01 1.4679767484039411E+01  
C 2.0186946949412054E+01 1.3036679711412201E+01 1.4262195759267819E+01  
C 1.7907680455116605E+01 1.3523683462185327E+01 1.3794683169749264E+01  
H 2.0968196081306566E+01 1.3488499736181932E+01 1.4811993708381808E+01  
H 2.0480629879257741E+01 1.2979090078433750E+01 1.3198844169540317E+01  
H 2.0576034553856509E+01 1.0923348929544714E+01 1.4368503240233977E+01  
H 1.9830927707776599E+01 1.1679914873768389E+01 1.5775376049776215E+01  
H 1.7115860986399461E+01 1.4281753713591515E+01 1.3906937583689576E+01  
H 1.8085020276572898E+01 1.3470528153785612E+01 1.2721454780740547E+01  
H 1.7051436918265342E+01 1.2098373200937992E+01 1.5195849478254800E+01  
H 1.6794660483436317E+01 1.1665092110832655E+01 1.3482215052473432E+01  
O 2.6616766824799765E+00 1.3347275732937097E+01 5.5668879763551207E+00  
O 5.0019288387120060E+00 1.2219060280615073E+01 4.6238854062978190E+00  
C 5.0536350109244585E+00 1.3061543063955003E+01 5.7956146454035053E+00  
C 4.1522534766927084E+00 1.2783257331550839E+01 3.6813304415360704E+00  
C 2.6895438861925354E+00 1.2939507556719235E+01 4.1764236178534402E+00  
C 3.6849727863890669E+00 1.2940224199691363E+01 6.4882835159846648E+00  
H 2.1245669051409104E+00 1.3795931480011850E+01 3.7052143920482270E+00  
H 2.0955854071205957E+00 1.1988206599254761E+01 3.9216221023469169E+00  
H 4.1797279544400521E+00 1.2124016841081266E+01 2.7771157181363435E+00  
H 4.5891907087027910E+00 1.3848685609827955E+01 3.4467444285116327E+00  
H 3.6215821135034494E+00 1.3688562112374099E+01 7.2963112586204577E+00  
H 3.4502603618270773E+00 1.1893148198598606E+01 6.7885398044169856E+00  
H 5.2471660569084300E+00 1.4150907891639555E+01 5.5953731432474916E+00



|   |                        |                        |                        |
|---|------------------------|------------------------|------------------------|
| H | 5.8956769964744220E+00 | 1.2739493086966087E+01 | 6.4543440556796838E+00 |
| O | 1.8257335490917491E+01 | 1.6089469845598721E+01 | 1.2051253173999955E+01 |
| O | 1.9056916920680770E+01 | 1.5510886000575352E+01 | 9.3462181461223235E+00 |
| C | 1.7668284737576172E+01 | 1.5808444796804071E+01 | 9.7343789209906078E+00 |
| C | 1.9770051701398877E+01 | 1.4869600182443870E+01 | 1.0411684667875848E+01 |
| C | 1.9632508189797065E+01 | 1.5695333966325826E+01 | 1.1761733053384564E+01 |
| C | 1.7677034056826553E+01 | 1.6728784775410521E+01 | 1.0910994367674764E+01 |
| H | 1.9903011923323302E+01 | 1.5169450195788677E+01 | 1.2695949816859054E+01 |
| H | 2.0327949730470024E+01 | 1.6556088185889784E+01 | 1.1651432712981009E+01 |
| H | 2.0794614616620702E+01 | 1.4717230038560274E+01 | 1.0114379150611093E+01 |
| H | 1.9428294563948945E+01 | 1.3844911232692603E+01 | 1.0533430613494568E+01 |
| H | 1.6687534728438493E+01 | 1.6973876101566130E+01 | 1.1170124227859262E+01 |
| H | 1.8261978033274737E+01 | 1.7637653460808249E+01 | 1.0698429034750601E+01 |
| H | 1.7090066293237626E+01 | 1.4944476996086282E+01 | 1.0010943322501840E+01 |
| H | 1.7205466861299850E+01 | 1.6342924656233045E+01 | 8.8978366634881212E+00 |
| O | 3.8837066243801739E+00 | 1.4809234208548176E+01 | 1.6642912507928891E+01 |
| O | 6.6214592834780694E+00 | 1.4772794105195249E+01 | 1.5687824108114475E+01 |
| C | 6.0166529317065720E+00 | 1.6057709391739607E+01 | 1.6116413128902199E+01 |
| C | 5.5548890324404052E+00 | 1.3976246338848714E+01 | 1.5068618501835431E+01 |
| C | 4.4247435846888941E+00 | 1.3653041048659286E+01 | 1.6045049953570281E+01 |
| C | 4.9637345801005841E+00 | 1.5710310550936514E+01 | 1.7138722624226173E+01 |
| H | 3.5386509831835653E+00 | 1.3016977106178631E+01 | 1.5669744030328497E+01 |
| H | 4.9240394710985242E+00 | 1.3049994702253956E+01 | 1.6849316799252708E+01 |
| H | 6.0234835171372225E+00 | 1.3069496051660112E+01 | 1.4677699050860650E+01 |
| H | 5.2050624225121291E+00 | 1.4513349569599900E+01 | 1.4176958229700473E+01 |
| H | 4.5384923580232703E+00 | 1.6670043114348431E+01 | 1.7368068936031754E+01 |
| H | 5.5172930969258491E+00 | 1.5179156389361449E+01 | 1.7919216157950522E+01 |
| H | 5.6167720718355696E+00 | 1.6661372843127047E+01 | 1.5281672492316146E+01 |
| H | 6.8081837980514424E+00 | 1.6760719736156489E+01 | 1.6479258964382520E+01 |
| O | 1.0727884379558532E+01 | 4.7987180172905894E+00 | 9.3014063393503346E+00 |
| O | 8.6179242690340558E+00 | 5.0641484946633204E+00 | 7.3839209872918623E+00 |
| C | 8.6789465470786773E+00 | 3.9547575097214369E+00 | 8.2471071307691339E+00 |
| C | 9.8772787093205299E+00 | 5.7171558365939825E+00 | 7.2377237744491874E+00 |
| C | 1.0500474908708833E+01 | 5.9893273463055854E+00 | 8.5597473635907413E+00 |
| C | 9.4456532732818186E+00 | 4.2832414902054632E+00 | 9.5490160374880979E+00 |
| H | 1.1417550358583686E+01 | 6.6121845066299834E+00 | 8.4052306720182184E+00 |
| H | 9.7942432033827238E+00 | 6.6821849608671409E+00 | 9.1141825807869186E+00 |
| H | 9.6047487436634587E+00 | 6.6960444189656192E+00 | 6.7798091389906618E+00 |
| H | 1.0556912172053597E+01 | 5.1203849569943847E+00 | 6.6329477622840276E+00 |
| H | 9.5550318485665180E+00 | 3.3359587825772676E+00 | 1.0045445326917216E+01 |
| H | 8.8699153103868280E+00 | 4.9180002943126651E+00 | 1.0236428368940160E+01 |
| H | 9.1983436179991145E+00 | 3.0794100679332943E+00 | 7.7868429441575824E+00 |
| H | 7.6294312507727016E+00 | 3.7835210614333246E+00 | 8.4590089898001484E+00 |
| O | 3.3840995395490512E+00 | 1.0626709586824875E+01 | 2.1121993713205708E+01 |
| O | 8.7794570137017247E-01 | 1.0109887804442092E+01 | 2.0209863705412360E+01 |
| C | 1.1489590127564584E+00 | 1.1364587912501680E+01 | 2.0799394304223469E+01 |
| C | 1.6599813722490280E+00 | 9.0674277235163014E+00 | 2.0766996962086232E+01 |
| C | 3.1494412521232787E+00 | 9.3254687033838639E+00 | 2.0577260360628230E+01 |
| C | 2.5472298307455490E+00 | 1.1676328415349651E+01 | 2.0556589465087612E+01 |
| H | 3.7470519853132522E+00 | 8.7176053521816623E+00 | 2.1240897610503332E+01 |
| H | 3.4140356708704198E+00 | 9.2988141811258753E+00 | 1.9452935131019238E+01 |
| H | 1.3048498645009317E+00 | 8.0753415864411338E+00 | 2.0383166397666056E+01 |
| H | 1.443596226071727E+00  | 9.0620019917843155E+00 | 2.1825423016845043E+01 |
| H | 2.9562870110914283E+00 | 1.2591806778552524E+01 | 2.0950370719605708E+01 |
| H | 2.7699097300382212E+00 | 1.1661830320381055E+01 | 1.9511212277056561E+01 |
| H | 8.3726041081805003E-01 | 1.1415571295553706E+01 | 2.1856925036766434E+01 |
| H | 5.3959837337539307E-01 | 1.2123857476985819E+01 | 2.0300407127031072E+01 |
| O | 9.6246499449790495E+00 | 1.9527814491534105E+01 | 3.7465183176895511E+00 |
| O | 7.9368694050280428E+00 | 1.9163354376352988E+01 | 1.3926846015094538E+00 |
| C | 7.4117603574093023E+00 | 1.9260641895360607E+01 | 2.6956366901851108E+00 |
| C | 9.2889468196560916E+00 | 1.8516608665510983E+01 | 1.4351659005807047E+00 |
| C | 1.0201998610095483E+01 | 1.9296643086431718E+01 | 2.4104820682468144E+00 |
| C | 8.3071319120630811E+00 | 2.0207783621485728E+01 | 3.5311195423178376E+00 |
| H | 1.1132722602911883E+01 | 1.8716080252839006E+01 | 2.5484313460025874E+00 |
| H | 1.0365405495729538E+01 | 2.0216662385120301E+01 | 1.8373631095346983E+00 |
| H | 9.6773735860496135E+00 | 1.8740451446219392E+01 | 4.6217628946691414E-01 |
| H | 9.2129492290211701E+00 | 1.7423810395676615E+01 | 1.5599250220389067E+00 |
| H | 7.8634312537515845E+00 | 2.0495740050740981E+01 | 4.4514329512414674E+00 |
| H | 8.5227488216084630E+00 | 2.1118301281093700E+01 | 2.9545995463352601E+00 |
| H | 7.2282148189606552E+00 | 1.8304035778604582E+01 | 3.2472103401613008E+00 |
| H | 6.4577674407147097E+00 | 1.9757383690959109E+01 | 2.5665222667185899E+00 |
| O | 1.4334614992717766E+01 | 1.8755585593886035E+01 | 5.2921872036483393E+00 |
| O | 1.5982184596385446E+01 | 1.8189548900654454E+01 | 3.0043076612058166E+00 |
| C | 1.6471312136720314E+01 | 1.8136318591633486E+01 | 4.3565799082842229E+00 |

|   |                        |                        |                        |
|---|------------------------|------------------------|------------------------|
| C | 1.4814071346712584E+01 | 1.9100558990724554E+01 | 2.9298984153947272E+00 |
| C | 1.3802371076190255E+01 | 1.8640879490961865E+01 | 3.9770584333259662E+00 |
| C | 1.5413105813910292E+01 | 1.7799327900122567E+01 | 5.4341680150903695E+00 |
| H | 1.2989560704284560E+01 | 1.9366777219239456E+01 | 3.9218414697895634E+00 |
| H | 1.3463325795362564E+01 | 1.7621483416693199E+01 | 3.8584239057446958E+00 |
| H | 1.4350528929773223E+01 | 1.9013213054731178E+01 | 1.9881579392048740E+00 |
| H | 1.5182349335393688E+01 | 2.0077874808048101E+01 | 3.2582546611198837E+00 |
| H | 1.5866049065061173E+01 | 1.7861925569397869E+01 | 6.4043910817824425E+00 |
| H | 1.4927418963615915E+01 | 1.6772156041053094E+01 | 5.4714639607904738E+00 |
| H | 1.6887855326546411E+01 | 1.9144849014607466E+01 | 4.6222927520775805E+00 |
| H | 1.7230129601425656E+01 | 1.7271932880375157E+01 | 4.3403669033704446E+00 |
| O | 1.1017368872076560E+01 | 2.4098020176036221E+00 | 1.5496005278458149E+01 |
| O | 1.1014775854315534E+01 | 1.5747357081329234E+00 | 1.2594392525043833E+01 |
| C | 1.2123579244390449E+01 | 2.3797464435419378E+00 | 1.3220156431859833E+01 |
| C | 9.8322960995704971E+00 | 1.8573651662931212E+00 | 1.3354302464536756E+01 |
| C | 9.9489237997843318E+00 | 1.6062429375684684E+00 | 1.4889893611055339E+01 |
| C | 1.2189227319245971E+01 | 2.2965195821352520E+00 | 1.4721162511504922E+01 |
| H | 9.0596906753906765E+00 | 2.0104878667442354E+00 | 1.5361294901543088E+01 |
| H | 1.0078589492989172E+01 | 5.5681575402843175E-01 | 1.5015546873545960E+01 |
| H | 8.9879223522553353E+00 | 1.3177141239340249E+00 | 1.2960044230294576E+01 |
| H | 9.6327799901206745E+00 | 2.9268491651081621E+00 | 1.3173566218929937E+01 |
| H | 1.2934139498959794E+01 | 3.0860548315713858E+00 | 1.4966331648748927E+01 |
| H | 1.2773777755258054E+01 | 1.3982673885545585E+00 | 1.4970602667724270E+01 |
| H | 1.1935156215391585E+01 | 3.4127176690073222E+00 | 1.2908848387906778E+01 |
| H | 1.3036476427856480E+01 | 1.9804826400143862E+00 | 1.2733467431622648E+01 |
| O | 6.9062731745252819E+00 | 2.0782898052679972E+01 | 1.2770422977844685E+01 |
| O | 6.669690339536124E+00  | 1.8800734089919100E+01 | 1.4850712288265120E+01 |
| C | 6.4131470226176752E+00 | 2.0223535073407806E+01 | 1.5034108613569570E+01 |
| C | 7.5320446086028525E+00 | 1.8630503696315348E+01 | 1.3756115695513738E+01 |
| C | 7.1951872548285998E+00 | 1.9412733177593005E+01 | 1.2498159529935579E+01 |
| C | 5.8730167987923441E+00 | 2.0815475209958077E+01 | 1.3758080032135936E+01 |
| H | 8.0806229783828680E+00 | 1.9221878169071907E+01 | 1.1848989723769000E+01 |
| H | 6.2593617144622531E+00 | 1.9059309722746704E+01 | 1.1929546118841921E+01 |
| H | 7.5822088187692840E+00 | 1.7472534667288862E+01 | 1.3579454173364221E+01 |
| H | 8.5709027917163141E+00 | 1.8887959383593522E+01 | 1.3971968856364583E+01 |
| H | 5.5783872012870885E+00 | 2.1884666594551113E+01 | 1.3902253659544433E+01 |
| H | 4.9782473226975847E+00 | 2.0253655017237108E+01 | 1.3353663866021369E+01 |
| H | 7.3721030637877902E+00 | 2.0583236361942028E+01 | 1.5330996631379504E+01 |
| H | 5.6850834202367020E+00 | 2.0358575454203919E+01 | 1.5884011228957144E+01 |
| O | 1.1629165202201520E+01 | 2.2257953125004196E+01 | 6.7038511352618118E+00 |
| O | 1.3114667733242714E+01 | 2.1687956176471538E+01 | 4.1931225656660214E+00 |
| C | 1.3762283492639440E+01 | 2.2152404469558057E+01 | 5.3916343149276598E+00 |
| C | 1.1752360632946694E+01 | 2.2139018159507536E+01 | 4.2145941441182782E+00 |
| C | 1.0972518719224214E+01 | 2.1769397997448880E+01 | 5.4888887307510954E+00 |
| C | 1.2982896960343632E+01 | 2.1781790984139295E+01 | 6.6431096298205565E+00 |
| H | 9.9238028188746572E+00 | 2.2078567915975132E+01 | 5.5286398376717161E+00 |
| H | 1.0837856863462576E+01 | 2.0662769893508845E+01 | 5.5712257061756034E+00 |
| H | 1.1233791581932621E+01 | 2.1747542587248468E+01 | 3.4003323336564852E+00 |
| H | 1.1696234972647051E+01 | 2.3197874564586261E+01 | 4.1473148162779472E+00 |
| H | 1.3627006644898122E+01 | 2.2158874312875028E+01 | 7.4580903887426899E+00 |
| H | 1.2915794982015433E+01 | 2.0731852845157565E+01 | 6.7437666439247224E+00 |
| H | 1.3846905790629785E+01 | 2.3248759947138005E+01 | 5.4074443320070049E+00 |
| H | 1.4673279062267177E+01 | 2.1568818610341225E+01 | 5.4565478426639347E+00 |
| O | 2.1656353190585769E+01 | 1.0740753048040473E+01 | 8.3576932812766174E+00 |
| O | 1.8866678434406747E+01 | 1.0868645183911260E+01 | 9.3604108750047335E+00 |
| C | 1.9721851564613612E+01 | 9.7167133394028298E+00 | 9.5742922144457996E+00 |
| C | 1.9232278165108227E+01 | 1.1463074964945447E+01 | 8.1295296627206266E+00 |
| C | 2.0722173784738747E+01 | 1.1840415613313805E+01 | 8.1753053194808381E+00 |
| C | 2.1206505160392357E+01 | 9.9935931988433051E+00 | 9.5440252187806625E+00 |
| H | 2.0967602085902634E+01 | 1.2278022230221284E+01 | 7.1981963632365433E+00 |
| H | 2.0946457160266728E+01 | 1.2438154430047895E+01 | 9.0167743036690844E+00 |
| H | 1.8737421483434481E+01 | 1.2444159373283304E+01 | 8.0486122395871593E+00 |
| H | 1.8817146007811228E+01 | 1.0903433724762271E+01 | 7.2800079237346109E+00 |
| H | 2.1766914510151320E+01 | 9.0896580186397564E+00 | 9.5521002993498971E+00 |
| H | 2.1445186397766246E+01 | 1.0619697929275381E+01 | 1.0421906489931985E+01 |
| H | 1.9506442130022947E+01 | 8.8888973796551962E+00 | 8.8757460974616702E+00 |
| H | 1.9498623211760396E+01 | 9.3056369948921738E+00 | 1.0600906443586075E+01 |
| O | 1.5377361397755386E+01 | 1.1964864656104526E+01 | 2.1036650498562945E+01 |
| O | 1.6823508413133123E+01 | 9.6220904009818362E+00 | 2.1376969046792439E+01 |
| C | 1.6825938842738655E+01 | 1.0185598384683761E+01 | 2.0032716191369321E+01 |
| C | 1.5495343435151483E+01 | 9.7626164697505793E+00 | 2.1920192532354655E+01 |
| C | 1.5375648871339603E+01 | 1.1260727844514584E+01 | 2.2311129930192049E+01 |
| C | 1.6595803355118459E+01 | 1.1653426801383054E+01 | 2.0238365363369724E+01 |
| H | 1.4407974445381692E+01 | 1.1497098190393139E+01 | 2.2790215292862406E+01 |

|   |                         |                         |                        |
|---|-------------------------|-------------------------|------------------------|
| H | 1.6189086590683161E+01  | 1.1582977916281150E+01  | 2.3017659064480771E+01 |
| H | 1.5385252960601354E+01  | 9.0316264555363652E+00  | 2.2704230746064873E+01 |
| H | 1.4686889922243209E+01  | 9.4828472243627910E+00  | 2.1221393017294819E+01 |
| H | 1.6441815125411523E+01  | 1.2172043157163289E+01  | 1.9305467300299252E+01 |
| H | 1.7470286619012487E+01  | 1.2121683461616678E+01  | 2.0775360158445075E+01 |
| H | 1.6080599117956993E+01  | 9.6528967129424093E+00  | 1.9324678155289163E+01 |
| H | 1.7886128319792878E+01  | 9.9706738351585074E+00  | 1.9661072221640026E+01 |
| O | 1.6828251991077895E+01  | 2.3746888359257823E+00  | 1.3190547408391495E+01 |
| O | 1.6328849877354244E+01  | -3.5982247056815170E-01 | 1.3848915866627459E+01 |
| C | 1.5844018703671935E+01  | 2.3676662818791547E-01  | 1.2633822724133122E+01 |
| C | 1.6380842680731305E+01  | 6.6460461273322280E-01  | 1.4817503180774477E+01 |
| C | 1.7307264616338422E+01  | 1.8848474195571243E+00  | 1.4449111746320151E+01 |
| C | 1.6695271565454544E+01  | 1.3809260060360762E+00  | 1.2127032807742898E+01 |
| H | 1.7117506769709877E+01  | 2.7388096993907616E+00  | 1.5176677795215152E+01 |
| H | 1.8363098128952924E+01  | 1.5907218638645597E+00  | 1.4383418756494386E+01 |
| H | 1.6710428658692244E+01  | 2.7462905972150348E-01  | 1.5783729007501623E+01 |
| H | 1.5378946535352516E+01  | 1.0916403655716636E+00  | 1.4920644520189475E+01 |
| H | 1.6135113192461013E+01  | 1.9263661552721447E+00  | 1.1314475354773476E+01 |
| H | 1.7649690075415226E+01  | 1.1044964867205553E+00  | 1.1634814666283297E+01 |
| H | 1.4879118192220748E+01  | 6.8923910986265213E-01  | 1.2953684777404449E+01 |
| H | 1.5676089587943885E+01  | -5.4250307089203598E-01 | 1.1901051922095972E+01 |
| O | 1.3468746362205483E+01  | 5.6059242109431757E+00  | 1.6241740455921764E+01 |
| O | 1.3216591360124717E+01  | 7.2847916164690112E+00  | 1.8538745604584179E+01 |
| C | 1.3981161248848531E+01  | 7.6393732444950500E+00  | 1.7422020950559475E+01 |
| C | 1.3269194318422917E+01  | 5.8580090696591887E+00  | 1.8646703716063211E+01 |
| C | 1.2740998267707360E+01  | 5.1846041869104722E+00  | 1.7363199331031591E+01 |
| C | 1.3438728416099046E+01  | 7.0205133300703659E+00  | 1.6094990993605386E+01 |
| H | 1.2829740649977419E+01  | 4.1082956748053343E+00  | 1.7489237295599189E+01 |
| H | 1.1573849449067559E+01  | 5.4603528599541118E+00  | 1.7240415024158466E+01 |
| H | 1.2636259060222580E+01  | 5.6419314939102119E+00  | 1.9479610198865181E+01 |
| H | 1.4263956086824358E+01  | 5.5355349332195720E+00  | 1.8886652208754537E+01 |
| H | 1.4100246563914082E+01  | 7.2511441755038382E+00  | 1.5227913033365017E+01 |
| H | 1.2429309907528490E+01  | 7.3771089070627385E+00  | 1.5838307660293339E+01 |
| H | 1.5056142922866538E+01  | 7.4050254304491733E+00  | 1.7575980365015738E+01 |
| H | 1.3941102114194784E+01  | 8.7215378751507391E+00  | 1.7348027322828546E+01 |
| O | 1.4925424878268695E+01  | 1.2459078476150411E+01  | 6.4462337893535242E+00 |
| O | 1.3037811021419673E+01  | 1.2470077964822396E+01  | 4.3019219840989793E+00 |
| C | 1.3831692608847453E+01  | 1.3665967810812001E+01  | 4.5214066034772973E+00 |
| C | 1.2802609479638116E+01  | 1.1869595616417332E+01  | 5.5791650404232769E+00 |
| C | 1.4075742433879238E+01  | 1.1375577699230332E+01  | 6.1897574173340635E+00 |
| C | 1.5114057050946748E+01  | 1.3373434920861691E+01  | 5.3000150630923448E+00 |
| H | 1.3838756074761644E+01  | 1.0852309599645235E+01  | 7.1525683382089209E+00 |
| H | 1.4550163773231120E+01  | 1.0678140361771918E+01  | 5.4602705953256416E+00 |
| H | 1.2198264480140438E+01  | 1.0954859854489845E+01  | 5.4308139857433266E+00 |
| H | 1.2366840022977049E+01  | 1.2617142085782991E+01  | 6.2297629606803619E+00 |
| H | 1.5642932041046169E+01  | 1.4249341744853185E+01  | 5.7214661949085031E+00 |
| H | 1.5838189309346673E+01  | 1.2810133417662765E+01  | 4.6497137354160829E+00 |
| H | 1.3182993567804617E+01  | 1.4422284536713267E+01  | 4.9564514882174491E+00 |
| H | 1.4002148931020329E+01  | 1.4122458261215042E+01  | 3.5013260097129546E+00 |
| O | 3.1557740754657676E-01  | 4.1687680592129359E+00  | 1.3561422515931444E+01 |
| O | 2.3167360214136421E+00  | 2.6725611232327799E+00  | 1.2058259844528969E+01 |
| C | 2.4314311492140628E+00  | 2.8727640425304055E+00  | 1.3458901319809717E+01 |
| C | 1.5432299997667560E+00  | 3.8070483216252060E+00  | 1.1515920023568615E+01 |
| C | 2.1787771019629470E-01  | 4.0182897386119727E+00  | 1.2156622319807457E+01 |
| C | 1.127685698333663E+00   | 3.0864120748303105E+00  | 1.4138999354150897E+01 |
| H | -1.6545302131528886E-01 | 4.9788213638606118E+00  | 1.1732467283897579E+01 |
| H | -5.6884345135638359E-01 | 3.2463873265522771E+00  | 1.1936254824537084E+01 |
| H | 1.4036564790628596E+00  | 3.5404159055335302E+00  | 1.0488339120450469E+01 |
| H | 2.1484295367562245E+00  | 4.7043851549114493E+00  | 1.1642644067207570E+01 |
| H | 1.2121785744498133E+00  | 3.2908534889397791E+00  | 1.5201418152662356E+01 |
| H | 6.7550845732258002E-01  | 2.0891570490784916E+00  | 1.4043295301507985E+01 |
| H | 3.0089579264360955E+00  | 3.8217880720700621E+00  | 1.3604997759724489E+01 |
| H | 2.9804371514334749E+00  | 1.9756791228873130E+00  | 1.3773921223588220E+01 |
| O | 1.4401604747864508E-01  | 1.8911728653218411E+01  | 8.7216201677529579E+00 |
| O | -1.6648662199600703E+00 | 2.1231468199357799E+01  | 9.1613911939250201E+00 |
| C | -3.3853799010920255E-01 | 2.1153742940322314E+01  | 7.108857393922481E+00  |
| C | -2.0873611041695157E+00 | 1.9930258509451978E+01  | 9.0360246930618331E+00 |
| C | -1.1238086991224718E+00 | 1.9042765753947332E+01  | 8.2257473266992314E+00 |
| C | 7.0057352017762664E-01  | 2.0309552509339401E+01  | 8.8632566127264365E+00 |
| H | -1.593129228356586E+00  | 1.8064199447206594E+01  | 8.2214739632507605E+00 |
| H | -1.1365897371674449E+00 | 1.9473719384360606E+01  | 7.2490495111528856E+00 |
| H | -3.0076725485690354E+00 | 1.9951101536517733E+01  | 8.4294555793219086E+00 |
| H | -2.3515884704742396E+00 | 1.9555197908428454E+01  | 1.0023665442515286E+01 |
| H | 1.6885997797859191E+00  | 2.0204811512601005E+01  | 9.3304810103768752E+00 |

|   |                         |                        |                        |
|---|-------------------------|------------------------|------------------------|
| H | 8.5521295365945083E-01  | 2.0706730224908380E+01 | 7.8351241102510345E+00 |
| H | -3.7252103694441263E-01 | 2.0724066276202358E+01 | 1.0724017431378456E+01 |
| H | -4.2718100873863414E-02 | 2.2212363145470572E+01 | 9.7969114445279466E+00 |
| O | 7.8469147261989249E+00  | 2.1481331307301804E+01 | 1.8227022300456923E+01 |
| O | 1.0354533946706903E+01  | 2.1378619451080073E+01 | 1.9671165311659355E+01 |
| C | 9.4661558217699451E+00  | 2.2553249298888101E+01 | 1.9735381747009590E+01 |
| C | 1.0203765586514079E+01  | 2.0797735718227006E+01 | 1.8422779371087415E+01 |
| C | 8.7597532800896367E+00  | 2.0371991179773637E+01 | 1.8037832814981982E+01 |
| C | 8.0360895416950324E+00  | 2.2085668658499323E+01 | 1.9532129869433636E+01 |
| H | 8.8007067259660321E+00  | 2.0007050435546041E+01 | 1.6984441735246406E+01 |
| H | 8.3980179928808614E+00  | 1.9495843946298343E+01 | 1.8613241713715318E+01 |
| H | 1.0900830882258250E+01  | 1.9935644199523789E+01 | 1.8366338939884610E+01 |
| H | 1.0495340006736747E+01  | 2.1564727935774286E+01 | 1.7621017138319214E+01 |
| H | 7.3479321810159961E+00  | 2.2931202113846556E+01 | 1.9636190832719638E+01 |
| H | 7.7771538317480156E+00  | 2.1261859020429025E+01 | 2.0239983026260365E+01 |
| H | 9.8559387513660841E+00  | 2.3358646395570663E+01 | 1.9074932165791104E+01 |
| H | 9.5278204946222207E+00  | 2.2931582733453784E+01 | 2.0786386073631260E+01 |
| O | 8.7098265354132689E+00  | 5.8219602722514301E+00 | 1.9825201426732232E+01 |
| O | 7.3652311616343935E+00  | 8.1716251936738118E+00 | 2.0624120113605411E+01 |
| C | 8.8208610226740234E+00  | 8.1194055690175659E+00 | 2.0534811552613046E+01 |
| C | 6.7412213927846549E+00  | 6.8506058298053185E+00 | 2.0900414824919356E+01 |
| C | 7.2394338261576801E+00  | 5.8685024875719769E+00 | 1.9877648585256114E+01 |
| C | 9.2335547130683739E+00  | 7.1148634954034078E+00 | 1.9483017169508056E+01 |
| H | 6.9245918523803578E+00  | 4.7903770773603194E+00 | 1.9896923871741688E+01 |
| H | 6.7828541816572319E+00  | 6.2159279632891113E+00 | 1.8921624999857976E+01 |
| H | 5.6692412082066248E+00  | 6.8502336192266702E+00 | 2.0871918674954465E+01 |
| H | 7.1120998387259728E+00  | 6.5289708673894653E+00 | 2.1923195072689790E+01 |
| H | 1.0341882700247989E+01  | 7.0229488152577195E+00 | 1.9490773682867598E+01 |
| H | 8.9114438414554247E+00  | 7.3812984780586195E+00 | 1.8489331946013682E+01 |
| H | 9.1920432958708922E+00  | 7.8905009581252719E+00 | 2.1546905471608401E+01 |
| H | 9.1686790435565371E+00  | 9.1765312693483772E+00 | 2.0376270551137353E+01 |
| O | 1.4730056699182116E+01  | 1.6053525987013753E+01 | 1.8035979439929680E+01 |
| O | 1.4145785108003745E+01  | 1.7597844023093884E+01 | 2.0477237793116718E+01 |
| C | 1.4200627891818609E+01  | 1.8208682540646180E+01 | 1.9119829095343981E+01 |
| C | 1.5041435805439376E+01  | 1.6415245395878046E+01 | 2.0479638075148340E+01 |
| C | 1.4576784944325508E+01  | 1.5396810117134395E+01 | 1.9403989748921163E+01 |
| C | 1.3906026162842560E+01  | 1.7204717677611075E+01 | 1.7989315410805709E+01 |
| H | 1.5318252510871874E+01  | 1.4599935963317629E+01 | 1.9419861003983758E+01 |
| H | 1.3576079248983353E+01  | 1.4915000608700590E+01 | 1.9490980122626162E+01 |
| H | 1.4931282058819146E+01  | 1.6057006571012348E+01 | 2.1493004922375739E+01 |
| H | 1.6076989482915749E+01  | 1.6661531412652320E+01 | 2.0231296906331057E+01 |
| H | 1.4138914116247264E+01  | 1.7789392335087260E+01 | 1.7048276786644170E+01 |
| H | 1.2858107987357988E+01  | 1.6818876225645290E+01 | 1.8016620541242563E+01 |
| H | 1.5283465508060111E+01  | 1.8525081414919335E+01 | 1.8977979539667814E+01 |
| H | 1.3581745332161370E+01  | 1.9076483464218658E+01 | 1.9240221078905936E+01 |
| O | -5.0785723228355262E-01 | 1.5963456177101767E+01 | 1.8559658572047361E+01 |
| O | 5.6926348097031781E-01  | 1.3454409931414068E+01 | 1.8599098058788254E+01 |
| C | -8.5809690435573765E-01 | 1.3635602529748279E+01 | 1.8682038572809383E+01 |
| C | 1.3313505699829771E+00  | 1.4509986357835075E+01 | 1.9075234639681508E+01 |
| C | 9.1522798181467502E-01  | 1.5832308586285423E+01 | 1.8382554340677057E+01 |
| C | -1.1820038715003300E+00 | 1.4885219954991731E+01 | 1.7894413237341723E+01 |
| H | 1.4307176065417728E+00  | 1.6681421973422374E+01 | 1.8902681601126918E+01 |
| H | 1.1561884278478238E+00  | 1.5782924397464090E+01 | 1.7296859842185768E+01 |
| H | 2.3111936626070007E+00  | 1.4129276791720224E+01 | 1.8817562341438830E+01 |
| H | 1.2861111792023285E+00  | 1.4549240285831690E+01 | 2.0175575244156587E+01 |
| H | -2.2729860593306599E+00 | 1.5100740631621782E+01 | 1.7869699452876901E+01 |
| H | -8.6411999769834713E-01 | 1.4810627073226589E+01 | 1.6874672574553401E+01 |
| H | -1.2846103207730721E+00 | 1.3764827254563462E+01 | 1.9691966220892425E+01 |
| H | -1.3205753234307414E+00 | 1.2739997619223640E+01 | 1.8290775853108581E+01 |
| O | 6.4253156053818135E+00  | 4.2590861815443288E+00 | 4.3797039510647204E+00 |
| O | 7.8016893453737319E+00  | 2.8924332680649685E+00 | 2.2194461055998680E+00 |
| C | 8.4837692831859108E+00  | 3.8631660770696978E+00 | 3.0484210454366147E+00 |
| C | 6.4010926233829935E+00  | 3.2437153879615783E+00 | 2.1017568731905625E+00 |
| C | 5.7953822674751265E+00  | 3.3024514643211380E+00 | 3.4889078624810259E+00 |
| C | 7.8268062417875104E+00  | 3.9852792111539554E+00 | 4.4642334589561559E+00 |
| H | 4.7391649980270811E+00  | 3.6371442856812890E+00 | 3.2689508413321651E+00 |
| H | 5.7115814079419103E+00  | 2.2088814977080791E+00 | 3.9481731995029548E+00 |
| H | 6.0300563778803529E+00  | 2.5288507532992823E+00 | 1.3201319130617386E+00 |
| H | 6.3176011016619196E+00  | 4.2641732936797414E+00 | 1.6440960305732149E+00 |
| H | 8.2656342288339957E+00  | 4.8353770992180118E+00 | 5.0581418457063716E+00 |
| H | 8.0407057727035465E+00  | 3.0441836975729584E+00 | 5.0187286512389830E+00 |
| H | 8.5946095131937792E+00  | 4.8246541259654938E+00 | 2.5714886420775125E+00 |
| H | 9.5200279693380629E+00  | 3.5429862214070793E+00 | 3.0553677762349878E+00 |
| O | -2.5469729793683404E-01 | 4.5707193720196866E+00 | 8.5433355460325409E+00 |

|   |                         |                         |                        |
|---|-------------------------|-------------------------|------------------------|
| O | 1.8229084183195470E+00  | 5.6022069347824672E+00  | 6.9735293953177306E+00 |
| C | 1.6374960104080247E+00  | 4.1677746630944155E+00  | 7.1129895591719796E+00 |
| C | 1.3914408950812938E+00  | 6.3528986587928049E+00  | 8.0787798711834160E+00 |
| C | 2.4454309064577209E-02  | 5.9715411928737483E+00  | 8.5113514946774753E+00 |
| C | 1.4958426098705802E-01  | 3.8297283170649208E+00  | 7.3420036717088264E+00 |
| H | -6.3618116618903084E-02 | 6.2576647020793654E+00  | 9.5689109254074687E+00 |
| H | -7.3114926845909090E-01 | 6.5185217185364923E+00  | 7.8920478264102227E+00 |
| H | 1.2836222550314940E+00  | 7.3052107486828470E+00  | 7.5950558003421715E+00 |
| H | 2.1305075469055237E+00  | 6.2242022381790774E+00  | 8.8862782409927501E+00 |
| H | -1.3205603305454633E-01 | 2.7972289668005224E+00  | 7.5709163777152346E+00 |
| H | -4.4306777106551964E-01 | 4.1473018337738630E+00  | 6.4504226757011498E+00 |
| H | 2.2686280610014444E+00  | 3.7233874132778353E+00  | 7.9436850104306949E+00 |
| H | 1.9999874810169860E+00  | 3.7138269720437291E+00  | 6.1695747611839495E+00 |
| O | -2.9984132519457409E+00 | 1.4282982040767702E+00  | 2.9921284479472789E+00 |
| O | -1.1535516253593807E+00 | 1.8987391377098111E+00  | 5.1027382666968446E+00 |
| C | -1.1440826264343205E+00 | 6.1486555686446509E-01  | 4.3909089461448625E+00 |
| C | -2.5413253374384190E+00 | 2.2859486376213032E+00  | 5.2364345454244390E+00 |
| C | -2.9899924287156909E+00 | 2.6164350541249655E+00  | 3.8109617973014247E+00 |
| C | -1.7194841374820196E+00 | 7.5185751125138012E-01  | 2.9980548940162604E+00 |
| H | -4.0719404692691450E+00 | 2.9910605394699461E+00  | 3.8348059189192027E+00 |
| H | -2.2576928178657192E+00 | 3.2892991323537433E+00  | 3.746669535843679E+00  |
| H | -2.7578964853172909E+00 | 3.1557506845034560E+00  | 5.8344866559918955E+00 |
| H | -3.1601800371932924E+00 | 1.4694922094096206E+00  | 5.6401144586779308E+00 |
| H | -1.9670056400327542E+00 | -2.4396282115848680E-01 | 2.5710126690879025E+00 |
| H | -1.0414000141700130E+00 | 1.2650200200624457E+00  | 2.2471994777718542E+00 |
| H | -1.7966519861231516E+00 | -1.5211019418871234E-02 | 5.0535621626857230E+00 |
| H | -1.3213396956320722E-01 | 1.6797738822325467E-01  | 4.3986125523886681E+00 |
| O | 1.3870147723717972E+01  | 7.8042705007275943E+00  | 3.3497807459624345E+00 |
| O | 1.1548082153333400E+01  | 6.3635826880528308E+00  | 2.7860593818374211E+00 |
| C | 1.2805051618162249E+01  | 5.7040834057662115E+00  | 2.7971043223922285E+00 |
| C | 1.1689806718138550E+01  | 7.7467858819538629E+00  | 2.3279328133328736E+00 |
| C | 1.2573699054162825E+01  | 8.3686969693307685E+00  | 3.3273224418280796E+00 |
| C | 1.3841208304233545E+01  | 6.3753639199306296E+00  | 3.6358530222116046E+00 |
| H | 1.2808777923005033E+01  | 9.3891453048795128E+00  | 3.0405532542536338E+00 |
| H | 1.2058624466893953E+01  | 8.2392815547794527E+00  | 4.2899793561010222E+00 |
| H | 1.0728039275955412E+01  | 8.2864547606227266E+00  | 2.1974139883648296E+00 |
| H | 1.2123461478921602E+01  | 7.7079772400162803E+00  | 1.2853180775302380E+00 |
| H | 1.4857307216213927E+01  | 5.9750049628549888E+00  | 3.4892977068058353E+00 |
| H | 1.3678984849294928E+01  | 6.2364213301707681E+00  | 4.7335494904668121E+00 |
| H | 1.3040694613267817E+01  | 5.6819245473872657E+00  | 1.7315360673574212E+00 |
| H | 1.2565005797305940E+01  | 4.7106070354748972E+00  | 3.1267215122361653E+00 |
| O | 2.9823512072997058E+00  | 5.6376975787561001E+00  | 1.6614604238458824E+01 |
| O | 4.6391626285543799E+00  | 4.4406931900407240E+00  | 1.8688549102619564E+01 |
| C | 4.2017458879083422E+00  | 5.8632897951121272E+00  | 1.8851880748103355E+01 |
| C | 4.4936707003140466E+00  | 3.7959824713740935E+00  | 1.7409693958712126E+01 |
| C | 3.1631844479098667E+00  | 4.1592983608702427E+00  | 1.6757536089826008E+01 |
| C | 2.9811832176407056E+00  | 6.2069451066087344E+00  | 1.7971073307107343E+01 |
| H | 3.1106234002683588E+00  | 3.7708781424354583E+00  | 1.5736037926500796E+01 |
| H | 2.3369136179741470E+00  | 3.8211252178471971E+00  | 1.7410186105254230E+01 |
| H | 4.5427741194454647E+00  | 2.6543125328027690E+00  | 1.7519708723924797E+01 |
| H | 5.2261009993516723E+00  | 4.1474847495206655E+00  | 1.6657513813984593E+01 |
| H | 3.0417319112072718E+00  | 7.2589479430475405E+00  | 1.7767379265946758E+01 |
| H | 2.0864797758543636E+00  | 5.9487225557789163E+00  | 1.8543387372219765E+01 |
| H | 5.0554982464754659E+00  | 6.5837856728494906E+00  | 1.8630968881422550E+01 |
| H | 3.9364829768198923E+00  | 5.9471002079768658E+00  | 1.9918733223970118E+01 |
| O | 8.7724384717662236E+00  | 1.4058666425924685E+01  | 2.1006043473914730E+01 |
| O | 6.7026402166183914E+00  | 1.5832590349709850E+01  | 2.0152753729819892E+01 |
| C | 6.4437682698529812E+00  | 1.4821613582359401E+01  | 2.1040620882092508E+01 |
| C | 7.5963299840446634E+00  | 1.5233959185356037E+01  | 1.9103715344247625E+01 |
| C | 8.9022502734608420E+00  | 1.4959275320544771E+01  | 1.9749208706869897E+01 |
| C | 7.7269128990144056E+00  | 1.4506521171212528E+01  | 2.1867672612874554E+01 |
| H | 9.6230353525369754E+00  | 1.4369142609696924E+01  | 1.9086654853607239E+01 |
| H | 9.3711201096598984E+00  | 1.5880052455405636E+01  | 2.0111765953727254E+01 |
| H | 7.7261575473912734E+00  | 1.5878641798862985E+01  | 1.8225458740034405E+01 |
| H | 7.0973059870136472E+00  | 1.4352651859452829E+01  | 1.8659746208685640E+01 |
| H | 7.3621875896610964E+00  | 1.3708478974710689E+01  | 2.2491062068035038E+01 |
| H | 8.0901693228277747E+00  | 1.5349521300625078E+01  | 2.2460659713565725E+01 |
| H | 6.1169963612039844E+00  | 1.3926895465268521E+01  | 2.0496249148039059E+01 |
| H | 5.6207429823267931E+00  | 1.5117599324933336E+01  | 2.1659924131884303E+01 |
| O | 1.6918252510785326E+01  | 6.5376715701715629E+00  | 1.7943660625232546E+01 |
| O | 1.9603658245134469E+01  | 6.1896075436365665E+00  | 1.8917068754602589E+01 |
| C | 1.8562717896523427E+01  | 6.7172450113164874E+00  | 1.9769150610002942E+01 |
| C | 1.9352582983895761E+01  | 6.4300169805123764E+00  | 1.7549889574612745E+01 |
| C | 1.7950008451513000E+01  | 5.9294540189547433E+00  | 1.7200037684011171E+01 |

|   |                         |                         |                        |
|---|-------------------------|-------------------------|------------------------|
| C | 1.7135926410360447E+01  | 6.2821207846332934E+00  | 1.9287750183410118E+01 |
| H | 1.7758306266965086E+01  | 6.1220760055713015E+00  | 1.6188579844532264E+01 |
| H | 1.7837015554644772E+01  | 4.8315551109212667E+00  | 1.7380373841573512E+01 |
| H | 2.0162840534860262E+01  | 5.9052522216762275E+00  | 1.7005950612193345E+01 |
| H | 1.9481637816924295E+01  | 7.4892208094874402E+00  | 1.7262547882783643E+01 |
| H | 1.6461906674869070E+01  | 6.8919845377151931E+00  | 1.9906592564395019E+01 |
| H | 1.6839075135964936E+01  | 5.1641776512651987E+00  | 1.9514502805980555E+01 |
| H | 1.8658772186125805E+01  | 7.8038323966509786E+00  | 1.9894784907060817E+01 |
| H | 1.8760950783564397E+01  | 6.2131763250153149E+00  | 2.0720921861501498E+01 |
| O | 1.1927646603332674E+01  | 1.6884833608777619E+01  | 1.2533086006139335E+01 |
| O | 1.3272820070266260E+01  | 1.8282321962517578E+01  | 1.4713959989832139E+01 |
| C | 1.3977380882615373E+01  | 1.7310004912121290E+01  | 1.3894167675607488E+01 |
| C | 1.1900911529133616E+01  | 1.7958420781489789E+01  | 1.4701194885421781E+01 |
| C | 1.1269942041362548E+01  | 1.7845367000325005E+01  | 1.3324489665546489E+01 |
| C | 1.3348830166305122E+01  | 1.7203166490075443E+01  | 1.2505591516599031E+01 |
| H | 1.0216606673820269E+01  | 1.7427808663673769E+01  | 1.3470273085363520E+01 |
| H | 1.1281603891847688E+01  | 1.8790108819251138E+01  | 1.2785324417222933E+01 |
| H | 1.1455021386004045E+01  | 1.8870164939987774E+01  | 1.5207827967670816E+01 |
| H | 1.1695641955368492E+01  | 1.7020621706939220E+01  | 1.5244403852419007E+01 |
| H | 1.3872657876077417E+01  | 1.6446006922527129E+01  | 1.1906123213924472E+01 |
| H | 1.3557167645407379E+01  | 1.8182069957267746E+01  | 1.2023327111119114E+01 |
| H | 1.3883904045397173E+01  | 1.6294881138837905E+01  | 1.4402344010533451E+01 |
| H | 1.5032893014187477E+01  | 1.7650764048676816E+01  | 1.3867499457919665E+01 |
| O | 3.4989152226898250E+00  | 7.6810444633704584E+00  | 3.5067444654134383E+00 |
| O | 5.0662961466856640E+00  | 8.3454912986832444E+00  | 5.9236259370383673E+00 |
| C | 5.6099285717980694E+00  | 7.4148789569596651E+00  | 4.8731726846593784E+00 |
| C | 3.7000536728714186E+00  | 8.0164748315834835E+00  | 5.9814058228660425E+00 |
| C | 2.9498276953127212E+00  | 8.4238554542409290E+00  | 4.6320480010902010E+00 |
| C | 5.0735526904309243E+00  | 7.8293027179210153E+00  | 3.5923618174800347E+00 |
| H | 1.8733326862247370E+00  | 8.2237825921419958E+00  | 4.6037480004817199E+00 |
| H | 2.9755999560806750E+00  | 9.5288332360742860E+00  | 4.4847222131807341E+00 |
| H | 3.2378613466359085E+00  | 8.4852580580860248E+00  | 6.8527640664053466E+00 |
| H | 3.5193707370368266E+00  | 6.8660164350635684E+00  | 5.9487996300895363E+00 |
| H | 5.5851819089755095E+00  | 7.3312240632472641E+00  | 2.7973355290123889E+00 |
| H | 5.2321238123350424E+00  | 8.8946797201215446E+00  | 3.7141683819571338E+00 |
| H | 5.2949388521077108E+00  | 6.4150970326002605E+00  | 5.2017805949179285E+00 |
| H | 6.7101569269583825E+00  | 7.4368921681958859E+00  | 4.9011402465746698E+00 |
| O | 1.8109119720765161E+01  | 1.5143032464483491E+01  | 2.3657083788351962E+01 |
| O | 2.0840095760332748E+01  | 1.5723476992065295E+01  | 2.3878350625161698E+01 |
| C | 2.0029114678662058E+01  | 1.5731852993670547E+01  | 2.5060703618249942E+01 |
| C | 2.0135341934654164E+01  | 1.5971470675396857E+01  | 2.2647313189486137E+01 |
| C | 1.8912402328749376E+01  | 1.4998832245189989E+01  | 2.2488561939282960E+01 |
| C | 1.8838970521877229E+01  | 1.4770228749715285E+01  | 2.4811069341250548E+01 |
| H | 1.8159868001319108E+01  | 1.5303286846205056E+01  | 2.1698319889617867E+01 |
| H | 1.9138507408503326E+01  | 1.3933663602279468E+01  | 2.2314260020485129E+01 |
| H | 2.0810839086943952E+01  | 1.5779871496489919E+01  | 2.1881784346557723E+01 |
| H | 1.9782280465900225E+01  | 1.6988652063571848E+01  | 2.2696987273819786E+01 |
| H | 1.8107899704294855E+01  | 1.4711416525873096E+01  | 2.5596391055708807E+01 |
| H | 1.9256861205037435E+01  | 1.3773871196841011E+01  | 2.4738853520107305E+01 |
| H | 1.9681131379382570E+01  | 1.6727747076423871E+01  | 2.5160417135775681E+01 |
| H | 2.0706002960830471E+01  | 1.5424725167896717E+01  | 2.5917736487020171E+01 |
| O | 9.6838497918298572E-01  | 1.8975441605562747E+01  | 1.2360197097411922E+01 |
| O | 1.0511845729745224E+00  | 1.8343483896406156E+01  | 1.5139763949618903E+01 |
| C | 2.1408548995100429E+00  | 1.8127400339274953E+01  | 1.4293991400822467E+01 |
| C | -2.1318180722878813E-01 | 1.8400960506383797E+01  | 1.4329502270655730E+01 |
| C | -1.4490776107661987E-01 | 1.9360824291725436E+01  | 1.3164719678871052E+01 |
| C | 2.1147888642641357E+00  | 1.9085376882372412E+01  | 1.3143690609888674E+01 |
| H | -9.9111766010547664E-01 | 1.9029417845971935E+01  | 1.2465466440310756E+01 |
| H | -1.0310492977082036E-01 | 2.0455336834461246E+01  | 1.3329058360453869E+01 |
| H | -9.0371534879309690E-01 | 1.8739414261489379E+01  | 1.5099573252287072E+01 |
| H | -3.2563997015413776E-01 | 1.7358617664589922E+01  | 1.4042577839748914E+01 |
| H | 3.0108383900011124E+00  | 1.8911412870296225E+01  | 1.2494732697962762E+01 |
| H | 2.1331037500644565E+00  | 2.0185257480119269E+01  | 1.3444197380930044E+01 |
| H | 2.0034486918308643E+00  | 1.7111506561945639E+01  | 1.3853273249241619E+01 |
| H | 3.0393278070098755E+00  | 1.8131171148716415E+01  | 1.4933094690848087E+01 |
| O | -5.4929710726786496E-01 | -5.3986280396483488E-01 | 1.9775046190004790E+01 |
| O | -1.727282322492393E+00  | 2.9105835258776697E-01  | 1.7305365593955433E+01 |
| C | -1.9404364017804765E+00 | -1.0323418371810489E+00 | 1.7873639849553566E+01 |
| C | -5.5356108007945581E-01 | 9.0020913769145650E-01  | 1.7848543647394955E+01 |
| C | -4.6530179212916128E-01 | 8.6013021273260781E-01  | 1.9395423013644368E+01 |
| C | -1.8086075228108109E+00 | -1.1201970807604145E+00 | 1.9384556628270065E+01 |
| H | 4.7031971988230020E-01  | 1.2398786941116169E+00  | 1.9795071687759304E+01 |
| H | -1.3032287736237125E+00 | 1.4246627924279673E+00  | 1.9824983272128225E+01 |
| H | -5.0413364476608113E-01 | 1.9158181361636881E+00  | 1.7412002277601562E+01 |

|   |                         |                         |                        |
|---|-------------------------|-------------------------|------------------------|
| H | 2.8954705235738043E-01  | 3.1155253559207086E-01  | 1.7375147523161495E+01 |
| H | -1.6856611987363175E+00 | -2.1759423651344805E+00 | 1.9651621405897046E+01 |
| H | -2.7301196012623317E+00 | -6.2192205790637445E-01 | 1.9850328211210904E+01 |
| H | -1.2078518033468741E+00 | -1.7102730473627630E+00 | 1.7433995766683449E+01 |
| H | -2.8413562641013002E+00 | -1.4403738264578525E+00 | 1.7527841135141511E+01 |
| O | 5.6752999940345317E-01  | 3.4369261932867872E+00  | 2.3745539381296874E+00 |
| O | 2.9045353648583352E+00  | 4.8148398019607583E+00  | 1.7628399108894617E+00 |
| C | 1.6722709178245283E+00  | 5.5402599955527352E+00  | 1.7699811192193891E+00 |
| C | 2.7518078017045298E+00  | 3.3965708793546394E+00  | 1.4292325558084316E+00 |
| C | 1.8739091374005992E+00  | 2.8312054293363671E+00  | 2.4781094968904771E+00 |
| C | 7.6067710893729090E-01  | 4.8335075174162681E+00  | 2.7710934807898324E+00 |
| H | 1.8558221607571403E+00  | 1.7380672831292274E+00  | 2.3578233456246864E+00 |
| H | 2.1496600069063208E+00  | 2.9775697593270118E+00  | 3.4902671660168574E+00 |
| H | 3.7603216686312515E+00  | 3.0479705193363360E+00  | 1.3212554585952097E+00 |
| H | 2.1909649653859429E+00  | 3.3597366204066494E+00  | 4.9720999682011008E-01 |
| H | -2.4186107225926354E-01 | 5.2500357861305291E+00  | 2.7785950185077568E+00 |
| H | 1.1640030737401619E+00  | 4.9410348189730620E+00  | 3.7856254221164845E+00 |
| H | 1.1967143098983835E+00  | 5.6362463691567593E+00  | 8.0203519736933371E-01 |
| H | 1.9342573779156054E+00  | 6.6266671664483559E+00  | 1.9431780432492161E+00 |
| O | 1.5019765044492896E+01  | 8.1950180788104792E+00  | 1.2061860650536332E+01 |
| O | 1.7906635224981741E+01  | 7.9488024051513175E+00  | 1.1937541317873889E+01 |
| C | 1.7229365092506317E+01  | 9.2562625483153091E+00  | 1.2142101741851263E+01 |
| C | 1.6989555707148781E+01  | 6.9924901789550686E+00  | 1.1272787243455445E+01 |
| C | 1.5666215329789765E+01  | 6.8922697201462499E+00  | 1.2043934180898745E+01 |
| C | 1.5856486561361738E+01  | 9.0733069670117299E+00  | 1.2815506801182320E+01 |
| H | 1.4894504534078628E-01  | 6.2166729447028981E+00  | 1.1656606998391597E+01 |
| H | 1.5864227061113114E+01  | 6.5902575543354498E+00  | 1.3124714230674138E+01 |
| H | 1.7448217258340438E+01  | 5.9843832026016326E+00  | 1.1143639913307933E+01 |
| H | 1.6729584446800825E+01  | 7.3901732951447485E+00  | 1.0276274986698795E+01 |
| H | 1.5132012123357731E+01  | 9.8866053446318674E+00  | 1.2985006108482400E+01 |
| H | 1.6168989288107596E+01  | 8.6411845395191200E+00  | 1.3807194832473654E+01 |
| H | 1.7085454564445296E+01  | 9.6476875660911290E+00  | 1.1146187993786477E+01 |
| H | 1.793998955654438E+01   | 9.8755360132854442E+00  | 1.2770267113279415E+01 |
| O | 7.855543860172348E+00   | 1.2175784251093150E+01  | 4.7508828447647478E+00 |
| O | 9.2799765374752319E+00  | 1.0350561593541977E+01  | 3.1329024831099455E+00 |
| C | 9.7004332538003837E+00  | 1.1808576236878787E+01  | 3.3508240256872792E+00 |
| C | 7.8861959573607994E+00  | 1.0198818212267431E+01  | 3.2700970519445205E+00 |
| C | 7.5499625684831138E+00  | 1.0757846678187342E+01  | 4.6710149907451450E+00 |
| C | 9.2890889896179640E+00  | 1.2359325843123056E+01  | 4.6712627820445915E+00 |
| H | 6.5171458183182454E+00  | 1.0583548024577963E+01  | 5.0023985023467530E+00 |
| H | 8.2520831010591191E+00  | 1.0270125411018567E+01  | 5.4038845586770581E+00 |
| H | 7.6018916675835229E+00  | 9.1176904666203722E+00  | 3.1625420299570326E+00 |
| H | 7.3593775032510900E+00  | 1.0667977403986677E+01  | 2.4035172420075979E+00 |
| H | 9.3649163163643490E+00  | 1.3423571199407904E+01  | 4.7876733154051951E+00 |
| H | 9.8084385274164969E+00  | 1.1917573264092283E+01  | 5.5503530614074652E+00 |
| H | 9.2905955572051528E+00  | 1.2357824414872294E+01  | 2.5346766224972277E+00 |
| H | 1.078132464077220E+01   | 1.1783733234430352E+01  | 3.1464857919904277E+00 |
| O | 8.2913535885503720E+00  | 1.7953693385631315E+01  | 6.3514391756616577E+00 |
| O | 9.3461737354748831E+00  | 1.5585776437060918E+01  | 5.3976350811686578E+00 |
| C | 1.0126861106990246E+01  | 1.6808347926981575E+01  | 5.2776980214369358E+00 |
| C | 7.9871810867363591E+00  | 1.5932665695618843E+01  | 5.2772867320419063E+00 |
| C | 7.3764892544851870E+00  | 1.6833149290473759E+01  | 6.3331156547751277E+00 |
| C | 9.6950263977613496E+00  | 1.7669696391316208E+01  | 6.4250375530067982E+00 |
| H | 6.4224421972053314E+00  | 1.7251386800332082E+01  | 5.9416311694721227E+00 |
| H | 7.1371201969825568E+00  | 1.6398744092378827E+01  | 7.2915582969587671E+00 |
| H | 7.4537588187417230E+00  | 1.5019360214224548E+01  | 5.2494633370709494E+00 |
| H | 7.7576312618271821E+00  | 1.6414467852545826E+01  | 4.2988559178088650E+00 |
| H | 1.0116378798787242E+01  | 1.8714057605321344E+01  | 6.3434942596924042E+00 |
| H | 1.0056847335660992E+01  | 1.7311321149494209E+01  | 7.4250075248704821E+00 |
| H | 9.9323696296151294E+00  | 1.7319767821321278E+01  | 4.3266309913732686E+00 |
| H | 1.1197499997136850E+01  | 1.6601746648093393E+01  | 5.3285677615071680E+00 |
| O | 5.9816403722725333E+00  | 5.3925775417609332E+00  | 1.4834175702603980E+01 |
| O | 8.3005116355878172E+00  | 6.8301526478445806E+00  | 1.4565714078897196E+01 |
| C | 7.1096901053093582E+00  | 7.4867642588112258E+00  | 1.4924079185235140E+01 |
| C | 8.0593528586518062E+00  | 5.7412574734164785E+00  | 1.3624829007204237E+01 |
| C | 7.1391058117162496E+00  | 4.7190030173290012E+00  | 1.4353050573702026E+01 |
| C | 6.2570407429192043E+00  | 6.5358374029548321E+00  | 1.5698174189722916E+01 |
| H | 6.7886706554209342E+00  | 3.8859039483276963E+00  | 1.3712131156024812E+01 |
| H | 7.7932481344823081E+00  | 4.3098066296006241E+00  | 1.5149035310739221E+01 |
| H | 9.0874838493529442E+00  | 5.2985423613779377E+00  | 1.3437538217575971E+01 |
| H | 7.6224530862967521E+00  | 6.1005747083440376E+00  | 1.2685406668742205E+01 |
| H | 5.2954889168259118E+00  | 6.9060772298954207E+00  | 1.6069984337589556E+01 |

&END COORD  
&VELOCITY

1.4307970980799900E-04 -1.0234770120118470E-04 -2.0185859338402358E-05  
-1.2690893042942978E-04 7.4157823197941117E-05 -2.5756815111356984E-05  
-8.9525088950484152E-05 2.9617493914298632E-04 -1.5742482180959951E-04  
-1.7507079105652117E-04 1.5734112060034990E-05 -1.0369330587732701E-04  
1.7116709254476670E-04 1.8137589759143228E-04 -3.9601507537978807E-04  
1.4592075757632753E-04 2.6103902535012828E-05 -1.9124585963225136E-04  
1.7263489500117646E-04 3.4445670783363056E-04 -1.4916837433307428E-04  
-5.1432541986455550E-04 5.0754627420217778E-04 -3.0134380566535574E-05  
-2.7034322300622512E-04 -1.1029317590962126E-04 -2.4192846508723742E-04  
-3.0489884487981569E-04 8.6792155869226683E-05 8.1482139557477977E-05  
6.6546790593451826E-05 1.0742360176951255E-05 1.5233224580356162E-04  
-4.1317366844399208E-04 1.7888357265706374E-05 8.3646294743002389E-05  
3.3456443795967653E-05 -2.2695454012563483E-04 1.1248146475350593E-04  
6.6633526451200298E-05 1.1000513091448310E-04 -6.1636748064518201E-04  
-1.7061944589615263E-04 -1.8601539804374679E-04 6.9964603256162224E-05  
2.9740450834793555E-04 -1.8795057985778325E-04 -1.5313043165245184E-04  
6.5459359989073949E-05 1.4697475841726876E-04 2.7875044373330344E-04  
7.4077417817981441E-05 7.9220095380935535E-05 -1.0532510387926452E-04  
-1.0954940878476573E-04 -1.1558392628095111E-04 1.7549923830219080E-04  
-4.3581248682061019E-04 -9.0859007179352645E-05 1.8595056860987641E-04  
-7.3921045065572096E-05 1.8825338555652181E-04 -8.2587720403462118E-05  
4.9607877253354533E-04 -9.9457439929485778E-05 -4.8872055479909002E-04  
-2.1242674355822201E-04 3.3115923963944195E-04 4.4328474422257008E-04  
-1.0419152446820570E-04 2.9545375440327264E-05 1.2601647484366584E-03  
1.9523007731163438E-04 5.2394871635588476E-04 4.6331382737701708E-04  
3.5931478573197556E-05 -6.0164208342495452E-05 2.1778844423714876E-04  
-1.4347362130589527E-04 -7.0641508356713862E-04 -5.8036731013247995E-04  
-1.9620504258836314E-04 6.1331870307647710E-04 9.2185796448082950E-04  
5.0644515279559324E-04 -1.1415142568077762E-03 -1.0607444542574355E-03  
3.1015617782820444E-04 -4.2914140000014939E-04 5.9005578860638010E-04  
9.2691767342742393E-04 -1.0983455793342424E-03 3.8844283859210192E-04  
-3.2398168978552599E-04 7.3476203292601488E-05 -3.8390386044954640E-05  
8.2478016989860810E-04 -1.3215717459951119E-03 -3.1359110171074699E-05  
1.1266540902148132E-03 2.1854192262905504E-04 7.9097683836870647E-04  
-1.5162086461975626E-04 6.2212189890905982E-04 -6.7337478069109653E-04  
-9.2113597629031444E-04 -1.3683197092051639E-04 -3.9286006722742391E-04  
6.5426554649559011E-04 -2.0410062085418171E-04 6.3022064220893731E-04  
-6.777706506662913E-04 -2.5087991699568119E-05 4.4472306942846385E-04  
3.1774575311536844E-04 -2.6999550134039528E-04 3.8041140681160338E-04  
2.0953717122434854E-05 7.6689400196264240E-05 -1.7323387941667871E-04  
-1.1269243601049984E-04 -5.5838939515264838E-05 3.9190826050632643E-05  
-1.8216510352459518E-04 -3.2054778684617840E-04 -3.5624792564792687E-04  
-3.0095977212500348E-04 -2.2329515162320787E-04 -1.4125282291252119E-04  
2.0799145874063216E-04 -9.0282025919379200E-04 -1.1612449389900037E-04  
1.9124164173763876E-05 -1.3740758011099877E-04 -3.4423472650570397E-04  
-1.0399380851222571E-04 -6.5686357608292338E-04 9.9024458639108468E-05  
1.6690749190803391E-04 -1.6773268740795957E-04 -7.7943074700967223E-05  
-3.5082062391586744E-04 5.6296406433517380E-04 8.6224954468547635E-04  
1.4666702871485638E-03 -2.7172453470614095E-04 -2.1408039456718219E-04  
8.9369463461379603E-05 5.5085554384883397E-04 2.7242060743482596E-04  
-1.5709092102311162E-04 2.7541969023331278E-04 9.8684973279141152E-05  
2.8695693561534859E-05 1.1210607952975896E-04 2.9576957439332363E-04  
4.2044862918012220E-04 4.8541203897333725E-05 -7.9477829139807334E-05  
5.1977663404613450E-04 7.9099900134492007E-04 -7.5830720598246028E-05  
-2.2007803537993320E-05 1.9798979876259952E-04 -2.4212534341599018E-05  
-2.7674115109721454E-05 -5.2319030506311437E-05 8.3937056404776079E-05  
1.0265391318558231E-04 5.3593093082649217E-04 -3.5897505893851665E-04  
-8.2866447104165024E-04 -1.9391947570782716E-04 -3.2915535953369907E-06  
-9.0658754191522085E-05 -4.7207282279936816E-04 -2.4689238231948067E-04  
-1.891478503658553E-04 -1.1318458610693815E-05 -4.2663952336498642E-04  
-4.2248471119138263E-04 5.4301174553561863E-04 8.3642936183321115E-04  
-3.9127119124773775E-04 -2.2934671277499054E-04 -9.9976192619529396E-05  
3.6256268716603341E-04 1.6821358559587586E-04 1.0108386243676489E-04  
-1.2099287877144376E-03 6.4632888529522466E-04 9.0160625454998743E-04  
4.9118717632173870E-04 -7.3361173754690897E-04 6.3193765925563809E-04  
1.0533180236960006E-03 -1.1894848622284052E-03 4.4727392771719119E-04  
-4.1825228703297462E-04 -6.3463524739669065E-06 -1.1544172425948670E-05  
-2.7147343497631175E-04 -4.7417861605483856E-04 -9.0155876656381373E-04  
-1.0985759851819166E-03 1.2000450146863997E-03 -1.2061103984790188E-05  
3.4864484466604967E-04 -1.9563920173139125E-04 -2.6951578961941072E-05  
-1.4770115179759504E-03 2.9805975855262359E-04 1.0309260904750677E-03  
-2.0101108985560607E-04 -7.4957959298826472E-05 -1.0996880388179528E-04  
2.8081656928124880E-04 1.9979885388049263E-04 -2.1920672968744767E-04  
-6.3343788859493292E-05 -2.1640711069964027E-06 -1.4960747112197938E-04



-1.0104686534042603E-04 2.2464584807827085E-04 -1.8081715532497239E-04  
-1.1033217951263619E-03 -1.1261945075336520E-04 5.0415801049133934E-04  
6.0021168095479257E-04 -6.3179205709252510E-04 -4.7789216290798185E-05  
-3.7697912349233293E-05 2.0884557220824751E-04 9.7471672524899298E-05  
-2.7557826407103203E-04 1.2862492530379046E-04 4.0602978535353408E-04  
2.0581497194317489E-04 -1.4214580542462724E-04 -2.3323731592221982E-04  
-2.1594722803017929E-04 -1.6417851154858617E-03 -9.6431907042277031E-04  
-7.0600181691735217E-04 6.0702478659736337E-04 1.8992424955812910E-07  
3.5617346148376650E-04 -2.0281000278274878E-05 1.1298047498695452E-03  
-5.2303712533412075E-04 3.1480769831523849E-05 4.1831261384503074E-04  
1.3244036341036866E-04 -5.7726714645046429E-04 7.3038641717860608E-04  
-1.1431045738194786E-04 -2.4231160723568165E-04 1.7985035192989509E-04  
8.5008909895780685E-04 2.0080808407688393E-03 1.7432822327827178E-04  
-2.2096762465949993E-04 -5.4915850561002629E-04 -4.0329451702558264E-05  
-7.3615251919336255E-05 -2.8865620375969947E-04 -2.2584161872884803E-04  
2.1974360752822299E-04 -1.3004512305703084E-04 6.4691035651351210E-05  
-3.4839783821941686E-04 3.5774048952596954E-05 1.0171188053588493E-04  
1.7821164208903218E-04 6.3664206096427907E-05 -2.9021941997606823E-04  
1.4070568896153293E-04 -6.5251876977371842E-05 -1.2219840671820180E-04  
-1.5694117653973808E-04 5.1059646113998892E-05 1.1636474709983079E-05  
1.5481089479182374E-04 1.8502225384480674E-04 2.5474144092175772E-04  
-7.6152798736762168E-05 -2.6509562509195119E-06 5.4841217668103023E-05  
-2.6344137820218441E-04 6.1145957432904815E-04 -1.0165248426820836E-03  
3.9370380067784843E-04 -1.4879235966157431E-03 3.1799927869626145E-04  
2.0396413522379175E-04 -1.1271908980731455E-03 1.0989161644544834E-03  
-2.0342780366017243E-04 1.1325962840134784E-03 -5.4236086531513886E-04  
4.1561088594091748E-04 5.7680846931073518E-04 -8.2717286008059446E-04  
1.4460457288096475E-04 1.2639382011494595E-03 -3.9971306719767554E-04  
7.1620565776922464E-04 -4.3283426104308786E-04 -4.5065556272155317E-04  
-7.1384130031347287E-04 8.6401406038224312E-04 8.0549571244619876E-05  
-2.3081919472657543E-05 2.3167757658238286E-05 3.1247497963604136E-05  
2.4287817758449582E-05 -5.6681130954777626E-04 7.7222896342668247E-06  
-1.7883086236753417E-04 1.6133464327170076E-04 -2.0203036974894884E-04  
-3.3018249554492706E-05 -5.0050103821941178E-04 2.2076059526996569E-04  
-4.2377684011084628E-05 -2.4565992311225868E-04 -2.1187927494672272E-04  
1.1018826905361966E-04 3.4260720620456686E-04 -6.0366060059140842E-04  
1.9120363274254562E-04 -6.9149086626129914E-04 -2.8235435279777804E-04  
9.5209401337666404E-05 -1.9096155857688583E-04 4.7486448609605151E-04  
2.1240527019102864E-06 1.2561201610213598E-03 1.4914526965055820E-03  
-1.8263052820649341E-04 -5.5804473386242910E-04 -2.7948088683041566E-04  
-5.5396187394613709E-04 -5.7685874129149994E-04 -5.9929214627577000E-04  
-6.1995112007916654E-04 8.3389795637868165E-04 -4.0058884552851613E-04  
-3.0069829744119346E-05 1.8512440314686501E-04 -2.1402503505654026E-04  
3.6306242912088139E-04 -5.4611271914071564E-05 2.5995377325341285E-04  
2.9501533926326275E-04 -4.7344513593676382E-04 -4.5782768597421884E-04  
5.9519092370143568E-05 1.2767784959110686E-04 -1.5258144839987116E-05  
-1.0477732556145937E-04 1.5657037211575756E-04 6.3031054518549411E-05  
2.8112380486283571E-04 -3.0795877045823014E-04 2.3701267659216198E-04  
2.4816140834043373E-04 -1.7220794800319099E-04 3.0314361013190791E-04  
-6.1942093468200516E-05 -2.1752633421228163E-04 -4.1179188683770309E-05  
4.3847851323596405E-05 -6.6873140072371440E-04 7.1331685585758963E-04  
2.0622024071127964E-05 5.6528177580826089E-04 6.1574915063871988E-04  
5.5997551584460715E-04 8.2645033319042886E-04 -1.0042901828127566E-03  
4.7757654970502142E-04 1.2564146526501375E-03 4.3651184145886726E-04  
2.5967351370762741E-04 2.4814090465188606E-04 -6.2110445598296171E-04  
-2.7356460740266892E-04 9.9535037053497845E-04 7.0866468101886035E-04  
1.2305628137939111E-03 3.5419865939085785E-04 1.1531042299491726E-03  
-6.1333669272946919E-04 1.4581658117973513E-03 -1.0171056271356567E-03  
1.7260623045663574E-04 -1.4846332036467316E-05 2.2006232043818226E-04  
-1.7085218041990608E-05 -1.7312493754515450E-04 5.4070313883478375E-05  
1.3918793241837367E-04 2.7971294089458517E-04 1.6470142173209627E-04  
3.1016182667613742E-04 -6.4891477857502523E-05 -9.5151483256956297E-06  
1.3268440821216536E-05 2.0012323209956965E-04 1.8937181067851219E-05  
-4.8092630489495134E-06 1.5516651989232259E-04 1.1960387412466257E-04  
7.1165184887387364E-04 -2.8289456211318218E-04 7.7895142929158628E-04  
2.246142542427026E-04 9.6569731588323391E-04 -8.1139276262426100E-05  
-5.55446291312113915E-04 1.6395447487097583E-04 6.3476767100925809E-04  
-1.6205809764989363E-03 -4.9474231434313675E-04 6.0423801171626240E-04  
9.4440467681433440E-05 -9.2547763417351510E-04 -4.3428995666971082E-04  
-4.463589332778276E-05 5.2638411097113969E-04 -1.8545988738732512E-04  
2.2976528271415630E-04 5.6665332746293955E-04 -1.6170649137875820E-04  
4.2207530937494596E-04 6.3872905937400904E-05 3.2758720732308232E-04  
4.5971831844065720E-05 2.1311080350020230E-04 1.8045143760596160E-04  
2.7019286483303000E-04 -6.3867683792088900E-05 1.8949061710585928E-04

1.0750251254568081E-04 6.5797806831654812E-05 2.1031231091670548E-04  
3.0129305175168557E-04 -3.2389336234475106E-04 1.9179666155668369E-04  
8.1932473296969624E-05 4.6675693052054964E-04 -2.4546156776041511E-04  
5.2837014474528597E-04 -3.9984909290854067E-05 -5.2018685641123725E-06  
-9.2068365482895023E-04 2.8694023328263205E-04 -1.0709835513684268E-03  
4.3010138431169162E-07 -5.8923373858090985E-06 -4.1467817024325529E-04  
-5.2889092993609358E-04 -1.4916358045012092E-04 3.3384007837921524E-04  
5.8271665143549089E-04 8.4981481145880426E-05 5.8853064621858361E-04  
-9.9688154551806030E-05 -3.1353148631631033E-04 4.1375523643425073E-04  
6.2207675136081823E-04 -3.5697880715624498E-04 7.4657429807769313E-04  
1.0727450248298027E-03 -8.2741481543821657E-04 7.0491219684909939E-05  
-1.0507708363449361E-03 -6.3408264800585081E-04 -4.6019642606569277E-04  
8.8591670403032952E-05 -3.4428729116779276E-04 -3.7053087688800144E-04  
5.6873914642386908E-06 -1.2365638530998903E-04 -1.7821412843098843E-05  
1.6191560022116952E-05 -4.2140260197530541E-05 -9.7609587234407406E-06  
-1.4026502959357459E-04 1.2488980549575502E-04 1.3708255687426720E-05  
4.6221135587004884E-05 2.8466459552094436E-04 6.0077397928196505E-05  
-1.1847914264280747E-04 8.7690878316754080E-06 4.2075572379002220E-04  
4.9996620411697139E-04 2.7774967740618007E-04 8.1730810956999174E-04  
1.6362238076386140E-03 7.6707461729807799E-05 -4.6330585038739858E-04  
1.8801511741219478E-04 -1.3560754487800006E-03 -9.6728998231714242E-04  
-6.7213793208348023E-04 -7.3657686128191337E-04 -3.4298374416604356E-04  
-2.2291767725917671E-04 6.0621519040517872E-04 -9.8050505657208188E-05  
2.8209150430326792E-04 7.5992528429456158E-04 1.0706331073549445E-03  
-3.6213576458769684E-04 1.4707739829352775E-03 -9.1474460156414170E-04  
-2.9377063051042355E-04 -6.8165001923994309E-04 -7.8181492332652746E-04  
4.6935977963247185E-05 1.0813695025236085E-05 2.2079105483255757E-04  
-1.3026554942825294E-04 2.6863829606319373E-04 -1.5100157542542459E-04  
-6.0133871168066161E-05 -8.7801489559040776E-05 8.8978279390270089E-06  
1.3766197661204051E-05 2.3251771597516905E-04 1.2724885427056081E-04  
-1.5454447795271373E-04 6.7639550678750464E-05 -4.1168912307527113E-04  
-2.3530768402566299E-04 1.5570226254995269E-04 2.7725214968611816E-05  
-4.6491880359164622E-04 -1.6501990404319317E-04 -2.6843146331670902E-04  
-5.2106204823952509E-04 -1.2691343086056732E-03 1.7541169896986592E-04  
1.8212477472212782E-04 -3.1608484708161878E-04 -6.0260425144302185E-05  
1.0249114235073747E-03 3.3894773114020337E-04 -3.6209191265558510E-04  
-1.0478057897708602E-03 6.0889201471773060E-04 -2.2878780151142219E-04  
-1.1463473061544937E-03 7.2237499435779296E-04 -1.2027641872267320E-03  
-4.7304947828168527E-04 -3.1657421347409850E-04 -3.1143233096103602E-04  
-4.2943299079354685E-05 -1.9964494110766078E-04 -1.7146326813519168E-04  
9.7166845253630161E-05 1.2827892579105578E-04 1.1408374993844279E-04  
4.7125329268055394E-05 -1.9697934180269914E-04 -3.2791583084385148E-04  
2.7526000171327491E-04 -3.1958474310176131E-04 3.5086845676648353E-04  
-1.0868614371628834E-04 -5.0365142130693540E-06 -2.9506054081129775E-04  
4.2636404427612496E-05 9.9750662099981336E-06 -1.5322989850156070E-04  
-3.0717440182367737E-04 -3.3580514505005796E-04 -1.4096979293925775E-04  
1.2864430347808275E-03 -1.4308729470722721E-05 -8.1327309538187871E-04  
9.1599168609791427E-04 3.1005748888881884E-04 -1.4594067045309786E-03  
-7.2237816168797342E-04 -5.2932473591429355E-04 6.9583426794612752E-04  
-8.9850987986999026E-04 4.6299425410088995E-04 -1.1244312646945278E-03  
4.0905656723945119E-04 -7.3852201175401847E-04 1.3997228835182368E-04  
6.5691038915829025E-04 -1.7635602096782249E-04 -3.1734248371917076E-04  
-3.8752651387471493E-04 6.4274369659630926E-04 1.6716488231473437E-03  
5.9465406886743239E-04 -1.2380346257147617E-03 3.2465445113785159E-04  
-2.3187585485866422E-07 -9.5987918500436625E-05 -1.7058928226961352E-04  
2.5075305818266899E-05 2.6033854238695120E-04 -3.9189773505377836E-04  
-1.5665298609934567E-04 -5.3379020989044077E-04 -1.091785422313344E-05  
5.7405627086700513E-04 -1.5250876114483418E-04 1.9145490309954811E-04  
-2.0432451567105062E-04 -6.6165386430698219E-05 -3.5274945903854634E-04  
-1.1553126190660555E-04 1.6980832709446298E-04 1.5176942958009586E-04  
-2.6288325887100032E-04 -2.8230686310180066E-04 -3.4126966533281472E-04  
4.3807002446690142E-04 1.4524986048816192E-04 -1.1471485809836767E-03  
9.6014259915558873E-04 1.8829978853954119E-03 -5.2788459516106860E-04  
-9.0604291862849220E-04 1.9646853288511840E-04 -8.9591940507957493E-04  
-3.3639404058905344E-04 1.0083831260406727E-05 5.7576023505229060E-04  
-1.7609752669376674E-03 2.6816296399222492E-04 -7.4560255660533034E-04  
9.4589860855722266E-04 1.4356743809985345E-04 2.1269546292014625E-04  
9.6794555676322526E-04 -4.2673909069792279E-04 1.0465804143328925E-03  
-1.4518245848881901E-04 -5.2840231928102641E-05 1.8973099778606630E-04  
9.1112971622506252E-05 -6.4244701068539674E-04 2.4956880847592437E-04  
-2.7455917816215401E-05 -2.0017228284676490E-06 -1.3633302602802092E-04  
-7.9454116617543911E-05 -3.0599908861122713E-04 4.6108459542529642E-04  
9.1417596149944957E-05 -5.9577398791914905E-05 2.3725357127962578E-04  
2.4417351642000982E-04 9.2087467111150284E-05 -2.7198752074872166E-05

7. 2640453856797173E-04 -2. 7212841146774546E-04 4. 9380133654388309E-05  
-9. 7492762844580955E-05 -7. 1194139337580264E-04 -1. 2539218223689812E-04  
2. 9188314502465065E-04 -1. 2199515292013553E-04 -2. 6220120202044062E-04  
-7. 4139154573202738E-04 -6. 9886721722514861E-04 -1. 1350659196061861E-03  
-2. 1172858677281849E-04 -4. 2018181284151214E-04 -1. 9984273717943155E-04  
-3. 7470001282102841E-05 -1. 1620524770819664E-03 -7. 8463001234114235E-04  
-3. 7703591720438586E-04 -7. 5468695440307769E-04 -2. 9269623959930129E-04  
1. 0386789934707408E-04 -5. 5156231328649312E-04 6. 7347106211674375E-04  
-2. 3871153494908976E-04 4. 3006422316165958E-04 1. 4561851279300049E-05  
-8. 5434688172192228E-05 -9. 6722909880118393E-05 1. 5412516191973117E-04  
-1. 6453839220356033E-05 3. 7027258632799255E-04 -1. 3542337495309567E-04  
4. 1706874963386902E-04 5. 2419005985352392E-05 -1. 2412629590121532E-04  
1. 0962396484898806E-04 5. 1469127557990874E-05 -8. 0458718948134446E-05  
1. 6496291240645114E-04 2. 8937254056315905E-04 1. 5254540958690240E-04  
3. 8902206494376102E-04 -3. 5865704251173265E-04 -1. 9861931325491856E-04  
2. 6975826160274689E-04 3. 5552013987748748E-04 -3. 3911257539582352E-04  
-6. 1051322028610416E-04 -5. 9221508510225380E-04 9. 2746171858451435E-04  
1. 6916943793836552E-04 -2. 5809230023052265E-04 4. 4358912092125845E-04  
-3. 9853045026712157E-04 -4. 4654731491444038E-04 5. 9847122629151515E-05  
-4. 4720977368852027E-04 -1. 0274179586257867E-04 -2. 0899751387698496E-04  
1. 2772077853498846E-04 -4. 6907957091305241E-04 1. 4557513390060113E-03  
-1. 6552294497772179E-03 8. 2187438437232748E-04 -3. 8543887359529111E-05  
1. 0749845809417233E-04 2. 9070181869323872E-04 -2. 2551971014600579E-05  
1. 1634568155855161E-04 6. 1596299844302353E-05 3. 5666114089909355E-05  
-9. 7453044124913823E-05 3. 5537511785896321E-04 -4. 3744043492911316E-04  
3. 6072075213399569E-04 -1. 0945018642569573E-04 -2. 8069673578933895E-04  
2. 7873213887377491E-04 1. 5230985449867074E-04 -1. 0994161282962106E-04  
5. 2916011128833924E-05 -2. 7180950069124197E-04 3. 6102613815549504E-04  
2. 2013005391372670E-04 -1. 7198531883886068E-04 8. 7418160876566692E-04  
-1. 2848876527779154E-04 4. 4357085061205086E-04 1. 0188419248279635E-03  
1. 2565667810237534E-04 5. 4758720275143705E-04 -7. 1663677379714245E-04  
1. 4234275136084284E-06 5. 4758720275143705E-04 -6. 1987475727741370E-04  
-2. 6876460492626859E-04 -3. 8534464018283722E-04 3. 3447173019548955E-04  
-1. 2642919281836695E-04 -5. 5634348268180256E-04 -8. 1704750314734608E-05  
-3. 4155278294665200E-03 1. 3699315356532459E-04 -1. 4938832733239724E-04  
-1. 2870526982301434E-04 -3. 6583609762139564E-04 3. 1239979084800082E-05  
-1. 0097037343536636E-04 4. 1177120992507662E-05 -3. 7710238777629120E-04  
3. 0372720680115888E-04 6. 3650290164187927E-05 -1. 7390209468942701E-04  
-8. 9709392537605493E-05 2. 5657447029067308E-04 -2. 4650218528795415E-04  
1. 6509356446685862E-05 -2. 2372663567052820E-04 -1. 2800411557924290E-04  
3. 0501605500829829E-05 -4. 8849042647203299E-04 -2. 6100416656116900E-04  
-4. 2656245432512834E-05 -1. 1398945133226392E-04 1. 8656763225521244E-04  
-5. 0609243481379367E-04 -1. 0043861948823823E-03 -1. 0871169694903549E-03  
1. 4718399606575676E-04 1. 3584959346542385E-03 -3. 5803149618928625E-04  
1. 4671597182672443E-04 6. 5761911573211152E-04 8. 1428758727425743E-05  
-1. 7514189793443825E-04 -7. 9106256369372043E-04 4. 7536276990089868E-04  
8. 7656389356272416E-04 -3. 2373304526565970E-04 -7. 1405111238003168E-05  
2. 6687952409895258E-04 4. 9030668570341118E-04 1. 1938016344094579E-03  
1. 8302208786601194E-04 1. 0351170222075208E-04 3. 9959089194000364E-04  
-9. 6862119310966999E-04 -5. 2691137659800888E-04 6. 6089432875831192E-05  
5. 6745189940405919E-05 1. 7776429396353441E-04 2. 6416817217603472E-04  
3. 3931604014067110E-04 3. 3652383450582473E-05 -2. 6752356840256030E-04  
-1. 7796430285142183E-04 1. 0503990369393785E-04 -1. 3504808155915283E-05  
-2. 0572846934920216E-04 1. 1002226376600745E-04 1. 7654272643371444E-04  
-1. 5162907243294066E-04 -1. 2337985242711204E-04 2. 1660109350245198E-04  
-4. 3862860877986071E-04 2. 9067630843637146E-04 3. 7213322745982362E-04  
-6. 7984193740917929E-04 3. 8497841685458155E-05 -3. 4905314457138882E-04  
-5. 6203740813125659E-04 -4. 9221828777676151E-04 -5. 6628441152353889E-04  
-2. 1680201551100908E-04 2. 2597671278823151E-04 2. 7872668294958499E-04  
-8. 7980372588759577E-04 8. 7733101592349640E-05 4. 4648595551599488E-04  
-1. 9867170102981063E-04 3. 4926088669920869E-04 6. 6323003085150823E-05  
2. 7304851000361596E-04 2. 4756440335406594E-04 -8. 3578896847414763E-04  
-8. 7977082850875573E-04 2. 2989066432557834E-04 -4. 4028157796650982E-04  
-5. 5018196872778902E-04 1. 3337080086592036E-03 -1. 0210204232383351E-03  
-2. 8726916467737302E-04 -6. 4232443066802232E-05 2. 1085256423077824E-04  
1. 6238130040859098E-04 -1. 0806432996907050E-04 -2. 3892221501046614E-05  
-2. 0147988893293430E-04 3. 4326509756257823E-04 1. 5039799275018648E-04  
-1. 7721332016779506E-05 -1. 6460038693184316E-05 8. 7717247655098063E-05  
-3. 1853798006953962E-05 3. 082381757955553E-04 -1. 6654423917152628E-04  
1. 6382836610424127E-04 -1. 1765994937584100E-04 2. 8737888387720810E-04  
2. 8177824375742533E-06 3. 3648776572348538E-04 -5. 4836788673868315E-04  
-3. 4872086593116966E-04 2. 9605964298826316E-04 2. 8643003077725857E-04  
1. 0567545216852545E-03 1. 2520323141559020E-04 -1. 0500787993660962E-03  
4. 8296606913444701E-04 1. 9884145212735644E-04 8. 9964324544497239E-04

3.0311211010949506E-04 1.3450266832764712E-04 -3.2568172511546050E-06  
-8.4449716218332107E-04 -8.8842541161252475E-04 -8.5876759824440765E-04  
-9.6702184563747030E-04 5.2165816581240214E-05 -1.4448588530833635E-04  
-6.0526641062765077E-06 6.6480152941393415E-04 2.3360099509163470E-04  
-2.7444159615375564E-04 -8.4540467277182090E-05 -2.0781254062110453E-04  
-1.9476704074772219E-04 1.8197186376919373E-05 -4.9209658446791559E-05  
-2.6994631235684549E-04 4.6023456490079667E-04 -2.2044153462173512E-05  
5.3127696003046180E-05 -5.2621513197236819E-05 8.8427108100563317E-05  
2.3651644130062957E-04 -2.0590251053839565E-04 1.7679380775733025E-04  
3.0083164500827941E-05 -1.6388177360862608E-04 -1.1673144798937828E-04  
8.2044254242302783E-04 -1.4195219234699105E-03 -6.9186885377019541E-05  
4.1301918567331341E-04 -1.2404276216281272E-04 -9.5794337243153380E-05  
-7.9587554533439551E-04 2.2122507447660503E-04 5.2347530527971180E-04  
-9.7027257783150129E-04 -1.3204441451118249E-03 -2.2901161505034973E-04  
-3.2476288220874045E-04 4.7260436755279745E-04 -1.5065857645722800E-04  
5.5218044293474410E-04 -1.5546013337889444E-04 4.4874886227046733E-04  
-1.5483502080605681E-03 2.5402425097537627E-04 -3.6656102481518273E-04  
7.7286661490124557E-04 1.0025830870980115E-04 -1.3312450632659368E-03  
1.8699737684993926E-05 -3.0999586289464818E-05 8.8268587339680461E-05  
1.3830988446283654E-06 5.0359572213157218E-05 6.1630765231495674E-05  
4.3448849349951547E-04 1.3465470648265794E-04 -2.7256845047819164E-04  
4.1784365639454957E-05 -2.2191377181255591E-04 -2.8860774391292136E-04  
5.7273064084294524E-05 2.1443020036999739E-04 -4.5889055627490553E-04  
4.2921452623011404E-04 8.4021022474037579E-05 -5.3012058241362039E-06  
1.4235272701154868E-03 2.5663711955076750E-04 -1.5332943900307376E-04  
1.4902990727642625E-04 -1.5477534870385055E-04 4.1112203063277549E-04  
-1.0996155620250532E-04 1.1154433507363861E-03 1.1866676795326369E-04  
-6.6795431199226927E-04 2.8364518561293499E-05 -6.5859379728342419E-05  
-8.2038219114004263E-04 8.4706027870818675E-05 5.2618966193905407E-04  
3.7313816751648556E-04 4.8199377976793740E-04 1.0289048008794834E-03  
9.0113254339597434E-05 8.3532265684968564E-04 1.8683392175302606E-04  
5.6298924215851054E-04 5.7458461390508828E-04 -9.0946090468132135E-04  
-2.9309039477658580E-04 1.2531594438886122E-04 5.7027398715074010E-04  
-1.0525261056133302E-04 8.7838041552138990E-05 5.1538319536718788E-05  
-2.1014121461931470E-04 -1.6529091535172268E-04 -3.1067591924793190E-04  
-3.4122184316170252E-04 -3.1339405952048114E-04 -1.0970422400457183E-05  
-1.0958861909220225E-04 -5.9358679928598114E-05 -1.2891412841148619E-04  
2.0292481630002548E-04 4.1173478645856209E-04 -2.6379211839442837E-04  
-4.8621195872428439E-05 -1.2775905893200481E-04 3.5892507295111212E-04  
-9.7394906469523885E-04 -8.9583087373970973E-04 -4.6404707515193544E-04  
2.2252279950766112E-04 -4.0845105798094079E-04 -2.3344180683991900E-05  
3.7062217780446855E-04 1.4730757658021133E-03 9.6930975514172932E-04  
-3.5094213448302067E-04 1.5568890666169583E-04 3.0456168175833508E-04  
9.7276693867898655E-04 9.74968903833601492E-04 -6.5302061557914140E-05  
-5.8583641261040651E-04 -3.5251415442465677E-04 -4.3205061439579369E-04  
-7.6659134807705953E-04 2.9334277924651138E-04 1.6643131829886015E-04  
1.0541587440986075E-04 -1.6045766627233182E-04 -1.2605856795613771E-04  
-1.9925807575005926E-04 2.4765524363568346E-04 3.9642605790084684E-06  
-1.9662664298826112E-04 1.0167636087001731E-04 1.4125290043606357E-04  
2.5002682542772923E-05 -1.9802786939382210E-04 -1.3659444496710865E-04  
-1.5229163099346689E-05 4.3432429843376320E-05 -1.7227567527102768E-04  
1.3301058225471097E-04 1.7560448931003679E-04 2.0693798129026649E-04  
3.1820691993094649E-04 -1.4010400600753404E-04 -8.5327948322595721E-05  
7.2880619348542834E-04 4.1178293807557791E-04 2.9000963087365500E-04  
5.5829466360292552E-04 5.5173738528257270E-06 -8.1525515591588532E-04  
8.4467220301705307E-05 -9.2264224452097638E-04 -3.3353619058818916E-04  
4.4975788903092658E-04 9.8515763543227663E-04 1.6329073829898007E-03  
6.7415565850029936E-05 -6.2403862106484405E-05 5.4102148784091657E-04  
-9.8559907217970225E-05 7.4230550159014980E-04 -4.6016870133708037E-04  
-1.0592810152276046E-03 2.1542215492835890E-04 -9.5187818666559701E-04  
-6.1781778150601379E-05 -2.2833644803102221E-04 1.2410841700337467E-04  
-2.1578982929935872E-05 -2.2314732040561034E-04 2.3773399811086233E-04  
-9.7998586373573214E-06 -8.1096075065316617E-05 -5.4441875492126091E-05  
1.3362161051551821E-04 -4.1832205243974222E-04 -4.1218990389160152E-05  
-2.0682411969217623E-06 -2.2728924999506359E-04 -4.1741455066377368E-05  
-7.8377056623798571E-05 -3.6358287045029945E-04 6.892512800809288E-05  
3.4246900916159708E-04 -2.6716502705871359E-04 8.9538762034409086E-04  
-6.6291853312522438E-04 -2.7338440672963109E-04 -3.4134482043278366E-04  
-7.8285891493087807E-05 1.1220538189483309E-04 -8.4117038790800739E-04  
1.0340357423029136E-03 -3.9044382486487153E-04 8.6693595256225010E-04  
-1.0434089677632237E-03 5.6605785815337974E-06 1.5120794648239237E-04  
-1.0709995923450628E-03 -3.1389994337586915E-04 7.2089017575904725E-04  
-3.1867813344393155E-04 -2.8344156588324250E-04 -8.3860739217543655E-04  
2.9708252833928020E-04 -5.3931829751945298E-04 -8.0844390210433573E-05

-4.6168463932360119E-04 2.5364485174127411E-04 1.4382165351747210E-04  
 6.9050158013555255E-05 -6.9481093181628247E-05 6.0619582985293158E-06  
 -6.4146790444827545E-05 1.5773695173566032E-04 -2.4342671633119790E-04  
 5.5503097669883568E-05 -1.9758400662342693E-04 -8.5574890763182227E-05  
 -4.6693483520832200E-04 3.1889017720929444E-04 -1.4487092700558965E-04  
 -3.6092387375604866E-04 -3.7060571507163296E-04 2.9143096786220224E-04  
 -1.2325796030082138E-03 -6.1316804931335254E-04 5.8362436100731121E-04  
 6.7347278265451481E-04 3.2449567802888526E-04 1.6565675247361396E-04  
 -5.7500071515742394E-04 -2.9559599765135603E-05 -1.1231382555001159E-05  
 1.0236226040629934E-04 -1.0423324235115682E-03 2.8071882564129546E-06  
 1.7546354475441819E-04 -3.1431905317397978E-04 -6.3337820002903704E-04  
 1.2586862887587144E-04 6.6009814368827419E-04 9.3198456448632483E-04  
 -4.4948538490659429E-04 -4.6992517935877983E-04 4.7268122904673988E-04  
 6.4018654187898293E-04 -9.9938712119624251E-04 5.0109670359085846E-04  
 3.2055186155696946E-04 4.2173197550383798E-04 8.0812955941113904E-05  
 1.0343841876781435E-04 1.4658655680946980E-04 -3.4451249727735910E-05  
 -1.9369515216907272E-04 1.8428782959876704E-04 9.6955313335455925E-05  
 2.4319357311252014E-04 4.0409629763924789E-04 -4.3109854257941606E-04  
 -4.0316088670743272E-05 3.0807648183616570E-04 1.9018276207607272E-05  
 2.3206886841250739E-04 2.0581199317508159E-04 -1.9844901273299484E-04  
 4.6019691701570925E-04 -1.3292251642909805E-04 5.2091453603680341E-04  
 3.5829052724241784E-04 2.1622892760031132E-04 -1.2363045999028944E-04  
 -3.0309879769965759E-04 2.7738001312835060E-04 -1.4506709370170256E-04  
 -3.1944019790153293E-04 4.3846282694315884E-04 1.9370366148602016E-04  
 3.3109676455865510E-04 2.0077641613637113E-04 -6.3795251736025263E-04  
 9.5844721598267534E-05 6.7157050777117366E-04 1.0031018345012545E-03  
 -2.8392258410769156E-04 6.2194045795660956E-04 1.5547831487500085E-04  
 -3.8557071755073837E-05 -4.3943458608557937E-04 6.5368680327924098E-04  
 9.7108771182811260E-05 2.6918104949637924E-05 1.6261739600046871E-04  
 1.2304591906059830E-05 -2.3045839449842924E-04 -3.8512939377905256E-04  
 -3.1834800883392462E-04 -2.0355846935743668E-04 1.3171169207419950E-04  
 1.4733030198103161E-04 -5.1272229142422694E-05 2.2884323008686382E-04  
 1.9122547068004098E-04 1.5452013867099735E-04 1.6250143717654356E-04  
 1.7675754268564806E-04 1.3535696491253859E-04 2.2622203301731886E-05  
 -5.3684179316522124E-05 1.4998350191394246E-03 -4.4956275396626998E-04  
 6.8337185243157400E-04 -3.4668711321257054E-04 -7.6026464416492886E-05  
 -4.8730748930613020E-04 9.8034714695570467E-04 -1.2051635006180856E-03  
 6.1926751220536293E-04 6.4687533623825573E-05 -1.0273278819727107E-04  
 -1.2430629732393050E-03 2.5055980182765226E-04 1.3883037121333066E-03  
 -3.1865872148656909E-04 4.5326296491129390E-05 1.1379896266038283E-03  
 -3.0760198351858467E-04 -2.3129562474460833E-04 2.1547879380039460E-04  
 -1.2151909228288144E-04 2.1286340314383823E-04 5.4612428192133691E-04  
 6.8528377963405709E-05 4.3852027038586547E-04 -9.2704873440466084E-05  
 1.2588673509932930E-04 -1.5773062266089173E-04 3.0152603607455495E-06  
 3.8357663025054322E-04 -1.8043002213505218E-04 4.3043082023379732E-04  
 -3.8958620594043049E-04 -3.1349140630738942E-04 7.2994009624812638E-05  
 -3.2635593528149826E-04 7.6630508074846711E-05 -1.2089864011620453E-04  
 1.2173481375726749E-04 -9.3683897196706378E-05 -1.0969297882140021E-04  
 5.3056023569644859E-04 3.4266618312322127E-04 -5.3335190725724573E-04  
 -7.7468761603227381E-05 2.1437095186025933E-03 9.0874424107817615E-04  
 -4.9033977575358594E-04 8.2698779196540108E-04 -4.2688368561243064E-05  
 6.4068850129956917E-04 4.3021513989131420E-04 1.0502325280881291E-04  
 3.4318908850674017E-04 -2.4791404465665902E-04 1.9518390275230198E-04  
 -3.1073099317857492E-04 2.4595936319135744E-04 -3.3736004432520825E-04  
 4.1544927857046604E-04 -7.7369530996600211E-04 -6.7994058113147375E-04  
 2.0609259930316691E-04 -4.5793084841916858E-04 -3.9000384097954716E-04  
 4.8311884526573988E-04 1.9774040895797435E-04 -1.4602041920829369E-05  
 1.1226306454157866E-04 -7.4211585109912030E-05 -5.8413813944032513E-05  
 -2.1891661992895300E-04 1.5625357203298855E-04 -3.3322405216790272E-04  
 -2.1696654809593707E-04 3.4847601305623509E-04 -6.6995371682145990E-05  
 -1.6640152688712637E-04 -2.3994324905660089E-05 1.4335901746965839E-05  
 -6.4532113012976403E-05 -1.5880374771497756E-04 -6.7967745178391074E-05  
 -7.4318185033468546E-04 -1.2156245861891244E-03 -1.1960150826590655E-03  
 1.3054467349338369E-04 6.2010008082561178E-04 4.7470398665697393E-04  
 -6.3666094878664077E-04 1.0167178221178149E-03 5.1817829768900767E-04  
 -1.8029211370250615E-04 5.3243757446528141E-04 -7.7167332665775191E-04  
 -1.7331154034789015E-04 -6.4580487967290249E-04 1.9562540736592127E-04  
 -6.9864432151249859E-04 1.1598521600624522E-05 3.2117795399801185E-04  
 5.6894139078124460E-04 8.8811452230974945E-04 6.2353513880135825E-04  
 -1.6924270470442313E-04 -7.9521803751728977E-05 6.9026760979892126E-04  
 -2.5702064261452359E-06 1.5396538321912291E-04 1.2805441115065675E-05  
 3.7855423854186100E-05 4.0944541186680079E-04 -7.7897387353412966E-05  
 1.2686302387971357E-05 2.8292915744015452E-04 4.5189132768757960E-04  
 -5.1571484381420680E-05 9.0521730222663772E-05 1.4046622670720217E-04

-2.3254217587448931E-04  
2.5364242160913714E-04  
1.0666138267940359E-03  
-9.9004920246589952E-05  
-7.9483532386884106E-04  
1.8927373954029256E-04  
-3.2106636268271113E-04  
2.7885032393213891E-08  
3.3939349455702289E-04  
1.7469385518255060E-04  
-2.1680775096400473E-04  
-5.3286126291829633E-05  
-1.1942988719576301E-05  
-1.5749759568665971E-04  
3.9298281464323861E-04  
3.8883317325116928E-05  
-3.4965714331190462E-04  
7.0828375650675436E-04  
7.0828662247833746E-04  
6.3330634098403814E-04  
-1.0736953018700904E-04  
-3.8520837201283016E-04  
7.0858577552735866E-04  
4.6017162673337477E-04  
-1.7044226834371447E-04  
-1.9131601705237876E-04  
1.5357089013282043E-04  
-4.9685706795644512E-04  
2.4289839835586277E-04  
-2.2434285831732448E-04  
-8.6096264042651830E-04  
1.4209057086423535E-04  
-7.262307555387946E-04  
8.5862930579583654E-04  
-1.1711144361742379E-04  
-2.0575858190015586E-03  
1.1401360863672176E-04  
-5.1609754185256713E-04  
-3.7161214258141868E-04  
-2.8330477103713324E-04  
-2.7225496234395538E-04  
-2.5256332117041153E-04  
-5.0468370596578585E-04  
-1.0763542578398170E-04  
-3.2134309973947989E-04  
-1.1161737389077633E-04  
-4.9577841624625863E-05  
-8.4453412812873134E-04  
7.6497422165745603E-04  
-3.1030731279974738E-04  
-1.7948495261051829E-04  
-3.6932026381933397E-04  
3.2131258763814851E-04  
1.7423777573421676E-04  
-3.4319136843083375E-05  
-3.8086475422579046E-05  
-3.709304482880882E-05  
-8.6748875661070838E-05  
-1.0497159708800247E-03  
-6.3437988772520901E-04  
-1.1402769441015094E-03  
2.6267761088888522E-04  
-5.6293416302057053E-04  
4.2503471069061305E-04  
2.9696791848521874E-04  
1.6526609882432856E-03  
-1.3886483862039680E-04  
2.7763594881944274E-05  
1.2120275319015880E-04  
9.0105209232678999E-05  
-5.3707803472948141E-04  
3.5736643473151144E-04  
6.5552088180118246E-04  
-4.4930079518446143E-04  
-1.2233087110086375E-04  
3.7300831547666837E-04  
7.7951725097805266E-04  
-1.6097153918471696E-05  
7.6165926335172441E-05  
6.7874367548011487E-04  
8.2887035024829803E-04  
-2.1274745244686345E-04  
2.7147141942700660E-04  
-5.9949393035705755E-04  
1.2182183351871611E-04  
1.1292065720086191E-04  
2.6426651288060318E-05  
1.7691375470596209E-04  
1.8470742532606421E-04  
8.9886134384150061E-05  
3.9310437957809776E-04  
2.6613384985742976E-04  
-4.1551997522947963E-04  
-2.0568828301845255E-04  
7.4302889359392364E-04  
-3.2132533931061613E-04  
-3.3609253315207345E-04  
6.3768028669721811E-04  
-1.3269996778676065E-04  
-1.5794157840259409E-04  
3.6795957407061280E-05  
4.9986301542132852E-04  
2.4134007228119147E-04  
8.2485552315923012E-05  
-4.0061241710667028E-04  
-2.8394839657564967E-04  
8.9647550782426304E-05  
1.3153125950299364E-04  
-5.1352734821992312E-04  
9.0495358096928170E-04  
2.7854521628263969E-04  
-4.6062551371411865E-04  
6.4860456455285596E-04  
3.2836674990517532E-06  
5.3947068674425132E-05  
7.9105070129952758E-05  
-1.1230946356371037E-04  
-1.0169483365943329E-04  
2.9892642856179855E-04  
6.5238432541902440E-04  
-8.4049218553611141E-04  
1.9826097610387491E-04  
2.4881249582533430E-04  
4.6408755901934137E-06  
5.9121149047192611E-04  
-7.2524969739018474E-04  
1.4442151961701214E-04  
3.0726781501863549E-04  
-1.1379078539082958E-04  
-1.7346698084313823E-04  
1.8027760734008302E-04  
2.9235566283113162E-04  
7.0939303296680453E-04  
1.3765567301292117E-04  
-2.9770550906723927E-05  
1.0393373098284968E-03  
1.4825568085414260E-03  
-3.4674273101205458E-04  
-1.6908450398444639E-03  
5.2322110259140676E-04  
-5.2642835593477313E-05  
-1.4014224778930047E-04  
1.1990796773509734E-04  
-5.4838277162016495E-05  
-4.2520431944504693E-05  
-3.2908434642696235E-05  
1.6216345231251792E-04  
-7.1301708067743265E-04  
-1.4934882171572736E-04  
4.2354197754215382E-04  
1.0184254090757311E-03  
-8.3630025440860800E-04  
-6.5627363312810905E-04  
4.4736207159098943E-05  
-4.1796405050904058E-04  
1.4551205358587550E-03  
1.3049502213842651E-03  
5.3865723083382146E-04  
4.0966530515356949E-04  
-1.1529237974622231E-04  
-7.5004696031918356E-05  
-1.9767265610596814E-04  
-2.4877545200594631E-04  
-1.3623015387381263E-04  
-8.7099322953884109E-04  
6.3780434207747004E-04  
7.6534080816203904E-05  
-8.9678311712502903E-04  
-5.6088385708183343E-04  
7.6573415346473323E-04  
-1.9356463783443066E-04  
1.3151244778929565E-03  
1.7518392257563297E-04  
3.7838085970126536E-04  
-2.2042381452873908E-04  
1.9397126823867672E-04  
-1.8512121733458458E-04  
-5.1653895686818119E-05  
1.4146542010331649E-03  
7.5187517706706624E-04  
-2.7125856809401798E-05  
-2.2344296960971833E-04  
-2.2276239875240492E-04  
-2.8432886077415034E-04  
-4.7298777343210532E-04  
5.2991285735331519E-04  
-1.1307137088186161E-04  
-3.2351708151310997E-05  
-1.2428945765874231E-04  
1.4053465589585441E-04  
7.2721776346336810E-05  
-7.4965407138016522E-05  
-2.4034226047038910E-04  
8.5247297399827435E-04  
-6.3798310806576300E-04  
1.2285907482443748E-04  
-4.3743262261891202E-04  
8.4071570198905208E-04  
4.8350296012419295E-04  
-1.8054643905848625E-04  
-5.5745358644811764E-07  
2.5746093339994771E-04  
-6.7021476962090477E-05  
-1.1759160572523273E-04  
-1.0334787901761808E-04  
-4.7785298832459146E-04  
2.1871668451996020E-04  
4.9769721120660837E-04  
1.6301276192740766E-03  
-2.0548235780971287E-04  
-2.7401101968168711E-04  
6.8069322146387351E-04  
-1.1496172994118853E-04  
1.6051100894527839E-04  
2.1272946961153513E-05  
1.9548500810164749E-04  
3.4811407467093432E-04  
-2.3620458412144075E-04  
5.4575527986567590E-06  
1.2899697145450542E-04  
2.6031548225730685E-04  
3.8186499902657884E-04

-5. 1199374100775437E-04 2. 7611067940929844E-04 -2. 4254908197072112E-04  
-8. 4377939107525704E-04 -6. 4290690904407401E-04 -5. 4878056980731907E-04  
4. 053767792035291E-04 6. 7149550032800356E-04 -8. 2163032884018106E-04  
-2. 4244878845723866E-04 -5. 3210442572521294E-04 -2. 7649241860878043E-04  
-6. 0047782542608651E-04 8. 0876981825578689E-04 -6. 4012349792200325E-04  
-1. 2319550475839463E-04 -2. 6285996482074825E-04 4. 1605871310523889E-04  
-2. 6767431327792105E-04 -2. 7873778962138302E-04 -7. 5438653253311655E-06  
-2. 2746031948687865E-04 -1. 8633930002607681E-04 2. 0206386249425702E-05  
4. 0108344265816426E-05 -1. 7497322858820217E-05 -2. 8894270850731933E-05  
-3. 7804915818256669E-04 -5. 2247441971312809E-05 1. 1325546380121172E-04  
2. 3747397754315434E-05 4. 6278689619482819E-06 1. 1995861433129209E-04  
-1. 4585867015639339E-05 2. 9154646836541563E-05 3. 0093220649537590E-05  
-3. 6426412710973961E-04 5. 5267896172174235E-05 -1. 3108844458988159E-03  
1. 1850498004431279E-03 6. 2303392561721631E-05 6. 8510727813782339E-06  
2. 2559045291902758E-05 3. 6610663244492309E-04 9. 1807253594636620E-04  
4. 8519151035130258E-05 6. 3444803153690321E-05 -8. 7991142186845392E-05  
1. 1207437553887691E-03 -2. 1324168465512093E-04 -3. 1641763648780104E-04  
-5. 2225291620039990E-04 6. 5092422730330052E-04 4. 9071432091485779E-04  
7. 5034004066519653E-04 1. 4574869087136216E-05 -1. 1851447805975755E-03  
3. 4146201786680537E-04 6. 9021639669375684E-05 -1. 0008008879164468E-04  
-1. 0079346844683445E-04 -2. 2803178867224046E-04 5. 1749490841279692E-05  
1. 1909112138007352E-04 3. 0756141239030027E-04 1. 0339153383470746E-04  
-4. 4164181018745727E-04 -1. 5034106870832526E-04 1. 4128110524205204E-04  
4. 6036801929803399E-04 -1. 4646363154673748E-04 2. 8263647259936949E-05  
-4. 1410696927576726E-04 1. 7569614088600729E-04 1. 4710112606903546E-04  
-1. 3700404736834924E-04 -6. 9541230068541899E-05 5. 1111520432184421E-05  
-4. 4366598474740701E-05 -8. 0945246132847293E-04 -2. 1392993709906498E-04  
1. 1995640105799559E-03 8. 6916454711117230E-04 -7. 4598436769266385E-04  
6. 3486277049867130E-04 -9. 1335286144007388E-04 -4. 5370308785436735E-04  
-6. 1316421969667982E-04 4. 3021824744102948E-05 2. 7552994780579219E-03  
-1. 5558939539419268E-04 -6. 2449196042919691E-04 4. 7538336945516997E-04  
-1. 2476064687237905E-03 -8. 6042588239842348E-04 -7. 1921359812228652E-04  
-4. 1113637028130739E-04 8. 1820191409082390E-05 1. 4539530966065656E-05  
-1. 0481235822503506E-03 1. 5519294673284119E-03 3. 3372689601550171E-04  
-2. 7591148460282260E-04 2. 4233823397948873E-05 -2. 1236785041046496E-04  
5. 5118115338334507E-04 -1. 4014732391911807E-05 -7. 6353381134944886E-05  
-2. 2007734065265276E-04 -8. 6168351769430132E-05 5. 3793790247754609E-05  
2. 7160033674707162E-04 -4. 7775405878498870E-05 1. 4189729613733645E-04  
1. 4663080576468587E-04 -1. 1530964583358006E-04 4. 9351853766930562E-05  
1. 3866371054007700E-04 1. 5937173616640277E-04 8. 0629148545334904E-06  
4. 7629159009723187E-04 5. 5487552180530310E-04 -7. 6940866378751014E-05  
2. 3490099381964983E-04 -8. 3386430938812755E-04 2. 4627497356759345E-04  
-1. 9397047040683766E-04 -7. 5543629878595779E-05 4. 3750530512689259E-04  
8. 9025459681890641E-04 3. 8742310788595437E-04 6. 0079789167857530E-04  
5. 8019923851373599E-04 1. 8791876584059276E-05 -1. 0258918039583670E-03  
1. 3856188507241476E-06 -3. 2141171094463293E-04 -2. 6062533562256843E-04  
1. 8411618002447716E-04 -6. 5410347499849253E-04 1. 0137087199111950E-05  
1. 1100179935704192E-04 -9. 4483410587435480E-05 6. 0729257996216992E-04  
-7. 7362037610199794E-05 1. 1795602324527034E-04 -2. 7329813513145984E-04  
-5. 2863280543350287E-06 -1. 7688872100976118E-05 -2. 5656351893717331E-04  
2. 6691201891947569E-06 -3. 1226627078900397E-04 2. 4429057560700968E-04  
9. 3762207337075664E-05 -1. 7268050490640592E-04 1. 9689318520272445E-04  
1. 1043475543505482E-04 -2. 4624362654761359E-04 3. 4903368738417249E-05  
-5. 2385579581473414E-04 3. 4273713109436303E-05 -7. 6517272203285953E-05  
1. 4694871418369240E-04 5. 4672746194561154E-04 4. 7346211018007569E-04  
2. 9248854893836642E-05 3. 2044228698819015E-04 1. 6137540970685165E-04  
9. 0508008242019822E-04 6. 5652967016162323E-05 2. 3756030646190088E-04  
-2. 0746233721561432E-04 2. 6731921509879107E-04 -5. 4950529670360954E-04  
-9. 9552353848952500E-04 7. 5979384155869644E-05 1. 1374719678501452E-03  
-1. 2910374430122075E-03 -4. 0898819557026207E-04 9. 0191660835546811E-04  
4. 0330426321349939E-04 -1. 6012111429916651E-04 1. 0435120876530314E-03  
2. 5913361063598366E-04 -3. 3059239671904249E-04 1. 7718846861325492E-04  
7. 5386117036566012E-06 8. 1685731894757234E-06 1. 8137118186613789E-04  
3. 2078709743977260E-05 3. 7646304049667447E-05 -2. 0423523100086488E-04  
2. 2769774499109788E-04 8. 6535191490554842E-05 2. 5913534788565905E-04  
1. 0224077424555911E-05 1. 7929209661438734E-04 2. 1572549726257543E-04  
-1. 7557410165124044E-04 -1. 0268628909247900E-04 5. 7520744186964017E-05  
-3. 5319731296003468E-05 1. 9379864187460760E-04 1. 2094708144069291E-04  
-1. 6866946269902359E-03 -1. 2385083464123829E-04 -2. 7943007850376013E-04  
-3. 4072039381392589E-04 -4. 7852765746370503E-04 -3. 7028218478723346E-04  
-3. 3625013181704471E-04 -1. 2661953013562264E-05 -1. 1752606995986948E-03  
-2. 4141637688334611E-04 -5. 1089249423330336E-04 3. 5188417712752907E-04  
7. 0972949299948030E-04 4. 4418115542205282E-06 5. 4532218973706915E-04  
1. 8602884251010313E-05 3. 1754005540490836E-04 5. 8065938522809560E-04

8. 2414686925995199E-05  
 5. 8919858748327753E-04  
 -1. 8459053152297764E-04  
 2. 9311960259554448E-04  
 -4. 0734667304227702E-04  
 -1. 2841407206668270E-05  
 1. 4365851301281190E-04  
 -1. 0155820363054518E-04  
 2. 1786955838505231E-03  
 -5. 9462264214199140E-06  
 9. 2485054558951994E-05  
 1. 1018682978339031E-03  
 -2. 8451059739424938E-04  
 -3. 6212642891495064E-04  
 5. 6225285671544774E-05  
 9. 1851415288258457E-04  
 4. 3429357193259204E-05  
 3. 4977252565469830E-04  
 4. 1389426978630375E-04  
 -1. 1543283134586532E-04  
 3. 8115494453306143E-06  
 2. 7300183771317805E-04  
 -7. 7081291149095309E-04  
 8. 4770182790203314E-04  
 -1. 2677933474882198E-03  
 -1. 6998030224034974E-03  
 -2. 6291554883730499E-04  
 3. 7652803504498162E-04  
 7. 0385305004047518E-04  
 4. 4769095700331328E-04  
 2. 3480397213928530E-05  
 6. 5877787111658152E-05  
 -8. 8928159716850883E-05  
 -1. 3954394482336324E-04  
 6. 4018707941016365E-05  
 4. 7618042443549513E-05  
 -7. 2738364153917406E-04  
 4. 2696117608993761E-04  
 3. 1611146694314268E-05  
 -2. 8454895059885817E-04  
 8. 0442305645434811E-04  
 4. 2067732167166483E-04  
 2. 8522274787331033E-04  
 3. 9742962770357269E-04  
 -1. 4433777223780018E-04  
 1. 6831774593935176E-04  
 -2. 1476232741614621E-04  
 2. 7266068441365778E-04  
 1. 2493716014047072E-04  
 8. 0545370776775326E-05  
 8. 8809093247875116E-05  
 6. 2804218257027356E-04  
 -1. 5013886063970649E-04  
 1. 2311971316849933E-03  
 1. 1928742367183544E-03  
 -9. 9741031079811208E-04  
 2. 3177565633277083E-04  
 -7. 1335091243253151E-04  
 -1. 8200745627693836E-04  
 -2. 9274515612326554E-04  
 4. 5598796130849782E-05  
 1. 2008236722849758E-04  
 -1. 3593040729652415E-04  
 -4. 0443430993805234E-04  
 7. 4822421003820387E-04  
 -2. 4917881657293380E-04  
 -5. 2542992605754358E-04  
 2. 2823505809189360E-04  
 -4. 9411069930296685E-04  
 6. 0563546523820786E-04  
 1. 2810401177867749E-03  
 1. 5653427149206493E-03  
 1. 0115268404738048E-04  
 4. 0473511428890418E-05  
 -9. 2509446515580136E-04  
 2. 4586082258677548E-04  
 1. 0702905267705133E-04  
 -4. 4288366635278547E-05  
 -2. 8016812176286110E-04  
 -3. 1727343055236694E-05  
 2. 9138200804594830E-05  
 -4. 3493599722042072E-04  
 7. 0537612261469256E-04  
 -4. 2398727514796341E-04  
 5. 1237734613075248E-04  
 4. 4616791099606453E-04  
 1. 1523470922647416E-03  
 -1. 1407253814410614E-03  
 -1. 7515900551454242E-03  
 -3. 8718173452986429E-04  
 1. 6596823197450870E-04  
 -6. 2302629548615645E-05  
 1. 1297718488617159E-05  
 -2. 0687504290944483E-05  
 -1. 0529519408879285E-04  
 2. 5217871158919849E-05  
 2. 3749374559851877E-04  
 8. 8947528604654434E-04  
 6. 4189429484433542E-04  
 4. 8225553386562332E-04  
 8. 3953938747002052E-04  
 1. 3528919645346815E-03  
 6. 6875430139955909E-04  
 -4. 2736205752494285E-05  
 -3. 7938723626826387E-04  
 -1. 8217424287247534E-04  
 -6. 7668266200694087E-05  
 -2. 3882873124451382E-04  
 -9. 1208309566827615E-05  
 -2. 6032507830171998E-04  
 -3. 1706715791153506E-04  
 9. 5440410855942374E-05  
 5. 0438972713770492E-04  
 2. 3297592311806293E-04  
 8. 5723348237052590E-04  
 8. 3594353105020318E-04  
 -2. 3784422337021842E-04  
 -5. 1706798384845156E-04  
 6. 3380532848630677E-05  
 7. 3766177545203269E-05  
 1. 2040645982392647E-04  
 1. 9012705334422862E-04  
 -2. 3341888922308207E-04  
 -1. 0716462334473028E-04  
 2. 5417201010491267E-04  
 -4. 0645427262373646E-04  
 -4. 7961778308338951E-05  
 -6. 6837685070380385E-05  
 7. 1997483884822674E-04  
 9. 3362284083206364E-04  
 9. 2191274738094694E-04  
 9. 1752349744310293E-04  
 1. 1317497736103520E-04  
 -1. 1862906551961997E-05  
 3. 2513937673039477E-04  
 4. 2051533941858573E-04  
 2. 1407542963876896E-04  
 -3. 2760309260732419E-04  
 5. 0765554372401381E-04  
 1. 2219982382839444E-03  
 7. 5943308218568751E-04  
 3. 1563196737803280E-04  
 -1. 5049386662062351E-03  
 -2. 0824310292997246E-03  
 -2. 9341464542417773E-04  
 -3. 7752002258271305E-04  
 -3. 5677353397396867E-05  
 -1. 9914465813945749E-04  
 7. 7840783038845035E-06  
 -6. 6904705456489598E-04  
 2. 4476648454464567E-04  
 -7. 8544475110939224E-05  
 -2. 7697638081321995E-04  
 1. 7274756005962368E-04  
 -1. 9661338536636092E-04  
 1. 3876014593207757E-04  
 -8. 3796094264133717E-04  
 -1. 7470407993917134E-05  
 5. 9148158203968125E-04  
 6. 4348405431086597E-04  
 1. 0371356149442539E-03  
 -1. 8839601298478155E-03  
 1. 0434922103593829E-03  
 -2. 9112358781668157E-04  
 5. 3887095031455633E-05  
 -2. 1052701992456039E-04  
 -4. 7619186905999508E-04  
 -2. 4186022097898440E-04  
 9. 7309809362106564E-05  
 2. 8682255301137812E-04  
 -6. 9864362655529038E-04  
 -3. 4740951206212807E-04  
 -2. 8119297779835605E-04  
 -4. 2546099759395667E-04  
 -2. 0590500365196118E-04  
 2. 5781680665654160E-04  
 3. 7183751960258803E-05  
 1. 1262559593855488E-05  
 7. 1348328984724129E-05  
 5. 0942422114751270E-04  
 5. 1011756127077956E-04  
 1. 8799315595482058E-04  
 -1. 0055546264775644E-04  
 2. 8681879190915977E-04  
 8. 2661325170706613E-04  
 -1. 6170214395334223E-04  
 -1. 0483437130551046E-04  
 -3. 0168079247462192E-04  
 3. 6411377373110619E-05  
 -4. 3315700795752221E-04  
 1. 0066799153989820E-03  
 1. 1246502651671011E-04  
 -1. 5640620501061023E-04  
 -1. 6514538136115853E-04  
 7. 4213194999066118E-05  
 1. 6301197984650828E-05  
 1. 5331009200635485E-04  
 1. 0996014793530943E-04  
 -2. 3099728952657563E-04  
 1. 3324055241591948E-03  
 -4. 4659938734940114E-04  
 8. 7546180938404374E-04  
 6. 344227767049597E-04  
 -8. 1639153496964776E-04  
 1. 0934557574349959E-03  
 -7. 9874024179947599E-04  
 4. 1704375702655968E-04  
 -2. 2140988634723676E-04  
 2. 7740034138559917E-04  
 -5. 4420386564533324E-04  
 2. 7019499315900596E-04  
 1. 6529234779080491E-04  
 -1. 0260923595404995E-04  
 -1. 4411835023392120E-04  
 1. 6193868431427065E-04  
 6. 0645440488788849E-04  
 4. 5889915583261496E-03  
 -1. 7966021406502976E-04  
 1. 8647433425685509E-03  
 -2. 6496940523473107E-04  
 2. 7385078643370550E-04  
 2. 2579503817299823E-04



-3.3975359501499424E-04 1.8721635451140027E-04 1.7034725418597411E-04  
-5.6383972194413703E-05 1.8249715953054234E-04 3.2534448629389061E-04  
2.5795073588539712E-04 5.6727854402784567E-05 -4.7488168553512920E-05  
-1.7785028182493211E-05 -1.5623159883973129E-05 9.2281989421037552E-05  
1.5186828760561044E-06 -1.0713219326127094E-03 -1.8879017997808822E-04  
-3.4629930553693852E-04 -2.2504202533513477E-04 -2.4164981610404445E-04  
-5.9326510004604094E-04 -1.3277592279911780E-03 2.3904681808827876E-04  
1.0142642432432660E-03 4.3433270049212785E-04 -5.2064618443161325E-04  
-7.9509355098610101E-04 6.1859925314766999E-04 -4.8779357844991196E-05  
-5.1400017663269157E-04 1.6267003790188224E-03 6.0277536770757863E-04  
-2.0107590753999541E-03 2.7587708197938465E-04 7.0637960356827320E-04  
4.5677410753670406E-04 1.0269148549417802E-04 9.9337154635123904E-04  
2.6889385887166902E-06 -2.4339575433719604E-05 3.2183555635528012E-05  
-2.1795273646048506E-05 1.6074092583229579E-04 2.0257859691757429E-04  
2.1952454253917290E-04 1.4426963523986810E-04 -1.6298683512968920E-04  
1.6835403577182206E-04 9.0169862401219336E-05 -2.1006053226933327E-05  
1.3068906890815885E-04 2.0685531269892728E-04 -1.3789583934793037E-04  
-1.8879994315239998E-04 2.7770144463323712E-04 -2.4836037192039638E-04  
-3.8305950428252410E-05 9.5159921438088182E-06 -4.7149879998869594E-04  
1.1761533987774467E-03 3.0484769794748314E-04 4.5317168348999246E-04  
1.1539994828562476E-03 1.3952430569457621E-03 1.8876100103246017E-03  
5.2369929834150143E-04 3.7310037745960737E-04 -1.0966819713973820E-03  
2.1984182996095421E-04 2.1026694209744953E-04 8.8931135681956537E-04  
1.0062106421605914E-03 3.0296519773117544E-04 -1.7910933628460302E-04  
-8.0265424917126135E-05 7.3730145238354240E-04 -2.7571551068225760E-04  
1.1478662235992810E-03 -1.2452398594885515E-03 -3.3198242080699920E-04  
-5.1864643431777067E-05 -6.7184361998640359E-05 -1.3287257463102185E-05  
-2.3966327286236040E-05 2.6214097129549586E-04 5.7653924468170444E-05  
-6.4137017958362620E-05 -7.5627553036426332E-05 -1.8460854085913794E-04  
6.1552976980157676E-04 6.8423607421967358E-05 -2.3802448856865687E-04  
3.6773675262222666E-05 9.0250615417845643E-05 -3.7573729468201892E-04  
-1.7359446992342901E-05 -4.3397045322327732E-04 2.8464610350740425E-04  
-7.7188740727058408E-04 -6.3531824849128403E-04 7.1025069503381658E-04  
-5.9580190988304876E-04 4.3474566996199333E-04 -8.6634387971096997E-04  
8.3338852661704794E-04 3.0385809570939804E-04 -2.7421173556448270E-04  
4.9671359191730345E-04 5.8958943076059815E-04 9.2659086121736926E-04  
1.4337547302812005E-03 4.7206878107723324E-04 7.6482529566499337E-04  
1.5311143518879011E-04 -1.0930860998581379E-03 1.0782319947347780E-05  
-2.6121443329638164E-04 5.4758147430572289E-06 2.5425408944664235E-04  
-6.4426915723895525E-05 -9.1659417934447521E-04 3.2098330450819329E-04  
-1.0111002185074317E-04 -9.4262159798770624E-05 -5.5549208817861060E-05  
2.4568470440139835E-04 3.3942737879356477E-04 -1.0575143369090742E-05  
2.9965193146098452E-05 4.5052986212580556E-04 -6.7033569990659157E-05  
-1.0069052583726708E-04 -2.0803706735896953E-04 -1.7347802436107584E-04  
1.2401272392483046E-04 5.9501904055729528E-05 2.1974674096636961E-04  
3.6548200966052724E-04 -1.9628413339278767E-04 -4.9155242322381744E-05  
6.4352107638096870E-04 -5.8078756445182234E-04 1.2270997647137241E-03  
8.7490439346481815E-04 1.4264634086712741E-03 7.6100636431609124E-04  
-6.3788336162974037E-04 -2.9453884518229898E-05 2.1924887656247133E-05  
-7.5777482734749120E-04 -1.3539483302593002E-03 -6.9656965250685288E-04  
-5.1001310209666242E-04 -4.3505308553278905E-04 7.9354591755202524E-04  
-3.5088341502802613E-05 -4.3971968067698004E-04 -3.9439666881631264E-04  
7.3759097396428378E-04 -1.6838797997443839E-04 -2.8482078686972918E-04  
3.4590337235574113E-04 -4.6952580689061150E-04 -1.5191514354336375E-03  
-1.6024732812742817E-04 1.6430181997100440E-04 -3.6096470861972027E-04  
-2.6705062563936581E-05 2.0520252288422093E-04 -2.9850002579568741E-04  
-1.4392456560785862E-04 -1.3960487001566800E-04 -1.7820886154820664E-05  
1.5662375247193152E-04 -2.3728423905803339E-04 7.0364565751644879E-05  
-2.8493464987085508E-04 4.9830215005576930E-04 9.4405998583330610E-05  
-1.4766652763907893E-04 3.0389900702565415E-04 -6.2955630313137441E-05  
-6.6693687232213610E-04 8.1504697775228196E-04 -8.6738131399455840E-04  
-4.6721729231607220E-04 -9.8269182185473891E-05 5.9357281561210574E-04  
6.4620279542987715E-04 -1.7818967569560048E-04 -6.1800801902082059E-04  
8.4944919156867808E-04 -8.7821383969194800E-04 -8.9571854716583910E-04  
4.6821190459642907E-04 4.6944848310400756E-04 -7.6658952059463557E-05  
1.2607324745850742E-04 -1.8817262328046579E-03 5.4353871169939504E-04  
-1.4577871990686424E-04 -8.8725542852839689E-04 -4.0681951006870174E-04  
6.2274448437524624E-04 -8.2260336035706627E-05 -1.3167657051705068E-04  
-1.8742473024282566E-05 -8.8304583334156980E-05 -4.1219272727400477E-05  
-1.6462859047679471E-04 4.6685117459487752E-04 -1.6655671940515407E-04  
-4.8758617065247536E-04 3.8477835335454951E-04 -9.0572050083191466E-06  
-5.7756973306794088E-04 4.2556650898975056E-05 2.5533774642473089E-05  
-1.0031824315678255E-04 -4.8187297488289161E-05 -2.0737932136080057E-04  
-3.9568847006989713E-07 -1.0858382925148504E-04 1.3168106326114497E-04

```

-4.3907535953133123E-04  1.1189679252072303E-03  -2.4959701808491112E-04
-2.2026923281055761E-03  1.5809350221960403E-04  1.9363839696221548E-04
-1.7846031722683388E-04  1.9194059049262488E-04  -1.4306758765853225E-03
  7.2180580667426662E-04  -4.8928342795053327E-04  -8.7231290024341733E-04
-5.3823537510427606E-04  9.1421096690047152E-04  1.7589364095665910E-05
  7.9627400796006222E-04  6.0256304846780385E-04  -9.2774299162260690E-04
-4.0050303242478472E-04  8.8114914058498594E-04  -3.8148340578504587E-04
-3.1824587096361328E-04  1.2455758611055780E-03  8.3476353023368983E-04
-2.9490952489107249E-04  -2.1000876682420356E-05  6.5703490708621228E-06
  1.3764657231344908E-04  1.7587174231108746E-04  1.2057772411085433E-05
  1.2085237658231235E-04  -1.5707875953720429E-04  2.2379830522207595E-04
  4.2486509044342282E-05  -2.2017812349578434E-04  -2.0075249397101693E-04
-7.9421161078126231E-05  3.4181879592786683E-04  1.6947803516174174E-04
-1.8585983818280310E-05  -2.4743553157080870E-04  1.4921378687691897E-04
-2.3088746530313434E-05  7.6599634387364648E-04  2.1219700557493446E-04
  7.489773538890934E-04  -8.0091994093238711E-04  2.3108352108696756E-04
  1.6932432279180593E-03  1.5551146113696821E-04  -5.3125547853881861E-04
-7.4843341981802405E-04  -7.1434919561523980E-04  9.3661887355076326E-04
  2.9663025204268147E-04  -6.7344980146204398E-04  7.2130935530886496E-04
-1.1729054802603477E-03  6.9691166047209827E-04  -9.4045406880363907E-04
  8.8829472363754732E-04  1.7243035803579238E-03  5.0587003717153729E-04
-1.5380771613524582E-03  -9.8087782418758472E-04  -5.0064312510480038E-04
-5.1904102437950120E-05  1.1268390738350033E-04  -2.2992703268327188E-04
  3.6342521974382898E-05  -2.4956340538351637E-04  2.4670536857320852E-05
-2.6591585314654167E-04  5.8642095690777288E-05  -1.0842346336186052E-06
-4.4260803854326926E-04  -1.0728158337224230E-04  4.1120616570638157E-04
  1.7113453444784108E-04  2.7790816369109328E-04  -1.1424720199465002E-04
  7.7477224251332737E-06  -1.2192104176946091E-04  -1.9151872658984017E-04
  2.1905991947809093E-04  3.4007393187897604E-04  -4.8977714784606378E-04
-9.8892756132051840E-04  -1.4222351079153147E-03  3.4850771246127559E-04
-1.3102008283699437E-04  2.1423344100511449E-04  2.2919822740349448E-04
  5.4843876376746675E-04  -1.9625598030537667E-04  -4.6968018664555696E-04
-1.8577505863114706E-04  4.1801866397457604E-04  -3.4361323624594852E-04

&END VELOCITY
&KIND C
  BASIS_SET DZVP-MOLOPT-SR-GTH
  POTENTIAL GTH-PBE-q4
  &POTENTIAL
2 2
0.338471240000000E+00 2 -0.8803673979999999E+01 0.133921085000000E+01
2
0.302575750000000E+00 1 0.9622486650000001E+01
0.291506940000000E+00 0
  &END POTENTIAL
&END KIND
&KIND O
  BASIS_SET DZVP-MOLOPT-SR-GTH
  POTENTIAL GTH-PBE-q6
  &POTENTIAL
2 4
0.244554300000000E+00 2 -0.166672148000000E+02 0.248731132000000E+01
2
0.220955920000000E+00 1 0.183374581100000E+02
0.211332470000000E+00 0
  &END POTENTIAL
&END KIND
&KIND H
  BASIS_SET DZVP-MOLOPT-SR-GTH
  POTENTIAL GTH-PBE-q1
  &POTENTIAL
1
0.200000000000000E+00 2 -0.417890044000000E+01 0.724463310000000E+00
0
  &END POTENTIAL
&END KIND
&KIND Rh
  BASIS_SET DZVP-MOLOPT-SR-GTH
  POTENTIAL GTH-PBE-q17
  &POTENTIAL
3 6 8
0.420000000000000E+00 2 0.262067934000000E+02 -0.493738335000000E+01
3
0.345446220000000E+00 2 -0.452482320000000E+00 0.389280438000000E+01
-0.502558885000000E+01

```

```

0.3783801400000000E+00 2 -0.9411124199999999E+00 -0.5699310000000000E-02
0.6743510000000000E-02
0.4337472500000000E+00 2 0.1574236220000000E+01 -0.3012171700000000E+01
0.3415481660000000E+01
&END POTENTIAL
&END KIND
&KIND B
BASIS_SET DZVP-MOLOPT-SR-GTH
POTENTIAL GTH-PBE-q3
&POTENTIAL

2 1
0.4189914500000000E+00 2 -0.5859461710000000E+01 0.9037564300000001E+00
2
0.3713204600000000E+00 1 0.6297280180000000E+01
0.3645630800000000E+00 0
&END POTENTIAL
&END KIND
&TOPOLOGY
NUMBER_OF_ATOMS 773
MULTIPLE_UNIT_CELL 1 1 1
&END TOPOLOGY
&END SUBSYS
&END FORCE_EVAL

```

---

To carry out WTMetaD simulations, take the appropriate restart file generated by CP2K (usually named MD-1.restart for the current file and MD-XXXX.restart for the earlier XXXX-th step) and insert the “&FREE ENERGY” section after “&END MD” line and “&COLVAR” section at the very end after “&END TOPOLOGY”. These sections for **M1**, **M2** and **M3** are given below.

### Simulation M1

---

```

&FREE_ENERGY
&METADYN
NT_HILLS 100
MIN_DISP -1.0000000000000001E-01
WW 1.0000000000000000E-02
DO_HILLS T
WELL_TEMPERED T
DELTA_T 7.500000000000000E+02
&METAVAR
SCALE 1.0000000000000001E-01
COLVAR 1
&END METAVAR
&PRINT
&COLVAR SILENT
COMMON_ITERATION_LEVELS 3
&EACH
MD 1
&END EACH
&END COLVAR
&END PRINT
&END METADYN
&END FREE_ENERGY

&COLVAR
&COORDINATION
ATOMS_FROM 56
ATOMS_TO 69
R0 7.099999999999999E+00
&END COORDINATION
&END COLVAR

```

---

### Simulation M2

---

```

&FREE_ENERGY
&METADYN
NT_HILLS 100
MIN_DISP -1.0000000000000001E-01
WW 1.0000000000000000E-02
DO_HILLS T
WELL_TEMPERED T
DELTA_T 7.500000000000000E+02

```

```

&METAVAR
  SCALE 1.0000000000000001E-01
  COLVAR 1
&END METAVAR
&PRINT
  &COLVAR SILENT
  COMMON_ITERATION_LEVELS 3
  &EACH
    MD 1
  &END EACH
&END COLVAR
&END PRINT
&END METADYN
&END FREE_ENERGY

```

```

&COLVAR
  &COORDINATION
  ATOMS_FROM 56
  ATOMS_TO 75
  R0 7.0999999999999996E+00
&END COORDINATION
&END COLVAR

```

---

### Simulation M3

```

&FREE_ENERGY
  &METADYN
  NT_HILLS 100
  MIN_DISP -1.0000000000000001E-01
  WW 1.0000000000000000E-02
  DO_HILLS T
  WELL_TEMPERED T
  DELTA_T 7.500000000000000E+02
  &METAVAR
  SCALE 1.0000000000000001E-01
  COLVAR 1
&END METAVAR
  &METAVAR
  SCALE 1.0000000000000001E-01
  COLVAR 2
&END METAVAR
  &PRINT
  &COLVAR SILENT
  COMMON_ITERATION_LEVELS 3
  &EACH
    MD 1
  &END EACH
&END COLVAR
  &HILLS SILENT
  COMMON_ITERATION_LEVELS 3
  &EACH
    MD 1
  &END EACH
&END HILLS
&END PRINT
&END METADYN
&END FREE_ENERGY

```

```

&COLVAR
  &COORDINATION
  ATOMS_FROM 56
  ATOMS_TO 73
  R0 9.6600000000000001E+00
&END COORDINATION
&END COLVAR
  &COLVAR
  &COORDINATION
  ATOMS_FROM 56
  ATOMS_TO 67
  R0 8.1600000000000001E+00
&END COORDINATION
&END COLVAR

```

---

### 3. Temperature and potential energy plots over the BOMD trajectories

Simulation S1

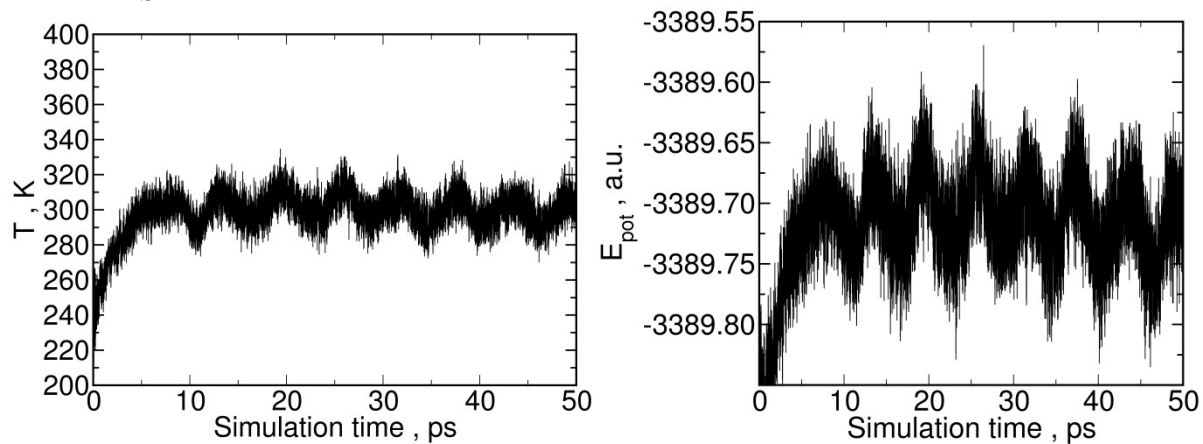

Simulation S2

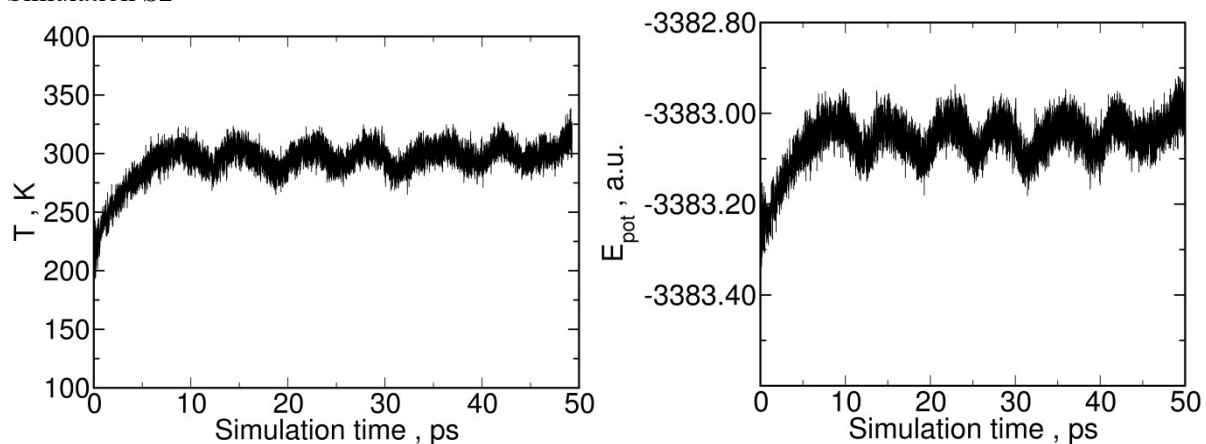

Simulation S3

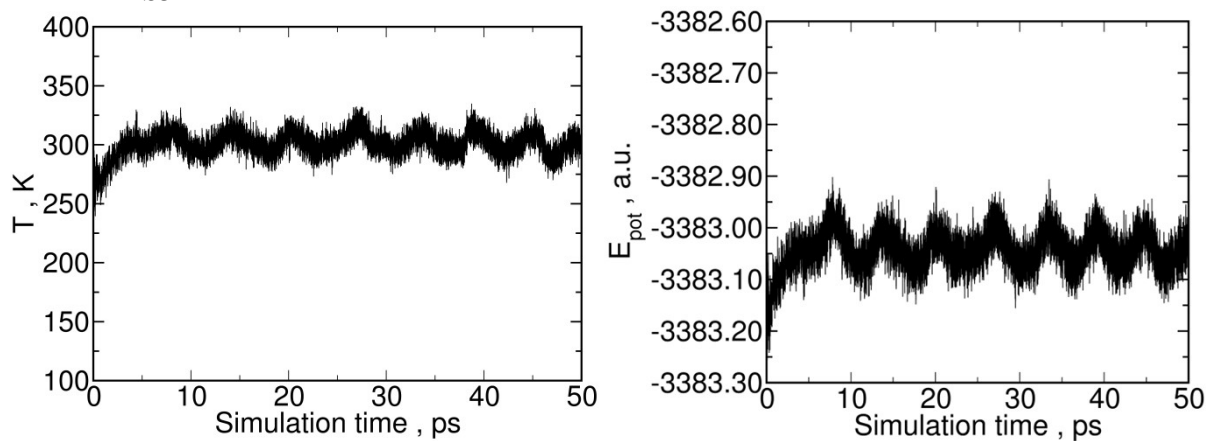

**Figure S1.** Plots of temperature (left) and potential energy (right) over BOMD simulations S1-3.

#### 4. Single-CV well-tempered metadynamics results

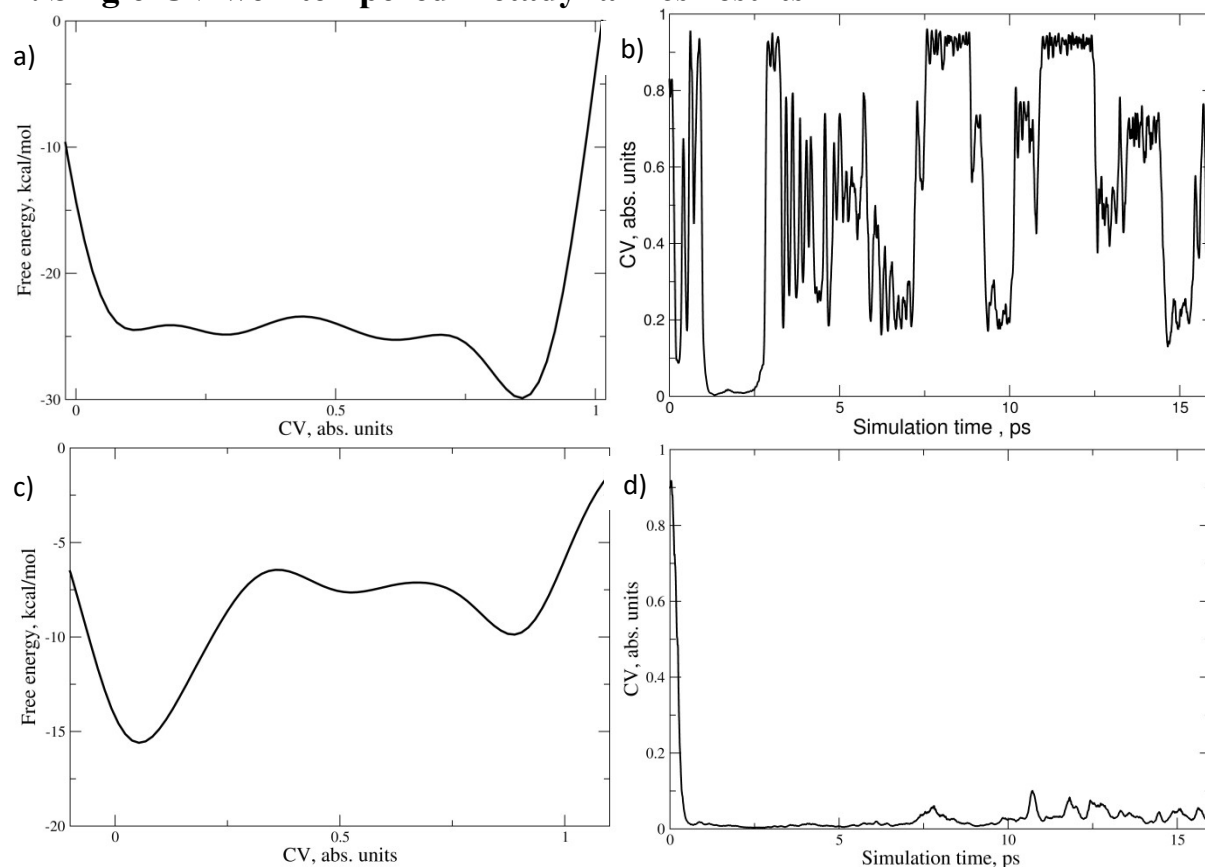

**Figure S2.** WTMetaD simulations **M1** (a: Free energy/CV (FES) plot; b: CV/time plot) and **M2** (c: Free energy/CV (FES) plot; d: CV/time plot).

#### 5. Well-tempered metadynamics – convergence assessment

a) Hills magnitude and convergence. The hill magnitude in kcal mol<sup>-1</sup> is plotted against the hill number. At deposition rate of 100 steps, for 16 ps or 32000 steps, hills with variable height were deposited 320 times. At the end of the simulation, the hill height is very close to 0, indicating convergence of the value of the total energy deposited and the barrier height.

WTMetaD simulation **M1**

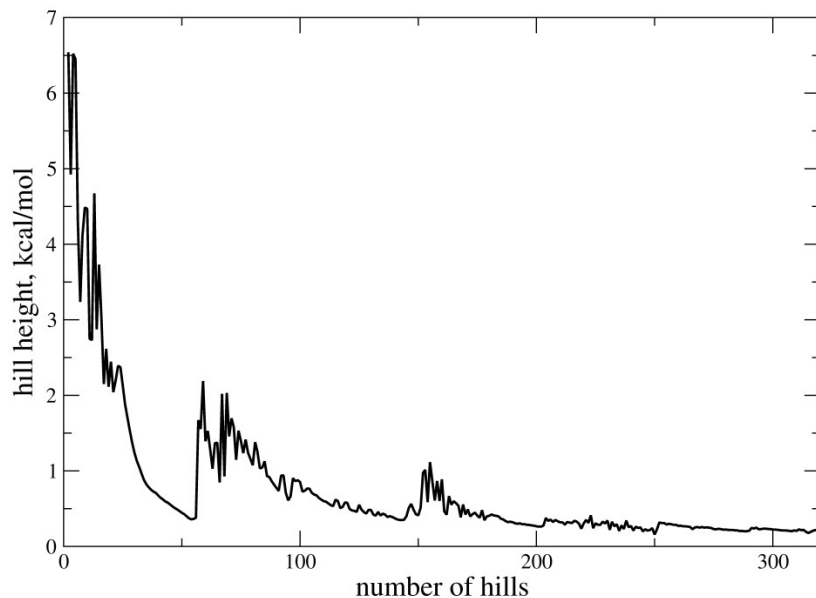

WTMetaD simulation **M2**

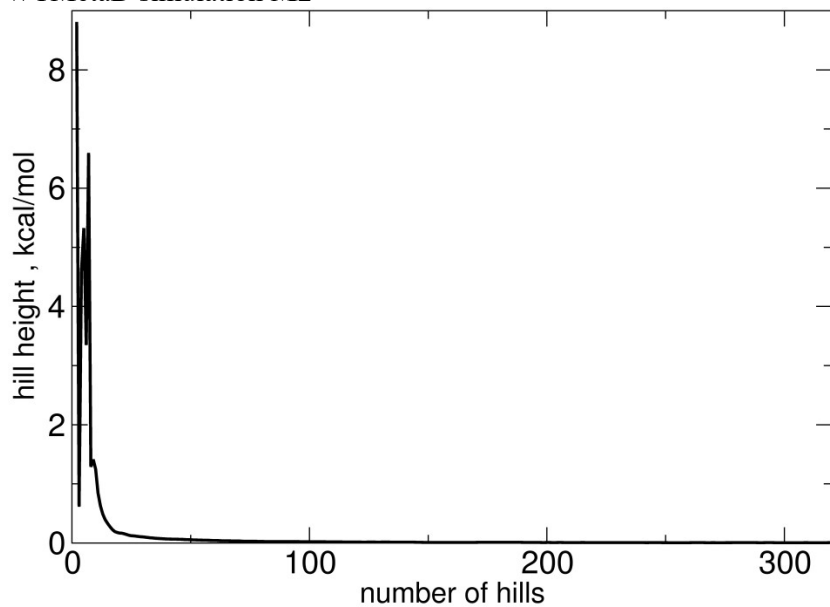

WTMetaD simulation **M3**

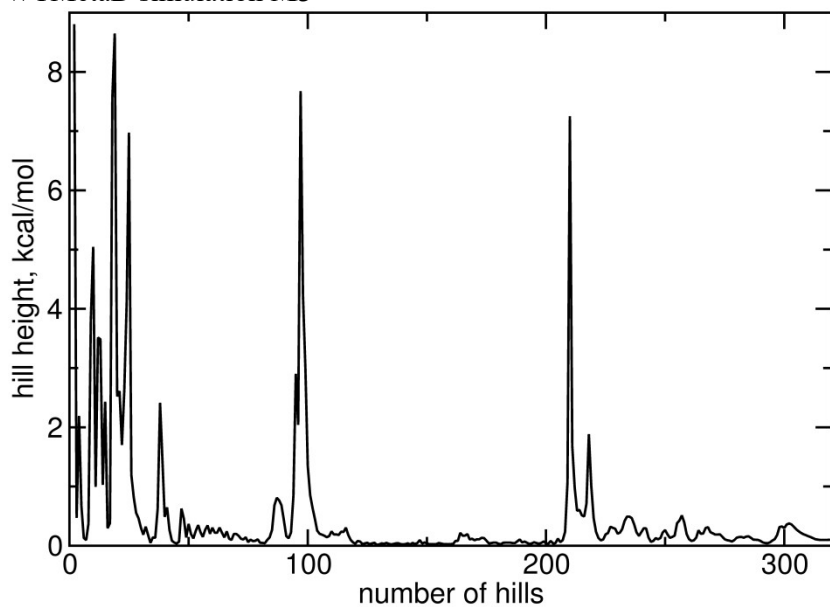

**Figure S3.** Magnitude of the deposited hills during WTMetaD simulations **M1-3**.

b) FES plots at selected timepoints. The FES was generated from the respective restart files starting at 2 ps to 18 ps spaced by 2 ps. These plots track the evolution of the FES with time. In the case of H<sub>2</sub>O-containing systems (**M1**, **M3**) due to the high mobility of H<sub>2</sub>O and the very flat nature of the FES exhibiting a multitude of shallow minima, the dissociated states diverge quite significantly from one another. The H-bonded state, being more geometrically well-defined and constrained generally assumes the final curve shape at earlier time point.

WTMetaD simulation **M1**

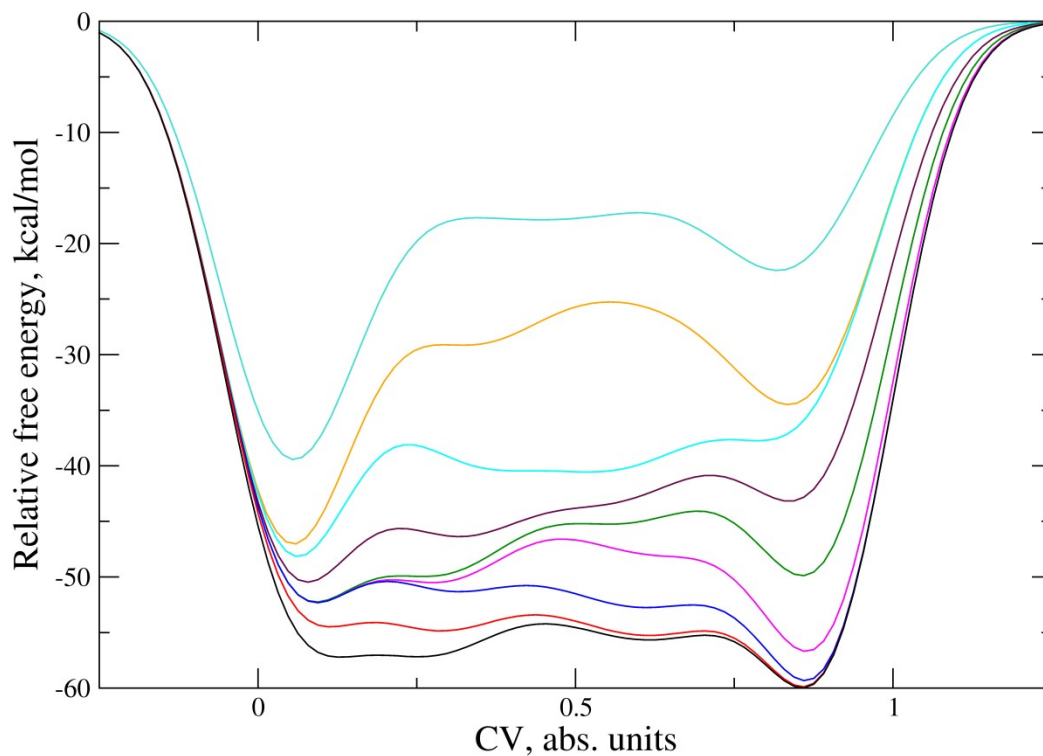

WTMetaD simulation **M2**

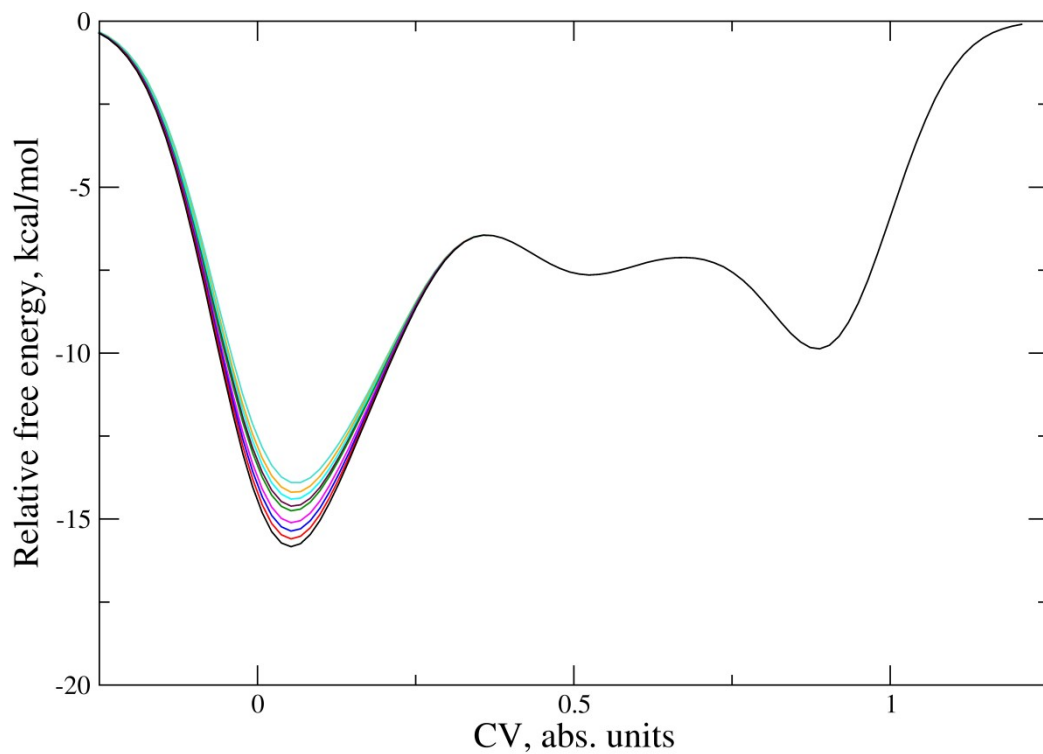



WTMetaD simulation **M3**: CV1

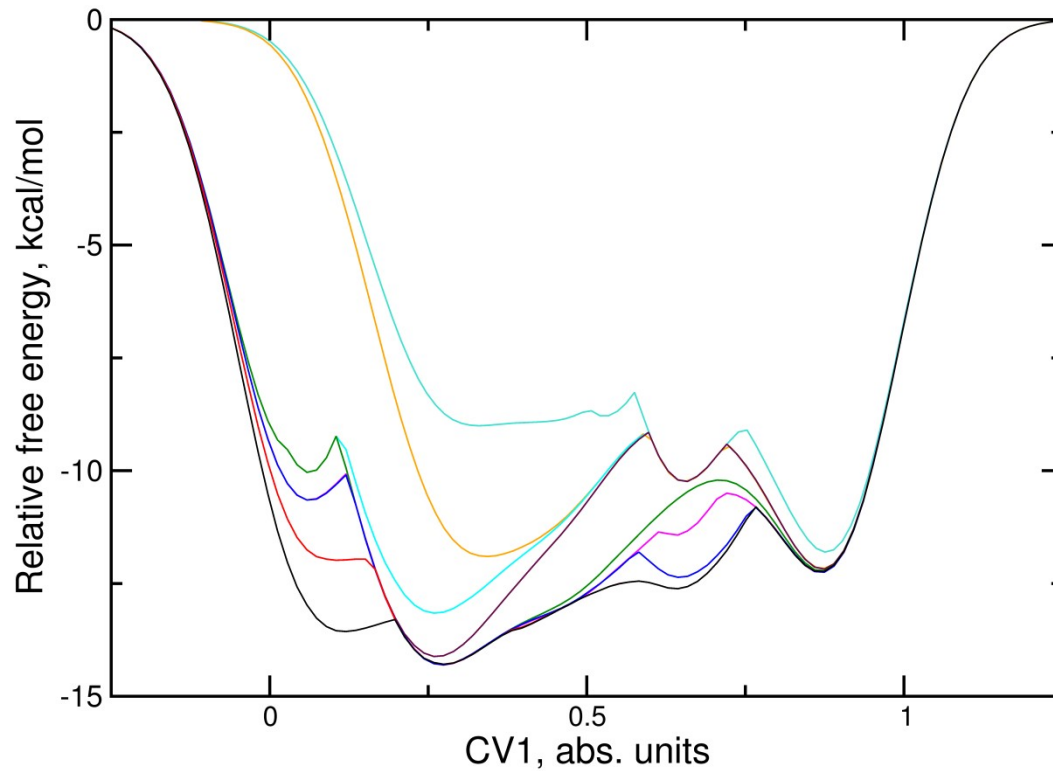

WTMetaD simulation **M3**: CV2

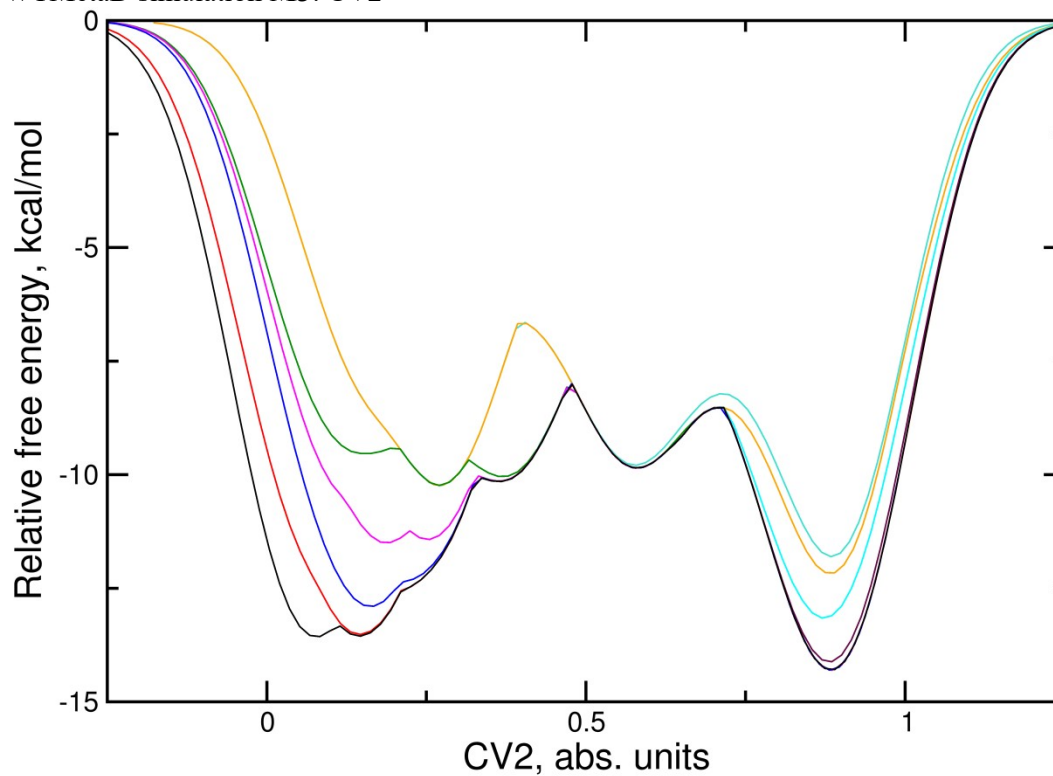

**Figure S4.** Evolution of FES from 2 ps (turquoise) to 18ps (black) at timepoints taken 2 ps apart during WTMetaD simulations **M1-3**.

## 6. Static DFT methods

All computations were executed on Gaussian 09 (revision A.02)<sup>12</sup> using default PBE0,<sup>4</sup> M06L,<sup>13</sup> M06,<sup>14</sup> and  $\omega$ B97xD<sup>15</sup> functionals and IEFPCM<sup>16</sup> and SMD<sup>17</sup> implicit solvation methods. DGDZVP basis set<sup>18</sup> was used as implemented in Gaussian09. Def2-TZVP basis set<sup>19</sup> was used as downloaded from Basis Set Exchange (<https://www.basissetexchange.org>). All structures were optimized at IEFPCM(1,4-dioxane, 303.15K)/PBE0/DGDZVP with cutoff values for Maximum Force = 0.001500, RMS Force = 0.001000, Maximum Displacement = 0.006000, RMS Displacement = 0.004000 for all Rh-containing species and cutoff values for Maximum Force = 0.000150, RMS Force = 0.000100, Maximum Displacement = 0.00600, RMS Displacement = 0.00400 for the others. In all cases, the predicted change in energy at the last optimization step was  $< 1 \times 10^{-6}$ . All stationary points were confirmed to reside in their respective PES minima by having only positive vibrational frequencies after frequency calculation at the optimization level of theory. Thereafter, single-point calculations at SMD/M06L/def2-TZVP, SMD/M06/def2-TZVP, and IEFPCM/ $\omega$ B97xD/def2-TZVP (solvent = 1,4-dioxane) were performed.

## 7. H-bond energies by static DFT calculations (extended results)

The initial H-bonded structures were derived from step 20 000 of simulations **S1** and **S2**, respectively, after solvent particles and distal water molecules were stripped and then subjected to structure optimization, frequency calculation, and higher level of theory single point calculations as described in section 6 above. The results show that O<sub>k</sub> in both **4a** and **4b** forms H-bonds in the optimized structures with the H-bond acceptors positioning themselves opposite the bulky chiral diene ligand (Figure S5). In **4a**, the 3 H<sub>2</sub>O molecules form an H-bonded cluster. The one that is closest to the carbonyl O atom serves as a lynchpin by participating in 3 H-bonds, once as acceptor and twice as donor (the structural optimization of internally H-bonded (H<sub>2</sub>O)<sub>3</sub> cluster without the ketone failed). The calculated DFT reaction energies and enthalpies ( $\Delta E$ ,  $\Delta H$ ; Table S1) were both negative but adding the entropy term ( $-T\Delta S$ ) to  $\Delta H$  caused the resultant Gibbs free energy ( $\Delta G$ ) to become positive due to  $\Delta H$  having smaller values. Thus, static DFT calculations on model systems in implicit solvation do not attain even qualitative agreement with the free energy calculated by the more sophisticated BOMD + WTMetaD simulations in full explicit solvent. Whereas the former predict both **4a** and **4b** to be unstable relative to **4** + 3H<sub>2</sub>O and **4** + H<sub>3</sub>BO<sub>3</sub>, respectively, the latter showed that the H-bonded state in the first case is more but in the second case less stable than the non-H-bonded state. DFT calculations also showed that H-bonding of uncomplexed 2-cyclohexenone with H<sub>3</sub>BO<sub>3</sub> and 3H<sub>2</sub>O (reactions 5 and 6) proceeded with about the same free energy as the complex (reactions 2 and 1). There was no improvement in reaction  $\Delta G$  (Table S1) after correction of the electronic energy at SMD/M06 or M06L/def2-TZVP

and IEFPCM// $\omega$ B97xD/def2-TZVP levels of theory even with these dispersion-corrected modern DFT functionals and a triple- $\zeta$  basis set specifically developed for calculating reaction energies.

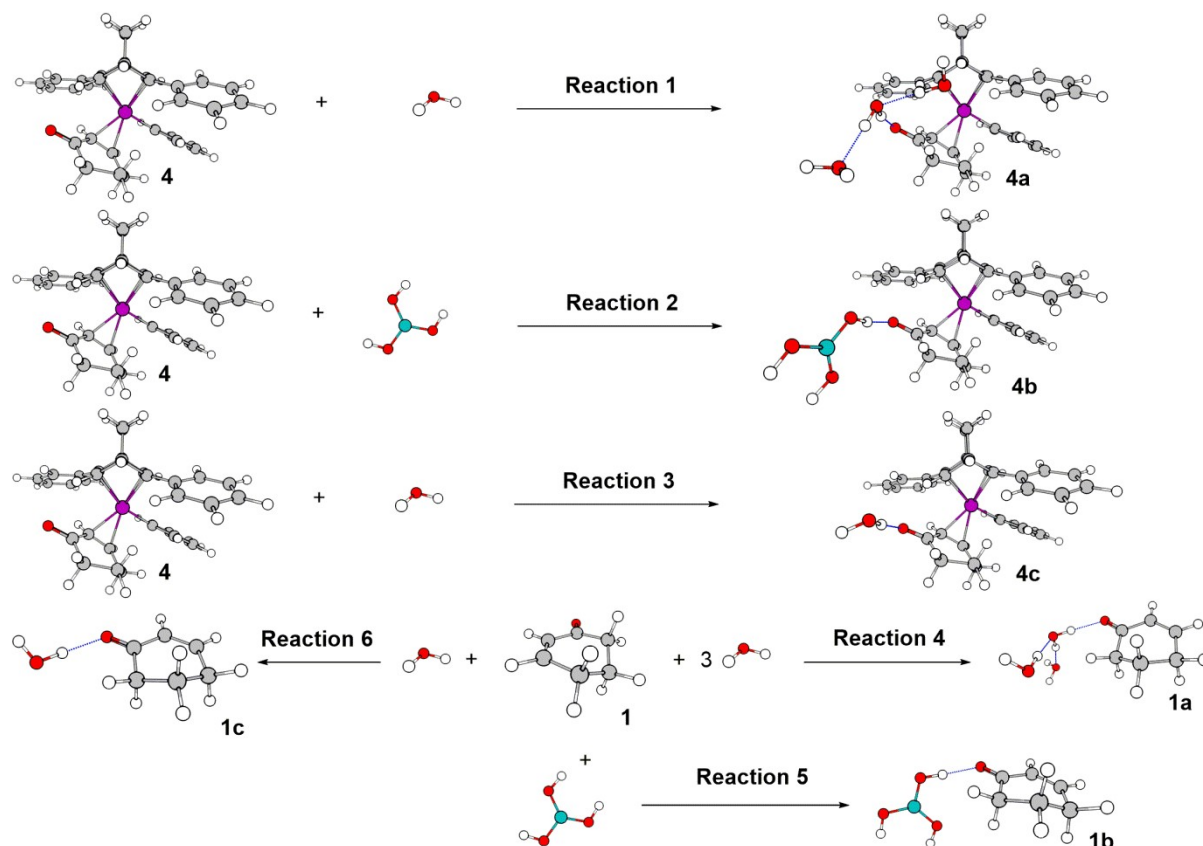

**Figure S5.** Model reaction equations 1-6 for evaluation of H-bonding energies (Table S1).

|                   | Reaction energy, kcal mol <sup>-1</sup> |              |              |                               |                               |                               |
|-------------------|-----------------------------------------|--------------|--------------|-------------------------------|-------------------------------|-------------------------------|
|                   | $\Delta E^1$                            | $\Delta H^1$ | $\Delta G^1$ | $\Delta G_{\text{corr}}(1)^2$ | $\Delta G_{\text{corr}}(2)^3$ | $\Delta G_{\text{corr}}(3)^4$ |
| <b>Reaction 1</b> | -23.0                                   | -18.0        | 8.2          | 10.4                          | 11.0                          | 8.1                           |
| <b>Reaction 2</b> | -7.3                                    | -6.1         | 2.3          | 2.3                           | 2.7                           | 1.4                           |
| <b>Reaction 3</b> | -6.8                                    | -5.2         | 1.8          | 2.0                           | 2.2                           | 1.5                           |
| <b>Reaction 4</b> | -21.0                                   | -15.9        | 8.1          | 11.0                          | 11.4                          | 9.1                           |
| <b>Reaction 5</b> | -6.6                                    | -5.2         | 4.0          | 3.7                           | 4.1                           | 3.2                           |
| <b>Reaction 6</b> | -6.4                                    | -4.8         | 2.8          | 3.1                           | 3.3                           | 2.6                           |

<sup>1</sup>at IEFPCM(1,4-dioxane, 303.15K)/PBE0/DGDZVP level of theory

<sup>2</sup>at SMD(1,4-dioxane)/M06L/def2-TZVP//IEFPCM(1,4-dioxane, 303.15K)/PBE0/DGDZVP level of theory

<sup>3</sup>at SMD(1,4-dioxane)/M06/def2-TZVP//IEFPCM(1,4-dioxane, 303.15K)/PBE0/DGDZVP level of theory

<sup>4</sup>at IEFPCM(1,4-dioxane)/ $\omega$ B97xD/def2-TZVP//IEFPCM(1,4-dioxane, 303.15K)/PBE0/DGDZVP level of theory

**Table S1.** Reaction energies for equations 1 - 6 (Figure S5) at different level of theory.

## 8. Cartesian coordinates, first 3 frequencies, electronic energies, enthalpies and Gibbs free energies for all DFT structures

### Complex 4

| Center Number | Atomic Number | Atomic Type | Coordinates (Angstroms) |           |           |
|---------------|---------------|-------------|-------------------------|-----------|-----------|
|               |               |             | X                       | Y         | Z         |
| 1             | 45            | 0           | -0.166185               | -0.324353 | -0.061371 |
| 2             | 6             | 0           | -1.813642               | 1.263833  | -0.322855 |
| 3             | 6             | 0           | -0.012791               | 2.313211  | 0.929366  |
| 4             | 6             | 0           | 2.876011                | 1.428011  | 1.590555  |
| 5             | 6             | 0           | -3.160894               | 0.721249  | -0.589750 |
| 6             | 6             | 0           | -4.175010               | 0.788906  | 0.376239  |
| 7             | 6             | 0           | -1.246781               | 1.439337  | 0.925873  |
| 8             | 6             | 0           | -1.011364               | 1.970497  | -1.408210 |
| 9             | 6             | 0           | -4.721235               | -0.400191 | -2.081100 |
| 10            | 6             | 0           | 5.166844                | 1.627061  | 0.851072  |
| 11            | 6             | 0           | -0.362314               | 3.692260  | 0.314237  |
| 12            | 6             | 0           | 0.382774                | 1.394598  | -1.266745 |
| 13            | 6             | 0           | -5.440533               | 0.269995  | 0.118265  |
| 14            | 6             | 0           | 0.960661                | 1.610306  | -0.010390 |
| 15            | 6             | 0           | 3.353758                | 1.809343  | -0.735952 |
| 16            | 6             | 0           | -3.456594               | 0.119659  | -1.823061 |
| 17            | 6             | 0           | -0.976979               | 3.485164  | -1.081916 |
| 18            | 6             | 0           | -5.720886               | -0.325369 | -1.111004 |
| 19            | 6             | 0           | 2.408183                | 1.608724  | 0.279607  |
| 20            | 6             | 0           | 4.716931                | 1.817574  | -0.454434 |
| 21            | 6             | 0           | 4.238114                | 1.431762  | 1.873753  |
| 22            | 1             | 0           | 2.167936                | 1.258496  | 2.397494  |
| 23            | 1             | 0           | 6.231090                | 1.633291  | 1.071074  |
| 24            | 1             | 0           | 3.020335                | 1.965240  | -1.757588 |
| 25            | 1             | 0           | 5.430603                | 1.975230  | -1.258848 |
| 26            | 1             | 0           | 4.576462                | 1.279760  | 2.895505  |
| 27            | 1             | 0           | -3.972124               | 1.250119  | 1.337654  |
| 28            | 1             | 0           | -4.926190               | -0.868757 | -3.040203 |
| 29            | 1             | 0           | -6.211648               | 0.333098  | 0.881442  |
| 30            | 1             | 0           | -2.681202               | 0.033302  | -2.580017 |
| 31            | 1             | 0           | -6.709898               | -0.728639 | -1.311573 |
| 32            | 1             | 0           | 0.393573                | 2.429300  | 1.934538  |
| 33            | 1             | 0           | -1.419491               | 1.796412  | -2.404192 |
| 34            | 1             | 0           | -1.061104               | 4.205649  | 0.982216  |
| 35            | 1             | 0           | 0.545496                | 4.302274  | 0.264558  |
| 36            | 1             | 0           | -0.390522               | 3.994967  | -1.852980 |
| 37            | 1             | 0           | -1.994891               | 3.884926  | -1.132854 |
| 38            | 1             | 0           | 0.968175                | 1.138202  | -2.144803 |
| 39            | 1             | 0           | -1.749028               | 1.163108  | 1.848257  |
| 40            | 6             | 0           | 1.288429                | -1.371925 | -1.098718 |
| 41            | 6             | 0           | 2.633694                | -1.493701 | -0.724361 |
| 42            | 6             | 0           | 0.927503                | -1.888470 | -2.356504 |
| 43            | 6             | 0           | 3.576299                | -2.093930 | -1.564791 |

|    |   |   |           |           |           |
|----|---|---|-----------|-----------|-----------|
| 44 | 1 | 0 | 2.969873  | -1.112652 | 0.238021  |
| 45 | 6 | 0 | 1.864659  | -2.481713 | -3.204765 |
| 46 | 1 | 0 | -0.108928 | -1.831057 | -2.689612 |
| 47 | 6 | 0 | 3.199594  | -2.588726 | -2.811908 |
| 48 | 1 | 0 | 4.612240  | -2.168838 | -1.239376 |
| 49 | 1 | 0 | 1.548763  | -2.865192 | -4.173300 |
| 50 | 1 | 0 | 3.932339  | -3.053820 | -3.466987 |
| 51 | 6 | 0 | -0.428724 | -2.522912 | 0.564149  |
| 52 | 6 | 0 | -1.449985 | -1.735206 | 1.087536  |
| 53 | 1 | 0 | -0.609838 | -3.042900 | -0.373879 |
| 54 | 1 | 0 | -2.400976 | -1.635254 | 0.567352  |
| 55 | 6 | 0 | -1.470716 | -1.369629 | 2.518458  |
| 56 | 8 | 0 | -2.427218 | -0.779115 | 3.016742  |
| 57 | 6 | 0 | -0.320181 | -1.837390 | 3.385335  |
| 58 | 1 | 0 | -0.157040 | -1.090569 | 4.167903  |
| 59 | 6 | 0 | 0.656953  | -3.083428 | 1.439691  |
| 60 | 6 | 0 | 0.955213  | -2.173870 | 2.622267  |
| 61 | 1 | 0 | -0.694209 | -2.736670 | 3.895898  |
| 62 | 1 | 0 | 1.415517  | -1.251030 | 2.247546  |
| 63 | 1 | 0 | 1.679922  | -2.645540 | 3.294969  |
| 64 | 1 | 0 | 0.311454  | -4.064855 | 1.800954  |
| 65 | 1 | 0 | 1.557439  | -3.268978 | 0.848948  |

```

-----
                1                2                3
                A                A                A
Frequencies --  24.7900          38.5193          39.9303
SCF Done:  E(RPBE1PBE) = -5999.08904453  A.U. after  1 cycles
                Conv g =   0.6309D-08          -V/T =  2.0047
Zero-point correction=                0.545455 (Hartree/Particle)
Thermal correction to Energy=                0.575734
Thermal correction to Enthalpy=                0.576694
Thermal correction to Gibbs Free Energy=                0.483204
Sum of electronic and zero-point Energies=                -5998.543590
Sum of electronic and thermal Energies=                -5998.513311
Sum of electronic and thermal Enthalpies=                -5998.512351
Sum of electronic and thermal Free Energies=                -5998.605840
SCF Done:  E(RM06L) = -1424.26367204  A.U. after  24 cycles
                Conv g =   0.6660D-08          -V/T =  2.0564
SCF Done:  E(RM06) = -1423.36288747  A.U. after  23 cycles
                Conv g =   0.4920D-08          -V/T =  2.0572
SCF Done:  E(RwB97XD) = -1423.95354902  A.U. after  25 cycles
                Conv g =   0.6705D-08          -V/T =  2.0572

```

## H<sub>2</sub>O

```

-----
Center   Atomic   Atomic   Coordinates (Angstroms)
Number   Number   Type      X           Y           Z
-----
   1         8         0      0.000000   0.000000   0.117139
   2         1         0      0.000000   0.767242  -0.468555
   3         1         0      0.000000  -0.767242  -0.468555

```

```

-----
                1                2                3
                A1                A1                B2
Frequencies -- 1686.5450          3820.9379          3953.8733
SCF Done: E(RPBE1PBE) = -76.3516415090  A.U. after 1 cycles
                Conv = 0.2157D-09          -V/T = 2.0095

Zero-point correction= 0.021555 (Hartree/Particle)
Thermal correction to Energy= 0.024437
Thermal correction to Enthalpy= 0.025397
Thermal correction to Gibbs Free Energy= 0.003544
Sum of electronic and zero-point Energies= -76.330087
Sum of electronic and thermal Energies= -76.327204
Sum of electronic and thermal Enthalpies= -76.326244
Sum of electronic and thermal Free Energies= -76.348098
SCF Done: E(RM06L) = -76.4474389288  A.U. after 9 cycles
                Conv = 0.6223D-09          -V/T = 2.0033
SCF Done: E(RM06) = -76.4263679514  A.U. after 8 cycles
                Conv = 0.5488D-08          -V/T = 2.0033
SCF Done: E(RwB97XD) = -76.4409290788  A.U. after 9 cycles
                Conv = 0.5875D-08          -V/T = 2.0040

```

#### Complex 4a

```

-----
Center   Atomic   Atomic   Coordinates (Angstroms)
Number   Number   Type     X           Y           Z
-----
  1       45       0       -0.154337  -0.667559  -0.317542
  2        6       0        1.303911  -1.343317   1.323110
  3        6       0        0.142970   0.616829   2.185284
  4        6       0       -2.272464   2.240004   1.232181
  5        6       0        2.435690  -2.156227   0.833189
  6        6       0        3.735722  -1.631582   0.784736
  7        6       0        1.255471   0.038293   1.342542
  8        6       0        0.170271  -1.951806   2.138533
  9        6       0        3.295978  -4.239950  -0.081028
 10       6       0       -4.679201   2.448845   1.372641
 11       6       0        0.272582   0.076342   3.632037
 12       6       0       -1.080902  -1.355946   1.522893
 13       6       0        4.796701  -2.396872   0.309434
 14       6       0       -1.133284   0.041395   1.584621
 15       6       0       -3.623353   0.305765   1.727499
 16       6       0        2.235560  -3.474784   0.395357
 17       6       0        0.303180  -1.462868   3.603069
 18       6       0        4.583275  -3.704559  -0.125056
 19       6       0       -2.355692   0.864404   1.506052
 20       6       0       -4.772443   1.087854   1.661438
 21       6       0       -3.423924   3.019191   1.159787
 22       1       0       -1.305577   2.711203   1.068123
 23       1       0       -5.576247   3.060543   1.320081
 24       1       0       -3.714038  -0.751649   1.957373
 25       1       0       -5.743638   0.632343   1.837060

```

|    |   |   |           |           |           |
|----|---|---|-----------|-----------|-----------|
| 26 | 1 | 0 | -3.337762 | 4.079890  | 0.937610  |
| 27 | 1 | 0 | 3.917662  | -0.615462 | 1.120754  |
| 28 | 1 | 0 | 3.116314  | -5.256149 | -0.422487 |
| 29 | 1 | 0 | 1.235308  | -3.900394 | 0.403107  |
| 30 | 1 | 0 | 5.412723  | -4.301737 | -0.494418 |
| 31 | 1 | 0 | 0.165171  | 1.706314  | 2.158275  |
| 32 | 1 | 0 | 1.187991  | 0.481822  | 4.074532  |
| 33 | 1 | 0 | -0.567231 | 0.447157  | 4.228771  |
| 34 | 1 | 0 | -0.519451 | -1.887548 | 4.187518  |
| 35 | 1 | 0 | 1.234903  | -1.851783 | 4.026829  |
| 36 | 1 | 0 | -1.961019 | -1.970107 | 1.357991  |
| 37 | 1 | 0 | 2.058509  | 0.666038  | 0.970292  |
| 38 | 6 | 0 | -1.917797 | -1.214366 | -1.265100 |
| 39 | 6 | 0 | -3.033764 | -0.388942 | -1.459501 |
| 40 | 6 | 0 | -2.055671 | -2.567147 | -1.625744 |
| 41 | 6 | 0 | -4.231629 | -0.887117 | -1.981108 |
| 42 | 1 | 0 | -2.983325 | 0.666816  | -1.200209 |
| 43 | 6 | 0 | -3.251331 | -3.073991 | -2.138994 |
| 44 | 1 | 0 | -1.213343 | -3.248967 | -1.507208 |
| 45 | 6 | 0 | -4.350391 | -2.233301 | -2.321006 |
| 46 | 1 | 0 | -5.076459 | -0.214253 | -2.116249 |
| 47 | 1 | 0 | -3.321476 | -4.127996 | -2.401945 |
| 48 | 1 | 0 | -5.282124 | -2.622001 | -2.725056 |
| 49 | 6 | 0 | 0.254503  | -0.437440 | -2.562112 |
| 50 | 6 | 0 | 1.415817  | -0.211373 | -1.823505 |
| 51 | 1 | 0 | 0.096622  | -1.432317 | -2.972709 |
| 52 | 1 | 0 | 2.138614  | -1.006702 | -1.651702 |
| 53 | 6 | 0 | 1.906133  | 1.154421  | -1.599182 |
| 54 | 8 | 0 | 2.997646  | 1.356573  | -1.050421 |
| 55 | 6 | 0 | 1.101409  | 2.311783  | -2.144220 |
| 56 | 1 | 0 | 1.190022  | 3.152622  | -1.450522 |
| 57 | 6 | 0 | -0.469672 | 0.689452  | -3.243989 |
| 58 | 6 | 0 | -0.352380 | 1.988624  | -2.462585 |
| 59 | 1 | 0 | -0.915628 | 1.890719  | -1.527266 |
| 60 | 1 | 0 | -0.801118 | 2.815880  | -3.022914 |
| 61 | 1 | 0 | -0.021367 | 0.808599  | -4.243090 |
| 62 | 1 | 0 | -1.516812 | 0.420119  | -3.401469 |
| 63 | 8 | 0 | 3.893428  | 5.916096  | -1.448873 |
| 64 | 8 | 0 | 0.709936  | 3.985087  | 1.365009  |
| 65 | 8 | 0 | 3.260655  | 3.791666  | 0.329974  |
| 66 | 1 | 0 | 3.343305  | 6.705995  | -1.355111 |
| 67 | 1 | 0 | 4.806270  | 6.226393  | -1.372971 |
| 68 | 1 | 0 | 0.792493  | 4.424802  | 2.221092  |
| 69 | 1 | 0 | 1.631990  | 3.927242  | 1.015738  |
| 70 | 1 | 0 | 3.477507  | 4.522669  | -0.282814 |
| 71 | 1 | 0 | 3.282898  | 2.972867  | -0.211344 |
| 72 | 1 | 0 | 5.795649  | -1.969638 | 0.281434  |
| 73 | 1 | 0 | 1.630003  | 2.613012  | -3.060618 |
| 74 | 1 | 0 | 0.162869  | -3.041261 | 2.089800  |

-----

|                         |                |            |          |
|-------------------------|----------------|------------|----------|
|                         | 1              | 2          | 3        |
|                         | A              | A          | A        |
| Frequencies --          | 13.3824        | 24.7685    | 27.5052  |
| SCF Done: E(RPBE1PBE) = | -6228.18062251 | A.U. after | 1 cycles |

```

          Conv g =    0.8343D-08          -V/T = 2.0049
Zero-point correction=                0.619860 (Hartree/Particle)
Thermal correction to Energy=          0.659959
Thermal correction to Enthalpy=        0.660919
Thermal correction to Gibbs Free Energy= 0.543497
Sum of electronic and zero-point Energies= -6227.560763
Sum of electronic and thermal Energies= -6227.520664
Sum of electronic and thermal Enthalpies= -6227.519704
Sum of electronic and thermal Free Energies= -6227.637126
SCF Done: E(RM06L) = -1653.63908696      A.U. after 24 cycles
          Conv g =    0.3245D-08          -V/T = 2.0487
SCF Done: E(RM06) = -1652.67418380      A.U. after 23 cycles
          Conv g =    0.3114D-08          -V/T = 2.0494
SCF Done: E(RwB97XD) = -1653.31308111   A.U. after 26 cycles
          Conv g =    0.4209D-08          -V/T = 2.0495

```

### *H<sub>3</sub>BO<sub>3</sub>*

```

-----
Center   Atomic   Atomic   Coordinates (Angstroms)
Number   Number   Type      X           Y           Z
-----
      1         5         0      -0.008359   -0.029776    0.001869
      2         8         0       0.053191    1.349415   -0.000142
      3         8         0       1.075091   -0.873030   -0.000227
      4         1         0       1.923128   -0.415363   -0.001265
      5         8         0      -1.240364   -0.625256   -0.000355
      6         1         0       0.948673    1.707519   -0.001184
      7         1         0      -1.933360    0.047689   -0.001103
-----
                    1           2           3
                    A           A           A
Frequencies --   304.6954          445.1695          468.0771
SCF Done: E(RPBE1PBE) = -252.246651981   A.U. after 1 cycles
          Conv g =    0.4784D-09          -V/T = 2.0107
Zero-point correction=                0.048892 (Hartree/Particle)
Thermal correction to Energy=          0.053513
Thermal correction to Enthalpy=        0.054473
Thermal correction to Gibbs Free Energy= 0.021814
Sum of electronic and zero-point Energies= -252.197760
Sum of electronic and thermal Energies= -252.193139
Sum of electronic and thermal Enthalpies= -252.192179
Sum of electronic and thermal Free Energies= -252.224838
SCF Done: E(RM06L) = -252.559817676      A.U. after 11 cycles
          Conv g =    0.4020D-08          -V/T = 2.0037
SCF Done: E(RM06) = -252.488796521      A.U. after 10 cycles
          Conv g =    0.6535D-08          -V/T = 2.0039
SCF Done: E(RwB97XD) = -252.525558279   A.U. after 11 cycles
          Conv g =    0.8625D-08          -V/T = 2.0042

```

### *Complex 4b*



| Center<br>Number | Atomic<br>Number | Atomic<br>Type | Coordinates (Angstroms) |           |           |
|------------------|------------------|----------------|-------------------------|-----------|-----------|
|                  |                  |                | X                       | Y         | Z         |
| 1                | 45               | 0              | 0.553326                | 0.454419  | -0.338916 |
| 2                | 6                | 0              | -0.460796               | 1.807275  | 1.220754  |
| 3                | 6                | 0              | 0.221135                | -0.213890 | 2.390320  |
| 4                | 6                | 0              | 1.993190                | -2.613985 | 1.584846  |
| 5                | 6                | 0              | -1.376433               | 2.819611  | 0.657082  |
| 6                | 6                | 0              | -2.764158               | 2.719056  | 0.830323  |
| 7                | 6                | 0              | -0.790464               | 0.498417  | 1.520928  |
| 8                | 6                | 0              | 0.887665                | 2.195432  | 1.813422  |
| 9                | 6                | 0              | -1.729519               | 4.862702  | -0.614247 |
| 10               | 6                | 0              | 4.250537                | -3.468603 | 1.676949  |
| 11               | 6                | 0              | 0.421895                | 0.590561  | 3.700117  |
| 12               | 6                | 0              | 1.845737                | 1.162068  | 1.256837  |
| 13               | 6                | 0              | -3.620340               | 3.673496  | 0.288795  |
| 14               | 6                | 0              | 1.521041                | -0.155377 | 1.597125  |
| 15               | 6                | 0              | 3.848490                | -1.086034 | 1.689817  |
| 16               | 6                | 0              | -0.873677               | 3.909569  | -0.071087 |
| 17               | 6                | 0              | 0.805480                | 2.040443  | 3.352984  |
| 18               | 6                | 0              | -3.108337               | 4.749613  | -0.434869 |
| 19               | 6                | 0              | 2.463329                | -1.291717 | 1.616451  |
| 20               | 6                | 0              | 4.732028                | -2.160993 | 1.719363  |
| 21               | 6                | 0              | 2.874722                | -3.690055 | 1.609265  |
| 22               | 1                | 0              | 0.925561                | -2.805935 | 1.519522  |
| 23               | 1                | 0              | 4.940188                | -4.308199 | 1.700125  |
| 24               | 1                | 0              | 4.240570                | -0.074354 | 1.729502  |
| 25               | 1                | 0              | 5.801430                | -1.975891 | 1.777106  |
| 26               | 1                | 0              | 2.486822                | -4.704839 | 1.574521  |
| 27               | 1                | 0              | -3.177872               | 1.887575  | 1.392179  |
| 28               | 1                | 0              | -1.319899               | 5.694097  | -1.182090 |
| 29               | 1                | 0              | -4.692699               | 3.575520  | 0.434872  |
| 30               | 1                | 0              | 0.196739                | 4.000985  | -0.237755 |
| 31               | 1                | 0              | -3.778054               | 5.494596  | -0.856181 |
| 32               | 1                | 0              | -0.087588               | -1.236588 | 2.607850  |
| 33               | 1                | 0              | 1.184038                | 3.208264  | 1.539240  |
| 34               | 1                | 0              | -0.506920               | 0.553659  | 4.277680  |
| 35               | 1                | 0              | 1.196979                | 0.104909  | 4.301800  |
| 36               | 1                | 0              | 1.776033                | 2.308086  | 3.782734  |
| 37               | 1                | 0              | 0.071063                | 2.751612  | 3.744524  |
| 38               | 1                | 0              | 2.835317                | 1.452797  | 0.917540  |
| 39               | 1                | 0              | -1.779564               | 0.085017  | 1.349747  |
| 40               | 6                | 0              | 2.272734                | 0.292295  | -1.483676 |
| 41               | 6                | 0              | 3.089560                | -0.841402 | -1.586542 |
| 42               | 6                | 0              | 2.728724                | 1.468220  | -2.106506 |
| 43               | 6                | 0              | 4.307653                | -0.804572 | -2.272411 |
| 44               | 1                | 0              | 2.785234                | -1.778633 | -1.124703 |
| 45               | 6                | 0              | 3.948295                | 1.514783  | -2.784496 |
| 46               | 1                | 0              | 2.121576                | 2.372812  | -2.067511 |
| 47               | 6                | 0              | 4.747029                | 0.373625  | -2.872595 |
| 48               | 1                | 0              | 4.915489                | -1.705507 | -2.331659 |
| 49               | 1                | 0              | 4.271426                | 2.444100  | -3.250000 |
| 50               | 1                | 0              | 5.694547                | 0.402854  | -3.405137 |
| 51               | 6                | 0              | -0.139436               | -0.081820 | -2.459271 |

|    |   |   |           |           |           |
|----|---|---|-----------|-----------|-----------|
| 52 | 6 | 0 | -1.222287 | 0.285964  | -1.661105 |
| 53 | 1 | 0 | 0.301052  | 0.675982  | -3.102359 |
| 54 | 1 | 0 | -1.603474 | 1.305589  | -1.665083 |
| 55 | 6 | 0 | -2.140448 | -0.729889 | -1.131305 |
| 56 | 8 | 0 | -3.172803 | -0.400281 | -0.535183 |
| 57 | 6 | 0 | -1.853524 | -2.185361 | -1.418139 |
| 58 | 6 | 0 | 0.085564  | -1.511312 | -2.864277 |
| 59 | 6 | 0 | -0.411233 | -2.485326 | -1.806728 |
| 60 | 1 | 0 | -2.186095 | -2.779001 | -0.561282 |
| 61 | 1 | 0 | -2.529593 | -2.447088 | -2.244760 |
| 62 | 1 | 0 | 0.232761  | -2.401814 | -0.922988 |
| 63 | 1 | 0 | -0.331246 | -3.516421 | -2.167367 |
| 64 | 1 | 0 | -0.458143 | -1.672270 | -3.808387 |
| 65 | 1 | 0 | 1.143757  | -1.674754 | -3.083612 |
| 66 | 8 | 0 | -4.844505 | -2.134794 | 0.794950  |
| 67 | 1 | 0 | -4.282631 | -1.553524 | 0.233644  |
| 68 | 5 | 0 | -5.720729 | -2.873727 | 0.069665  |
| 69 | 8 | 0 | -5.700949 | -2.796424 | -1.314469 |
| 70 | 8 | 0 | -6.587924 | -3.680346 | 0.780446  |
| 71 | 1 | 0 | -6.379556 | -3.329914 | -1.744167 |
| 72 | 1 | 0 | -7.178747 | -4.195936 | 0.220647  |

```

-----
                1                2                3
                A                A                A
Frequencies --   8.6743           12.9896           16.9124
SCF Done: E(RPBE1PBE) = -6251.34729757   A.U. after   1 cycles
              Convg =   0.6925D-08           -V/T =   2.0050
Zero-point correction=                   0.595241 (Hartree/Particle)
Thermal correction to Energy=             0.632155
Thermal correction to Enthalpy=           0.633115
Thermal correction to Gibbs Free Energy=   0.520334
Sum of electronic and zero-point Energies= -6250.752057
Sum of electronic and thermal Energies=    -6250.715142
Sum of electronic and thermal Enthalpies=  -6250.714182
Sum of electronic and thermal Free Energies= -6250.826964
SCF Done: E(RM06L) = -1676.83519069   A.U. after   23 cycles
              Convg =   0.6000D-08           -V/T =   2.0481
SCF Done: E(RM06) = -1675.86266866   A.U. after   23 cycles
              Convg =   0.4264D-08           -V/T =   2.0488
SCF Done: E(RwB97XD) = -1676.49216314   A.U. after   22 cycles
              Convg =   0.8290D-08           -V/T =   2.0489

```

### Complex 4c

```

-----
Center   Atomic   Atomic   Coordinates (Angstroms)
Number   Number   Type     X           Y           Z
-----
   1         45         0       0.055412   -0.345457   -0.261131
   2         6          0       1.676996   -0.298415   1.368188
   3         6          0       0.044339   1.403520   1.964035
   4         6          0      -2.755948   2.102014   0.863545
   5         6          0       2.979770   -0.859928   0.957845

```

|    |   |   |           |           |           |
|----|---|---|-----------|-----------|-----------|
| 6  | 6 | 0 | 4.091714  | -0.031965 | 0.746502  |
| 7  | 6 | 0 | 1.256851  | 1.001863  | 1.155523  |
| 8  | 6 | 0 | 0.765628  | -1.028781 | 2.346661  |
| 9  | 6 | 0 | 4.357026  | -2.778170 | 0.373810  |
| 10 | 6 | 0 | -5.116536 | 1.710897  | 1.195209  |
| 11 | 6 | 0 | 0.340990  | 1.186543  | 3.470064  |
| 12 | 6 | 0 | -0.612229 | -0.905354 | 1.728039  |
| 13 | 6 | 0 | 5.314736  | -0.567839 | 0.354103  |
| 14 | 6 | 0 | -1.039059 | 0.414847  | 1.550502  |
| 15 | 6 | 0 | -3.499100 | 0.048890  | 1.873523  |
| 16 | 6 | 0 | 3.134817  | -2.242250 | 0.767852  |
| 17 | 6 | 0 | 0.791234  | -0.267793 | 3.696398  |
| 18 | 6 | 0 | 5.454462  | -1.942468 | 0.166491  |
| 19 | 6 | 0 | -2.442634 | 0.852670  | 1.421726  |
| 20 | 6 | 0 | -4.820245 | 0.472036  | 1.761506  |
| 21 | 6 | 0 | -4.076223 | 2.524784  | 0.746059  |
| 22 | 1 | 0 | -1.960553 | 2.745737  | 0.497159  |
| 23 | 1 | 0 | -6.148042 | 2.041670  | 1.107853  |
| 24 | 1 | 0 | -3.286901 | -0.916526 | 2.322979  |
| 25 | 1 | 0 | -5.621538 | -0.168784 | 2.119984  |
| 26 | 1 | 0 | -4.293622 | 3.492805  | 0.302089  |
| 27 | 1 | 0 | 3.999472  | 1.039840  | 0.890933  |
| 28 | 1 | 0 | 4.452567  | -3.850672 | 0.225339  |
| 29 | 1 | 0 | 6.163604  | 0.092354  | 0.197190  |
| 30 | 1 | 0 | 2.284828  | -2.905590 | 0.906391  |
| 31 | 1 | 0 | 6.410661  | -2.359605 | -0.137954 |
| 32 | 1 | 0 | -0.240422 | 2.437672  | 1.770180  |
| 33 | 1 | 0 | 1.053403  | -2.071712 | 2.481440  |
| 34 | 1 | 0 | 1.116927  | 1.894329  | 3.777558  |
| 35 | 1 | 0 | -0.558750 | 1.421117  | 4.048038  |
| 36 | 1 | 0 | 0.130047  | -0.783213 | 4.400313  |
| 37 | 1 | 0 | 1.803153  | -0.311813 | 4.111854  |
| 38 | 1 | 0 | -1.296634 | -1.748346 | 1.730480  |
| 39 | 1 | 0 | 1.858214  | 1.741576  | 0.636551  |
| 40 | 6 | 0 | -1.508519 | -1.510143 | -0.965580 |
| 41 | 6 | 0 | -2.812992 | -1.067950 | -1.222519 |
| 42 | 6 | 0 | -1.269901 | -2.892633 | -1.067963 |
| 43 | 6 | 0 | -3.834563 | -1.961606 | -1.559515 |
| 44 | 1 | 0 | -3.054408 | -0.008417 | -1.159051 |
| 45 | 6 | 0 | -2.286918 | -3.791312 | -1.395457 |
| 46 | 1 | 0 | -0.268259 | -3.285343 | -0.891938 |
| 47 | 6 | 0 | -3.579735 | -3.328787 | -1.645569 |
| 48 | 1 | 0 | -4.835831 | -1.580896 | -1.752199 |
| 49 | 1 | 0 | -2.066080 | -4.855162 | -1.460459 |
| 50 | 1 | 0 | -4.373873 | -4.023994 | -1.906848 |
| 51 | 6 | 0 | 0.302488  | -0.421256 | -2.539001 |
| 52 | 6 | 0 | 1.421519  | 0.155515  | -1.938217 |
| 53 | 1 | 0 | 0.343048  | -1.479766 | -2.783700 |
| 54 | 1 | 0 | 2.302870  | -0.438315 | -1.703180 |
| 55 | 6 | 0 | 1.628870  | 1.609001  | -1.979683 |
| 56 | 8 | 0 | 2.679271  | 2.113993  | -1.564646 |
| 57 | 6 | 0 | 0.574356  | 2.470659  | -2.635778 |
| 58 | 6 | 0 | -0.680533 | 0.407145  | -3.317672 |
| 59 | 6 | 0 | -0.796343 | 1.816969  | -2.759020 |

|    |   |   |           |           |           |
|----|---|---|-----------|-----------|-----------|
| 60 | 1 | 0 | 0.537004  | 3.431163  | -2.113045 |
| 61 | 1 | 0 | 0.973300  | 2.688062  | -3.637598 |
| 62 | 1 | 0 | -1.269263 | 1.764000  | -1.770840 |
| 63 | 1 | 0 | -1.444059 | 2.430301  | -3.394541 |
| 64 | 1 | 0 | -0.323777 | 0.444494  | -4.358933 |
| 65 | 1 | 0 | -1.654013 | -0.089000 | -3.340175 |
| 66 | 8 | 0 | 2.652962  | 4.864744  | -0.899724 |
| 67 | 1 | 0 | 3.365469  | 5.317005  | -1.368977 |
| 68 | 1 | 0 | 2.724145  | 3.926463  | -1.170657 |

```

-----
              1                      2                      3
              A                      A                      A
Frequencies -- 7.9724                23.2423                27.8674
SCF Done: E(RPBE1PBE) = -6075.45158816  A.U. after 1 cycles
              Conv = 0.3870D-08          -V/T = 2.0048
Zero-point correction= 0.569702 (Hartree/Particle)
Thermal correction to Energy= 0.603641
Thermal correction to Enthalpy= 0.604601
Thermal correction to Gibbs Free Energy= 0.500599
Sum of electronic and zero-point Energies= -6074.881886
Sum of electronic and thermal Energies= -6074.847947
Sum of electronic and thermal Enthalpies= -6074.846987
Sum of electronic and thermal Free Energies= -6074.950990
SCF Done: E(RM06L) = -1500.72179662  A.U. after 23 cycles
              Conv = 0.5650D-08          -V/T = 2.0536
SCF Done: E(RM06) = -1499.79952977  A.U. after 23 cycles
              Conv = 0.4846D-08          -V/T = 2.0543
SCF Done: E(RwB97XD) = -1500.40592805  A.U. after 25 cycles
              Conv = 0.8948D-08          -V/T = 2.0544

```

*2-cyclohexenone (1)*

```

-----
Center   Atomic   Atomic   Coordinates (Angstroms)
Number   Number   Type     X           Y           Z
-----
  1         6         0     -0.962786   1.316500   0.026452
  2         1         0     -1.472304   2.279416   0.022905
  3         6         0         0.378388   1.285575  -0.058478
  4         1         0         0.965700   2.195826  -0.153244
  5         6         0         1.134987   0.021818   0.015786
  6         8         0         2.356376   0.001849  -0.074855
  7         6         0     -1.810895   0.087597   0.133428
  8         1         0     -2.735892   0.230605  -0.435904
  9         1         0     -2.124409  -0.027400   1.181831
 10        6         0         0.327111  -1.233624   0.267527
 11        1         0         0.254269  -1.345523   1.358615
 12        1         0         0.896279  -2.090369  -0.102278
 13        6         0     -1.068843  -1.157153  -0.341705
 14        1         0     -1.639526  -2.058480  -0.096772
 15        1         0     -0.982898  -1.123150  -1.434372
-----
              1                      2                      3

```

```

Frequencies --      A              A              A
              103.2147          246.0748          307.9643
SCF Done: E(RPBE1PBE) = -308.332694733 A.U. after 1 cycles
              Conv = 0.2930D-08          -V/T = 2.0137
Zero-point correction=          0.128507 (Hartree/Particle)
Thermal correction to Energy=          0.134787
Thermal correction to Enthalpy=          0.135747
Thermal correction to Gibbs Free Energy=          0.097953
Sum of electronic and zero-point Energies=          -308.204188
Sum of electronic and thermal Energies=          -308.197907
Sum of electronic and thermal Enthalpies=          -308.196947
Sum of electronic and thermal Free Energies=          -308.234742
SCF Done: E(RM06L) = -308.743983765 A.U. after 13 cycles
              Conv = 0.4379D-08          -V/T = 2.0045
SCF Done: E(RM06) = -308.568231805 A.U. after 12 cycles
              Conv = 0.8364D-08          -V/T = 2.0052
SCF Done: E(RwB97XD) = -308.684808704 A.U. after 13 cycles
              Conv = 0.3554D-08          -V/T = 2.0052

```

*2-cyclohexenone*×3*H<sub>2</sub>O (1a)*

| Center Number | Atomic Number | Atomic Type | Coordinates (Angstroms) |           |           |
|---------------|---------------|-------------|-------------------------|-----------|-----------|
|               |               |             | X                       | Y         | Z         |
| 1             | 6             | 0           | 3.305622                | -0.728823 | 0.144604  |
| 2             | 6             | 0           | 2.250795                | -1.358471 | -0.403830 |
| 3             | 1             | 0           | 4.273541                | -1.228644 | 0.150722  |
| 4             | 1             | 0           | 2.344046                | -2.341261 | -0.858903 |
| 5             | 6             | 0           | 0.902757                | -0.775551 | -0.369246 |
| 6             | 8             | 0           | -0.050363               | -1.376384 | -0.868667 |
| 7             | 6             | 0           | 0.739283                | 0.538845  | 0.352809  |
| 8             | 1             | 0           | -0.136067               | 1.066867  | -0.035180 |
| 9             | 6             | 0           | 3.223922                | 0.630800  | 0.762851  |
| 10            | 6             | 0           | 1.997389                | 1.398300  | 0.283280  |
| 11            | 1             | 0           | 2.159042                | 1.713669  | -0.754249 |
| 12            | 1             | 0           | 1.859557                | 2.309584  | 0.872527  |
| 13            | 1             | 0           | 3.201645                | 0.510187  | 1.856563  |
| 14            | 1             | 0           | 4.143510                | 1.185948  | 0.547606  |
| 15            | 8             | 0           | -4.218079               | -1.063731 | 1.343715  |
| 16            | 8             | 0           | -2.240919               | 2.380578  | -0.505555 |
| 17            | 8             | 0           | -2.686465               | -0.305620 | -0.923380 |
| 18            | 1             | 0           | -4.415011               | -0.240585 | 1.812410  |
| 19            | 1             | 0           | -5.078984               | -1.437960 | 1.110887  |
| 20            | 1             | 0           | -2.397850               | 2.830879  | -1.345181 |
| 21            | 1             | 0           | -2.444277               | 1.431933  | -0.682913 |
| 22            | 1             | 0           | -3.174148               | -0.663569 | -0.154756 |
| 23            | 1             | 0           | -1.804771               | -0.732254 | -0.911346 |
| 24            | 1             | 0           | 0.517762                | 0.285870  | 1.400099  |

  

|                | 1       | 2       | 3       |
|----------------|---------|---------|---------|
|                | A       | A       | A       |
| Frequencies -- | 13.0532 | 19.9319 | 33.9712 |

SCF Done: E(RPBE1PBE) = -537.421086880 A.U. after 1 cycles  
 Conv g = 0.3867D-08 -V/T = 2.0120  
 Zero-point correction= 0.202848 (Hartree/Particle)  
 Thermal correction to Energy= 0.219107  
 Thermal correction to Enthalpy= 0.220067  
 Thermal correction to Gibbs Free Energy= 0.154915  
 Sum of electronic and zero-point Energies= -537.218238  
 Sum of electronic and thermal Energies= -537.201980  
 Sum of electronic and thermal Enthalpies= -537.201020  
 Sum of electronic and thermal Free Energies= -537.266172  
 SCF Done: E(RM06L) = -538.115064052 A.U. after 13 cycles  
 Conv g = 0.9610D-08 -V/T = 2.0041  
 SCF Done: E(RM06) = -537.875549386 A.U. after 12 cycles  
 Conv g = 0.9336D-08 -V/T = 2.0045  
 SCF Done: E(RwB97XD) = -538.039399066 A.U. after 13 cycles  
 Conv g = 0.5740D-08 -V/T = 2.0048

*2-cyclohexenone*×*H<sub>3</sub>BO<sub>3</sub>* (1b)

| Center Number | Atomic Number | Atomic Type | Coordinates (Angstroms) |           |           |
|---------------|---------------|-------------|-------------------------|-----------|-----------|
|               |               |             | X                       | Y         | Z         |
| 1             | 6             | 0           | -3.350365               | 0.422215  | 0.547377  |
| 2             | 6             | 0           | -2.315377               | 1.262439  | 0.366757  |
| 3             | 1             | 0           | -4.274523               | 0.808085  | 0.975792  |
| 4             | 1             | 0           | -2.382686               | 2.317656  | 0.618268  |
| 5             | 6             | 0           | -1.016020               | 0.785752  | -0.121811 |
| 6             | 8             | 0           | -0.070573               | 1.565025  | -0.251215 |
| 7             | 6             | 0           | -0.877189               | -0.691854 | -0.391986 |
| 8             | 6             | 0           | -3.301462               | -1.032061 | 0.201492  |
| 9             | 6             | 0           | -2.195859               | -1.338350 | -0.802478 |
| 10            | 1             | 0           | -0.095869               | -0.839027 | -1.142101 |
| 11            | 1             | 0           | -0.500876               | -1.137318 | 0.539372  |
| 12            | 1             | 0           | -2.494366               | -0.954456 | -1.785052 |
| 13            | 1             | 0           | -2.066626               | -2.419507 | -0.910742 |
| 14            | 1             | 0           | -3.149688               | -1.601651 | 1.130644  |
| 15            | 1             | 0           | -4.276891               | -1.349858 | -0.182307 |
| 16            | 8             | 0           | 2.515206                | 0.713476  | -0.843818 |
| 17            | 1             | 0           | 1.603280                | 0.991085  | -0.608658 |
| 18            | 5             | 0           | 3.069788                | -0.097490 | 0.091162  |
| 19            | 8             | 0           | 2.317067                | -0.496991 | 1.186499  |
| 20            | 8             | 0           | 4.375917                | -0.489091 | -0.124032 |
| 21            | 1             | 0           | 2.808661                | -1.034517 | 1.818457  |
| 22            | 1             | 0           | 4.717346                | -1.081234 | 0.554938  |

|                | 1       | 2       | 3       |
|----------------|---------|---------|---------|
|                | A       | A       | A       |
| Frequencies -- | 23.6666 | 34.7631 | 39.8876 |

SCF Done: E(RPBE1PBE) = -560.589911517 A.U. after 1 cycles  
 Conv g = 0.2429D-08 -V/T = 2.0123  
 Zero-point correction= 0.178857 (Hartree/Particle)  
 Thermal correction to Energy= 0.191486

Thermal correction to Enthalpy= 0.192446  
 Thermal correction to Gibbs Free Energy= 0.136722  
 Sum of electronic and zero-point Energies= -560.411055  
 Sum of electronic and thermal Energies= -560.398425  
 Sum of electronic and thermal Enthalpies= -560.397465  
 Sum of electronic and thermal Free Energies= -560.453189  
 SCF Done: E(RM06L) = -561.314823144 A.U. after 14 cycles  
           Convrg = 0.5256D-08 -V/T = 2.0042  
 SCF Done: E(RM06) = -561.067495414 A.U. after 13 cycles  
           Convrg = 0.3315D-08 -V/T = 2.0046  
 SCF Done: E(RwB97XD) = -561.222233795 A.U. after 13 cycles  
           Convrg = 0.7359D-08 -V/T = 2.0048

*2-cyclohexenone*×*H<sub>2</sub>O* (1c)

| Center Number | Atomic Number | Atomic Type | Coordinates (Angstroms) |           |           |
|---------------|---------------|-------------|-------------------------|-----------|-----------|
|               |               |             | X                       | Y         | Z         |
| 1             | 6             | 0           | -2.161534               | 0.820197  | -0.004833 |
| 2             | 6             | 0           | -0.947979               | 1.397383  | -0.069818 |
| 3             | 1             | 0           | -3.048345               | 1.452268  | -0.029303 |
| 4             | 1             | 0           | -0.830051               | 2.473444  | -0.167954 |
| 5             | 6             | 0           | 0.285383                | 0.607816  | 0.039362  |
| 6             | 8             | 0           | 1.389014                | 1.151228  | -0.024764 |
| 7             | 6             | 0           | 0.133708                | -0.872175 | 0.293293  |
| 8             | 6             | 0           | -2.367816               | -0.656714 | 0.109971  |
| 9             | 6             | 0           | -1.136361               | -1.438764 | -0.332988 |
| 10            | 1             | 0           | 1.033913                | -1.386014 | -0.053728 |
| 11            | 1             | 0           | 0.100801                | -0.994921 | 1.385324  |
| 12            | 1             | 0           | -1.054296               | -1.384007 | -1.424889 |
| 13            | 1             | 0           | -1.242180               | -2.496938 | -0.075786 |
| 14            | 1             | 0           | -2.617156               | -0.888200 | 1.156519  |
| 15            | 1             | 0           | -3.247912               | -0.949200 | -0.472909 |
| 16            | 8             | 0           | 3.706729                | -0.522201 | 0.022549  |
| 17            | 1             | 0           | 4.356968                | -0.101163 | -0.553979 |
| 18            | 1             | 0           | 2.949903                | 0.096059  | 0.044505  |

-----  
                                   1                                  2                                  3  
                                   A                                  A                                  A  
 Frequencies -- 34.0411                                  50.5148                                  89.7408  
 SCF Done: E(RPBE1PBE) = -384.694483735 A.U. after 1 cycles  
           Convrg = 0.3675D-08 -V/T = 2.0129  
 Zero-point correction= 0.152834 (Hartree/Particle)  
 Thermal correction to Energy= 0.162721  
 Thermal correction to Enthalpy= 0.163681  
 Thermal correction to Gibbs Free Energy= 0.116079  
 Sum of electronic and zero-point Energies= -384.541650  
 Sum of electronic and thermal Energies= -384.531763  
 Sum of electronic and thermal Enthalpies= -384.530802  
 Sum of electronic and thermal Free Energies= -384.578405  
 SCF Done: E(RM06L) = -385.201053402 A.U. after 13 cycles  
           Convrg = 0.8525D-08 -V/T = 2.0043

SCF Done: E(RM06) = -385.003880612 A.U. after 12 cycles  
 Convg = 0.6218D-08 -V/T = 2.0048  
 SCF Done: E(RwB97XD) = -1423.95354902 A.U. after 25 cycles  
 Convg = 0.6705D-08 -V/T = 2.0572

## 9. References

1. CP2K website, <https://www.cp2k.org/about> (accessed 05.2023).
2. G. Bussi, D. Donadio and M. Parrinello, *J. Chem. Phys.*, 2007, **126**, 014101.
3. a) T. D. Kühne, M. Iannuzzi, M. Del Ben, V. V. Rybkin, P. Seewald, F. Stein, T. Laino, R. Z. Khaliullin, O. Schütt, F. Schiffrmann, D. Golze, J. Wilhelm, S. Chulkov, M. H. Bani-Hashemian, V. Weber, U. Borštnik, M. Taillefumier, A. S. Jakobovits, A. Lazzaro, H. Pabst, T. Müller, R. Schade, M. Guidon, S. Andermatt, N. Holmberg, G. K. Schenter, A. Hehn, A. Bussy, F. Belleflamme, G. Tabacchi, A. Glöß, M. Lass, I. Bethune, C. J. Mundy, C. Plessl, M. Watkins, J. VandeVondele, M. Krack and J. Hutter, *J. Chem. Phys.*, 2020, **152**, 194103; b) J. VandeVondele, M. Krack, F. Mohamed, M. Parrinello, T. Chassaing and J. Hutter, *Comput. Phys. Commun.*, 2005, **167**, 103-128.
4. J. P. Perdew, K. Burke and M. Ernzerhof, *Phys. Rev. Lett.*, 1996, **77**, 3685-3868; errata: *ibid*, 1997, **78**, 1396.
5. S. Grimme, J. Antony, S. Ehrlich and H. Krieg, *J. Chem. Phys.*, 2010, **132**, 154104.
6. a) M. Krack, *Theor. Chem. Account.*, 2005, **114**, 145-152; b) C. Hartwigsen, S. Goedecker and J. Hutter, *Phys. Rev. B*, 1998, **58**, 3641-3662; c) S. Goedecker, M. Teter and J. Hutter, *Phys. Rev. B*, 1996, **54**, 1703-1710.
7. G. Lippert, J. Hutter, and M. Parrinello, *Mol. Phys.*, 1997, **92**, 477-488.
8. J. VandeVondele and J. Hutter, *J. Chem. Phys.*, 2007, **127**, 114105.
9. J. VandeVondele and J. Hutter, *J. Chem. Phys.*, 2003, **118**, 4365-4369.
10. CP2K User Manual, [https://manual.cp2k.org/trunk/CP2K\\_INPUT/FORCE\\_EVAL/DFT/MGRID.html#CUTOFF](https://manual.cp2k.org/trunk/CP2K_INPUT/FORCE_EVAL/DFT/MGRID.html#CUTOFF) (accessed 05.2023).
11. a) M. Iannuzzi, A. Laio and M. Parrinello, *Phys. Rev. Lett.*, 2003, **90**, 238302; b) A. Laio and M. Parrinello, *Proc. Natl. Acad. Sci.*, 2002, **99**, 12562.
12. M. J. Frisch, G. W. Trucks, H. B. Schlegel, G. E. Scuseria, M. A. Robb, J. R. Cheeseman, G. Scalmani, V. Barone, B. Mennucci, G. A. Petersson, H. Nakatsuji, M. Caricato, X. Li, H. P. Hratchian, A. F. Izmaylov, J. Bloino, G. Zheng, J. L. Sonnenberg, M. Hada, M. Ehara, K. Toyota, R. Fukuda, J. Hasegawa, M. Ishida, T. Nakajima, Y. Honda, O. Kitao, H. Nakai, T. Vreven, J. A. Montgomery, Jr., J. E. Peralta, F. Ogliaro, M. Bearpark, J. J. Heyd, E. Brothers, K. N. Kudin, V. N. Staroverov, R. Kobayashi, J. Normand, K. Raghavachari, A. Rendell, J. C. Burant, S. S. Iyengar, J. Tomasi, M. Cossi, N. Rega, N. J. Millam, M. Klene, J. E. Knox, J. B. Cross, V. Bakken, C. Adamo, J. Jaramillo, R. Gomperts, R. E. Stratmann, O. Yazyev, A. J. Austin, R. Cammi, C. Pomelli, J. W. Ochterski, R. L. Martin, K. Morokuma, V. G. Zakrzewski, G. A. Voth, P. Salvador, J. J. Dannenberg, S. Dapprich, A. D. Daniels, Ö. Farkas, J. B. Foresman, J. V. Ortiz, J. Cioslowski, and D. J. Fox, *Gaussian 09, Revision A.02* (accessed 12.2022).
13. Y. Zhao, N. E. Schultz and D. G. Truhlar, *J. Chem. Phys.*, 2006, **125**, 194101.
14. Y. Zhao and D. Truhlar, *Theor. Chem. Account.*, 2008, **120**, 215-241.
15. J.-D. Chai and M. Head-Gordon, *Phys. Chem. Chem. Phys.*, 2008, **10**, 6615-6620.
16. J. Tomasi, B. Mennucci and R. Cammi, *Chem. Rev.*, 2005, **105**, 2999-3093.
17. A. V. Marenich, C. J. Cramer and D. Truhlar, *J. Phys. Chem. B*, 2009, **113**, 6378-6396.
18. N. Godbout, D. R. Salahub, J. Andzelm and E. Wimmer, *Can. J. Chem.*, 1992, **70**, 560-571.
19. a) F. Weigend, *Phys. Chem. Chem. Phys.*, 2006, **8**, 1057-1065; b) F. Weigend and R. Ahlrichs, *Phys. Chem. Chem. Phys.*, 2005, **7**, 3297-3305.



20. S. J. Grabowski, *Understanding Hydrogen Bonds: Theoretical and Experimental Views*, The Royal Society of Chemistry, Cambridge, **2021**, pp. 1-40; b) G. A. Jeffrey, *An Introduction to Hydrogen Bonding*, Oxford University Press, New York, **1997**.
